# Supplementary material for: Arabidopsis Flower and Embryo Developmental Genes are Repressed in Seedlings by Different Combinations of Polycomb Group Proteins in Association with Distinct Sets of Cis-regulatory Elements
Source: PLoS Genet. 2016 Jan 13;12(1):e1005771. doi: 10.1371/journal.pgen.1005771 (PMC4711971; doi:10.1371/journal.pgen.1005771)
Supplement: S2 Table — (A) ChIP-seq and RNA-seq read statistics for each sample. (B) 5,055 H3K27me3 peaks identified in Col-0, as well as list of peak target, which is defined as the nearest gene whose gene body is located within 1 kb upstream or 1 kb downstream of the peak region. (C) Biological functions enriched in Col-0 H3K27me3 peak targets, including GO terms of biological process (BP), molecular function (MF), cellular compartment (CC), and Interpro domains. (D) Motifs enriched in 5,055 Col-0 H3K27me3 peaks with P<1e-5, as well as the enrichment statistics of CArG box motifs. (XLSX) [file pgen.1005771.s019.xlsx]

## Sheet: S2A_read_statistics
Table S2A. ChIPseq and RNAseq read statistics for each sample.
ChIP-seq
Sample	`	# mapped	% mapped	# MAPQ>20	% MAPQ>20
Col_H3K27me3	36748318	17371725	47	13511258	37
Col_H3K27me3_rep2	39843278	5857526	14.7014	3315229	8.32067
Col_neg	39180455	4705233	12	1850488	5
clf-29_H3K27me3	34284472	16218454	47	11910922	35
clf-29_H3K27me3_rep2	51859174	6762111	13.0394	4190617	8.08076
clf-29_neg	35856132	5019488	14	1732079	5
tfl2-2_H3K27me3	38715308	22141539	57	17532700	45
lhp1-6_H3K27me3	36194758	21842534	60.3472	17583459	48.5801
tfl2-2_neg	34735909	8368958	24	4197631	12
atbmi1a,b_H3K27me3	34904700	18291083	52	13750664	39
atbmi1a,b_H3K27me3_rep2	51441822	13759282	26.7473	9661741	18.7819
atbmi1a,b_neg	95319300	20025017	21	9812249	10
atring1a,b_H3K27me3	57038741	42650449	75	36860887	65
atring1a,b_H3K27me3_rep2	40414232	4577815	11	2111723	5
atring1a,b_neg	49640455	42650449	86	11531934	23
RNA-seq
sample	nfragment	nfrag uniquely mapped	nfrag uniquely mapped with MAPQ>20
Col-0	68681878	52722219	36521072
Col-0_rep2	29525522	29227458	21813941
clf-29	51705766	51482872	35771485
clf-29_rep2	28372624	28240808	21125171
tfl2-2	51365761	50229228	35827416
lhp1-6	51903336	51474700	34977817
atbmi1a,b	52231054	51861729	37260679
atbmi1a,b_rep2	29871295	29728181	22148370
atring1a,b	52247124	51923425	37112395
atring1a,b_rep2	28905516	28571191	21023488
clf-29swn-21	40886982	40131228	28400617
clf-29swn-21_rep2	27656800	27175102	17597284
swn-21	27996296	27822042	21097456
swn-21_rep2	34826803	34588556	25453766

## Sheet: S2B_Col_H3K27me3_peaks
Table S2B. 5,055 H3K27me3 peaks identified in Col-0, as well as peak target with nearest peak located within 1kb up stream of gene body or inside the gene body. Their overlap with LHP1, EMF1 and FIE binding sites are also included in this table.
peak info					target_gene(with nearest peak in promoter (1Kb upstream TSS) or gene body)											LHP1/EMF1/FIE Binding （number of overlap)
Chr_id	bpstart	bpend	PeakID	score = -log10(Pvalue)	target_gene(distance of peak to gene body <1kb)	gene_type	Short_description	Curator_summary	Computational_description	distance_to_peak	Chr_id	TAIR_build	gene_start	gene_end	gene_strand	LHP1_binding(GSE8169)	EMF1_binding(GSE34689)	FIE_binding(GSE48857)
1	11727	13912	MACS_peak_1	247.66	AT1G01030	protein_coding_gene	AP2/B3-like transcriptional factor family protein	---	NGATHA3 (NGA3); CONTAINS InterPro DOMAIN/s: Transcriptional factor B3 (InterPro:IPR003340); BEST Arabidopsis thaliana protein match is: AP2/B3-like transcriptional factor family protein (TAIR:AT4G01500.1); Has 1380 Blast hits to 1379 proteins in 72 species: Archae - 0; Bacteria - 0; Metazoa - 0; Fungi - 0; Plants - 1380; Viruses - 0; Other Eukaryotes - 0 (source: NCBI BLink).	0	1	TAIR10	11649	13714	-	0	1	1
1	18856	19810	MACS_peak_2	119.97	---	---	---	---	---	---	---	---	---	---	---	0	0	0
1	38715	41280	MACS_peak_3	135.37	AT1G01070	protein_coding_gene	nodulin MtN21 /EamA-like transporter family protein	nodulin MtN21-like transporter family protein	nodulin MtN21 /EamA-like transporter family protein; LOCATED IN: membrane; EXPRESSED IN: 17 plant structures; EXPRESSED DURING: 7 growth stages; CONTAINS InterPro DOMAIN/s: Protein of unknown function DUF6, transmembrane (InterPro:IPR000620); BEST Arabidopsis thaliana protein match is: nodulin MtN21 /EamA-like transporter family protein (TAIR:AT1G11460.1); Has 3211 Blast hits to 3199 proteins in …	0	1	TAIR10	38752	40944	-	1	0	0
1	78632	80312	MACS_peak_4	392.45	AT1G01183	miRNA	MIR165/MIR165A; miRNA	Encodes a microRNA that targets several HD-ZIPIII family members including PHV, PHB, REV, ATHB-8, and ATHB-15. MicroRNAs are regulatory RNAs with a mature length of ~21-nucleotides that are processed from hairpin precursors by Dicer-like enzymes. MicroRNAs can negatively regulate gene expression by attenuating translation or by directing mRNA cleavage.Mature sequence: UCGGACCAGGCUUCAUCCCC	---	0	1	TAIR10	78932	79032	-	0	1	0
1	83772	85316	MACS_peak_5	156.93	AT1G01190	protein_coding_gene	cytochrome P450, family 78, subfamily A, polypeptide 8	member of CYP78A	cytochrome P450, family 78, subfamily A, polypeptide 8 (CYP78A8); FUNCTIONS IN: electron carrier activity, monooxygenase activity, iron ion binding, oxygen binding, heme binding; INVOLVED IN: oxidation reduction; LOCATED IN: endomembrane system; EXPRESSED IN: 6 plant structures; EXPRESSED DURING: LP.10 ten leaves visible, LP.02 two leaves visible, LP.12 twelve leaves visible; CONTAINS InterPro DO…	0	1	TAIR10	83045	84864	-	0	1	0
1	104370	105669	MACS_peak_6	262.87	AT1G01250	protein_coding_gene	Integrase-type DNA-binding superfamily protein	encodes a member of the DREB subfamily A-4 of ERF/AP2 transcription factor family. The protein contains one AP2 domain. There are 17 members in this subfamily including TINY.	Integrase-type DNA-binding superfamily protein; FUNCTIONS IN: DNA binding, sequence-specific DNA binding transcription factor activity; INVOLVED IN: regulation of transcription, DNA-dependent; LOCATED IN: nucleus, chloroplast; EXPRESSED IN: 10 plant structures; EXPRESSED DURING: 6 growth stages; CONTAINS InterPro DOMAIN/s: DNA-binding, integrase-type (InterPro:IPR016177), Pathogenesis-related tra…	0	1	TAIR10	104491	105330	-	0	2	1
1	113119	114026	MACS_peak_7	106.75	AT1G01280	protein_coding_gene	cytochrome P450, family 703, subfamily A, polypeptide 2	member of CYP703A CYP703A2 is expressed specifically in anthers of land plants, catalyzing the in-chain hydroxylation at the C-7 position of medium-chain saturated fatty acids (lauric acid in-chain hydroxylase) which is involved in pollen development (sporopollenin synthesis).	cytochrome P450, family 703, subfamily A, polypeptide 2 (CYP703A2); FUNCTIONS IN: oxidoreductase activity, acting on paired donors, with incorporation or reduction of molecular oxygen, NADH or NADPH as one donor, and incorporation of one atom of oxygen, oxygen binding; INVOLVED IN: medium-chain fatty acid metabolic process, pollen wall assembly, medium-chain fatty acid biosynthetic process, sporo…	0	1	TAIR10	112263	113947	+	0	0	0
1	138206	139729	MACS_peak_8	520.1	AT1G01355	protein_coding_gene	Putative endonuclease or glycosyl hydrolase	---	Putative endonuclease or glycosyl hydrolase; FUNCTIONS IN: zinc ion binding; INVOLVED IN: biological_process unknown; LOCATED IN: intracellular; CONTAINS InterPro DOMAIN/s: Zinc finger, C2H2-type (InterPro:IPR007087); BEST Arabidopsis thaliana protein match is: Putative endonuclease or glycosyl hydrolase (TAIR:AT5G35640.1); Has 30201 Blast hits to 17322 proteins in 780 species: Archae - 12; Bacte…	0	1	TAIR10	138513	139568	+	0	1	0
1	148208	150232	MACS_peak_9	78.93	AT1G01390	protein_coding_gene	UDP-Glycosyltransferase superfamily protein	---	UDP-Glycosyltransferase superfamily protein; FUNCTIONS IN: UDP-glycosyltransferase activity, transferase activity, transferring glycosyl groups; INVOLVED IN: metabolic process; EXPRESSED IN: 7 plant structures; EXPRESSED DURING: 9 growth stages; CONTAINS InterPro DOMAIN/s: UDP-glucuronosyl/UDP-glucosyltransferase (InterPro:IPR002213); BEST Arabidopsis thaliana protein match is: UDP-glucosyl trans…	0	1	TAIR10	148120	149806	-	0	0	0
1	152680	154433	MACS_peak_10	195.2	AT1G01410	protein_coding_gene	pumilio 22	Encodes a member of the Arabidopsis Pumilio (APUM) proteins containing PUF domain (eight repeats of approximately 36 amino acids each). PUF proteins regulate both mRNA stability and translation through sequence-specific binding to the 3' UTR of target mRNA transcripts.	pumilio 22 (PUM22); FUNCTIONS IN: RNA binding, binding; INVOLVED IN: biological_process unknown; LOCATED IN: cellular_component unknown; CONTAINS InterPro DOMAIN/s: Pumilio RNA-binding repeat (InterPro:IPR001313), Armadillo-like helical (InterPro:IPR011989), Armadillo-type fold (InterPro:IPR016024); BEST Arabidopsis thaliana protein match is: ARM repeat superfamily protein (TAIR:AT5G64490.1); Has…	0	1	TAIR10	153113	154198	+	0	0	0
1	167075	168264	MACS_peak_11	223.17	AT1G01453	protein_coding_gene	---	---	unknown protein; FUNCTIONS IN: molecular_function unknown; INVOLVED IN: biological_process unknown; LOCATED IN: cellular_component unknown; BEST Arabidopsis thaliana protein match is: unknown protein (TAIR:AT4G01110.1); Has 30201 Blast hits to 17322 proteins in 780 species: Archae - 12; Bacteria - 1396; Metazoa - 17338; Fungi - 3422; Plants - 5037; Viruses - 0; Other Eukaryotes - 2996 (source: NC…	0	1	TAIR10	166589	167842	-	0	1	0
1	209023	210614	MACS_peak_12	269.83	AT1G01580	protein_coding_gene	ferric reduction oxidase 2	Encodes the low-iron-inducible ferric chelate reductase responsible for reduction of iron at the root surface. It is likely to be the major Fe(III) chelate reductase in Arabidopsis iron metabolism. Coordinately regulated with IRT1, the major transporter responsible for high-affinity iron uptake from the soil, at both transcriptional and posttranscriptional levels. Steady state mRNA levels are reg…	ferric reduction oxidase 2 (FRO2); CONTAINS InterPro DOMAIN/s: Ferredoxin reductase-type FAD-binding domain (InterPro:IPR017927), Ferric reductase, NAD binding (InterPro:IPR013121), FAD-binding 8 (InterPro:IPR013112), Riboflavin synthase-like beta-barrel (InterPro:IPR017938), Ferric reductase-like transmembrane component, N-terminal (InterPro:IPR013130); BEST Arabidopsis thaliana protein match is…	0	1	TAIR10	209395	213041	+	1	1	0
1	243922	245786	MACS_peak_13	111.07	AT1G01670	protein_coding_gene	RING/U-box superfamily protein	---	RING/U-box superfamily protein; FUNCTIONS IN: ubiquitin-protein ligase activity; INVOLVED IN: protein ubiquitination; LOCATED IN: ubiquitin ligase complex; EXPRESSED IN: 12 plant structures; EXPRESSED DURING: 7 growth stages; CONTAINS InterPro DOMAIN/s: U box domain (InterPro:IPR003613); BEST Arabidopsis thaliana protein match is: RING/U-box superfamily protein (TAIR:AT3G61390.2); Has 3857 Blast …	0	1	TAIR10	242843	245988	-	0	1	0
1	246295	247618	MACS_peak_14	59.37	AT1G01680	protein_coding_gene	plant U-box 54	---	plant U-box 54 (PUB54); FUNCTIONS IN: ubiquitin-protein ligase activity; INVOLVED IN: response to stress, protein ubiquitination; LOCATED IN: ubiquitin ligase complex; CONTAINS InterPro DOMAIN/s: UspA (InterPro:IPR006016), U box domain (InterPro:IPR003613); BEST Arabidopsis thaliana protein match is: RING/U-box superfamily protein (TAIR:AT1G01660.1); Has 2251 Blast hits to 2122 proteins in 140 sp…	0	1	TAIR10	246411	248367	-	0	1	0
1	256819	257691	MACS_peak_15	375.64	---	---	---	---	---	---	---	---	---	---	---	1	0	0
1	311112	311944	MACS_peak_16	66.29	AT1G01900	protein_coding_gene	subtilase family protein	Encodes AtSBT1.1, a subtilisin-like serine protease. Cleaves the phytosulfokine AtPSK4, a growth promoting peptide.	SBTI1.1; FUNCTIONS IN: serine-type endopeptidase activity; INVOLVED IN: proteolysis, negative regulation of catalytic activity; LOCATED IN: extracellular matrix, apoplast, cell wall; EXPRESSED IN: 19 plant structures; EXPRESSED DURING: 11 growth stages; CONTAINS InterPro DOMAIN/s: Protease-associated PA (InterPro:IPR003137), Peptidase S8/S53, subtilisin/kexin/sedolisin (InterPro:IPR000209), Pepti…	0	1	TAIR10	310316	313130	+	0	0	0
1	311978	312799	MACS_peak_17	50.04	AT1G01900	protein_coding_gene	subtilase family protein	Encodes AtSBT1.1, a subtilisin-like serine protease. Cleaves the phytosulfokine AtPSK4, a growth promoting peptide.	SBTI1.1; FUNCTIONS IN: serine-type endopeptidase activity; INVOLVED IN: proteolysis, negative regulation of catalytic activity; LOCATED IN: extracellular matrix, apoplast, cell wall; EXPRESSED IN: 19 plant structures; EXPRESSED DURING: 11 growth stages; CONTAINS InterPro DOMAIN/s: Protease-associated PA (InterPro:IPR003137), Peptidase S8/S53, subtilisin/kexin/sedolisin (InterPro:IPR000209), Pepti…	0	1	TAIR10	310316	313130	+	0	0	0
1	357659	359133	MACS_peak_18	472.28	AT1G02050	protein_coding_gene	Chalcone and stilbene synthase family protein	---	LESS ADHESIVE POLLEN 6 (LAP6); FUNCTIONS IN: transferase activity, transferring acyl groups other than amino-acyl groups, catalytic activity, acyltransferase activity; INVOLVED IN: phenylpropanoid biosynthetic process, pollen exine formation; EXPRESSED IN: 11 plant structures; EXPRESSED DURING: 6 growth stages; CONTAINS InterPro DOMAIN/s: Chalcone/stilbene synthase, N-terminal (InterPro:IPR001099…	0	1	TAIR10	359117	360518	-	0	0	1
1	365090	367715	MACS_peak_19	639.4	AT1G02065	protein_coding_gene	squamosa promoter binding protein-like 8	Encodes an SBP-box gene, a member of the SPL gene family. Mutants are affected in micro- and megasporogenesis, trichome formation on sepals, and stamen filament elongation.	squamosa promoter binding protein-like 8 (SPL8); CONTAINS InterPro DOMAIN/s: Transcription factor, SBP-box (InterPro:IPR004333); BEST Arabidopsis thaliana protein match is: squamosa promoter binding protein-like 2 (TAIR:AT5G43270.1); Has 903 Blast hits to 889 proteins in 57 species: Archae - 0; Bacteria - 2; Metazoa - 44; Fungi - 4; Plants - 841; Viruses - 0; Other Eukaryotes - 12 (source: NCBI B…	0	1	TAIR10	365209	367340	+	0	1	0
1	369861	372622	MACS_peak_20	67.8	AT1G02074	protein_coding_gene	---	---	unknown protein; Has 30201 Blast hits to 17322 proteins in 780 species: Archae - 12; Bacteria - 1396; Metazoa - 17338; Fungi - 3422; Plants - 5037; Viruses - 0; Other Eukaryotes - 2996 (source: NCBI BLink).	0	1	TAIR10	372064	372210	+	1	2	0
1	414687	418269	MACS_peak_21	565.56	AT1G02190	protein_coding_gene	Fatty acid hydroxylase superfamily	---	Fatty acid hydroxylase superfamily; FUNCTIONS IN: oxidoreductase activity, iron ion binding, catalytic activity; INVOLVED IN: oxidation reduction, fatty acid biosynthetic process; LOCATED IN: endoplasmic reticulum; EXPRESSED IN: 12 plant structures; EXPRESSED DURING: 6 growth stages; CONTAINS InterPro DOMAIN/s: Fatty acid hydroxylase (InterPro:IPR006694), Uncharacterised protein, Wax2 C-terminal …	0	1	TAIR10	415079	418010	+	1	0	1
1	459746	461174	MACS_peak_22	222.22	AT1G02310	protein_coding_gene	Glycosyl hydrolase superfamily protein	---	Glycosyl hydrolase superfamily protein; FUNCTIONS IN: cation binding, hydrolase activity, hydrolyzing O-glycosyl compounds, catalytic activity; INVOLVED IN: carbohydrate metabolic process; LOCATED IN: endomembrane system; EXPRESSED IN: 7 plant structures; EXPRESSED DURING: 4 anthesis, petal differentiation and expansion stage, D bilateral stage; CONTAINS InterPro DOMAIN/s: Glycoside hydrolase, ca…	0	1	TAIR10	458133	460696	-	0	0	0
1	463813	467943	MACS_peak_23	457.62	AT1G02340	protein_coding_gene	basic helix-loop-helix (bHLH) DNA-binding superfamily protein	Encodes a light-inducible, nuclear bHLH protein involved in phytochrome signaling. Mutants exhibit a long-hypocotyl phenotype only under far-red light but not under red light and are defective in other phytochrome A-related responses. Mutants also show blue light response defects. HFR1 interacts with COP1, co-localizes to the nuclear specks and is ubiquinated by COP1.	LONG HYPOCOTYL IN FAR-RED (HFR1); CONTAINS InterPro DOMAIN/s: Helix-loop-helix DNA-binding domain (InterPro:IPR001092), Helix-loop-helix DNA-binding (InterPro:IPR011598); BEST Arabidopsis thaliana protein match is: phytochrome interacting factor 3 (TAIR:AT1G09530.2); Has 1715 Blast hits to 1709 proteins in 90 species: Archae - 0; Bacteria - 0; Metazoa - 4; Fungi - 4; Plants - 1707; Viruses - 0; O…	0	1	TAIR10	465718	467844	-	0	2	1
1	472461	473235	MACS_peak_24	83.53	AT1G02360	protein_coding_gene	Chitinase family protein	---	Chitinase family protein; FUNCTIONS IN: chitinase activity; INVOLVED IN: carbohydrate metabolic process, cell wall macromolecule catabolic process; LOCATED IN: endomembrane system; EXPRESSED IN: stem, cotyledon, leaf whorl, root; CONTAINS InterPro DOMAIN/s: Glycoside hydrolase, family 19 (InterPro:IPR016283), Glycoside hydrolase, family 19, catalytic (InterPro:IPR000726); BEST Arabidopsis thalian…	0	1	TAIR10	471990	473160	-	0	0	0
1	479279	483448	MACS_peak_25	518.27	AT1G02390	protein_coding_gene	glycerol-3-phosphate acyltransferase 2	putative sn-glycerol-3-phosphate 2-O-acyltransferase	glycerol-3-phosphate acyltransferase 2 (GPAT2); FUNCTIONS IN: acyltransferase activity; INVOLVED IN: metabolic process; EXPRESSED IN: 13 plant structures; EXPRESSED DURING: 8 growth stages; CONTAINS InterPro DOMAIN/s: Phospholipid/glycerol acyltransferase (InterPro:IPR002123); BEST Arabidopsis thaliana protein match is: glycerol-3-phosphate acyltransferase 3 (TAIR:AT4G01950.1); Has 367 Blast hits…	0	1	TAIR10	480852	483292	+	0	2	2
1	489625	490656	MACS_peak_26	243.22	AT1G02405	protein_coding_gene	proline-rich family protein	---	proline-rich family protein; BEST Arabidopsis thaliana protein match is: proline-rich family protein (TAIR:AT1G70990.1); Has 45319 Blast hits to 18313 proteins in 1048 species: Archae - 86; Bacteria - 6513; Metazoa - 15272; Fungi - 3775; Plants - 11142; Viruses - 2024; Other Eukaryotes - 6507 (source: NCBI BLink).	0	1	TAIR10	489979	490505	-	0	1	0
1	497933	498697	MACS_peak_27	50.43	AT1G02450	protein_coding_gene	NIM1-interacting 1	NIMIN1 modulates PR gene expression according the following model: NPR1 forms a ternary complex with NIMIN1 and TGA factors upon SAR induction that binds to a positive regulatory cis-element of the PR-1 promoter, termed LS7. This leads to PR-1 gene induction. NIMIN1 decreases transcriptional activation, possibly through its EAR motif, which results in fine-tuning of PR-1 gene expression.	NIM1-interacting 1 (NIMIN1); FUNCTIONS IN: protein binding; INVOLVED IN: regulation of systemic acquired resistance, defense response to bacterium, negative regulation of transcription; LOCATED IN: nucleus; EXPRESSED IN: 20 plant structures; EXPRESSED DURING: 13 growth stages; BEST Arabidopsis thaliana protein match is: systemic acquired resistance (SAR) regulator protein NIMIN-1-related (TAIR:AT…	0	1	TAIR10	497976	498516	-	0	0	0
1	502275	503647	MACS_peak_28	206.01	---	---	---	---	---	---	---	---	---	---	---	1	0	0
1	536452	537261	MACS_peak_29	98.76	AT1G02550	protein_coding_gene	Plant invertase/pectin methylesterase inhibitor superfamily protein	---	Plant invertase/pectin methylesterase inhibitor superfamily protein; FUNCTIONS IN: enzyme inhibitor activity, pectinesterase inhibitor activity, pectinesterase activity; INVOLVED IN: biological_process unknown; LOCATED IN: endomembrane system; CONTAINS InterPro DOMAIN/s: Pectinesterase inhibitor (InterPro:IPR006501); BEST Arabidopsis thaliana protein match is: Plant invertase/pectin methylesteras…	0	1	TAIR10	536483	537211	+	0	0	0
1	545338	549515	MACS_peak_30	436.23	AT1G02580	protein_coding_gene	SET domain-containing protein	Encodes a putative transcription factor MEDEA (MEA) that negatively regulates seed development in the absence of fertilization. Mutations in this locus result in embryo lethality. MEA is a Polycomb group gene that is imprinted in the endosperm. The maternal allele is expressed and the paternal allele is silent. MEA is controlled by DEMETER (DME), a DNA glycosylase required to activate MEA express…	MEDEA (MEA); CONTAINS InterPro DOMAIN/s: SANT, DNA-binding (InterPro:IPR001005), SET domain (InterPro:IPR001214); BEST Arabidopsis thaliana protein match is: SET domain-containing protein (TAIR:AT4G02020.1); Has 4870 Blast hits to 4762 proteins in 465 species: Archae - 0; Bacteria - 401; Metazoa - 1924; Fungi - 484; Plants - 1009; Viruses - 0; Other Eukaryotes - 1052 (source: NCBI BLink).	0	1	TAIR10	544783	549202	+	1	3	0
1	557129	558938	MACS_peak_31	553.73	AT1G02620	protein_coding_gene	Ras-related small GTP-binding family protein	---	Ras-related small GTP-binding family protein; FUNCTIONS IN: GTP binding; INVOLVED IN: intracellular protein transport; LOCATED IN: endomembrane system, intracellular; CONTAINS InterPro DOMAIN/s: Small GTPase SAR1-type (InterPro:IPR006687), ARF/SAR superfamily (InterPro:IPR006689); BEST Arabidopsis thaliana protein match is: secretion-associated RAS super family 2 (TAIR:AT4G02080.1); Has 4733 Blas…	0	1	TAIR10	557092	557986	+	0	1	1
1	582241	583976	MACS_peak_32	348	AT1G02680	protein_coding_gene	TBP-associated factor 13	Encodes a TBP-Associated Factor (TAF) that functions together with PRC2 in transcriptional regulation during seed development.	TBP-associated factor 13 (TAF13); FUNCTIONS IN: RNA polymerase II transcription factor activity, DNA binding; INVOLVED IN: transcription initiation, transcription from RNA polymerase II promoter; LOCATED IN: transcription factor complex; EXPRESSED IN: 23 plant structures; EXPRESSED DURING: 13 growth stages; CONTAINS InterPro DOMAIN/s: Transcription initiation factor IID, 18kDa subunit (InterPro:I…	0	1	TAIR10	580625	582310	+	0	2	0
1	604813	606838	MACS_peak_33	493.28	AT1G02770	protein_coding_gene	Protein of unknown function (DUF626)	---	Protein of unknown function (DUF626); CONTAINS InterPro DOMAIN/s: Protein of unknown function DUF626, Arabidopsis thaliana (InterPro:IPR006462); BEST Arabidopsis thaliana protein match is: Protein of unknown function (DUF626) (TAIR:AT1G19060.1); Has 209 Blast hits to 208 proteins in 2 species: Archae - 0; Bacteria - 0; Metazoa - 0; Fungi - 0; Plants - 209; Viruses - 0; Other Eukaryotes - 0 (sourc…	0	1	TAIR10	604873	606693	-	1	1	0
1	610439	612438	MACS_peak_34	449.83	AT1G02790	protein_coding_gene	polygalacturonase 4	encodes a exopolygalacturonase.	polygalacturonase 4 (PGA4); FUNCTIONS IN: polygalacturonase activity; INVOLVED IN: carbohydrate metabolic process; LOCATED IN: endomembrane system; EXPRESSED IN: 14 plant structures; EXPRESSED DURING: 6 growth stages; CONTAINS InterPro DOMAIN/s: Pectin lyase fold/virulence factor (InterPro:IPR011050), Pectin lyase fold (InterPro:IPR012334), Glycoside hydrolase, family 28 (InterPro:IPR000743), Par…	0	1	TAIR10	610391	612324	-	0	0	0
1	617849	621274	MACS_peak_35	421.92	AT1G02813	protein_coding_gene	Protein of unknown function, DUF538	---	Protein of unknown function, DUF538; INVOLVED IN: biological_process unknown; LOCATED IN: endomembrane system; EXPRESSED IN: leaf whorl, cauline leaf, sepal, flower, seed; EXPRESSED DURING: F mature embryo stage, petal differentiation and expansion stage, E expanded cotyledon stage; CONTAINS InterPro DOMAIN/s: Protein of unknown function DUF538 (InterPro:IPR007493); BEST Arabidopsis thaliana prot…	0	1	TAIR10	620678	621289	+	0	3	0
1	665117	666661	MACS_peak_36	204.24	AT1G02952	other_RNA	other RNA	Potential natural antisense gene, locus overlaps with AT1G02950	---	0	1	TAIR10	665354	666367	+	0	0	0
1	697760	700269	MACS_peak_37	423.4	AT1G03022	protein_coding_gene	---	---	unknown protein; Has 30201 Blast hits to 17322 proteins in 780 species: Archae - 12; Bacteria - 1396; Metazoa - 17338; Fungi - 3422; Plants - 5037; Viruses - 0; Other Eukaryotes - 2996 (source: NCBI BLink).	0	1	TAIR10	699121	699246	+	0	2	0
1	748107	749140	MACS_peak_38	174.49	AT1G03106	protein_coding_gene	---	---	unknown protein; Has 35333 Blast hits to 34131 proteins in 2444 species: Archae - 798; Bacteria - 22429; Metazoa - 974; Fungi - 991; Plants - 531; Viruses - 0; Other Eukaryotes - 9610 (source: NCBI BLink).	0	1	TAIR10	748102	749034	-	0	1	0
1	769811	770671	MACS_peak_39	86.58	AT1G03170	protein_coding_gene	Protein of unknown function (DUF3049)	A member of the FAF family proteins encoded by the FANTASTIC FOUR (FAF) genes: AT4G02810 (FAF1), AT1G03170 (FAF2), AT5G19260 (FAF3) and AT3G06020 (FAF4). FAFs have the potential to regulate shoot meristem size in Arabidopsis thaliana. FAFs can repress WUS, which ultimately leads to an arrest of meristem activity in FAF overexpressing lines.	Protein of unknown function (DUF3049); CONTAINS InterPro DOMAIN/s: Protein of unknown function DUF3049 (InterPro:IPR021410); BEST Arabidopsis thaliana protein match is: Protein of unknown function (DUF3049) (TAIR:AT4G02810.1); Has 91 Blast hits to 91 proteins in 14 species: Archae - 0; Bacteria - 0; Metazoa - 0; Fungi - 2; Plants - 89; Viruses - 0; Other Eukaryotes - 0 (source: NCBI BLink).	0	1	TAIR10	769632	770684	+	0	0	0
1	771727	773231	MACS_peak_40	306.17	AT1G03180	protein_coding_gene	---	---	unknown protein; Has 36 Blast hits to 36 proteins in 15 species: Archae - 0; Bacteria - 0; Metazoa - 3; Fungi - 0; Plants - 33; Viruses - 0; Other Eukaryotes - 0 (source: NCBI BLink).	-180	1	TAIR10	773411	775344	+	0	0	0
1	843106	843974	MACS_peak_41	50.94	AT1G03400	protein_coding_gene	2-oxoglutarate (2OG) and Fe(II)-dependent oxygenase superfamily protein	A single copy gene that encodes a protein with sequence similarity to tomato E8 (ACC oxidase, the last step in ethylene biosynthesis) involved in ethylene synthesis and fruit ripening in tomato. This gene is not induced by ethylene in siliques. The transcript is found in siliques, etiolated seedlings, leaves, stems and flowers.	2-oxoglutarate (2OG) and Fe(II)-dependent oxygenase superfamily protein; CONTAINS InterPro DOMAIN/s: Oxoglutarate/iron-dependent oxygenase (InterPro:IPR005123); BEST Arabidopsis thaliana protein match is: 2-oxoglutarate (2OG) and Fe(II)-dependent oxygenase superfamily protein (TAIR:AT1G03410.1); Has 8186 Blast hits to 8162 proteins in 1002 species: Archae - 0; Bacteria - 1123; Metazoa - 116; Fung…	0	1	TAIR10	842747	844190	-	0	0	0
1	855591	859842	MACS_peak_42	425.06	AT1G03445	protein_coding_gene	Serine/threonine protein phosphatase family protein	encodes a serine?threonine protein phosphatase with an N-terminal Kelch-repeat domain, which is nuclear localized and expressed preferentially in elongating cells. Genetic evidence suggest that this gene plays a redundant role (along with other members of the same gene family) in modulating growth in response to brassinosteroid.	BRI1 SUPPRESSOR 1 (BSU1); FUNCTIONS IN: protein binding, protein serine/threonine phosphatase activity; INVOLVED IN: brassinosteroid mediated signaling pathway, regulation of protein localization; LOCATED IN: nucleus; EXPRESSED IN: sperm cell, male gametophyte, cultured cell, pollen tube; EXPRESSED DURING: L mature pollen stage, M germinated pollen stage; CONTAINS InterPro DOMAIN/s: Serine/threon…	0	1	TAIR10	854410	859701	-	0	1	0
1	871574	873055	MACS_peak_43	913.87	AT1G03490	protein_coding_gene	NAC domain containing protein 6	---	NAC domain containing protein 6 (NAC006); FUNCTIONS IN: sequence-specific DNA binding transcription factor activity; INVOLVED IN: multicellular organismal development, regulation of transcription; EXPRESSED IN: cultured cell; CONTAINS InterPro DOMAIN/s: No apical meristem (NAM) protein (InterPro:IPR003441); BEST Arabidopsis thaliana protein match is: TCV-interacting protein (TAIR:AT5G24590.2); Ha…	0	1	TAIR10	871874	872906	+	0	1	0
1	922288	929824	MACS_peak_44	146.58	AT1G03720	protein_coding_gene	Cysteine proteinases superfamily protein	---	Cysteine proteinases superfamily protein; FUNCTIONS IN: cysteine-type peptidase activity; INVOLVED IN: proteolysis; LOCATED IN: cellular_component unknown; EXPRESSED IN: ovule, seed; EXPRESSED DURING: E expanded cotyledon stage; CONTAINS InterPro DOMAIN/s: Peptidase C1A, papain (InterPro:IPR013128), Peptidase C1A, papain C-terminal (InterPro:IPR000668); BEST Arabidopsis thaliana protein match is:…	0	1	TAIR10	924996	926373	-	1	4	1
1	952111	956239	MACS_peak_45	145.02	AT1G03790	protein_coding_gene	Zinc finger C-x8-C-x5-C-x3-H type family protein	Encodes SOMNUS (SOM), a nucleus-localized CCCH-type zinc finger protein. SOM negatively regulates light-dependent seed germination downstream of PIL5 (AT2G20180).	SOMNUS (SOM); CONTAINS InterPro DOMAIN/s: Zinc finger, CCCH-type (InterPro:IPR000571); BEST Arabidopsis thaliana protein match is: Zinc finger C-x8-C-x5-C-x3-H type family protein (TAIR:AT5G44260.1); Has 3270 Blast hits to 1059 proteins in 150 species: Archae - 0; Bacteria - 0; Metazoa - 444; Fungi - 30; Plants - 421; Viruses - 3; Other Eukaryotes - 2372 (source: NCBI BLink).	0	1	TAIR10	954525	956097	+	1	3	0
1	966756	970723	MACS_peak_46	372.03	AT1G03830	protein_coding_gene	guanylate-binding family protein	---	guanylate-binding family protein; FUNCTIONS IN: GTP binding, GTPase activity; INVOLVED IN: immune response; LOCATED IN: cellular_component unknown; EXPRESSED IN: 12 plant structures; EXPRESSED DURING: 6 growth stages; CONTAINS InterPro DOMAIN/s: Guanylate-binding protein, N-terminal (InterPro:IPR015894), Guanylate-binding protein, C-terminal (InterPro:IPR003191); BEST Arabidopsis thaliana protein…	0	1	TAIR10	962016	966757	-	0	1	1
1	977089	977853	MACS_peak_47	89.63	AT1G03850	protein_coding_gene	Glutaredoxin family protein	Encodes glutaredoxin ATGRXS13, required to facilitate Botrytis cinerea infection of Arabidopsis thaliana plants. Sylvain La Camera et al (2011, PMID:21756272) reported a third splice variant in addition to the two annotated in TAIR10.	Glutaredoxin family protein; FUNCTIONS IN: electron carrier activity, protein disulfide oxidoreductase activity; INVOLVED IN: response to cytokinin stimulus; EXPRESSED IN: 14 plant structures; EXPRESSED DURING: 9 growth stages; CONTAINS InterPro DOMAIN/s: Glutaredoxin-like, plant II (InterPro:IPR011905), Thioredoxin fold (InterPro:IPR012335), Glutaredoxin (InterPro:IPR002109), Thioredoxin-like fo…	0	1	TAIR10	976097	977761	-	0	1	0
1	985428	988221	MACS_peak_48	225.02	AT1G03880	protein_coding_gene	cruciferin 2	Protein is tyrosine-phosphorylated and its phosphorylation state is modulated in response to ABA in Arabidopsis thaliana seeds.	cruciferin 2 (CRU2); FUNCTIONS IN: nutrient reservoir activity; INVOLVED IN: seed germination, response to abscisic acid stimulus; LOCATED IN: endomembrane system; EXPRESSED IN: leaf, seed; EXPRESSED DURING: seedling growth, seed development stages; CONTAINS InterPro DOMAIN/s: 11-S seed storage protein, conserved site (InterPro:IPR022379), Cupin, RmlC-type (InterPro:IPR011051), Cupin 1 (InterPro:…	0	1	TAIR10	985751	988146	+	0	0	1
1	988305	990378	MACS_peak_49	67.98	AT1G03890	protein_coding_gene	RmlC-like cupins superfamily protein	---	RmlC-like cupins superfamily protein; FUNCTIONS IN: nutrient reservoir activity; INVOLVED IN: biological_process unknown; LOCATED IN: endomembrane system; EXPRESSED IN: leaf, seed; EXPRESSED DURING: seed development stages; CONTAINS InterPro DOMAIN/s: Cupin, RmlC-type (InterPro:IPR011051), Cupin 1 (InterPro:IPR006045), RmlC-like jelly roll fold (InterPro:IPR014710), 11-S seed storage protein, pla…	0	1	TAIR10	989198	991020	+	1	0	0
1	1022688	1023671	MACS_peak_50	67.01	AT1G03982	protein_coding_gene	PAK-box/P21-Rho-binding family protein	---	PAK-box/P21-Rho-binding family protein; CONTAINS InterPro DOMAIN/s: PAK-box/P21-Rho-binding (InterPro:IPR000095); BEST Arabidopsis thaliana protein match is: PAK-box/P21-Rho-binding family protein (TAIR:AT4G28556.1); Has 35333 Blast hits to 34131 proteins in 2444 species: Archae - 798; Bacteria - 22429; Metazoa - 974; Fungi - 991; Plants - 531; Viruses - 0; Other Eukaryotes - 9610 (source: NCBI B…	0	1	TAIR10	1022251	1023719	-	0	0	0
1	1081829	1084510	MACS_peak_51	456.73	AT1G04150	protein_coding_gene	C2 calcium/lipid-binding plant phosphoribosyltransferase family protein	---	C2 calcium/lipid-binding plant phosphoribosyltransferase family protein; CONTAINS InterPro DOMAIN/s: C2 membrane targeting protein (InterPro:IPR018029), C2 calcium/lipid-binding domain, CaLB (InterPro:IPR008973), Phosphoribosyltransferase C-terminal (InterPro:IPR013583), C2 calcium-dependent membrane targeting (InterPro:IPR000008); BEST Arabidopsis thaliana protein match is: C2 calcium/lipid-bind…	0	1	TAIR10	1081208	1084246	-	0	2	0
1	1102015	1103270	MACS_peak_52	92.75	---	---	---	---	---	---	---	---	---	---	---	1	0	0
1	1104656	1105838	MACS_peak_53	109.21	AT1G04180	protein_coding_gene	YUCCA 9	---	YUCCA 9 (YUC9); FUNCTIONS IN: NADP or NADPH binding, oxidoreductase activity, monooxygenase activity, FAD binding, flavin-containing monooxygenase activity; INVOLVED IN: oxidation reduction; EXPRESSED IN: root; CONTAINS InterPro DOMAIN/s: Pyridine nucleotide-disulphide oxidoreductase, class-II (InterPro:IPR000103), FAD-dependent pyridine nucleotide-disulphide oxidoreductase (InterPro:IPR013027), …	0	1	TAIR10	1104623	1105988	+	0	0	0
1	1119722	1121089	MACS_peak_54	100.06	AT1G04220	protein_coding_gene	3-ketoacyl-CoA synthase 2	Encodes KCS2, a member of the 3-ketoacyl-CoA synthase family involved in the biosynthesis of VLCFA (very long chain fatty acids).	3-ketoacyl-CoA synthase 2 (KCS2); FUNCTIONS IN: fatty acid elongase activity; INVOLVED IN: response to wounding, response to osmotic stress, suberin biosynthetic process; LOCATED IN: membrane; EXPRESSED IN: 17 plant structures; EXPRESSED DURING: 6 growth stages; CONTAINS InterPro DOMAIN/s: Thiolase-like (InterPro:IPR016039), Very-long-chain 3-ketoacyl-CoA synthase (InterPro:IPR012392), 3-Oxoacyl-…	0	1	TAIR10	1119699	1122526	-	0	1	0
1	1121374	1122816	MACS_peak_55	196.55	AT1G04220	protein_coding_gene	3-ketoacyl-CoA synthase 2	Encodes KCS2, a member of the 3-ketoacyl-CoA synthase family involved in the biosynthesis of VLCFA (very long chain fatty acids).	3-ketoacyl-CoA synthase 2 (KCS2); FUNCTIONS IN: fatty acid elongase activity; INVOLVED IN: response to wounding, response to osmotic stress, suberin biosynthetic process; LOCATED IN: membrane; EXPRESSED IN: 17 plant structures; EXPRESSED DURING: 6 growth stages; CONTAINS InterPro DOMAIN/s: Thiolase-like (InterPro:IPR016039), Very-long-chain 3-ketoacyl-CoA synthase (InterPro:IPR012392), 3-Oxoacyl-…	0	1	TAIR10	1119699	1122526	-	0	0	0
1	1136032	1138812	MACS_peak_56	356.16	AT1G04250	protein_coding_gene	AUX/IAA transcriptional regulator family protein	Transcription regulator acting as repressor of auxin-inducible gene expression. Auxin-inducible AUX/IAA gene. Short-lived nuclear protein with four conserved domains. Domain III has homology to beta alpha alpha dimerization and DNA binding domains. Involved in auxin signaling. Auxin induces the degradation of the protein in a dosage-dependent manner in a process mediated by AtRac1. Auxin induced …	AUXIN RESISTANT 3 (AXR3); CONTAINS InterPro DOMAIN/s: Aux/IAA-ARF-dimerisation (InterPro:IPR011525), AUX/IAA protein (InterPro:IPR003311); BEST Arabidopsis thaliana protein match is: indole-3-acetic acid inducible 14 (TAIR:AT4G14550.1); Has 1763 Blast hits to 1762 proteins in 78 species: Archae - 0; Bacteria - 0; Metazoa - 0; Fungi - 0; Plants - 1762; Viruses - 0; Other Eukaryotes - 1 (source: NC…	0	1	TAIR10	1136258	1138613	+	0	1	0
1	1144483	1145173	MACS_peak_57	64.79	AT1G04280	protein_coding_gene	P-loop containing nucleoside triphosphate hydrolases superfamily protein	---	P-loop containing nucleoside triphosphate hydrolases superfamily protein; FUNCTIONS IN: ATP binding; INVOLVED IN: cell killing; LOCATED IN: membrane; EXPRESSED IN: leaf; CONTAINS InterPro DOMAIN/s: Zeta toxin (InterPro:IPR010488); BEST Arabidopsis thaliana protein match is: P-loop containing nucleoside triphosphate hydrolases superfamily protein (TAIR:AT1G06750.2); Has 195 Blast hits to 194 prote…	0	1	TAIR10	1143436	1146654	-	0	0	0
1	1159167	1160006	MACS_peak_58	69.02	---	---	---	---	---	---	---	---	---	---	---	0	0	0
1	1161235	1162276	MACS_peak_59	162.76	AT1G04330	protein_coding_gene	---	---	unknown protein; FUNCTIONS IN: molecular_function unknown; INVOLVED IN: biological_process unknown; LOCATED IN: chloroplast; BEST Arabidopsis thaliana protein match is: unknown protein (TAIR:AT3G23170.1); Has 74 Blast hits to 74 proteins in 6 species: Archae - 0; Bacteria - 0; Metazoa - 0; Fungi - 0; Plants - 74; Viruses - 0; Other Eukaryotes - 0 (source: NCBI BLink).	0	1	TAIR10	1161311	1161982	-	0	1	0
1	1174798	1176122	MACS_peak_60	541.89	AT1G04370	protein_coding_gene	Ethylene-responsive element binding factor 14	encodes a member of the ERF (ethylene response factor) subfamily B-3 of ERF/AP2 transcription factor family. The protein contains one AP2 domain. There are 18 members in this subfamily including ATERF-1, ATERF-2, AND ATERF-5.	Ethylene-responsive element binding factor 14 (ERF14); CONTAINS InterPro DOMAIN/s: DNA-binding, integrase-type (InterPro:IPR016177), Pathogenesis-related transcriptional factor/ERF, DNA-binding (InterPro:IPR001471); BEST Arabidopsis thaliana protein match is: Integrase-type DNA-binding superfamily protein (TAIR:AT5G43410.1); Has 6105 Blast hits to 5744 proteins in 253 species: Archae - 0; Bacteri…	0	1	TAIR10	1175177	1175578	+	0	0	0
1	1207037	1210858	MACS_peak_61	532.61	AT1G04450	protein_coding_gene	ROP-interactive CRIB motif-containing protein 3	Encodes a member of a novel protein family that contains contain a CRIB (for Cdc42/Rac-interactive binding) motif required for their specific interaction with GTP-bound Rop1 (plant-specific Rho GTPase). It interacts with Rop1 and is involved in pollen tube growth and function, and exocytosis in the pollen tube tip. The protein most similar to RIC1 (family subgroup III). Gene is expressed predomin…	ROP-interactive CRIB motif-containing protein 3 (RIC3); FUNCTIONS IN: protein binding; INVOLVED IN: in 7 processes; LOCATED IN: cytoplasm; CONTAINS InterPro DOMAIN/s: PAK-box/P21-Rho-binding (InterPro:IPR000095); BEST Arabidopsis thaliana protein match is: ROP-interactive CRIB motif-containing protein 1 (TAIR:AT2G33460.1); Has 189 Blast hits to 189 proteins in 25 species: Archae - 0; Bacteria - 0…	0	1	TAIR10	1208521	1209874	+	1	2	1
1	1221422	1224634	MACS_peak_62	310.46	AT1G04501	protein_coding_gene	---	---	unknown protein; Has 30201 Blast hits to 17322 proteins in 780 species: Archae - 12; Bacteria - 1396; Metazoa - 17338; Fungi - 3422; Plants - 5037; Viruses - 0; Other Eukaryotes - 2996 (source: NCBI BLink).	0	1	TAIR10	1224552	1224680	+	0	0	0
1	1244448	1246320	MACS_peak_63	503.97	AT1G04560	protein_coding_gene	AWPM-19-like family protein	---	AWPM-19-like family protein; FUNCTIONS IN: molecular_function unknown; INVOLVED IN: biological_process unknown; LOCATED IN: endomembrane system; CONTAINS InterPro DOMAIN/s: AWPM-19-like (InterPro:IPR008390); BEST Arabidopsis thaliana protein match is: AWPM-19-like family protein (TAIR:AT5G46530.1); Has 177 Blast hits to 177 proteins in 19 species: Archae - 0; Bacteria - 0; Metazoa - 0; Fungi - 0;…	0	1	TAIR10	1244947	1246059	+	0	0	0
1	1270502	1272679	MACS_peak_64	220.89	AT1G04600	protein_coding_gene	myosin XI A	member of Myosin-like proteins	myosin XI A (XIA); FUNCTIONS IN: motor activity; INVOLVED IN: actin filament-based movement; LOCATED IN: myosin complex; EXPRESSED IN: 18 plant structures; EXPRESSED DURING: 9 growth stages; CONTAINS InterPro DOMAIN/s: Dil domain (InterPro:IPR018444), Dilute (InterPro:IPR002710), Prefoldin (InterPro:IPR009053), Myosin, N-terminal, SH3-like (InterPro:IPR004009), Myosin head, motor domain (InterPro…	0	1	TAIR10	1262123	1272376	+	0	1	0
1	1287125	1289061	MACS_peak_65	565.63	AT1G04625	protein_coding_gene	Polynucleotidyl transferase, ribonuclease H-like superfamily protein	---	Polynucleotidyl transferase, ribonuclease H-like superfamily protein; FUNCTIONS IN: nucleic acid binding; INVOLVED IN: biological_process unknown; LOCATED IN: cellular_component unknown; CONTAINS InterPro DOMAIN/s: Polynucleotidyl transferase, ribonuclease H fold (InterPro:IPR012337); BEST Arabidopsis thaliana protein match is: Polynucleotidyl transferase, ribonuclease H-like superfamily protein …	0	1	TAIR10	1287831	1289820	-	0	1	0
1	1299528	1302985	MACS_peak_66	845.49	AT1G04670	protein_coding_gene	---	---	unknown protein; Has 40 Blast hits to 40 proteins in 14 species: Archae - 2; Bacteria - 5; Metazoa - 1; Fungi - 2; Plants - 30; Viruses - 0; Other Eukaryotes - 0 (source: NCBI BLink).	0	1	TAIR10	1301861	1302724	+	1	2	0
1	1458943	1461000	MACS_peak_67	553.01	AT1G05085	protein_coding_gene	---	---	unknown protein; Has 35333 Blast hits to 34131 proteins in 2444 species: Archae - 798; Bacteria - 22429; Metazoa - 974; Fungi - 991; Plants - 531; Viruses - 0; Other Eukaryotes - 9610 (source: NCBI BLink).	0	1	TAIR10	1460988	1461670	+	0	1	0
1	1480108	1481868	MACS_peak_68	223.23	AT1G05140	protein_coding_gene	Peptidase M50 family protein	---	Peptidase M50 family protein; FUNCTIONS IN: metalloendopeptidase activity; INVOLVED IN: proteolysis; LOCATED IN: chloroplast, plastid; EXPRESSED IN: 22 plant structures; EXPRESSED DURING: 13 growth stages; CONTAINS InterPro DOMAIN/s: Peptidase M50 (InterPro:IPR008915), PDZ/DHR/GLGF (InterPro:IPR001478), Peptidase M50, putative membrane-associated zinc metallopeptidase (InterPro:IPR004387); BEST A…	-680	1	TAIR10	1482548	1484056	+	0	0	0
1	1516236	1518113	MACS_peak_69	221.67	AT1G05230	protein_coding_gene	homeodomain GLABROUS 2	Encodes a homeobox-leucine zipper family protein belonging to the HD-ZIP IV family. Mutants have trichomes that appear glass-like under a dissecting microscope as compared to the wild-type trichomes. The mutations do not affect trichome growth or branch number.	homeodomain GLABROUS 2 (HDG2); FUNCTIONS IN: DNA binding, sequence-specific DNA binding transcription factor activity; INVOLVED IN: regulation of transcription, DNA-dependent, trichome morphogenesis; LOCATED IN: nucleus; EXPRESSED IN: 32 plant structures; EXPRESSED DURING: 15 growth stages; CONTAINS InterPro DOMAIN/s: Homeobox, conserved site (InterPro:IPR017970), Homeobox (InterPro:IPR001356), H…	0	1	TAIR10	1512896	1518805	-	0	1	0
1	1529668	1530801	MACS_peak_70	134.59	AT1G05260	protein_coding_gene	Peroxidase superfamily protein	Encodes a cold-inducible cationic peroxidase that is involved in the stress response. In response to low temperature, RCI3 transcripts accumulate in the aerial part and in roots of etiolated seedlings but only in roots of light-grown seedlings.	RARE COLD INDUCIBLE GENE 3 (RCI3); FUNCTIONS IN: peroxidase activity; INVOLVED IN: response to desiccation, response to cold, hyperosmotic salinity response; LOCATED IN: endoplasmic reticulum; EXPRESSED IN: 12 plant structures; EXPRESSED DURING: 4 anthesis, petal differentiation and expansion stage, E expanded cotyledon stage; CONTAINS InterPro DOMAIN/s: Haem peroxidase (InterPro:IPR010255), Plan…	0	1	TAIR10	1529767	1531439	+	0	0	0
1	1534870	1538003	MACS_peak_71	186.6	AT1G05280	protein_coding_gene	Protein of unknown function (DUF604)	---	Protein of unknown function (DUF604); CONTAINS InterPro DOMAIN/s: Protein of unknown function DUF604 (InterPro:IPR006740); BEST Arabidopsis thaliana protein match is: Protein of unknown function (DUF604) (TAIR:AT4G15240.1); Has 523 Blast hits to 513 proteins in 78 species: Archae - 0; Bacteria - 0; Metazoa - 61; Fungi - 172; Plants - 273; Viruses - 0; Other Eukaryotes - 17 (source: NCBI BLink).	0	1	TAIR10	1535444	1537525	-	0	3	0
1	1538050	1542602	MACS_peak_72	164.55	AT1G05290	protein_coding_gene	CCT motif family protein	---	CCT motif family protein; CONTAINS InterPro DOMAIN/s: CCT domain (InterPro:IPR010402); BEST Arabidopsis thaliana protein match is: B-box type zinc finger protein with CCT domain (TAIR:AT3G21880.1); Has 1471 Blast hits to 1456 proteins in 101 species: Archae - 0; Bacteria - 2; Metazoa - 0; Fungi - 0; Plants - 1426; Viruses - 0; Other Eukaryotes - 43 (source: NCBI BLink).	0	1	TAIR10	1539152	1540562	-	1	5	0
1	1548612	1553593	MACS_peak_73	166.01	AT1G05310	protein_coding_gene	Pectin lyase-like superfamily protein	---	Pectin lyase-like superfamily protein; FUNCTIONS IN: pectinesterase activity; INVOLVED IN: cell wall modification; LOCATED IN: endomembrane system, cell wall, plant-type cell wall; EXPRESSED IN: 12 plant structures; EXPRESSED DURING: 6 growth stages; CONTAINS InterPro DOMAIN/s: Pectinesterase, active site (InterPro:IPR018040), Pectin lyase fold/virulence factor (InterPro:IPR011050), Pectinesteras…	0	1	TAIR10	1550543	1552517	-	0	2	0
1	1571268	1572690	MACS_peak_74	245.74	AT1G05370	protein_coding_gene	Sec14p-like phosphatidylinositol transfer family protein	---	Sec14p-like phosphatidylinositol transfer family protein; CONTAINS InterPro DOMAIN/s: Cellular retinaldehyde-binding/triple function, C-terminal (InterPro:IPR001251), Phosphatidylinositol transfer protein-like, N-terminal (InterPro:IPR011074); BEST Arabidopsis thaliana protein match is: Sec14p-like phosphatidylinositol transfer family protein (TAIR:AT3G22410.1); Has 487 Blast hits to 487 proteins…	0	1	TAIR10	1569192	1572280	-	0	1	0
1	1583996	1585568	MACS_peak_75	220.11	AT1G05410	protein_coding_gene	Protein of unknown function (DUF1423)	---	Protein of unknown function (DUF1423); CONTAINS InterPro DOMAIN/s: Protein of unknown function DUF1423, plant (InterPro:IPR004082); BEST Arabidopsis thaliana protein match is: unknown protein (TAIR:AT4G14840.1); Has 192 Blast hits to 189 proteins in 31 species: Archae - 0; Bacteria - 0; Metazoa - 2; Fungi - 10; Plants - 173; Viruses - 0; Other Eukaryotes - 7 (source: NCBI BLink).	0	1	TAIR10	1585371	1587778	-	0	1	0
1	1589704	1591189	MACS_peak_76	211.26	AT1G05420	protein_coding_gene	ovate family protein 12	---	ovate family protein 12 (OFP12); CONTAINS InterPro DOMAIN/s: Protein of unknown function DUF623 (InterPro:IPR006458); BEST Arabidopsis thaliana protein match is: ovate family protein 16 (TAIR:AT2G32100.1); Has 358 Blast hits to 358 proteins in 17 species: Archae - 0; Bacteria - 0; Metazoa - 0; Fungi - 0; Plants - 358; Viruses - 0; Other Eukaryotes - 0 (source: NCBI BLink).	0	1	TAIR10	1590073	1590753	+	0	1	1
1	1591222	1592731	MACS_peak_77	146.38	---	---	---	---	---	---	---	---	---	---	---	0	0	0
1	1599878	1601272	MACS_peak_78	93	AT1G05460	protein_coding_gene	P-loop containing nucleoside triphosphate hydrolases superfamily protein	Encodes a protein with similarity to RNA helicases. Mutants are defective in post-transcriptional gene silencing.	SILENCING DEFECTIVE (SDE3); FUNCTIONS IN: RNA helicase activity; INVOLVED IN: virus induced gene silencing; LOCATED IN: cellular_component unknown; EXPRESSED IN: 19 plant structures; EXPRESSED DURING: 9 growth stages; CONTAINS InterPro DOMAIN/s: Restriction endonuclease, type I, R subunit/Type III, Res subunit (InterPro:IPR006935), DNA helicase, UvrD/REP type (InterPro:IPR000212); BEST Arabidopsi…	0	1	TAIR10	1601148	1605027	-	0	0	0
1	1629231	1630435	MACS_peak_79	189.79	AT1G05510	protein_coding_gene	Protein of unknown function (DUF1264)	Protein is tyrosine-phosphorylated and its phosphorylation state is modulated in response to ABA in Arabidopsis thaliana seeds.	FUNCTIONS IN: molecular_function unknown; INVOLVED IN: response to abscisic acid stimulus; LOCATED IN: cellular_component unknown; EXPRESSED IN: seed; EXPRESSED DURING: seedling growth, seed development stages; CONTAINS InterPro DOMAIN/s: Protein of unknown function DUF1264 (InterPro:IPR010686); BEST Arabidopsis thaliana protein match is: Protein of unknown function (DUF1264) (TAIR:AT2G31985.1); …	0	1	TAIR10	1629446	1630863	+	0	0	0
1	1643607	1644275	MACS_peak_80	81.19	AT1G05550	protein_coding_gene	Protein of unknown function (DUF295)	---	Protein of unknown function (DUF295); BEST Arabidopsis thaliana protein match is: Protein of unknown function (DUF295) (TAIR:AT1G05540.1); Has 175 Blast hits to 175 proteins in 2 species: Archae - 0; Bacteria - 0; Metazoa - 0; Fungi - 0; Plants - 175; Viruses - 0; Other Eukaryotes - 0 (source: NCBI BLink).	0	1	TAIR10	1640959	1643917	-	0	1	0
1	1665295	1666561	MACS_peak_81	155.2	AT1G05580	protein_coding_gene	cation/H+ exchanger 23	member of Putative Na+/H+ antiporter family	cation/H+ exchanger 23 (CHX23); FUNCTIONS IN: monovalent cation:hydrogen antiporter activity, sodium:hydrogen antiporter activity; INVOLVED IN: cation transport; LOCATED IN: integral to membrane; EXPRESSED IN: male gametophyte, leaf; CONTAINS InterPro DOMAIN/s: Cation/H+ exchanger (InterPro:IPR006153); BEST Arabidopsis thaliana protein match is: cation/H+ exchanger 21 (TAIR:AT2G31910.1); Has 6204…	0	1	TAIR10	1665433	1668904	-	1	0	0
1	1666875	1668666	MACS_peak_82	85.93	AT1G05580	protein_coding_gene	cation/H+ exchanger 23	member of Putative Na+/H+ antiporter family	cation/H+ exchanger 23 (CHX23); FUNCTIONS IN: monovalent cation:hydrogen antiporter activity, sodium:hydrogen antiporter activity; INVOLVED IN: cation transport; LOCATED IN: integral to membrane; EXPRESSED IN: male gametophyte, leaf; CONTAINS InterPro DOMAIN/s: Cation/H+ exchanger (InterPro:IPR006153); BEST Arabidopsis thaliana protein match is: cation/H+ exchanger 21 (TAIR:AT2G31910.1); Has 6204…	0	1	TAIR10	1665433	1668904	-	0	0	0
1	1690061	1692609	MACS_peak_83	113.01	AT1G05650	protein_coding_gene	Pectin lyase-like superfamily protein	---	Pectin lyase-like superfamily protein; FUNCTIONS IN: polygalacturonase activity; INVOLVED IN: carbohydrate metabolic process; LOCATED IN: endomembrane system; CONTAINS InterPro DOMAIN/s: Pectin lyase fold/virulence factor (InterPro:IPR011050), Pectin lyase fold (InterPro:IPR012334), Glycoside hydrolase, family 28 (InterPro:IPR000743), Parallel beta-helix repeat (InterPro:IPR006626); BEST Arabidop…	0	1	TAIR10	1690264	1692126	-	0	1	1
1	1693994	1696404	MACS_peak_84	325.71	AT1G05660	protein_coding_gene	Pectin lyase-like superfamily protein	---	Pectin lyase-like superfamily protein; FUNCTIONS IN: polygalacturonase activity; INVOLVED IN: carbohydrate metabolic process; LOCATED IN: endomembrane system; CONTAINS InterPro DOMAIN/s: Pectin lyase fold/virulence factor (InterPro:IPR011050), Pectin lyase fold (InterPro:IPR012334), Glycoside hydrolase, family 28 (InterPro:IPR000743), Parallel beta-helix repeat (InterPro:IPR006626); BEST Arabidop…	0	1	TAIR10	1694286	1696058	-	1	0	0
1	1740720	1743322	MACS_peak_85	784.3	AT1G05800	protein_coding_gene	alpha/beta-Hydrolases superfamily protein	Encodes a galactolipase. Located in the chloroplast. Involved in the initial step of jasmonic acid biosynthesis. Expressed in vegetative tissues and is necessary for the biosynthesis of basal-level JAs in vegetative tissues.	DONGLE (DGL); CONTAINS InterPro DOMAIN/s: Lipase, class 3 (InterPro:IPR002921); BEST Arabidopsis thaliana protein match is: alpha/beta-Hydrolases superfamily protein (TAIR:AT2G31690.1); Has 1183 Blast hits to 1177 proteins in 252 species: Archae - 0; Bacteria - 234; Metazoa - 21; Fungi - 238; Plants - 544; Viruses - 3; Other Eukaryotes - 143 (source: NCBI BLink).	0	1	TAIR10	1741204	1742619	+	0	1	0
1	1847367	1848713	MACS_peak_86	70.24	AT1G06090	protein_coding_gene	Fatty acid desaturase family protein	---	Fatty acid desaturase family protein; FUNCTIONS IN: oxidoreductase activity, oxidoreductase activity, acting on paired donors, with oxidation of a pair of donors resulting in the reduction of molecular oxygen to two molecules of water; INVOLVED IN: oxidation reduction, lipid metabolic process; LOCATED IN: cellular_component unknown; CONTAINS InterPro DOMAIN/s: Fatty acid desaturase, type 1, core …	0	1	TAIR10	1847883	1849693	+	0	0	0
1	1861060	1864086	MACS_peak_87	386.53	AT1G06137	protein_coding_gene	---	---	unknown protein; FUNCTIONS IN: molecular_function unknown; INVOLVED IN: biological_process unknown; LOCATED IN: endomembrane system; BEST Arabidopsis thaliana protein match is: unknown protein (TAIR:AT1G06135.1); Has 30201 Blast hits to 17322 proteins in 780 species: Archae - 12; Bacteria - 1396; Metazoa - 17338; Fungi - 3422; Plants - 5037; Viruses - 0; Other Eukaryotes - 2996 (source: NCBI BLin…	0	1	TAIR10	1863544	1863750	-	0	1	0
1	1919742	1921649	MACS_peak_88	669.85	AT1G06280	protein_coding_gene	LOB domain-containing protein 2	---	LOB domain-containing protein 2 (LBD2); INVOLVED IN: biological_process unknown; LOCATED IN: chloroplast; CONTAINS InterPro DOMAIN/s: Lateral organ boundaries, LOB (InterPro:IPR004883); BEST Arabidopsis thaliana protein match is: Lateral organ boundaries (LOB) domain family protein (TAIR:AT1G65620.4); Has 899 Blast hits to 894 proteins in 25 species: Archae - 0; Bacteria - 0; Metazoa - 0; Fungi -…	0	1	TAIR10	1920307	1920949	-	1	1	0
1	1930190	1932639	MACS_peak_89	250.81	AT1G06330	protein_coding_gene	Heavy metal transport/detoxification superfamily protein	---	Heavy metal transport/detoxification superfamily protein ; FUNCTIONS IN: copper ion binding, metal ion binding; INVOLVED IN: copper ion transport, metal ion transport; LOCATED IN: cellular_component unknown; CONTAINS InterPro DOMAIN/s: Heavy metal transport/detoxification protein (InterPro:IPR006121); BEST Arabidopsis thaliana protein match is: Heavy metal transport/detoxification superfamily pro…	0	1	TAIR10	1931671	1932266	-	0	2	0
1	1933855	1937395	MACS_peak_90	51.66	AT1G06340	protein_coding_gene	Plant Tudor-like protein	---	Plant Tudor-like protein; FUNCTIONS IN: RNA binding; INVOLVED IN: biological_process unknown; LOCATED IN: cellular_component unknown; CONTAINS InterPro DOMAIN/s: Tudor-like, plant (InterPro:IPR014002), Agenet (InterPro:IPR008395); BEST Arabidopsis thaliana protein match is: agenet domain-containing protein (TAIR:AT1G09320.1); Has 263 Blast hits to 216 proteins in 16 species: Archae - 0; Bacteria …	0	1	TAIR10	1933284	1934014	-	0	0	0
1	1939013	1940877	MACS_peak_91	263.24	AT1G06360	protein_coding_gene	Fatty acid desaturase family protein	---	Fatty acid desaturase family protein; FUNCTIONS IN: oxidoreductase activity, oxidoreductase activity, acting on paired donors, with oxidation of a pair of donors resulting in the reduction of molecular oxygen to two molecules of water; INVOLVED IN: oxidation reduction, lipid metabolic process; CONTAINS InterPro DOMAIN/s: Fatty acid desaturase, type 1, core (InterPro:IPR015876), Fatty acid desatur…	0	1	TAIR10	1938963	1940459	-	0	0	1
1	1997331	2000574	MACS_peak_92	330.19	---	---	---	---	---	---	---	---	---	---	---	0	1	0
1	2025406	2026408	MACS_peak_93	147.19	AT1G06620	protein_coding_gene	2-oxoglutarate (2OG) and Fe(II)-dependent oxygenase superfamily protein	encodes a protein whose sequence is similar to a 2-oxoglutarate-dependent dioxygenase	2-oxoglutarate (2OG) and Fe(II)-dependent oxygenase superfamily protein; CONTAINS InterPro DOMAIN/s: Oxoglutarate/iron-dependent oxygenase (InterPro:IPR005123); BEST Arabidopsis thaliana protein match is: 2-oxoglutarate (2OG) and Fe(II)-dependent oxygenase superfamily protein (TAIR:AT3G61400.1); Has 8339 Blast hits to 8299 proteins in 1003 species: Archae - 0; Bacteria - 1128; Metazoa - 122; Fung…	0	1	TAIR10	2025601	2027271	+	0	1	0
1	2090885	2092814	MACS_peak_94	377.89	AT1G06810	protein_coding_gene	---	---	unknown protein; BEST Arabidopsis thaliana protein match is: unknown protein (TAIR:AT1G05400.2); Has 30201 Blast hits to 17322 proteins in 780 species: Archae - 12; Bacteria - 1396; Metazoa - 17338; Fungi - 3422; Plants - 5037; Viruses - 0; Other Eukaryotes - 2996 (source: NCBI BLink).	0	1	TAIR10	2091738	2092528	-	0	1	1
1	2148303	2150475	MACS_peak_95	480.13	AT1G07000	protein_coding_gene	exocyst subunit exo70 family protein B2	A member of EXO70 gene family, putative exocyst subunits, conserved in land plants. Arabidopsis thaliana contains 23 putative EXO70 genes, which can be classified into eight clusters on the phylogenetic tree.	exocyst subunit exo70 family protein B2 (EXO70B2); INVOLVED IN: exocytosis, vesicle docking involved in exocytosis; LOCATED IN: cytosol, nucleus, plasma membrane, exocyst; EXPRESSED IN: 19 plant structures; EXPRESSED DURING: 12 growth stages; CONTAINS InterPro DOMAIN/s: Exo70 exocyst complex subunit (InterPro:IPR004140); BEST Arabidopsis thaliana protein match is: exocyst subunit exo70 family pro…	0	1	TAIR10	2150194	2152325	-	1	1	1
1	2173917	2174992	MACS_peak_96	132.35	AT1G07090	protein_coding_gene	Protein of unknown function (DUF640)	---	LIGHT SENSITIVE HYPOCOTYLS 6 (LSH6); CONTAINS InterPro DOMAIN/s: Protein of unknown function DUF640 (InterPro:IPR006936); BEST Arabidopsis thaliana protein match is: Protein of unknown function (DUF640) (TAIR:AT5G58500.1); Has 311 Blast hits to 311 proteins in 18 species: Archae - 0; Bacteria - 0; Metazoa - 14; Fungi - 0; Plants - 297; Viruses - 0; Other Eukaryotes - 0 (source: NCBI BLink).	0	1	TAIR10	2173952	2174894	-	0	1	0
1	2201900	2203074	MACS_peak_97	177.01	AT1G07175	protein_coding_gene	---	---	unknown protein; FUNCTIONS IN: molecular_function unknown; INVOLVED IN: biological_process unknown; LOCATED IN: endomembrane system; BEST Arabidopsis thaliana protein match is: unknown protein (TAIR:AT2G29995.1); Has 30201 Blast hits to 17322 proteins in 780 species: Archae - 12; Bacteria - 1396; Metazoa - 17338; Fungi - 3422; Plants - 5037; Viruses - 0; Other Eukaryotes - 2996 (source: NCBI BLin…	0	1	TAIR10	2202330	2202774	+	1	0	0
1	2281037	2282992	MACS_peak_98	506.45	AT1G07430	protein_coding_gene	highly ABA-induced PP2C gene 2	Encodes a member of the group A protein phosphatase 2C (PP2C) family that is responsible for negatively regulating seed dormancy.	highly ABA-induced PP2C gene 2 (HAI2); FUNCTIONS IN: protein serine/threonine phosphatase activity, catalytic activity; INVOLVED IN: protein amino acid dephosphorylation; LOCATED IN: protein serine/threonine phosphatase complex; EXPRESSED IN: 17 plant structures; EXPRESSED DURING: 9 growth stages; CONTAINS InterPro DOMAIN/s: Protein phosphatase 2C, manganese/magnesium aspartate binding site (Inte…	0	1	TAIR10	2280835	2282828	-	0	1	1
1	2352696	2358913	MACS_peak_99	286.4	AT1G07640	protein_coding_gene	Dof-type zinc finger DNA-binding family protein	A member of the DOF transcription factors. Prominently expressed in the phloem of leaves and other organs. Expression is induced by wounding, MeJA and insect feeding. Upregulates glucosinolate biosynthesis.	OBP2; CONTAINS InterPro DOMAIN/s: Zinc finger, Dof-type (InterPro:IPR003851); BEST Arabidopsis thaliana protein match is: Dof-type zinc finger DNA-binding family protein (TAIR:AT2G28810.2); Has 1592 Blast hits to 1530 proteins in 87 species: Archae - 0; Bacteria - 4; Metazoa - 20; Fungi - 15; Plants - 1085; Viruses - 0; Other Eukaryotes - 468 (source: NCBI BLink).	0	1	TAIR10	2354354	2356227	-	0	2	1
1	2367426	2368601	MACS_peak_100	503.4	AT1G07645	protein_coding_gene	dessication-induced 1VOC superfamily protein	---	dessication-induced 1VOC superfamily protein (DSI-1VOC); FUNCTIONS IN: catalytic activity; LOCATED IN: endomembrane system; EXPRESSED IN: seed; CONTAINS InterPro DOMAIN/s: Glyoxalase/bleomycin resistance protein/dioxygenase (InterPro:IPR004360); Has 35333 Blast hits to 34131 proteins in 2444 species: Archae - 798; Bacteria - 22429; Metazoa - 974; Fungi - 991; Plants - 531; Viruses - 0; Other Euka…	0	1	TAIR10	2367437	2368385	-	0	1	0
1	2390724	2393365	MACS_peak_101	361.25	AT1G07720	protein_coding_gene	3-ketoacyl-CoA synthase 3	Encodes KCS3, a member of the 3-ketoacyl-CoA synthase family involved in the biosynthesis of VLCFA (very long chain fatty acids).	3-ketoacyl-CoA synthase 3 (KCS3); FUNCTIONS IN: transferase activity, transferring acyl groups other than amino-acyl groups, catalytic activity, acyltransferase activity; INVOLVED IN: response to cold, response to light stimulus, response to osmotic stress; LOCATED IN: endoplasmic reticulum; EXPRESSED IN: 24 plant structures; EXPRESSED DURING: 13 growth stages; CONTAINS InterPro DOMAIN/s: Thiolas…	0	1	TAIR10	2390655	2392453	-	0	1	0
1	2427346	2429596	MACS_peak_102	271.06	AT1G07870	protein_coding_gene	Protein kinase superfamily protein	---	Protein kinase superfamily protein; FUNCTIONS IN: protein serine/threonine kinase activity, protein kinase activity, kinase activity, ATP binding; INVOLVED IN: response to salt stress, N-terminal protein myristoylation; LOCATED IN: plasma membrane; EXPRESSED IN: 24 plant structures; EXPRESSED DURING: 13 growth stages; CONTAINS InterPro DOMAIN/s: Protein kinase, ATP binding site (InterPro:IPR01744…	0	1	TAIR10	2428773	2432057	-	0	0	0
1	2475145	2476297	MACS_peak_103	260.57	AT1G07985	protein_coding_gene	Expressed protein	---	Expressed protein; FUNCTIONS IN: molecular_function unknown; INVOLVED IN: biological_process unknown; LOCATED IN: chloroplast; Has 35333 Blast hits to 34131 proteins in 2444 species: Archae - 798; Bacteria - 22429; Metazoa - 974; Fungi - 991; Plants - 531; Viruses - 0; Other Eukaryotes - 9610 (source: NCBI BLink).	0	1	TAIR10	2475405	2476155	+	0	1	0
1	2516965	2518152	MACS_peak_104	55.08	AT1G08080	protein_coding_gene	alpha carbonic anhydrase 7	---	alpha carbonic anhydrase 7 (ACA7); FUNCTIONS IN: carbonate dehydratase activity, zinc ion binding; INVOLVED IN: one-carbon metabolic process; LOCATED IN: endomembrane system; CONTAINS InterPro DOMAIN/s: Carbonic anhydrase, alpha-class, catalytic domain (InterPro:IPR001148), Carbonic anhydrase, CAH1-like (InterPro:IPR018340), Carbonic anhydrase, alpha-class, conserved site (InterPro:IPR018338); BE…	0	1	TAIR10	2516991	2518546	-	1	0	0
1	2522926	2526303	MACS_peak_105	100.49	AT1G08090	protein_coding_gene	nitrate transporter 2:1	High-affinity nitrate transporter. Up-regulated by nitrate. Functions as a repressor of lateral root initiation independently of nitrate uptake.	nitrate transporter 2:1 (NRT2:1); CONTAINS InterPro DOMAIN/s: Major facilitator superfamily MFS-1 (InterPro:IPR011701), Major facilitator superfamily, general substrate transporter (InterPro:IPR016196); BEST Arabidopsis thaliana protein match is: nitrate transporter 2.2 (TAIR:AT1G08100.1); Has 5150 Blast hits to 5022 proteins in 1376 species: Archae - 45; Bacteria - 4402; Metazoa - 22; Fungi - 27…	0	1	TAIR10	2524076	2526164	+	0	0	1
1	2526905	2529642	MACS_peak_106	53.73	AT1G08100	protein_coding_gene	nitrate transporter 2.2	Encodes a high-affinity nitrate transporter.	nitrate transporter 2.2 (NRT2.2); CONTAINS InterPro DOMAIN/s: Major facilitator superfamily MFS-1 (InterPro:IPR011701), Major facilitator superfamily, general substrate transporter (InterPro:IPR016196); BEST Arabidopsis thaliana protein match is: nitrate transporter 2:1 (TAIR:AT1G08090.1); Has 5331 Blast hits to 5172 proteins in 1398 species: Archae - 41; Bacteria - 4556; Metazoa - 25; Fungi - 29…	0	1	TAIR10	2527170	2529120	-	0	0	0
1	2548636	2550268	MACS_peak_107	180.22	AT1G08135	protein_coding_gene	cation/H+ exchanger 6B	---	cation/H+ exchanger 6B (CHX6B); FUNCTIONS IN: monovalent cation:hydrogen antiporter activity; INVOLVED IN: cation transport; LOCATED IN: integral to membrane; EXPRESSED IN: 14 plant structures; EXPRESSED DURING: 4 anthesis, F mature embryo stage, 4 leaf senescence stage, petal differentiation and expansion stage; CONTAINS InterPro DOMAIN/s: Cation/H+ exchanger (InterPro:IPR006153); BEST Arabidops…	0	1	TAIR10	2548819	2551473	-	0	0	0
1	2553023	2557861	MACS_peak_108	75.27	AT1G08150	protein_coding_gene	Cation/hydrogen exchanger family protein	member of Putative Na+/H+ antiporter family	ATCHX5; FUNCTIONS IN: monovalent cation:hydrogen antiporter activity, sodium:hydrogen antiporter activity; INVOLVED IN: cation transport; LOCATED IN: integral to membrane; EXPRESSED IN: male gametophyte, pollen tube; EXPRESSED DURING: L mature pollen stage, M germinated pollen stage; CONTAINS InterPro DOMAIN/s: Cation/H+ exchanger (InterPro:IPR006153); BEST Arabidopsis thaliana protein match is: …	0	1	TAIR10	2556343	2559074	-	2	0	0
1	2562803	2563891	MACS_peak_109	64.95	AT1G08170	protein_coding_gene	Histone superfamily protein	---	Histone superfamily protein; FUNCTIONS IN: DNA binding; INVOLVED IN: nucleosome assembly; LOCATED IN: nucleus, nucleosome; EXPRESSED IN: sperm cell, male gametophyte, flower, pollen tube; EXPRESSED DURING: L mature pollen stage, M germinated pollen stage, 4 anthesis; CONTAINS InterPro DOMAIN/s: Histone H2B (InterPro:IPR000558), Histone-fold (InterPro:IPR009072), Histone core (InterPro:IPR007125);…	0	1	TAIR10	2562941	2563672	-	0	0	0
1	2610285	2614647	MACS_peak_110	534.76	AT1G08290	protein_coding_gene	WIP domain protein 3	---	WIP domain protein 3 (WIP3); CONTAINS InterPro DOMAIN/s: Zinc finger, C2H2-like (InterPro:IPR015880), Zinc finger, C2H2-type (InterPro:IPR007087); BEST Arabidopsis thaliana protein match is: WIP domain protein 5 (TAIR:AT1G51220.1); Has 40394 Blast hits to 17903 proteins in 213 species: Archae - 0; Bacteria - 0; Metazoa - 38493; Fungi - 119; Plants - 685; Viruses - 0; Other Eukaryotes - 1097 (sour…	0	1	TAIR10	2609996	2613242	-	0	1	0
1	2623196	2625049	MACS_peak_111	150.82	AT1G08320	protein_coding_gene	bZIP transcription factor family protein	---	bZIP transcription factor family protein; FUNCTIONS IN: DNA binding, sequence-specific DNA binding transcription factor activity; INVOLVED IN: regulation of transcription, DNA-dependent; EXPRESSED IN: 9 plant structures; EXPRESSED DURING: 6 growth stages; CONTAINS InterPro DOMAIN/s: Basic-leucine zipper (bZIP) transcription factor (InterPro:IPR004827), bZIP transcription factor, bZIP-1 (InterPro:…	0	1	TAIR10	2621904	2627848	-	0	1	0
1	2625077	2627959	MACS_peak_112	92.67	AT1G08320	protein_coding_gene	bZIP transcription factor family protein	---	bZIP transcription factor family protein; FUNCTIONS IN: DNA binding, sequence-specific DNA binding transcription factor activity; INVOLVED IN: regulation of transcription, DNA-dependent; EXPRESSED IN: 9 plant structures; EXPRESSED DURING: 6 growth stages; CONTAINS InterPro DOMAIN/s: Basic-leucine zipper (bZIP) transcription factor (InterPro:IPR004827), bZIP transcription factor, bZIP-1 (InterPro:…	0	1	TAIR10	2621904	2627848	-	0	2	0
1	2631019	2632129	MACS_peak_113	82.02	AT1G08340	protein_coding_gene	Rho GTPase activating protein with PAK-box/P21-Rho-binding domain	---	Rho GTPase activating protein with PAK-box/P21-Rho-binding domain; FUNCTIONS IN: Rac GTPase activator activity; INVOLVED IN: signal transduction; LOCATED IN: intracellular; EXPRESSED IN: 23 plant structures; EXPRESSED DURING: 13 growth stages; CONTAINS InterPro DOMAIN/s: PAK-box/P21-Rho-binding (InterPro:IPR000095), Rho GTPase activation protein (InterPro:IPR008936), RhoGAP (InterPro:IPR000198); …	0	1	TAIR10	2631068	2632871	+	0	0	0
1	2658436	2661957	MACS_peak_114	166	AT1G08430	protein_coding_gene	aluminum-activated malate transporter 1	Encodes a Al-activated malate efflux transporter. Is essential for aluminum tolerance but does not represent the major Al tolerance QTL. Staurosporine and calyculin A both block all changes in AtALMT1 gene expression (as a result malate release is totally inhibited).	aluminum-activated malate transporter 1 (ALMT1); CONTAINS InterPro DOMAIN/s: Malate transporter, aliminium toerance (InterPro:IPR020966); BEST Arabidopsis thaliana protein match is: Aluminium activated malate transporter family protein (TAIR:AT1G08440.1); Has 520 Blast hits to 518 proteins in 110 species: Archae - 0; Bacteria - 144; Metazoa - 0; Fungi - 10; Plants - 351; Viruses - 0; Other Eukary…	0	1	TAIR10	2658716	2661029	+	2	1	0
1	2675685	2680389	MACS_peak_115	238.3	AT1G08465	protein_coding_gene	Plant-specific transcription factor YABBY family protein	Member of the YABBY family of Arabidopsis proteins involved in the abaxial cell fate specification in lateral organs	YABBY2 (YAB2); CONTAINS InterPro DOMAIN/s: High mobility group, superfamily (InterPro:IPR009071), YABBY protein (InterPro:IPR006780); BEST Arabidopsis thaliana protein match is: plant-specific transcription factor YABBY family protein (TAIR:AT2G26580.2); Has 446 Blast hits to 444 proteins in 124 species: Archae - 0; Bacteria - 0; Metazoa - 0; Fungi - 2; Plants - 433; Viruses - 0; Other Eukaryotes…	0	1	TAIR10	2675813	2679781	+	0	4	0
1	2716996	2717865	MACS_peak_116	57.58	AT1G08580	protein_coding_gene	---	---	unknown protein; Has 39 Blast hits to 39 proteins in 15 species: Archae - 0; Bacteria - 0; Metazoa - 0; Fungi - 0; Plants - 35; Viruses - 0; Other Eukaryotes - 4 (source: NCBI BLink).	-593	1	TAIR10	2715079	2716404	-	0	0	0
1	2760167	2762130	MACS_peak_117	290.92	AT1G08670	protein_coding_gene	ENTH/VHS family protein	---	ENTH/VHS family protein; CONTAINS InterPro DOMAIN/s: Epsin, N-terminal (InterPro:IPR001026), Epsin-like, N-terminal (InterPro:IPR013809), ENTH/VHS (InterPro:IPR008942); BEST Arabidopsis thaliana protein match is: ENTH/VHS family protein (TAIR:AT3G46540.1); Has 902 Blast hits to 902 proteins in 167 species: Archae - 0; Bacteria - 0; Metazoa - 537; Fungi - 217; Plants - 109; Viruses - 0; Other Euka…	0	1	TAIR10	2760346	2761573	-	0	0	0
1	2841573	2844518	MACS_peak_118	360.03	AT1G08860	protein_coding_gene	Calcium-dependent phospholipid-binding Copine family protein	Encodes a copine-like protein, which is a member of a newly identified class of calcium-dependent, phospholipid binding proteins that are present in a wide range of organisms. Overexpression of this gene suppresses bon1-1 phenotypes. Double mutant analyses with bon1-1 suggest that BON1 and BON3 have overlapping functions in maintaining cellular homeostasis and inhibiting cell death.	BONZAI 3 (BON3); FUNCTIONS IN: calcium-dependent phospholipid binding; INVOLVED IN: N-terminal protein myristoylation, cellular homeostasis, positive regulation of cellular defense response, negative regulation of cell death; EXPRESSED IN: sperm cell, male gametophyte, flower, pollen tube; EXPRESSED DURING: L mature pollen stage, M germinated pollen stage, 4 anthesis, petal differentiation and ex…	0	1	TAIR10	2842153	2846138	+	0	1	1
1	2863806	2865106	MACS_peak_119	169.39	---	---	---	---	---	---	---	---	---	---	---	0	0	0
1	2888107	2890889	MACS_peak_120	571.95	AT1G08990	protein_coding_gene	plant glycogenin-like starch initiation protein 5	---	plant glycogenin-like starch initiation protein 5 (PGSIP5); FUNCTIONS IN: transferase activity, transferring glycosyl groups; INVOLVED IN: biosynthetic process; LOCATED IN: endomembrane system; EXPRESSED IN: root; CONTAINS InterPro DOMAIN/s: Glycosyl transferase, family 8 (InterPro:IPR002495); BEST Arabidopsis thaliana protein match is: plant glycogenin-like starch initiation protein 4 (TAIR:AT1G…	0	1	TAIR10	2888753	2890959	+	0	3	1
1	2905557	2910499	MACS_peak_121	523.98	AT1G09030	protein_coding_gene	nuclear factor Y, subunit B4	---	nuclear factor Y, subunit B4 (NF-YB4); FUNCTIONS IN: sequence-specific DNA binding transcription factor activity; INVOLVED IN: regulation of transcription; LOCATED IN: intracellular, nucleus; CONTAINS InterPro DOMAIN/s: Transcription factor, CBFA/NFYB, DNA topoisomerase (InterPro:IPR003957), Transcription factor CBF/NF-Y/archaeal histone (InterPro:IPR003958), Histone-fold (InterPro:IPR009072), Tr…	0	1	TAIR10	2908611	2909030	-	2	4	0
1	2933284	2935197	MACS_peak_122	315.88	AT1G09090	protein_coding_gene	respiratory burst oxidase homolog B	NADPH-oxidase AtrbohB plays a role in seed after-ripening. Major producer of superoxide in germinating seeds. AtrbohB pre-mRNA is alternatively spliced in seeds in a hormonally and developmentally regulated manner. ABA caused accumulation of AtrbohB-? mRNA and prevented prevented AtrbohB-a mRNA expression in fresh seeds.	respiratory burst oxidase homolog B (RBOHB); FUNCTIONS IN: NAD(P)H oxidase activity; INVOLVED IN: response to heat, seed germination, defense response; LOCATED IN: integral to membrane, membrane; EXPRESSED IN: embryo, root; EXPRESSED DURING: imbibition; CONTAINS InterPro DOMAIN/s: Ferredoxin reductase-type FAD-binding domain (InterPro:IPR017927), Cytochrome b245, heavy chain (InterPro:IPR000778),…	0	1	TAIR10	2932739	2936586	+	0	0	0
1	2984919	2986042	MACS_peak_123	159.38	AT1G09240	protein_coding_gene	nicotianamine synthase 3	Encodes a nicotianamine synthase.	nicotianamine synthase 3 (NAS3); CONTAINS InterPro DOMAIN/s: Nicotianamine synthase (InterPro:IPR004298); BEST Arabidopsis thaliana protein match is: nicotianamine synthase 4 (TAIR:AT1G56430.1); Has 198 Blast hits to 195 proteins in 46 species: Archae - 20; Bacteria - 10; Metazoa - 0; Fungi - 20; Plants - 147; Viruses - 0; Other Eukaryotes - 1 (source: NCBI BLink).	0	1	TAIR10	2984881	2986130	+	0	1	0
1	3019481	3023709	MACS_peak_124	437.98	AT1G09360	protein_coding_gene	Plant invertase/pectin methylesterase inhibitor superfamily protein	---	Plant invertase/pectin methylesterase inhibitor superfamily protein; FUNCTIONS IN: enzyme inhibitor activity, pectinesterase inhibitor activity, pectinesterase activity; INVOLVED IN: biological_process unknown; LOCATED IN: cellular_component unknown; CONTAINS InterPro DOMAIN/s: Pectinesterase inhibitor (InterPro:IPR006501); BEST Arabidopsis thaliana protein match is: Plant invertase/pectin methyl…	0	1	TAIR10	3021802	3022368	+	0	1	0
1	3028539	3030290	MACS_peak_125	491.4	AT1G09380	protein_coding_gene	nodulin MtN21 /EamA-like transporter family protein	nodulin MtN21-like transporter family protein	nodulin MtN21 /EamA-like transporter family protein; LOCATED IN: endomembrane system, membrane; EXPRESSED IN: 15 plant structures; EXPRESSED DURING: 4 anthesis, C globular stage, petal differentiation and expansion stage, LP.08 eight leaves visible; CONTAINS InterPro DOMAIN/s: Protein of unknown function DUF6, transmembrane (InterPro:IPR000620); BEST Arabidopsis thaliana protein match is: nodulin…	0	1	TAIR10	3026135	3029549	-	0	1	0
1	3059816	3062437	MACS_peak_126	155.06	AT1G09483	protein_coding_gene	---	---	unknown protein; BEST Arabidopsis thaliana protein match is: unknown protein (TAIR:AT1G09470.1); Has 48 Blast hits to 48 proteins in 9 species: Archae - 0; Bacteria - 0; Metazoa - 0; Fungi - 0; Plants - 48; Viruses - 0; Other Eukaryotes - 0 (source: NCBI BLink).	0	1	TAIR10	3060992	3061729	-	1	4	0
1	3066575	3068599	MACS_peak_127	229.24	AT1G09500	protein_coding_gene	NAD(P)-binding Rossmann-fold superfamily protein	similar to Eucalyptus gunnii alcohol dehydrogenase of unknown physiological function (GI:1143445), Vigna unguiculata (gi:1854445), NOT a cinnamyl-alcohol dehydrogenase	NAD(P)-binding Rossmann-fold superfamily protein; FUNCTIONS IN: alcohol dehydrogenase (NAD) activity, cinnamyl-alcohol dehydrogenase activity; INVOLVED IN: lignin biosynthetic process, cellular metabolic process, metabolic process; LOCATED IN: endomembrane system; EXPRESSED IN: 9 plant structures; EXPRESSED DURING: LP.06 six leaves visible, LP.04 four leaves visible, 4 anthesis, petal differentia…	0	1	TAIR10	3066699	3068598	+	0	0	0
1	3068982	3070246	MACS_peak_128	134.75	AT1G09510	protein_coding_gene	NAD(P)-binding Rossmann-fold superfamily protein	similar to Eucalyptus gunnii alcohol dehydrogenase of unknown physiological function (GI:1143445), Vigna unguiculata (gi:1854445), NOT a cinnamyl-alcohol dehydrogenase	NAD(P)-binding Rossmann-fold superfamily protein; FUNCTIONS IN: alcohol dehydrogenase (NAD) activity, cinnamyl-alcohol dehydrogenase activity; INVOLVED IN: lignin biosynthetic process, cellular metabolic process, metabolic process; LOCATED IN: cellular_component unknown; EXPRESSED IN: 8 plant structures; EXPRESSED DURING: LP.04 four leaves visible, 4 anthesis, C globular stage, F mature embryo st…	0	1	TAIR10	3069385	3070910	+	0	0	0
1	3079681	3081086	MACS_peak_129	81.14	---	---	---	---	---	---	---	---	---	---	---	0	2	0
1	3081129	3083991	MACS_peak_130	293.03	---	---	---	---	---	---	---	---	---	---	---	1	1	0
1	3089555	3092897	MACS_peak_131	664.5	AT1G09550	protein_coding_gene	Pectinacetylesterase family protein	---	Pectinacetylesterase family protein; FUNCTIONS IN: carboxylesterase activity; INVOLVED IN: biological_process unknown; LOCATED IN: endomembrane system; CONTAINS InterPro DOMAIN/s: Pectinacetylesterase (InterPro:IPR004963); BEST Arabidopsis thaliana protein match is: Pectinacetylesterase family protein (TAIR:AT1G57590.1); Has 515 Blast hits to 510 proteins in 88 species: Archae - 0; Bacteria - 30;…	0	1	TAIR10	3089733	3092327	-	2	3	0
1	3131429	3132347	MACS_peak_132	92.07	AT1G09660	protein_coding_gene	RNA-binding KH domain-containing protein	---	RNA-binding KH domain-containing protein; FUNCTIONS IN: RNA binding, nucleic acid binding; INVOLVED IN: biological_process unknown; LOCATED IN: cellular_component unknown; EXPRESSED IN: 23 plant structures; EXPRESSED DURING: 13 growth stages; CONTAINS InterPro DOMAIN/s: K Homology (InterPro:IPR004087); BEST Arabidopsis thaliana protein match is: RNA-binding KH domain-containing protein (TAIR:AT4G…	-336	1	TAIR10	3127771	3131094	-	0	1	0
1	3132700	3133860	MACS_peak_133	78.57	AT1G09665	protein_coding_gene	Toll-Interleukin-Resistance (TIR) domain family protein	---	Toll-Interleukin-Resistance (TIR) domain family protein; FUNCTIONS IN: transmembrane receptor activity; INVOLVED IN: defense response signaling pathway, resistance gene-dependent, signal transduction, defense response, innate immune response; LOCATED IN: intrinsic to membrane; CONTAINS InterPro DOMAIN/s: Toll-Interleukin receptor (InterPro:IPR000157); BEST Arabidopsis thaliana protein match is: T…	0	1	TAIR10	3133095	3133674	+	0	1	0
1	3169399	3171910	MACS_peak_134	264.41	AT1G09790	protein_coding_gene	COBRA-like protein 6 precursor	---	COBRA-like protein 6 precursor (COBL6); CONTAINS InterPro DOMAIN/s: Glycosyl-phosphatidyl inositol-anchored, plant (InterPro:IPR006918), COBRA-like (InterPro:IPR017391); BEST Arabidopsis thaliana protein match is: COBRA-like protein 1 precursor (TAIR:AT3G02210.1); Has 376 Blast hits to 369 proteins in 30 species: Archae - 0; Bacteria - 0; Metazoa - 0; Fungi - 0; Plants - 376; Viruses - 0; Other E…	0	1	TAIR10	3168482	3170819	-	1	0	0
1	3184778	3186177	MACS_peak_135	134	AT1G09810	protein_coding_gene	evolutionarily conserved C-terminal region 11	---	evolutionarily conserved C-terminal region 11 (ECT11); CONTAINS InterPro DOMAIN/s: YTH domain (InterPro:IPR007275); BEST Arabidopsis thaliana protein match is: evolutionarily conserved C-terminal region 8 (TAIR:AT1G79270.1); Has 926 Blast hits to 916 proteins in 151 species: Archae - 0; Bacteria - 0; Metazoa - 416; Fungi - 98; Plants - 333; Viruses - 0; Other Eukaryotes - 79 (source: NCBI BLink).	-555	1	TAIR10	3180936	3184224	-	0	0	0
1	3213972	3214826	MACS_peak_136	52.66	AT1G09890	protein_coding_gene	Rhamnogalacturonate lyase family protein	---	Rhamnogalacturonate lyase family protein; CONTAINS InterPro DOMAIN/s: Rhamnogalacturonate lyase (InterPro:IPR010325), Carbohydrate-binding-like fold (InterPro:IPR013784), Galactose-binding domain-like (InterPro:IPR008979); BEST Arabidopsis thaliana protein match is: Rhamnogalacturonate lyase family protein (TAIR:AT1G09910.1); Has 301 Blast hits to 285 proteins in 64 species: Archae - 0; Bacteria …	0	1	TAIR10	3214237	3217538	-	0	0	0
1	3216674	3217739	MACS_peak_137	92.28	AT1G09890	protein_coding_gene	Rhamnogalacturonate lyase family protein	---	Rhamnogalacturonate lyase family protein; CONTAINS InterPro DOMAIN/s: Rhamnogalacturonate lyase (InterPro:IPR010325), Carbohydrate-binding-like fold (InterPro:IPR013784), Galactose-binding domain-like (InterPro:IPR008979); BEST Arabidopsis thaliana protein match is: Rhamnogalacturonate lyase family protein (TAIR:AT1G09910.1); Has 301 Blast hits to 285 proteins in 64 species: Archae - 0; Bacteria …	0	1	TAIR10	3214237	3217538	-	0	0	0
1	3227754	3231458	MACS_peak_138	76.16	AT1G09930	protein_coding_gene	oligopeptide transporter 2	oligopeptide transporter	oligopeptide transporter 2 (OPT2); FUNCTIONS IN: oligopeptide transporter activity; INVOLVED IN: oligopeptide transport, transmembrane transport; LOCATED IN: plasma membrane, membrane; EXPRESSED IN: sperm cell, flower, pollen tube; EXPRESSED DURING: 4 anthesis; CONTAINS InterPro DOMAIN/s: Tetrapeptide transporter, OPT1/isp4 (InterPro:IPR004648), Oligopeptide transporter OPT superfamily (InterPro:…	0	1	TAIR10	3227490	3230043	-	0	2	0
1	3231601	3236794	MACS_peak_139	173.92	AT1G09935	protein_coding_gene	Phosphoglycerate mutase family protein	---	Phosphoglycerate mutase family protein; FUNCTIONS IN: catalytic activity; INVOLVED IN: metabolic process; LOCATED IN: cellular_component unknown; CONTAINS InterPro DOMAIN/s: Histidine phosphatase superfamily, clade-1 (InterPro:IPR013078), Phosphoglycerate/bisphosphoglycerate mutase, active site (InterPro:IPR001345); BEST Arabidopsis thaliana protein match is: Phosphoglycerate mutase family protei…	0	1	TAIR10	3234060	3235530	-	0	0	0
1	3244006	3245216	MACS_peak_140	239.47	AT1G09960	protein_coding_gene	sucrose transporter 4	low affinity (10mM) sucrose transporter in sieve elements (phloem)	sucrose transporter 4 (SUT4); FUNCTIONS IN: sucrose transmembrane transporter activity, carbohydrate transmembrane transporter activity, sugar:hydrogen symporter activity, sucrose:hydrogen symporter activity; INVOLVED IN: sucrose transport, transmembrane transport; LOCATED IN: plasma membrane, vacuole, membrane; EXPRESSED IN: 24 plant structures; EXPRESSED DURING: 13 growth stages; CONTAINS Inter…	0	1	TAIR10	3244213	3247200	+	1	0	1
1	3353795	3355148	MACS_peak_141	466.76	AT1G10220	protein_coding_gene	---	---	BEST Arabidopsis thaliana protein match is: ZCF37 (TAIR:AT1G59590.1); Has 43 Blast hits to 43 proteins in 15 species: Archae - 0; Bacteria - 2; Metazoa - 7; Fungi - 0; Plants - 27; Viruses - 0; Other Eukaryotes - 7 (source: NCBI BLink).	0	1	TAIR10	3352159	3354856	+	0	1	1
1	3359722	3360693	MACS_peak_142	53.49	AT1G10240	protein_coding_gene	FAR1-related sequence 11	---	FAR1-related sequence 11 (FRS11); FUNCTIONS IN: zinc ion binding; INVOLVED IN: response to red or far red light; LOCATED IN: cellular_component unknown; EXPRESSED IN: 20 plant structures; EXPRESSED DURING: 12 growth stages; CONTAINS InterPro DOMAIN/s: MULE transposase, conserved domain (InterPro:IPR018289), Transcription factor, FAR1-related (InterPro:IPR004330), Zinc finger, PMZ-type (InterPro:I…	0	1	TAIR10	3356680	3359838	-	0	0	0
1	3361874	3363192	MACS_peak_143	276.94	AT1G10270	protein_coding_gene	glutamine-rich protein 23	---	glutamine-rich protein 23 (GRP23); FUNCTIONS IN: binding; INVOLVED IN: embryo development, cell division; LOCATED IN: nucleus; EXPRESSED IN: 26 plant structures; EXPRESSED DURING: 14 growth stages; CONTAINS InterPro DOMAIN/s: Pentatricopeptide repeat (InterPro:IPR002885), Tetratricopeptide-like helical (InterPro:IPR011990); BEST Arabidopsis thaliana protein match is: Pentatricopeptide repeat (PPR…	-312	1	TAIR10	3363504	3366488	+	1	1	0
1	3400600	3402674	MACS_peak_144	119.52	AT1G10380	protein_coding_gene	Putative membrane lipoprotein	---	Putative membrane lipoprotein; FUNCTIONS IN: molecular_function unknown; INVOLVED IN: biological_process unknown; LOCATED IN: endomembrane system; EXPRESSED IN: 19 plant structures; EXPRESSED DURING: 10 growth stages; BEST Arabidopsis thaliana protein match is: unknown protein (TAIR:AT3G17350.1); Has 280 Blast hits to 279 proteins in 14 species: Archae - 0; Bacteria - 0; Metazoa - 0; Fungi - 0; P…	0	1	TAIR10	3400606	3402324	+	1	0	0
1	3402985	3404782	MACS_peak_145	87.62	AT1G10385	protein_coding_gene	Vps51/Vps67 family (components of vesicular transport) protein	---	Vps51/Vps67 family (components of vesicular transport) protein; CONTAINS InterPro DOMAIN/s: Vps51/Vps67 (InterPro:IPR014812); BEST Arabidopsis thaliana protein match is: exocyst complex component 84B (TAIR:AT5G49830.1); Has 436 Blast hits to 368 proteins in 139 species: Archae - 0; Bacteria - 32; Metazoa - 153; Fungi - 106; Plants - 134; Viruses - 0; Other Eukaryotes - 11 (source: NCBI BLink).	0	1	TAIR10	3403224	3405856	+	0	0	0
1	3414756	3415929	MACS_peak_146	311.7	AT1G10400	protein_coding_gene	UDP-Glycosyltransferase superfamily protein	---	UDP-Glycosyltransferase superfamily protein; FUNCTIONS IN: UDP-glycosyltransferase activity, transferase activity, transferring glycosyl groups; INVOLVED IN: metabolic process; LOCATED IN: endomembrane system; EXPRESSED IN: root; CONTAINS InterPro DOMAIN/s: UDP-glucuronosyl/UDP-glucosyltransferase (InterPro:IPR002213), Tudor subgroup (InterPro:IPR018351); BEST Arabidopsis thaliana protein match i…	0	1	TAIR10	3414852	3416358	-	0	1	0
1	3447435	3451156	MACS_peak_147	315.37	AT1G10480	protein_coding_gene	zinc finger protein 5	Encodes a zinc finger protein containing only a single zinc finger that acts downstream of ZFP6 in regulating trichome development by integrating GA and cytokinin signaling.	zinc finger protein 5 (ZFP5); FUNCTIONS IN: sequence-specific DNA binding transcription factor activity, zinc ion binding, nucleic acid binding; INVOLVED IN: regulation of transcription; LOCATED IN: intracellular, chloroplast; EXPRESSED IN: inflorescence meristem, hypocotyl, root, flower; EXPRESSED DURING: petal differentiation and expansion stage; CONTAINS InterPro DOMAIN/s: Zinc finger, C2H2-ty…	0	1	TAIR10	3449691	3451226	+	0	2	1
1	3482656	3483977	MACS_peak_148	232.56	AT1G10560	protein_coding_gene	plant U-box 18	Encodes a protein containing a UND, a U-box, and an ARM domain. This protein has E3 ubiquitin ligase activity based on in vitro assays.	plant U-box 18 (PUB18); FUNCTIONS IN: ubiquitin-protein ligase activity; INVOLVED IN: protein ubiquitination; LOCATED IN: ubiquitin ligase complex; EXPRESSED IN: 9 plant structures; EXPRESSED DURING: 4 anthesis, LP.10 ten leaves visible, petal differentiation and expansion stage; CONTAINS InterPro DOMAIN/s: Zinc finger, RING-type (InterPro:IPR001841), U box domain (InterPro:IPR003613), Armadillo-…	-603	1	TAIR10	3484580	3486965	+	0	1	0
1	3493930	3495783	MACS_peak_149	259.86	AT1G10585	protein_coding_gene	basic helix-loop-helix (bHLH) DNA-binding superfamily protein	---	basic helix-loop-helix (bHLH) DNA-binding superfamily protein; FUNCTIONS IN: sequence-specific DNA binding transcription factor activity; INVOLVED IN: regulation of transcription; LOCATED IN: nucleus; EXPRESSED IN: 7 plant structures; EXPRESSED DURING: LP.06 six leaves visible, 4 anthesis, LP.10 ten leaves visible, petal differentiation and expansion stage, LP.08 eight leaves visible; CONTAINS In…	0	1	TAIR10	3493940	3495144	-	0	1	0
1	3509727	3512123	MACS_peak_150	382.4	AT1G10620	protein_coding_gene	Protein kinase superfamily protein	Encodes a member of the proline-rich extensin-like receptor kinase (PERK) family. This family consists of 15 predicted receptor kinases (PMID: 15653807).	Protein kinase superfamily protein; FUNCTIONS IN: protein serine/threonine kinase activity, protein kinase activity, kinase activity, ATP binding; INVOLVED IN: protein amino acid phosphorylation; EXPRESSED IN: sepal, male gametophyte, flower, pollen tube; EXPRESSED DURING: L mature pollen stage, M germinated pollen stage, 4 anthesis; CONTAINS InterPro DOMAIN/s: Protein kinase, ATP binding site (I…	0	1	TAIR10	3509001	3511975	-	0	1	0
1	3543191	3544027	MACS_peak_151	73.33	AT1G10680	protein_coding_gene	P-glycoprotein 10	---	P-glycoprotein 10 (PGP10); FUNCTIONS IN: ATPase activity, coupled to transmembrane movement of substances; INVOLVED IN: transport, transmembrane transport; LOCATED IN: mitochondrion; EXPRESSED IN: sperm cell, male gametophyte; EXPRESSED DURING: L mature pollen stage, M germinated pollen stage; CONTAINS InterPro DOMAIN/s: ATPase, AAA+ type, core (InterPro:IPR003593), ABC transporter-like (InterPro…	0	1	TAIR10	3538470	3543782	-	0	0	0
1	3573813	3574980	MACS_peak_152	132.63	AT1G10750	protein_coding_gene	Protein of Unknown Function (DUF239)	---	Protein of Unknown Function (DUF239); INVOLVED IN: N-terminal protein myristoylation; EXPRESSED IN: 13 plant structures; EXPRESSED DURING: 6 growth stages; CONTAINS InterPro DOMAIN/s: Protein of unknown function DUF239, plant (InterPro:IPR004314); BEST Arabidopsis thaliana protein match is: Protein of Unknown Function (DUF239) (TAIR:AT1G23340.2); Has 789 Blast hits to 744 proteins in 31 species: …	0	1	TAIR10	3574807	3578474	-	1	2	0
1	3624440	3627470	MACS_peak_153	418.47	AT1G10880	protein_coding_gene	Core-2/I-branching beta-1,6-N-acetylglucosaminyltransferase family protein	Putative role in response to salt stress. Mutants grow larger than the wild type under salt stress condition (Ann Stapleton and Ashley Green, 2009, personal communication).	Core-2/I-branching beta-1,6-N-acetylglucosaminyltransferase family protein; INVOLVED IN: response to salt stress; LOCATED IN: cellular_component unknown; EXPRESSED IN: cultured cell; CONTAINS InterPro DOMAIN/s: Core-2/I-Branching enzyme (InterPro:IPR021141); BEST Arabidopsis thaliana protein match is: Core-2/I-branching beta-1,6-N-acetylglucosaminyltransferase family protein (TAIR:AT5G16170.1); H…	0	1	TAIR10	3624035	3627082	-	0	1	0
1	3694203	3698429	MACS_peak_154	231.79	AT1G11080	protein_coding_gene	serine carboxypeptidase-like 31	---	serine carboxypeptidase-like 31 (scpl31); FUNCTIONS IN: serine-type carboxypeptidase activity; INVOLVED IN: proteolysis; LOCATED IN: endomembrane system; EXPRESSED IN: 17 plant structures; EXPRESSED DURING: 4 anthesis, C globular stage, petal differentiation and expansion stage, E expanded cotyledon stage, D bilateral stage; CONTAINS InterPro DOMAIN/s: Peptidase S10, serine carboxypeptidase (Inte…	0	1	TAIR10	3694672	3698013	-	2	0	0
1	3700115	3701953	MACS_peak_155	73.05	AT1G11090	protein_coding_gene	alpha/beta-Hydrolases superfamily protein	---	alpha/beta-Hydrolases superfamily protein; CONTAINS InterPro DOMAIN/s: Serine hydrolase (InterPro:IPR005645); BEST Arabidopsis thaliana protein match is: alpha/beta-Hydrolases superfamily protein (TAIR:AT2G47630.1); Has 3873 Blast hits to 3868 proteins in 1106 species: Archae - 36; Bacteria - 2649; Metazoa - 131; Fungi - 140; Plants - 451; Viruses - 35; Other Eukaryotes - 431 (source: NCBI BLink).	-655	1	TAIR10	3702608	3703779	+	0	0	0
1	3730944	3731988	MACS_peak_156	112	---	---	---	---	---	---	---	---	---	---	---	0	0	0
1	3756133	3757259	MACS_peak_157	67.71	AT1G11210	protein_coding_gene	Protein of unknown function (DUF761)	---	Protein of unknown function (DUF761); FUNCTIONS IN: molecular_function unknown; INVOLVED IN: response to oxidative stress; LOCATED IN: endomembrane system; EXPRESSED IN: 10 plant structures; EXPRESSED DURING: LP.06 six leaves visible, LP.04 four leaves visible, 4 anthesis, petal differentiation and expansion stage; CONTAINS InterPro DOMAIN/s: Protein of unknown function DUF761, plant (InterPro:IP…	0	1	TAIR10	3755677	3756998	-	0	1	0
1	3762792	3764900	MACS_peak_158	678.64	AT1G11230	protein_coding_gene	Protein of unknown function (DUF761)	---	Protein of unknown function (DUF761); FUNCTIONS IN: molecular_function unknown; INVOLVED IN: biological_process unknown; LOCATED IN: endomembrane system; CONTAINS InterPro DOMAIN/s: Protein of unknown function DUF761, plant (InterPro:IPR008480); BEST Arabidopsis thaliana protein match is: Protein of unknown function (DUF761) (TAIR:AT1G11220.1); Has 73 Blast hits to 72 proteins in 12 species: Arch…	0	1	TAIR10	3763268	3764483	-	1	1	1
1	3768589	3769904	MACS_peak_159	249.56	AT1G11250	protein_coding_gene	syntaxin of plants 125	member of SYP12 Gene Family	syntaxin of plants 125 (SYP125); FUNCTIONS IN: SNAP receptor activity; INVOLVED IN: intracellular protein transport, cellular membrane fusion; LOCATED IN: membrane; EXPRESSED IN: 6 plant structures; EXPRESSED DURING: L mature pollen stage, M germinated pollen stage, 4 anthesis, petal differentiation and expansion stage; CONTAINS InterPro DOMAIN/s: Target SNARE coiled-coil domain (InterPro:IPR0007…	0	1	TAIR10	3768724	3769706	+	0	0	0
1	3827704	3831327	MACS_peak_160	543.1	AT1G11370	protein_coding_gene	Pectin lyase-like superfamily protein	---	Pectin lyase-like superfamily protein; FUNCTIONS IN: pectinesterase activity; INVOLVED IN: cell wall modification; LOCATED IN: endomembrane system, cell wall, plant-type cell wall; EXPRESSED IN: flower; CONTAINS InterPro DOMAIN/s: Pectinesterase, active site (InterPro:IPR018040), Pectin lyase fold/virulence factor (InterPro:IPR011050), Pectinesterase, catalytic (InterPro:IPR000070), Pectin lyase …	0	1	TAIR10	3828098	3830945	-	0	1	0
1	3859261	3862325	MACS_peak_161	589.96	AT1G11470	protein_coding_gene	Pentatricopeptide repeat (PPR) superfamily protein	---	Pentatricopeptide repeat (PPR) superfamily protein; FUNCTIONS IN: molecular_function unknown; INVOLVED IN: biological_process unknown; LOCATED IN: chloroplast; BEST Arabidopsis thaliana protein match is: Tetratricopeptide repeat (TPR)-like superfamily protein (TAIR:AT1G02370.1); Has 31 Blast hits to 31 proteins in 3 species: Archae - 0; Bacteria - 0; Metazoa - 0; Fungi - 0; Plants - 31; Viruses -…	0	1	TAIR10	3859662	3860604	-	2	1	0
1	3867479	3868799	MACS_peak_162	205.31	---	---	---	---	---	---	---	---	---	---	---	0	0	0
1	3872362	3874018	MACS_peak_163	203.11	AT1G11520	protein_coding_gene	pliceosome associated protein-related	---	pliceosome associated protein-related; FUNCTIONS IN: molecular_function unknown; INVOLVED IN: biological_process unknown; LOCATED IN: chloroplast; EXPRESSED IN: male gametophyte, pollen tube; EXPRESSED DURING: L mature pollen stage, M germinated pollen stage; BEST Arabidopsis thaliana protein match is: proline-rich spliceosome-associated (PSP) family protein (TAIR:AT4G21660.2); Has 139 Blast hits…	0	1	TAIR10	3873029	3873619	+	0	0	0
1	3882098	3883271	MACS_peak_164	87.57	AT1G11560	protein_coding_gene	Oligosaccharyltransferase complex/magnesium transporter family protein	---	Oligosaccharyltransferase complex/magnesium transporter family protein; FUNCTIONS IN: oligosaccharide transmembrane transporter activity; INVOLVED IN: biological_process unknown; LOCATED IN: endomembrane system; EXPRESSED IN: flower; EXPRESSED DURING: 4 anthesis; CONTAINS InterPro DOMAIN/s: Magnesium transporter protein 1 (InterPro:IPR006844), Oligosaccharyltransferase complex/magnesium transport…	0	1	TAIR10	3881788	3882819	+	0	0	0
1	3884297	3885333	MACS_peak_165	84.16	AT1G11572	protein_coding_gene	Plant thionin family protein	Encodes a Plant thionin family protein	Plant thionin family protein; LOCATED IN: endomembrane system; Has 7 Blast hits to 7 proteins in 4 species: Archae - 0; Bacteria - 0; Metazoa - 0; Fungi - 0; Plants - 7; Viruses - 0; Other Eukaryotes - 0 (source: NCBI BLink).	0	1	TAIR10	3884356	3884952	+	0	0	0
1	3888363	3890810	MACS_peak_166	607.84	AT1G11580	protein_coding_gene	methylesterase PCR A	---	methylesterase PCR A (PMEPCRA); FUNCTIONS IN: enzyme inhibitor activity, pectinesterase activity; INVOLVED IN: cell wall modification; LOCATED IN: cell wall, plasma membrane, plant-type cell wall; EXPRESSED IN: 25 plant structures; EXPRESSED DURING: 13 growth stages; CONTAINS InterPro DOMAIN/s: Pectinesterase, active site (InterPro:IPR018040), Pectin lyase fold/virulence factor (InterPro:IPR01105…	0	1	TAIR10	3888690	3890811	+	0	1	0
1	3901438	3903869	MACS_peak_167	506.1	AT1G11600	protein_coding_gene	cytochrome P450, family 77, subfamily B, polypeptide 1	member of CYP77B	cytochrome P450, family 77, subfamily B, polypeptide 1 (CYP77B1); FUNCTIONS IN: electron carrier activity, monooxygenase activity, iron ion binding, oxygen binding, heme binding; INVOLVED IN: oxidation reduction; LOCATED IN: endomembrane system; EXPRESSED IN: 17 plant structures; EXPRESSED DURING: 8 growth stages; CONTAINS InterPro DOMAIN/s: Cytochrome P450 (InterPro:IPR001128), Cytochrome P450, …	0	1	TAIR10	3902012	3903782	+	0	1	1
1	3907183	3909656	MACS_peak_168	347.03	AT1G11610	protein_coding_gene	cytochrome P450, family 71, subfamily A, polypeptide 18	putative cytochrome P450	cytochrome P450, family 71, subfamily A, polypeptide 18 (CYP71A18); FUNCTIONS IN: electron carrier activity, monooxygenase activity, iron ion binding, oxygen binding, heme binding; INVOLVED IN: oxidation reduction; CONTAINS InterPro DOMAIN/s: Cytochrome P450 (InterPro:IPR001128), Cytochrome P450, conserved site (InterPro:IPR017972), Cytochrome P450, E-class, group I (InterPro:IPR002401); BEST Ara…	0	1	TAIR10	3906862	3909338	-	0	0	0
1	3930202	3932069	MACS_peak_169	224.85	AT1G11670	protein_coding_gene	MATE efflux family protein	---	MATE efflux family protein; FUNCTIONS IN: antiporter activity, drug transmembrane transporter activity, transporter activity; INVOLVED IN: drug transmembrane transport, N-terminal protein myristoylation, transmembrane transport; LOCATED IN: membrane; EXPRESSED IN: 22 plant structures; EXPRESSED DURING: 13 growth stages; CONTAINS InterPro DOMAIN/s: Multi antimicrobial extrusion protein MatE (Inter…	0	1	TAIR10	3928162	3931576	-	0	0	0
1	3940992	3941880	MACS_peak_170	51.82	AT1G11690	protein_coding_gene	---	---	unknown protein; BEST Arabidopsis thaliana protein match is: unknown protein (TAIR:AT3G20350.1); Has 5959 Blast hits to 4807 proteins in 476 species: Archae - 156; Bacteria - 436; Metazoa - 2789; Fungi - 309; Plants - 336; Viruses - 9; Other Eukaryotes - 1924 (source: NCBI BLink).	0	1	TAIR10	3941469	3942212	+	0	0	0
1	3964458	3965440	MACS_peak_171	73.76	AT1G11740	protein_coding_gene	ankyrin repeat family protein	---	ankyrin repeat family protein; CONTAINS InterPro DOMAIN/s: Ankyrin repeat-containing domain (InterPro:IPR020683), Protein of unknown function DUF3424 (InterPro:IPR021832), Ankyrin repeat (InterPro:IPR002110); BEST Arabidopsis thaliana protein match is: Ankyrin repeat family protein (TAIR:AT1G62050.1); Has 1132 Blast hits to 1026 proteins in 130 species: Archae - 4; Bacteria - 26; Metazoa - 550; F…	0	1	TAIR10	3963054	3966824	-	0	0	0
1	3965590	3967205	MACS_peak_172	266.38	AT1G11740	protein_coding_gene	ankyrin repeat family protein	---	ankyrin repeat family protein; CONTAINS InterPro DOMAIN/s: Ankyrin repeat-containing domain (InterPro:IPR020683), Protein of unknown function DUF3424 (InterPro:IPR021832), Ankyrin repeat (InterPro:IPR002110); BEST Arabidopsis thaliana protein match is: Ankyrin repeat family protein (TAIR:AT1G62050.1); Has 1132 Blast hits to 1026 proteins in 130 species: Archae - 4; Bacteria - 26; Metazoa - 550; F…	0	1	TAIR10	3963054	3966824	-	0	0	0
1	3973424	3975214	MACS_peak_173	257.91	AT1G11765	protein_coding_gene	Plant self-incompatibility protein S1 family	---	Plant self-incompatibility protein S1 family; FUNCTIONS IN: molecular_function unknown; INVOLVED IN: biological_process unknown; LOCATED IN: endomembrane system; CONTAINS InterPro DOMAIN/s: Plant self-incompatibility S1 (InterPro:IPR010264); BEST Arabidopsis thaliana protein match is: Plant self-incompatibility protein S1 family (TAIR:AT3G26880.1); Has 176 Blast hits to 174 proteins in 10 species…	0	1	TAIR10	3973875	3974509	+	0	0	0
1	3975562	3976879	MACS_peak_174	222.16	AT1G11780	protein_coding_gene	oxidoreductase, 2OG-Fe(II) oxygenase family protein	---	oxidoreductase, 2OG-Fe(II) oxygenase family protein; BEST Arabidopsis thaliana protein match is: 2-oxoglutarate-dependent dioxygenase family protein (TAIR:AT5G01780.2); Has 1304 Blast hits to 1304 proteins in 617 species: Archae - 0; Bacteria - 928; Metazoa - 100; Fungi - 94; Plants - 80; Viruses - 0; Other Eukaryotes - 102 (source: NCBI BLink).	0	1	TAIR10	3976839	3979195	-	0	0	0
1	3998827	4000015	MACS_peak_175	213.62	AT1G11850	protein_coding_gene	---	---	unknown protein; FUNCTIONS IN: molecular_function unknown; INVOLVED IN: biological_process unknown; LOCATED IN: endomembrane system; EXPRESSED IN: 19 plant structures; EXPRESSED DURING: 12 growth stages; Has 38777 Blast hits to 8185 proteins in 741 species: Archae - 46; Bacteria - 14846; Metazoa - 13013; Fungi - 1392; Plants - 5894; Viruses - 543; Other Eukaryotes - 3043 (source: NCBI BLink).	0	1	TAIR10	3999199	3999876	+	0	1	0
1	4021803	4025791	MACS_peak_176	396.19	AT1G11920	protein_coding_gene	Pectin lyase-like superfamily protein	---	Pectin lyase-like superfamily protein; FUNCTIONS IN: lyase activity, pectate lyase activity; INVOLVED IN: biological_process unknown; LOCATED IN: endomembrane system; EXPRESSED IN: flower; EXPRESSED DURING: petal differentiation and expansion stage; CONTAINS InterPro DOMAIN/s: Pectin lyase fold/virulence factor (InterPro:IPR011050), AmbAllergen (InterPro:IPR018082), Pectate lyase/Amb allergen (In…	0	1	TAIR10	4023667	4025097	-	0	1	0
1	4046175	4046950	MACS_peak_177	87.61	AT1G11990	protein_coding_gene	O-fucosyltransferase family protein	---	O-fucosyltransferase family protein; CONTAINS InterPro DOMAIN/s: GDP-fucose protein O-fucosyltransferase (InterPro:IPR019378); BEST Arabidopsis thaliana protein match is: O-fucosyltransferase family protein (TAIR:AT1G62330.1); Has 811 Blast hits to 808 proteins in 28 species: Archae - 0; Bacteria - 0; Metazoa - 0; Fungi - 0; Plants - 811; Viruses - 0; Other Eukaryotes - 0 (source: NCBI BLink).	0	1	TAIR10	4046246	4049060	-	0	0	0
1	4056064	4057877	MACS_peak_178	413.67	AT1G12010	protein_coding_gene	2-oxoglutarate (2OG) and Fe(II)-dependent oxygenase superfamily protein	Encodes a protein that appears to have 1-amino-cyclopropane-1-carboxylic acid oxidase activity based on mutant analyses.	2-oxoglutarate (2OG) and Fe(II)-dependent oxygenase superfamily protein; CONTAINS InterPro DOMAIN/s: Oxoglutarate/iron-dependent oxygenase (InterPro:IPR005123); BEST Arabidopsis thaliana protein match is: ACC oxidase 2 (TAIR:AT1G62380.1); Has 8592 Blast hits to 8546 proteins in 1001 species: Archae - 0; Bacteria - 1125; Metazoa - 104; Fungi - 1034; Plants - 4961; Viruses - 0; Other Eukaryotes - 1…	0	1	TAIR10	4056207	4057933	+	1	2	0
1	4064572	4066858	MACS_peak_179	470.61	AT1G12030	protein_coding_gene	Protein of unknown function (DUF506)	---	Protein of unknown function (DUF506) ; CONTAINS InterPro DOMAIN/s: Protein of unknown function DUF506, plant (InterPro:IPR006502); BEST Arabidopsis thaliana protein match is: Protein of unknown function (DUF506) (TAIR:AT1G62420.1); Has 393 Blast hits to 391 proteins in 26 species: Archae - 0; Bacteria - 4; Metazoa - 0; Fungi - 0; Plants - 387; Viruses - 0; Other Eukaryotes - 2 (source: NCBI BLink…	0	1	TAIR10	4064667	4066341	-	0	1	1
1	4077252	4078373	MACS_peak_180	142.34	AT1G12064	protein_coding_gene	---	---	unknown protein; LOCATED IN: endomembrane system; Has 35333 Blast hits to 34131 proteins in 2444 species: Archae - 798; Bacteria - 22429; Metazoa - 974; Fungi - 991; Plants - 531; Viruses - 0; Other Eukaryotes - 9610 (source: NCBI BLink).	0	1	TAIR10	4077498	4078095	-	0	1	0
1	4078475	4080305	MACS_peak_181	341.91	AT1G12070	protein_coding_gene	Immunoglobulin E-set superfamily protein	---	Immunoglobulin E-set superfamily protein; FUNCTIONS IN: Rho GDP-dissociation inhibitor activity; INVOLVED IN: biological_process unknown; LOCATED IN: cytoplasm; EXPRESSED IN: 10 plant structures; EXPRESSED DURING: L mature pollen stage, M germinated pollen stage, 4 anthesis, C globular stage, petal differentiation and expansion stage; CONTAINS InterPro DOMAIN/s: Immunoglobulin E-set (InterPro:IPR…	0	1	TAIR10	4078913	4080106	-	0	2	0
1	4084260	4085224	MACS_peak_182	141.93	AT1G12080	protein_coding_gene	Vacuolar calcium-binding protein-related	---	Vacuolar calcium-binding protein-related; Has 7161 Blast hits to 3135 proteins in 433 species: Archae - 55; Bacteria - 867; Metazoa - 2008; Fungi - 476; Plants - 327; Viruses - 233; Other Eukaryotes - 3195 (source: NCBI BLink).	0	1	TAIR10	4084162	4085045	+	0	0	0
1	4094932	4096194	MACS_peak_183	67.94	AT1G12100	protein_coding_gene	Bifunctional inhibitor/lipid-transfer protein/seed storage 2S albumin superfamily protein	---	Bifunctional inhibitor/lipid-transfer protein/seed storage 2S albumin superfamily protein; FUNCTIONS IN: lipid binding; INVOLVED IN: lipid transport; LOCATED IN: endomembrane system; EXPRESSED IN: shoot apex, embryo, flower, leaf, seed; EXPRESSED DURING: petal differentiation and expansion stage, E expanded cotyledon stage; CONTAINS InterPro DOMAIN/s: Bifunctional inhibitor/plant lipid transfer p…	0	1	TAIR10	4095246	4095845	+	0	1	0
1	4098564	4099887	MACS_peak_184	53.5	---	---	---	---	---	---	---	---	---	---	---	0	0	0
1	4108232	4109982	MACS_peak_185	147.76	AT1G12110	protein_coding_gene	nitrate transporter 1.1	Encodes NRT1.1 (CHL1), a dual-affinity nitrate transporter. The protein is expressed in guard cells and function in stomatal opening. Mutants have less transpiration and are more tolerant to drought. Expressed in lateral roots. Involved in nitrate signaling which enables the plant root system to detect and exploit nitrate-rich soil patches. Comparing to the wild type, the mutant displays a strong…	nitrate transporter 1.1 (NRT1.1); FUNCTIONS IN: transporter activity, nitrate transmembrane transporter activity; INVOLVED IN: response to water deprivation, nitrate transport, response to nitrate; LOCATED IN: plasma membrane; EXPRESSED IN: 25 plant structures; EXPRESSED DURING: 12 growth stages; CONTAINS InterPro DOMAIN/s: PTR2 family proton/oligopeptide symporter, conserved site (InterPro:IPR01…	0	1	TAIR10	4105233	4109545	+	0	0	0
1	4118544	4119245	MACS_peak_186	67.02	AT1G12130	protein_coding_gene	Flavin-binding monooxygenase family protein	---	Flavin-binding monooxygenase family protein; FUNCTIONS IN: NADP or NADPH binding, monooxygenase activity, FAD binding, flavin-containing monooxygenase activity; INVOLVED IN: oxidation reduction; CONTAINS InterPro DOMAIN/s: Flavin-containing monooxygenase FMO (InterPro:IPR000960), Flavin-containing monooxygenase-like (InterPro:IPR020946); BEST Arabidopsis thaliana protein match is: Flavin-binding …	0	1	TAIR10	4118594	4120871	+	0	0	0
1	4126002	4129829	MACS_peak_187	186.25	AT1G12170	protein_coding_gene	F-box family protein	---	F-box family protein; CONTAINS InterPro DOMAIN/s: F-box domain, cyclin-like (InterPro:IPR001810), F-box domain, Skp2-like (InterPro:IPR022364), F-box associated domain, type 1 (InterPro:IPR006527), F-box associated interaction domain (InterPro:IPR017451); BEST Arabidopsis thaliana protein match is: F-box and associated interaction domains-containing protein (TAIR:AT1G12190.1); Has 1693 Blast hits…	0	1	TAIR10	4128607	4129701	-	1	1	0
1	4130280	4132281	MACS_peak_188	137.13	AT1G12180	protein_coding_gene	---	---	BEST Arabidopsis thaliana protein match is: HSP20-like chaperones superfamily protein (TAIR:AT5G47600.1); Has 8 Blast hits to 8 proteins in 3 species: Archae - 0; Bacteria - 0; Metazoa - 0; Fungi - 0; Plants - 8; Viruses - 0; Other Eukaryotes - 0 (source: NCBI BLink).	0	1	TAIR10	4130421	4131137	+	1	2	0
1	4137179	4140107	MACS_peak_189	310.15	AT1G12200	protein_coding_gene	Flavin-binding monooxygenase family protein	Putative flavin monooxygenase.	Flavin-binding monooxygenase family protein; FUNCTIONS IN: NADP or NADPH binding, monooxygenase activity, FAD binding, flavin-containing monooxygenase activity; INVOLVED IN: oxidation reduction; LOCATED IN: cellular_component unknown; EXPRESSED IN: 22 plant structures; EXPRESSED DURING: 13 growth stages; CONTAINS InterPro DOMAIN/s: Flavin-containing monooxygenase FMO (InterPro:IPR000960), Flavin-…	0	1	TAIR10	4137533	4140028	+	1	1	1
1	4162053	4166565	MACS_peak_190	155.14	AT1G12260	protein_coding_gene	NAC 007	Encodes a NAC-domain transcription factor. Expressed in the vascular tissue.	NAC 007 (NAC007); CONTAINS InterPro DOMAIN/s: No apical meristem (NAM) protein (InterPro:IPR003441); BEST Arabidopsis thaliana protein match is: Arabidopsis NAC domain containing protein 26 (TAIR:AT1G62700.1); Has 3158 Blast hits to 3153 proteins in 90 species: Archae - 0; Bacteria - 0; Metazoa - 15; Fungi - 2; Plants - 3027; Viruses - 0; Other Eukaryotes - 114 (source: NCBI BLink).	0	1	TAIR10	4162832	4165852	-	2	2	0
1	4168238	4170555	MACS_peak_191	98.69	---	---	---	---	---	---	---	---	---	---	---	0	1	0
1	4259919	4262479	MACS_peak_192	586.44	AT1G12490	protein_coding_gene	F-box associated ubiquitination effector family protein	---	F-box associated ubiquitination effector family protein; CONTAINS InterPro DOMAIN/s: F-box associated domain, type 1 (InterPro:IPR006527), F-box associated interaction domain (InterPro:IPR017451); BEST Arabidopsis thaliana protein match is: F-box and associated interaction domains-containing protein (TAIR:AT1G09650.1); Has 239 Blast hits to 239 proteins in 16 species: Archae - 0; Bacteria - 0; Me…	0	1	TAIR10	4260783	4261869	+	0	1	0
1	4276213	4281382	MACS_peak_193	439.88	AT1G12570	protein_coding_gene	Glucose-methanol-choline (GMC) oxidoreductase family protein	---	Glucose-methanol-choline (GMC) oxidoreductase family protein; FUNCTIONS IN: aldehyde-lyase activity, oxidoreductase activity, acting on CH-OH group of donors, FAD binding; INVOLVED IN: alcohol metabolic process; LOCATED IN: endomembrane system; EXPRESSED IN: 17 plant structures; EXPRESSED DURING: 9 growth stages; CONTAINS InterPro DOMAIN/s: Glucose-methanol-choline oxidoreductase, N-terminal (Int…	0	1	TAIR10	4277993	4280862	-	0	3	0
1	4298327	4302313	MACS_peak_194	340.93	AT1G12630	protein_coding_gene	Integrase-type DNA-binding superfamily protein	encodes a member of the DREB subfamily A-4 of ERF/AP2 transcription factor family. The protein contains one AP2 domain. There are 17 members in this subfamily including TINY.	Integrase-type DNA-binding superfamily protein; FUNCTIONS IN: DNA binding, transcription activator activity, sequence-specific DNA binding transcription factor activity; INVOLVED IN: regulation of transcription, DNA-dependent; LOCATED IN: nucleus; CONTAINS InterPro DOMAIN/s: DNA-binding, integrase-type (InterPro:IPR016177), Pathogenesis-related transcriptional factor/ERF, DNA-binding (InterPro:IP…	0	1	TAIR10	4298889	4299475	+	0	2	0
1	4308436	4311459	MACS_peak_195	92.82	AT1G12660	protein_coding_gene	---	Predicted to encode a PR (pathogenesis-related) protein. Belongs to the plant thionin (PR-13) family with the following members: At1g66100, At5g36910, At1g72260, At2g15010, At1g12663, At1g12660.	FUNCTIONS IN: molecular_function unknown; INVOLVED IN: defense response; LOCATED IN: endomembrane system; EXPRESSED IN: central cell; BEST Arabidopsis thaliana protein match is: unknown protein (TAIR:AT1G12663.1); Has 37 Blast hits to 36 proteins in 6 species: Archae - 0; Bacteria - 0; Metazoa - 0; Fungi - 0; Plants - 37; Viruses - 0; Other Eukaryotes - 0 (source: NCBI BLink).	0	1	TAIR10	4308943	4309583	+	0	0	0
1	4317048	4317855	MACS_peak_196	69.81	AT1G12672	protein_coding_gene	---	---	unknown protein; LOCATED IN: endomembrane system; BEST Arabidopsis thaliana protein match is: unknown protein (TAIR:AT1G12663.1); Has 4 Blast hits to 4 proteins in 1 species: Archae - 0; Bacteria - 0; Metazoa - 0; Fungi - 0; Plants - 4; Viruses - 0; Other Eukaryotes - 0 (source: NCBI BLink).	-454	1	TAIR10	4318309	4319090	+	0	0	0
1	4340877	4341897	MACS_peak_197	116.71	AT1G12740	protein_coding_gene	cytochrome P450, family 87, subfamily A, polypeptide 2	encodes a protein with cytochrome P450 domain	cytochrome P450, family 87, subfamily A, polypeptide 2 (CYP87A2); FUNCTIONS IN: electron carrier activity, monooxygenase activity, iron ion binding, oxygen binding, heme binding; INVOLVED IN: oxidation reduction; EXPRESSED IN: root; CONTAINS InterPro DOMAIN/s: Cytochrome P450 (InterPro:IPR001128), Cytochrome P450, conserved site (InterPro:IPR017972), Cytochrome P450, E-class, group I (InterPro:IP…	-385	1	TAIR10	4342282	4344857	+	0	1	0
1	4342118	4343279	MACS_peak_198	101.83	AT1G12740	protein_coding_gene	cytochrome P450, family 87, subfamily A, polypeptide 2	encodes a protein with cytochrome P450 domain	cytochrome P450, family 87, subfamily A, polypeptide 2 (CYP87A2); FUNCTIONS IN: electron carrier activity, monooxygenase activity, iron ion binding, oxygen binding, heme binding; INVOLVED IN: oxidation reduction; EXPRESSED IN: root; CONTAINS InterPro DOMAIN/s: Cytochrome P450 (InterPro:IPR001128), Cytochrome P450, conserved site (InterPro:IPR017972), Cytochrome P450, E-class, group I (InterPro:IP…	0	1	TAIR10	4342282	4344857	+	0	0	0
1	4365628	4367293	MACS_peak_199	660.1	AT1G12810	protein_coding_gene	proline-rich family protein	---	proline-rich family protein; BEST Arabidopsis thaliana protein match is: unknown protein (TAIR:AT2G33520.1); Has 20080 Blast hits to 10426 proteins in 614 species: Archae - 4; Bacteria - 1877; Metazoa - 7835; Fungi - 2952; Plants - 4732; Viruses - 459; Other Eukaryotes - 2221 (source: NCBI BLink).	0	1	TAIR10	4367256	4368822	+	0	2	0
1	4419470	4423213	MACS_peak_200	641.19	AT1G12960	protein_coding_gene	Ribosomal protein L18e/L15 superfamily protein	---	Ribosomal protein L18e/L15 superfamily protein; CONTAINS InterPro DOMAIN/s: Ribosomal protein L18e/L15 (InterPro:IPR021131); BEST Arabidopsis thaliana protein match is: Ribosomal protein L18e/L15 superfamily protein (TAIR:AT1G70600.1); Has 791 Blast hits to 789 proteins in 315 species: Archae - 0; Bacteria - 0; Metazoa - 342; Fungi - 162; Plants - 138; Viruses - 0; Other Eukaryotes - 149 (source:…	0	1	TAIR10	4422707	4423155	-	0	2	0
1	4427688	4431704	MACS_peak_201	343.63	AT1G12980	protein_coding_gene	Integrase-type DNA-binding superfamily protein	Encodes an AP2/ERF protein, is expressed in a subdomain of meristem stem cells, in lateral organ anlagen, and transiently in the distal domain of organ primordia. It is a member of the ERF (ethylene response factor) subfamily B-1 of ERF/AP2 transcription factor family (ESR1). The protein contains one AP2 domain. There are 15 members in this subfamily including ATERF-3, ATERF-4, ATERF-7, and leafy…	ENHANCER OF SHOOT REGENERATION 1 (ESR1); CONTAINS InterPro DOMAIN/s: DNA-binding, integrase-type (InterPro:IPR016177), Pathogenesis-related transcriptional factor/ERF, DNA-binding (InterPro:IPR001471); BEST Arabidopsis thaliana protein match is: DORNROSCHEN-like (TAIR:AT1G24590.1); Has 5974 Blast hits to 5668 proteins in 251 species: Archae - 0; Bacteria - 2; Metazoa - 4; Fungi - 2; Plants - 5957…	0	1	TAIR10	4429718	4430965	+	1	1	1
1	4474286	4475516	MACS_peak_202	157.65	AT1G13130	protein_coding_gene	Cellulase (glycosyl hydrolase family 5) protein	---	Cellulase (glycosyl hydrolase family 5) protein; FUNCTIONS IN: cation binding, hydrolase activity, hydrolyzing O-glycosyl compounds, catalytic activity; INVOLVED IN: carbohydrate metabolic process; LOCATED IN: endomembrane system; EXPRESSED IN: 8 plant structures; EXPRESSED DURING: 4 anthesis, C globular stage, F mature embryo stage, petal differentiation and expansion stage, E expanded cotyledon…	0	1	TAIR10	4474720	4477941	+	0	0	0
1	4476165	4477057	MACS_peak_203	73.05	AT1G13130	protein_coding_gene	Cellulase (glycosyl hydrolase family 5) protein	---	Cellulase (glycosyl hydrolase family 5) protein; FUNCTIONS IN: cation binding, hydrolase activity, hydrolyzing O-glycosyl compounds, catalytic activity; INVOLVED IN: carbohydrate metabolic process; LOCATED IN: endomembrane system; EXPRESSED IN: 8 plant structures; EXPRESSED DURING: 4 anthesis, C globular stage, F mature embryo stage, petal differentiation and expansion stage, E expanded cotyledon…	0	1	TAIR10	4474720	4477941	+	0	0	0
1	4504611	4506354	MACS_peak_204	218.43	---	---	---	---	---	---	---	---	---	---	---	2	1	0
1	4507409	4508663	MACS_peak_205	89	AT1G13200	protein_coding_gene	F-box and associated interaction domains-containing protein	---	F-box and associated interaction domains-containing protein; FUNCTIONS IN: molecular_function unknown; INVOLVED IN: biological_process unknown; LOCATED IN: chloroplast; EXPRESSED IN: sperm cell; CONTAINS InterPro DOMAIN/s: F-box domain, cyclin-like (InterPro:IPR001810), F-box domain, Skp2-like (InterPro:IPR022364), F-box associated domain, type 1 (InterPro:IPR006527), F-box associated interaction…	0	1	TAIR10	4507221	4508528	-	0	0	0
1	4549062	4554107	MACS_peak_206	536.51	AT1G13290	protein_coding_gene	C2H2-like zinc finger protein	Encodes a putative zinc finger protein (C2H2 family, type IIIA, subclass A1d) that has a WIP domain. Seedlings with mutations in DOT5 have a misaligned venation defect in their leaves and cotyledons. Additional developmental abnormalities, such as elongated petioles and aberrant phyllotaxy suggest that DOT5 is required for normal shoot and root development.	DEFECTIVELY ORGANIZED TRIBUTARIES 5 (DOT5); CONTAINS InterPro DOMAIN/s: Zinc finger, C2H2-like (InterPro:IPR015880), Zinc finger, C2H2-type (InterPro:IPR007087); BEST Arabidopsis thaliana protein match is: C2H2-type zinc finger family protein (TAIR:AT3G57670.1); Has 7460 Blast hits to 6100 proteins in 157 species: Archae - 0; Bacteria - 0; Metazoa - 6553; Fungi - 59; Plants - 690; Viruses - 0; Ot…	0	1	TAIR10	4550153	4551620	-	1	3	1
1	4554866	4559999	MACS_peak_207	139.08	AT1G13300	protein_coding_gene	myb-like transcription factor family protein	Overexpression confers hypersensitivity to low phosphate-elicited inhibition of primary root growth.	HYPERSENSITIVITY TO LOW PI-ELICITED PRIMARY ROOT SHORTENING 1 (HRS1); CONTAINS InterPro DOMAIN/s: Homeodomain-like (InterPro:IPR009057), Myb, DNA-binding (InterPro:IPR014778), HTH transcriptional regulator, Myb-type, DNA-binding (InterPro:IPR017930), Myb-like DNA-binding domain, SHAQKYF class (InterPro:IPR006447), Homeodomain-related (InterPro:IPR012287); BEST Arabidopsis thaliana protein match i…	0	1	TAIR10	4556892	4558708	+	1	2	0
1	4587519	4588595	MACS_peak_208	155.15	AT1G13370	protein_coding_gene	Histone superfamily protein	---	Histone superfamily protein; FUNCTIONS IN: DNA binding; INVOLVED IN: nucleosome assembly; LOCATED IN: chloroplast, nucleosome; EXPRESSED IN: root, inflorescence, flower, leaf; EXPRESSED DURING: seedling growth; CONTAINS InterPro DOMAIN/s: Histone H3 (InterPro:IPR000164), Histone-fold (InterPro:IPR009072), Histone core (InterPro:IPR007125); BEST Arabidopsis thaliana protein match is: Histone super…	0	1	TAIR10	4587780	4588613	-	0	1	0
1	4596304	4601161	MACS_peak_209	433.75	AT1G13400	protein_coding_gene	C2H2 and C2HC zinc fingers superfamily protein	Along with JAG, it is involved in stamen and carpel development. Expression is limited to the adaxial side of lateral organs. Activated by AGAMOUS in a cal-1, ap1-1 background.	NUBBIN (NUB); FUNCTIONS IN: zinc ion binding, nucleic acid binding; INVOLVED IN: stamen development, anther development, carpel development; LOCATED IN: intracellular; EXPRESSED IN: 10 plant structures; EXPRESSED DURING: petal differentiation and expansion stage, E expanded cotyledon stage, D bilateral stage; CONTAINS InterPro DOMAIN/s: Zinc finger, C2H2-like (InterPro:IPR015880), Zinc finger, C2…	0	1	TAIR10	4597627	4598911	+	0	2	0
1	4604514	4606048	MACS_peak_210	227.94	AT1G13420	protein_coding_gene	sulfotransferase 4B	Encodes a sulfotransferase. Unlike the related ST4A protein (At2g14920), in vitro experiements show that this enzyme does not act brassinosteroids. ST4B is expressed in the roots and transcript levels rise in response to cytokinin treatment.	sulfotransferase 4B (ST4B); CONTAINS InterPro DOMAIN/s: Sulfotransferase domain (InterPro:IPR000863); BEST Arabidopsis thaliana protein match is: sulfotransferase 4A (TAIR:AT2G14920.1); Has 2771 Blast hits to 2728 proteins in 191 species: Archae - 0; Bacteria - 215; Metazoa - 1679; Fungi - 1; Plants - 543; Viruses - 0; Other Eukaryotes - 333 (source: NCBI BLink).	0	1	TAIR10	4604841	4606053	+	0	0	0
1	4606410	4607660	MACS_peak_211	125	AT1G13430	protein_coding_gene	sulfotransferase 4C	Encodes a sulfotransferase. Unlike the related ST4A protein (At2g14920), in vitro experiements show that this enzyme does not act brassinosteroids. ST4C is expressed in the roots and transcript levels rise in response to cytokinin treatment.	sulfotransferase 4C (ST4C); CONTAINS InterPro DOMAIN/s: Sulfotransferase domain (InterPro:IPR000863); BEST Arabidopsis thaliana protein match is: sulfotransferase 4A (TAIR:AT2G14920.1); Has 2670 Blast hits to 2627 proteins in 170 species: Archae - 0; Bacteria - 153; Metazoa - 1667; Fungi - 1; Plants - 539; Viruses - 0; Other Eukaryotes - 310 (source: NCBI BLink).	0	1	TAIR10	4606500	4607747	+	0	0	0
1	4647269	4648909	MACS_peak_212	138.35	AT1G13590	protein_coding_gene	phytosulfokine 1 precursor	Encodes a phytosulfokine-alpha (PSK) precursor, a unique plant peptide growth factor first described in Asparagus.	phytosulfokine 1 precursor (PSK1); FUNCTIONS IN: growth factor activity; INVOLVED IN: cell growth; LOCATED IN: extracellular matrix; EXPRESSED IN: root; CONTAINS InterPro DOMAIN/s: Phytosulfokine (InterPro:IPR009438); Has 98 Blast hits to 98 proteins in 21 species: Archae - 0; Bacteria - 0; Metazoa - 0; Fungi - 0; Plants - 98; Viruses - 0; Other Eukaryotes - 0 (source: NCBI BLink).	0	1	TAIR10	4647949	4648740	+	0	0	0
1	4650029	4651625	MACS_peak_213	149.01	AT1G13600	protein_coding_gene	basic leucine-zipper 58	---	basic leucine-zipper 58 (bZIP58); FUNCTIONS IN: DNA binding, protein homodimerization activity, protein heterodimerization activity, sequence-specific DNA binding transcription factor activity; INVOLVED IN: regulation of transcription, DNA-dependent; EXPRESSED IN: 16 plant structures; EXPRESSED DURING: 7 growth stages; CONTAINS InterPro DOMAIN/s: Basic-leucine zipper (bZIP) transcription factor (…	0	1	TAIR10	4650787	4651469	-	0	1	0
1	4658371	4659707	MACS_peak_214	79.48	AT1G13605	protein_coding_gene	---	Encodes a defensin-like (DEFL) family protein.	LOCATED IN: endomembrane system; Has 35333 Blast hits to 34131 proteins in 2444 species: Archae - 798; Bacteria - 22429; Metazoa - 974; Fungi - 991; Plants - 531; Viruses - 0; Other Eukaryotes - 9610 (source: NCBI BLink).	0	1	TAIR10	4658538	4659106	+	1	0	0
1	4663833	4666506	MACS_peak_215	147.61	AT1G13610	protein_coding_gene	alpha/beta-Hydrolases superfamily protein	---	alpha/beta-Hydrolases superfamily protein; EXPRESSED IN: cotyledon, hypocotyl, root; CONTAINS InterPro DOMAIN/s: Alpha/beta hydrolase fold-1 (InterPro:IPR000073); BEST Arabidopsis thaliana protein match is: alpha/beta-Hydrolases superfamily protein (TAIR:AT3G30380.2); Has 4490 Blast hits to 4478 proteins in 963 species: Archae - 8; Bacteria - 1669; Metazoa - 672; Fungi - 266; Plants - 333; Viruse…	0	1	TAIR10	4663831	4666031	-	1	0	0
1	4668125	4669359	MACS_peak_216	127.72	AT1G13620	protein_coding_gene	---	Encodes a root meristem growth factor (RGF). Belongs to a family of functionally redundant homologous peptides that are secreted, tyrosine-sulfated, and expressed mainly in the stem cell area and the innermost layer of central columella cells. RGFs are required for maintenance of the root stem cell niche and transit amplifying cell proliferation. Members of this family include: At5g60810 (RGF1), …	root meristem growth factor 2 (RGF2); FUNCTIONS IN: molecular_function unknown; INVOLVED IN: regulation of root meristem growth, positive regulation of gene expression; LOCATED IN: endomembrane system; BEST Arabidopsis thaliana protein match is: unknown protein (TAIR:AT2G04025.1); Has 11 Blast hits to 11 proteins in 2 species: Archae - 0; Bacteria - 0; Metazoa - 0; Fungi - 0; Plants - 11; Viruses…	0	1	TAIR10	4668443	4669471	+	1	0	0
1	4687578	4689946	MACS_peak_217	133.19	AT1G13670	protein_coding_gene	---	---	unknown protein; Has 22 Blast hits to 22 proteins in 7 species: Archae - 0; Bacteria - 0; Metazoa - 0; Fungi - 0; Plants - 22; Viruses - 0; Other Eukaryotes - 0 (source: NCBI BLink).	0	1	TAIR10	4688156	4688966	+	0	1	1
1	4690160	4692833	MACS_peak_218	114.38	AT1G13680	protein_coding_gene	PLC-like phosphodiesterases superfamily protein	---	PLC-like phosphodiesterases superfamily protein; FUNCTIONS IN: phospholipase C activity, phosphoric diester hydrolase activity; INVOLVED IN: intracellular signaling pathway, lipid metabolic process; LOCATED IN: endomembrane system; EXPRESSED IN: embryo, flower, seed; EXPRESSED DURING: F mature embryo stage, petal differentiation and expansion stage, E expanded cotyledon stage, D bilateral stage; …	0	1	TAIR10	4690409	4692841	+	0	1	0
1	4699691	4705220	MACS_peak_219	342.64	AT1G13710	protein_coding_gene	cytochrome P450, family 78, subfamily A, polypeptide 5	Encodes the cytochrome P450 CYP78A5 monooxygenase. Contributes to the generation of a growth-stimulating signal distinct from the classical phytohormones that prevents proliferation arrest, promoting organ growth.	cytochrome P450, family 78, subfamily A, polypeptide 5 (CYP78A5); FUNCTIONS IN: electron carrier activity, monooxygenase activity, iron ion binding, oxygen binding, heme binding; INVOLVED IN: in 7 processes; LOCATED IN: endoplasmic reticulum; EXPRESSED IN: 10 plant structures; EXPRESSED DURING: F mature embryo stage, petal differentiation and expansion stage, E expanded cotyledon stage, D bilater…	0	1	TAIR10	4702725	4704657	-	1	1	1
1	4741887	4743172	MACS_peak_220	257.27	AT1G13850	tRNA	pre-tRNA	---	tRNA-Ala (anticodon: TGC)	0	1	TAIR10	4743095	4743167	+	0	1	0
1	4807987	4811394	MACS_peak_221	346.37	AT1G14040	protein_coding_gene	EXS (ERD1/XPR1/SYG1) family protein	---	EXS (ERD1/XPR1/SYG1) family protein; LOCATED IN: integral to membrane; EXPRESSED IN: 21 plant structures; EXPRESSED DURING: 12 growth stages; CONTAINS InterPro DOMAIN/s: SPX, N-terminal (InterPro:IPR004331), EXS, C-terminal (InterPro:IPR004342); BEST Arabidopsis thaliana protein match is: EXS (ERD1/XPR1/SYG1) family protein (TAIR:AT2G03240.1); Has 1168 Blast hits to 1094 proteins in 207 species: …	0	1	TAIR10	4810488	4814543	+	0	3	0
1	4830074	4835414	MACS_peak_222	277.78	AT1G14120	protein_coding_gene	2-oxoglutarate (2OG) and Fe(II)-dependent oxygenase superfamily protein	---	2-oxoglutarate (2OG) and Fe(II)-dependent oxygenase superfamily protein; FUNCTIONS IN: oxidoreductase activity, acting on paired donors, with incorporation or reduction of molecular oxygen, 2-oxoglutarate as one donor, and incorporation of one atom each of oxygen into both donors, oxidoreductase activity; INVOLVED IN: biological_process unknown; LOCATED IN: cellular_component unknown; EXPRESSED I…	0	1	TAIR10	4833518	4835089	-	0	2	1
1	4858573	4859945	MACS_peak_223	164.31	AT1G14220	protein_coding_gene	Ribonuclease T2 family protein	---	Ribonuclease T2 family protein; FUNCTIONS IN: ribonuclease T2 activity, endoribonuclease activity, RNA binding; INVOLVED IN: N-terminal protein myristoylation; LOCATED IN: endomembrane system; EXPRESSED IN: sperm cell, root, egg cell; CONTAINS InterPro DOMAIN/s: Ribonuclease T2 (InterPro:IPR001568), Ribonuclease T2, active site (InterPro:IPR018188); BEST Arabidopsis thaliana protein match is: rib…	0	1	TAIR10	4858642	4859601	-	0	0	0
1	4864984	4867811	MACS_peak_224	226.96	AT1G14240	protein_coding_gene	GDA1/CD39 nucleoside phosphatase family protein	---	GDA1/CD39 nucleoside phosphatase family protein; FUNCTIONS IN: hydrolase activity; INVOLVED IN: biological_process unknown; LOCATED IN: cellular_component unknown; EXPRESSED IN: 20 plant structures; EXPRESSED DURING: 11 growth stages; CONTAINS InterPro DOMAIN/s: Nucleoside phosphatase GDA1/CD39 (InterPro:IPR000407); BEST Arabidopsis thaliana protein match is: GDA1/CD39 nucleoside phosphatase fami…	0	1	TAIR10	4864902	4868000	+	1	0	0
1	4901694	4902863	MACS_peak_225	149.98	---	---	---	---	---	---	---	---	---	---	---	0	0	0
1	4977011	4980475	MACS_peak_226	697.74	AT1G14550	protein_coding_gene	Peroxidase superfamily protein	---	Peroxidase superfamily protein; FUNCTIONS IN: peroxidase activity, heme binding; INVOLVED IN: oxidation reduction, response to oxidative stress; LOCATED IN: endomembrane system; EXPRESSED IN: root; CONTAINS InterPro DOMAIN/s: Haem peroxidase (InterPro:IPR010255), Plant peroxidase (InterPro:IPR000823), Peroxidases heam-ligand binding site (InterPro:IPR019793), Haem peroxidase, plant/fungal/bacteri…	0	1	TAIR10	4979028	4980324	+	1	2	0
1	4989765	4993500	MACS_peak_227	370.36	AT1G14580	protein_coding_gene	C2H2-like zinc finger protein	---	C2H2-like zinc finger protein; FUNCTIONS IN: sequence-specific DNA binding transcription factor activity, zinc ion binding, nucleic acid binding; LOCATED IN: intracellular; EXPRESSED IN: 7 plant structures; EXPRESSED DURING: LP.04 four leaves visible, LP.10 ten leaves visible, LP.02 two leaves visible, 4 leaf senescence stage; CONTAINS InterPro DOMAIN/s: Zinc finger, C2H2-like (InterPro:IPR015880…	0	1	TAIR10	4989562	4992732	+	0	1	2
1	5002359	5003667	MACS_peak_228	53.9	AT1G14600	protein_coding_gene	Homeodomain-like superfamily protein	---	Homeodomain-like superfamily protein; CONTAINS InterPro DOMAIN/s: Myb, DNA-binding (InterPro:IPR014778), Homeodomain-like (InterPro:IPR009057), Homeodomain-related (InterPro:IPR012287), HTH transcriptional regulator, Myb-type, DNA-binding (InterPro:IPR017930), Myb-like DNA-binding domain, SHAQKYF class (InterPro:IPR006447); BEST Arabidopsis thaliana protein match is: Homeodomain-like superfamily …	0	1	TAIR10	5001011	5003370	-	0	1	0
1	5019561	5021384	MACS_peak_229	127	AT1G14630	protein_coding_gene	---	---	unknown protein; BEST Arabidopsis thaliana protein match is: unknown protein (TAIR:AT2G01990.1); Has 125 Blast hits to 123 proteins in 14 species: Archae - 0; Bacteria - 0; Metazoa - 0; Fungi - 0; Plants - 125; Viruses - 0; Other Eukaryotes - 0 (source: NCBI BLink).	0	1	TAIR10	5019955	5021537	+	0	0	0
1	5084318	5086413	MACS_peak_230	517.44	AT1G14760	protein_coding_gene	KNOX Arabidopsis thaliana meinox	Encodes a novel Arabidopsis KNOX gene that encodes a MEINOX domain but lacks the homeodomain and interacts with TALE-class homeodomain proteins to modulate their activities	KNOX Arabidopsis thaliana meinox (KNATM); CONTAINS InterPro DOMAIN/s: KNOX1 (InterPro:IPR005540); Has 38 Blast hits to 38 proteins in 13 species: Archae - 0; Bacteria - 0; Metazoa - 0; Fungi - 0; Plants - 38; Viruses - 0; Other Eukaryotes - 0 (source: NCBI BLink).	0	1	TAIR10	5084352	5085213	-	0	1	0
1	5092184	5094079	MACS_peak_231	293.7	AT1G14790	protein_coding_gene	RNA-dependent RNA polymerase 1	Encodes RNA-dependent RNA polymerase. While not required for virus-induced post-transcriptional gene silencing (PTGS), it can promote turnover of viral RNAs in infected plants. Nomenclature according to Xie, et al. (2004). Involved in the production of Cucumber Mosaic Virus siRNAs.	RNA-dependent RNA polymerase 1 (RDR1); CONTAINS InterPro DOMAIN/s: RNA-dependent RNA polymerase, eukaryotic-type (InterPro:IPR007855); BEST Arabidopsis thaliana protein match is: RNA-dependent RNA polymerase 2 (TAIR:AT4G11130.1); Has 638 Blast hits to 623 proteins in 115 species: Archae - 0; Bacteria - 2; Metazoa - 73; Fungi - 286; Plants - 205; Viruses - 2; Other Eukaryotes - 70 (source: NCBI BL…	0	1	TAIR10	5093961	5098032	-	0	0	0
1	5125362	5126223	MACS_peak_232	51.7	AT1G14860	protein_coding_gene	nudix hydrolase homolog 18	---	nudix hydrolase homolog 18 (NUDT18); FUNCTIONS IN: hydrolase activity; INVOLVED IN: biological_process unknown; CONTAINS InterPro DOMAIN/s: NUDIX hydrolase domain-like (InterPro:IPR015797), NUDIX hydrolase, conserved site (InterPro:IPR020084), NUDIX hydrolase domain (InterPro:IPR000086); BEST Arabidopsis thaliana protein match is: nudix hydrolase homolog 17 (TAIR:AT2G01670.1); Has 1011 Blast hits…	0	1	TAIR10	5124742	5126151	+	0	0	0
1	5128288	5129552	MACS_peak_233	60.38	AT1G14870	protein_coding_gene	PLANT CADMIUM RESISTANCE 2	PCR2 encodes a membrane protein involved in zinc transport and detoxification.	PLANT CADMIUM RESISTANCE 2 (PCR2); FUNCTIONS IN: molecular_function unknown; INVOLVED IN: response to oxidative stress; LOCATED IN: plasma membrane; EXPRESSED IN: callus; CONTAINS InterPro DOMAIN/s: Protein of unknown function Cys-rich (InterPro:IPR006461); BEST Arabidopsis thaliana protein match is: PLAC8 family protein (TAIR:AT5G35525.1); Has 803 Blast hits to 802 proteins in 112 species: Archa…	0	1	TAIR10	5128375	5129523	-	0	0	0
1	5132569	5133853	MACS_peak_234	73.48	AT1G14880	protein_coding_gene	PLANT CADMIUM RESISTANCE 1	---	PLANT CADMIUM RESISTANCE 1 (PCR1); FUNCTIONS IN: molecular_function unknown; INVOLVED IN: biological_process unknown; LOCATED IN: vacuole; CONTAINS InterPro DOMAIN/s: Protein of unknown function Cys-rich (InterPro:IPR006461); BEST Arabidopsis thaliana protein match is: PLANT CADMIUM RESISTANCE 2 (TAIR:AT1G14870.1); Has 778 Blast hits to 777 proteins in 111 species: Archae - 0; Bacteria - 0; Metaz…	0	1	TAIR10	5132535	5133716	-	0	0	0
1	5136758	5137973	MACS_peak_235	111.31	AT1G14890	protein_coding_gene	Plant invertase/pectin methylesterase inhibitor superfamily protein	---	Plant invertase/pectin methylesterase inhibitor superfamily protein; FUNCTIONS IN: enzyme inhibitor activity, pectinesterase inhibitor activity, pectinesterase activity; INVOLVED IN: biological_process unknown; EXPRESSED IN: 22 plant structures; EXPRESSED DURING: 13 growth stages; CONTAINS InterPro DOMAIN/s: Pectinesterase inhibitor (InterPro:IPR006501); BEST Arabidopsis thaliana protein match is…	0	1	TAIR10	5137014	5137957	+	0	1	0
1	5152072	5160609	MACS_peak_236	53.38	AT1G14960	protein_coding_gene	Polyketide cyclase/dehydrase and lipid transport superfamily protein	---	Polyketide cyclase/dehydrase and lipid transport superfamily protein; FUNCTIONS IN: molecular_function unknown; INVOLVED IN: response to biotic stimulus, defense response; LOCATED IN: cellular_component unknown; EXPRESSED IN: root; CONTAINS InterPro DOMAIN/s: Bet v I allergen (InterPro:IPR000916); BEST Arabidopsis thaliana protein match is: Polyketide cyclase/dehydrase and lipid transport superfa…	0	1	TAIR10	5159199	5160083	-	1	2	1
1	5190846	5192504	MACS_peak_237	216.31	---	---	---	---	---	---	---	---	---	---	---	0	0	0
1	5272025	5275265	MACS_peak_238	426.6	AT1G15330	protein_coding_gene	Cystathionine beta-synthase (CBS) protein	---	Cystathionine beta-synthase (CBS) protein; CONTAINS InterPro DOMAIN/s: Cystathionine beta-synthase, core (InterPro:IPR000644); BEST Arabidopsis thaliana protein match is: Cystathionine beta-synthase (CBS) family protein (TAIR:AT1G80090.1); Has 526 Blast hits to 526 proteins in 132 species: Archae - 6; Bacteria - 4; Metazoa - 257; Fungi - 91; Plants - 124; Viruses - 0; Other Eukaryotes - 44 (sourc…	0	1	TAIR10	5274346	5275602	+	0	0	0
1	5280035	5281924	MACS_peak_239	53.86	AT1G15350	protein_coding_gene	---	---	unknown protein; BEST Arabidopsis thaliana protein match is: unknown protein (TAIR:AT3G15770.2); Has 148 Blast hits to 148 proteins in 25 species: Archae - 0; Bacteria - 0; Metazoa - 0; Fungi - 0; Plants - 141; Viruses - 0; Other Eukaryotes - 7 (source: NCBI BLink).	-159	1	TAIR10	5278260	5279877	-	0	1	0
1	5282710	5286531	MACS_peak_240	281.85	AT1G15360	protein_coding_gene	Integrase-type DNA-binding superfamily protein	Encodes a member of the ERF (ethylene response factor) subfamily B-6 of ERF/AP2 transcription factor family. The protein contains one AP2 domain. There are 12 members in this subfamily including RAP2.11. This gene is involved in wax biosynthesis. Over-expression of the gene results in glossy leaf phenotype and increased drought tolerance. Two closely related genes, AT5G25390 and AT5G11190 have si…	SHINE 1 (SHN1); CONTAINS InterPro DOMAIN/s: DNA-binding, integrase-type (InterPro:IPR016177), Pathogenesis-related transcriptional factor/ERF, DNA-binding (InterPro:IPR001471); BEST Arabidopsis thaliana protein match is: Integrase-type DNA-binding superfamily protein (TAIR:AT5G25390.2); Has 5918 Blast hits to 5765 proteins in 265 species: Archae - 0; Bacteria - 6; Metazoa - 9; Fungi - 23; Plants …	0	1	TAIR10	5283538	5284673	+	1	1	0
1	5291722	5293384	MACS_peak_241	151.17	AT1G15380	protein_coding_gene	Lactoylglutathione lyase / glyoxalase I family protein	---	Lactoylglutathione lyase / glyoxalase I family protein; CONTAINS InterPro DOMAIN/s: Glyoxalase/bleomycin resistance protein/dioxygenase (InterPro:IPR004360); BEST Arabidopsis thaliana protein match is: Lactoylglutathione lyase / glyoxalase I family protein (TAIR:AT1G80160.1); Has 780 Blast hits to 780 proteins in 276 species: Archae - 1; Bacteria - 484; Metazoa - 4; Fungi - 2; Plants - 222; Virus…	0	1	TAIR10	5290745	5292535	+	0	1	0
1	5314417	5315219	MACS_peak_242	100.1	AT1G15470	protein_coding_gene	Transducin/WD40 repeat-like superfamily protein	---	Transducin/WD40 repeat-like superfamily protein; CONTAINS InterPro DOMAIN/s: WD40 repeat 2 (InterPro:IPR019782), WD40 repeat-like-containing domain (InterPro:IPR011046), WD40 repeat, conserved site (InterPro:IPR019775), WD40-repeat-containing domain (InterPro:IPR017986), WD40/YVTN repeat-like-containing domain (InterPro:IPR015943), WD40 repeat (InterPro:IPR001680), WD40 repeat, subgroup (InterPro…	-288	1	TAIR10	5315507	5317863	+	0	0	0
1	5342316	5343839	MACS_peak_243	290.28	AT1G15540	protein_coding_gene	2-oxoglutarate (2OG) and Fe(II)-dependent oxygenase superfamily protein	---	2-oxoglutarate (2OG) and Fe(II)-dependent oxygenase superfamily protein; FUNCTIONS IN: oxidoreductase activity; INVOLVED IN: N-terminal protein myristoylation; CONTAINS InterPro DOMAIN/s: Oxoglutarate/iron-dependent oxygenase (InterPro:IPR005123); BEST Arabidopsis thaliana protein match is: 2-oxoglutarate (2OG) and Fe(II)-dependent oxygenase superfamily protein (TAIR:AT1G80320.1); Has 4520 Blast …	0	1	TAIR10	5342587	5343705	+	0	0	0
1	5352513	5353345	MACS_peak_244	90.23	---	---	---	---	---	---	---	---	---	---	---	0	0	0
1	5367040	5369881	MACS_peak_245	244.5	AT1G15600	protein_coding_gene	---	---	unknown protein; BEST Arabidopsis thaliana protein match is: unknown protein (TAIR:AT1G15620.1); Has 227 Blast hits to 227 proteins in 15 species: Archae - 0; Bacteria - 0; Metazoa - 0; Fungi - 0; Plants - 227; Viruses - 0; Other Eukaryotes - 0 (source: NCBI BLink).	0	1	TAIR10	5368923	5370344	+	1	0	0
1	5376453	5378439	MACS_peak_246	56.01	AT1G15630	protein_coding_gene	---	---	unknown protein; BEST Arabidopsis thaliana protein match is: unknown protein (TAIR:AT1G15610.1); Has 122 Blast hits to 122 proteins in 14 species: Archae - 0; Bacteria - 0; Metazoa - 0; Fungi - 0; Plants - 122; Viruses - 0; Other Eukaryotes - 0 (source: NCBI BLink).	0	1	TAIR10	5376793	5378027	+	0	0	0
1	5393193	5395346	MACS_peak_247	852.34	AT1G15680	protein_coding_gene	F-box family protein	---	F-box family protein; CONTAINS InterPro DOMAIN/s: F-box domain, cyclin-like (InterPro:IPR001810), F-box domain, Skp2-like (InterPro:IPR022364); BEST Arabidopsis thaliana protein match is: F-box family protein (TAIR:AT1G49990.1); Has 875 Blast hits to 870 proteins in 38 species: Archae - 0; Bacteria - 0; Metazoa - 0; Fungi - 0; Plants - 875; Viruses - 0; Other Eukaryotes - 0 (source: NCBI BLink).	0	1	TAIR10	5393407	5394639	+	1	1	1
1	5451205	5452396	MACS_peak_248	372.47	AT1G15840	protein_coding_gene	---	---	unknown protein; Has 111484 Blast hits to 29940 proteins in 1985 species: Archae - 153; Bacteria - 40635; Metazoa - 31564; Fungi - 6444; Plants - 10232; Viruses - 1710; Other Eukaryotes - 20746 (source: NCBI BLink).	0	1	TAIR10	5451432	5452374	+	0	1	0
1	5571739	5572795	MACS_peak_249	122.71	AT1G16290	protein_coding_gene	---	---	FUNCTIONS IN: molecular_function unknown; INVOLVED IN: biological_process unknown; LOCATED IN: chloroplast, vacuole; EXPRESSED IN: 19 plant structures; EXPRESSED DURING: 11 growth stages; CONTAINS InterPro DOMAIN/s: Lytic transglycosylase-like, catalytic (InterPro:IPR008258); Has 171 Blast hits to 155 proteins in 40 species: Archae - 0; Bacteria - 54; Metazoa - 0; Fungi - 0; Plants - 55; Viruses …	0	1	TAIR10	5570753	5573538	-	1	0	0
1	5632502	5633296	MACS_peak_250	51.8	---	---	---	---	---	---	---	---	---	---	---	1	0	0
1	5633608	5634760	MACS_peak_251	84.43	---	---	---	---	---	---	---	---	---	---	---	0	0	0
1	5651340	5653753	MACS_peak_252	211.34	AT1G16530	protein_coding_gene	ASYMMETRIC LEAVES 2-like 9	---	ASYMMETRIC LEAVES 2-like 9 (ASL9); CONTAINS InterPro DOMAIN/s: Lateral organ boundaries, LOB (InterPro:IPR004883); BEST Arabidopsis thaliana protein match is: Lateral organ boundaries (LOB) domain family protein (TAIR:AT2G30130.1); Has 986 Blast hits to 981 proteins in 24 species: Archae - 0; Bacteria - 0; Metazoa - 0; Fungi - 0; Plants - 986; Viruses - 0; Other Eukaryotes - 0 (source: NCBI BLink…	0	1	TAIR10	5651370	5652883	-	0	3	0
1	5782672	5784698	MACS_peak_253	393.05	AT1G16905	protein_coding_gene	Curculin-like (mannose-binding) lectin family protein	---	Curculin-like (mannose-binding) lectin family protein; FUNCTIONS IN: sugar binding; INVOLVED IN: biological_process unknown; LOCATED IN: endomembrane system; CONTAINS InterPro DOMAIN/s: Curculin-like (mannose-binding) lectin (InterPro:IPR001480); BEST Arabidopsis thaliana protein match is: D-mannose binding lectin protein with Apple-like carbohydrate-binding domain (TAIR:AT1G78860.1); Has 30201 B…	0	1	TAIR10	5782455	5783840	-	0	1	0
1	5784850	5786211	MACS_peak_254	57.34	AT1G16910	protein_coding_gene	Protein of unknown function (DUF640)	---	LIGHT SENSITIVE HYPOCOTYLS 8 (LSH8); CONTAINS InterPro DOMAIN/s: Protein of unknown function DUF640 (InterPro:IPR006936); BEST Arabidopsis thaliana protein match is: Protein of unknown function (DUF640) (TAIR:AT1G78815.1); Has 310 Blast hits to 310 proteins in 18 species: Archae - 0; Bacteria - 0; Metazoa - 14; Fungi - 0; Plants - 296; Viruses - 0; Other Eukaryotes - 0 (source: NCBI BLink).	0	1	TAIR10	5785003	5785927	+	0	1	0
1	5789699	5794878	MACS_peak_255	138.01	AT1G16940	protein_coding_gene	F-box/RNI-like/FBD-like domains-containing protein	---	F-box/RNI-like/FBD-like domains-containing protein; CONTAINS InterPro DOMAIN/s: F-box domain, cyclin-like (InterPro:IPR001810), FBD (InterPro:IPR013596), F-box domain, Skp2-like (InterPro:IPR022364), FBD-like (InterPro:IPR006566); BEST Arabidopsis thaliana protein match is: F-box/RNI-like superfamily protein (TAIR:AT1G78750.1); Has 1457 Blast hits to 1436 proteins in 34 species: Archae - 0; Bacte…	0	1	TAIR10	5791983	5793491	+	3	3	0
1	5817258	5819203	MACS_peak_256	149.52	AT1G17010	protein_coding_gene	2-oxoglutarate (2OG) and Fe(II)-dependent oxygenase superfamily protein	---	2-oxoglutarate (2OG) and Fe(II)-dependent oxygenase superfamily protein; FUNCTIONS IN: oxidoreductase activity, acting on paired donors, with incorporation or reduction of molecular oxygen, 2-oxoglutarate as one donor, and incorporation of one atom each of oxygen into both donors, oxidoreductase activity, iron ion binding; INVOLVED IN: oxidation reduction, flavonoid biosynthetic process; LOCATED …	0	1	TAIR10	5817567	5819352	+	0	0	0
1	5834577	5836133	MACS_peak_257	277.9	AT1G17060	protein_coding_gene	cytochrome p450 72c1	Encodes a protein with similarity to other cytochrome P450's and is a homolog of BAS1. Over expression causes a dwarf phenotype resembling brassinolide resistant mutants. Double mutant analysis of sob7/bas1 loss of function mutants suggests these genes have redundant functions in light responsiveness. SOB7 may function in metabolizing brassinolides. Expressed in leaf, root, stem and silique but e…	cytochrome p450 72c1 (CYP72C1); FUNCTIONS IN: electron carrier activity, monooxygenase activity, iron ion binding, oxygen binding, heme binding; INVOLVED IN: response to light stimulus, brassinosteroid metabolic process, unidimensional cell growth; LOCATED IN: endomembrane system; EXPRESSED IN: 10 plant structures; EXPRESSED DURING: 6 growth stages; CONTAINS InterPro DOMAIN/s: Cytochrome P450 (In…	0	1	TAIR10	5832097	5835456	-	0	0	0
1	5865314	5866650	MACS_peak_258	83.27	AT1G17150	protein_coding_gene	Pectin lyase-like superfamily protein	---	Pectin lyase-like superfamily protein; FUNCTIONS IN: polygalacturonase activity; INVOLVED IN: carbohydrate metabolic process; LOCATED IN: endomembrane system; CONTAINS InterPro DOMAIN/s: Pectin lyase fold/virulence factor (InterPro:IPR011050), Pectin lyase fold (InterPro:IPR012334), Glycoside hydrolase, family 28 (InterPro:IPR000743); BEST Arabidopsis thaliana protein match is: Pectin lyase-like …	0	1	TAIR10	5865707	5867495	+	0	0	0
1	5874652	5876660	MACS_peak_259	167.94	AT1G17190	protein_coding_gene	glutathione S-transferase tau 26	Encodes glutathione transferase belonging to the tau class of GSTs. Naming convention according to Wagner et al. (2002).	glutathione S-transferase tau 26 (GSTU26); CONTAINS InterPro DOMAIN/s: Thioredoxin fold (InterPro:IPR012335), Glutathione S-transferase, C-terminal (InterPro:IPR004046), Glutathione S-transferase, C-terminal-like (InterPro:IPR010987), Glutathione S-transferase/chloride channel, C-terminal (InterPro:IPR017933), Glutathione S-transferase, N-terminal (InterPro:IPR004045), Thioredoxin-like fold (Inte…	0	1	TAIR10	5875350	5876545	+	0	0	0
1	5877990	5879074	MACS_peak_260	55.17	AT1G17200	protein_coding_gene	Uncharacterised protein family (UPF0497)	---	Uncharacterised protein family (UPF0497); CONTAINS InterPro DOMAIN/s: Uncharacterised protein family UPF0497, trans-membrane plant (InterPro:IPR006702), Uncharacterised protein family UPF0497, trans-membrane plant subgroup (InterPro:IPR006459); BEST Arabidopsis thaliana protein match is: Uncharacterised protein family (UPF0497) (TAIR:AT3G14380.1); Has 681 Blast hits to 681 proteins in 21 species:…	0	1	TAIR10	5878400	5880041	+	0	0	0
1	5926798	5929050	MACS_peak_261	370.97	AT1G17310	protein_coding_gene	MADS-box transcription factor family protein	---	MADS-box transcription factor family protein; FUNCTIONS IN: DNA binding, sequence-specific DNA binding transcription factor activity; INVOLVED IN: regulation of transcription, DNA-dependent; LOCATED IN: nucleus; EXPRESSED IN: antipodal cell, sperm cell, carpel, female gametophyte; EXPRESSED DURING: 4 anthesis; CONTAINS InterPro DOMAIN/s: Transcription factor, MADS-box (InterPro:IPR002100); BEST A…	0	1	TAIR10	5928014	5928667	-	0	1	0
1	5932630	5933608	MACS_peak_262	71.55	AT1G17340	protein_coding_gene	Phosphoinositide phosphatase family protein	---	Phosphoinositide phosphatase family protein; CONTAINS InterPro DOMAIN/s: Synaptojanin, N-terminal (InterPro:IPR002013); BEST Arabidopsis thaliana protein match is: Phosphoinositide phosphatase family protein (TAIR:AT3G14205.1); Has 1726 Blast hits to 1665 proteins in 230 species: Archae - 0; Bacteria - 0; Metazoa - 581; Fungi - 579; Plants - 272; Viruses - 0; Other Eukaryotes - 294 (source: NCBI …	-262	1	TAIR10	5933870	5938761	+	0	0	0
1	5940016	5941497	MACS_peak_263	363.48	AT1G17345	protein_coding_gene	SAUR-like auxin-responsive protein family	---	SAUR-like auxin-responsive protein family ; CONTAINS InterPro DOMAIN/s: Auxin responsive SAUR protein (InterPro:IPR003676); BEST Arabidopsis thaliana protein match is: SAUR-like auxin-responsive protein family (TAIR:AT1G72430.1); Has 128 Blast hits to 128 proteins in 13 species: Archae - 0; Bacteria - 0; Metazoa - 0; Fungi - 0; Plants - 128; Viruses - 0; Other Eukaryotes - 0 (source: NCBI BLink).	0	1	TAIR10	5940423	5941210	+	0	0	0
1	5980071	5981408	MACS_peak_264	162.13	AT1G17420	protein_coding_gene	lipoxygenase 3	LOX3 encode a Lipoxygenase. Lipoxygenases (LOXs) catalyze the oxygenation of fatty acids (FAs).	lipoxygenase 3 (LOX3); FUNCTIONS IN: oxidoreductase activity, acting on single donors with incorporation of molecular oxygen, incorporation of two atoms of oxygen, lipoxygenase activity, iron ion binding, metal ion binding; INVOLVED IN: growth, response to fungus, jasmonic acid biosynthetic process, response to wounding, defense response; LOCATED IN: chloroplast; EXPRESSED IN: 22 plant structures…	0	1	TAIR10	5977411	5981480	+	0	1	0
1	6089178	6092132	MACS_peak_265	422.54	AT1G17710	protein_coding_gene	Pyridoxal phosphate phosphatase-related protein	Encodes a phosphoethanolamine/phosphocholine phosphatase. It is likely to be involved in the liberation of inorganic phosphate from intracellular sources. Expression is upregulated in the shoot of cax1/cax3 mutant.	Pyridoxal phosphate phosphatase-related protein; FUNCTIONS IN: phosphatase activity; INVOLVED IN: metabolic process; EXPRESSED IN: 9 plant structures; EXPRESSED DURING: L mature pollen stage, M germinated pollen stage, 4 anthesis, petal differentiation and expansion stage; CONTAINS InterPro DOMAIN/s: Pyridoxal phosphate phosphatase, PHOSPHO2 (InterPro:IPR016965), HAD-superfamily hydrolase, subfam…	0	1	TAIR10	6090560	6092027	-	1	0	0
1	6117016	6118154	MACS_peak_266	105.61	AT1G17760	protein_coding_gene	Tetratricopeptide repeat (TPR)-like superfamily protein	Encodes a homolog of the mammalian protein CstF77, a polyadenylation factor subunit. RNA 3&#8242;-end?processing factor of antisense FLC transcript. Mediates silencing of the floral repressor gene FLC.	CSTF77; FUNCTIONS IN: protein binding, mRNA binding, transcription repressor activity; INVOLVED IN: RNA 3'-end processing, mRNA processing, embryo sac development; LOCATED IN: intracellular, nucleus; EXPRESSED IN: 23 plant structures; EXPRESSED DURING: 12 growth stages; CONTAINS InterPro DOMAIN/s: RNA-processing protein, HAT helix (InterPro:IPR003107), Tetratricopeptide-like helical (InterPro:IPR…	-400	1	TAIR10	6110107	6116617	-	0	0	0
1	6120514	6122853	MACS_peak_267	239.14	AT1G17770	protein_coding_gene	SU(VAR)3-9 homolog 7	Encodes a SU(VAR)3-9 homolog, a SET domain protein. Known SET domain proteins are involved in epigenetic control of gene expression and act as histone methyltransferases. There are 10 SUVH genes in Arabidopsis and members of this subfamily of the SET proteins have an additional conserved SRA domain. A paternally expressed imprinted gene.	SU(VAR)3-9 homolog 7 (SUVH7); FUNCTIONS IN: zinc ion binding, histone-lysine N-methyltransferase activity; INVOLVED IN: chromatin modification; LOCATED IN: nucleus; CONTAINS InterPro DOMAIN/s: SET domain (InterPro:IPR001214), SRA-YDG (InterPro:IPR003105), Pre-SET zinc-binding sub-group (InterPro:IPR003606), Post-SET domain (InterPro:IPR003616), Pre-SET domain (InterPro:IPR007728); BEST Arabidopsi…	0	1	TAIR10	6120741	6122822	+	1	0	0
1	6128560	6129432	MACS_peak_268	60.69	AT1G17800	protein_coding_gene	early nodulin-like protein 22	---	early nodulin-like protein 22 (ENODL22); FUNCTIONS IN: electron carrier activity, copper ion binding; LOCATED IN: endomembrane system; EXPRESSED IN: 7 plant structures; EXPRESSED DURING: 4 anthesis, LP.02 two leaves visible, 4 leaf senescence stage, LP.12 twelve leaves visible; CONTAINS InterPro DOMAIN/s: Plastocyanin-like (InterPro:IPR003245), Cupredoxin (InterPro:IPR008972); BEST Arabidopsis th…	0	1	TAIR10	6128823	6129508	+	1	0	0
1	6129694	6130636	MACS_peak_269	76.43	AT1G17810	protein_coding_gene	beta-tonoplast intrinsic protein	beta-tonoplast intrinsic protein (beta-TIP) mRNA, complete	beta-tonoplast intrinsic protein (BETA-TIP); FUNCTIONS IN: water channel activity; INVOLVED IN: transport, transmembrane transport; LOCATED IN: integral to membrane, membrane; EXPRESSED DURING: seedling growth; CONTAINS InterPro DOMAIN/s: Major intrinsic protein, conserved site (InterPro:IPR022357), Aquaporin (InterPro:IPR012269), Major intrinsic protein (InterPro:IPR000425); BEST Arabidopsis tha…	0	1	TAIR10	6130025	6131627	+	0	0	0
1	6175067	6180871	MACS_peak_270	139.8	AT1G17950	protein_coding_gene	myb domain protein 52	putative transcription factor: R2R3-MYB transcription family	myb domain protein 52 (MYB52); CONTAINS InterPro DOMAIN/s: SANT, DNA-binding (InterPro:IPR001005), Homeodomain-like (InterPro:IPR009057), Myb, DNA-binding (InterPro:IPR014778), HTH transcriptional regulator, Myb-type, DNA-binding (InterPro:IPR017930), Homeodomain-related (InterPro:IPR012287), Myb transcription factor (InterPro:IPR015495); BEST Arabidopsis thaliana protein match is: myb domain pro…	0	1	TAIR10	6177617	6179289	+	2	3	0
1	6209587	6210569	MACS_peak_271	128.02	AT1G18050	protein_coding_gene	SWAP (Suppressor-of-White-APricot)/surp RNA-binding domain-containing protein	---	SWAP (Suppressor-of-White-APricot)/surp RNA-binding domain-containing protein; FUNCTIONS IN: RNA binding; INVOLVED IN: RNA processing; LOCATED IN: cellular_component unknown; CONTAINS InterPro DOMAIN/s: SWAP/Surp (InterPro:IPR000061); BEST Arabidopsis thaliana protein match is: unknown protein (TAIR:AT3G30370.1); Has 226 Blast hits to 225 proteins in 72 species: Archae - 0; Bacteria - 0; Metazoa …	0	1	TAIR10	6209771	6211588	-	0	1	0
1	6227967	6230506	MACS_peak_272	283.77	AT1G18100	protein_coding_gene	PEBP (phosphatidylethanolamine-binding protein) family protein	Encodes a member of the FT and TFL1 family of phosphatidylethanolamine-binding proteins. It is expressed in seeds and up-regulated in response to ABA. Loss of function mutants show decreased rate of germination in the presence of ABA. ABA dependent regulation is mediated by both ABI3 and ABI5. ABI5 promotes MFT expression, primarily in the radicle-hypocotyl transition zone and ABI3 suppresses it …	E12A11; CONTAINS InterPro DOMAIN/s: Phosphatidylethanolamine-binding, conserved site (InterPro:IPR001858), Phosphatidylethanolamine-binding protein PEBP (InterPro:IPR008914); BEST Arabidopsis thaliana protein match is: PEBP (phosphatidylethanolamine-binding protein) family protein (TAIR:AT5G03840.1); Has 2417 Blast hits to 2417 proteins in 371 species: Archae - 0; Bacteria - 118; Metazoa - 639; F…	0	1	TAIR10	6227217	6230188	-	1	1	1
1	6240348	6243728	MACS_peak_273	384.23	AT1G18140	protein_coding_gene	laccase 1	putative laccase, a member of laccase family of genes (with 17 members in Arabidopsis).	laccase 1 (LAC1); FUNCTIONS IN: laccase activity; INVOLVED IN: oxidation reduction, lignin catabolic process; LOCATED IN: endomembrane system, apoplast; EXPRESSED IN: 12 plant structures; EXPRESSED DURING: 6 growth stages; CONTAINS InterPro DOMAIN/s: Multicopper oxidase, type 3 (InterPro:IPR011707), Laccase (InterPro:IPR017761), Multicopper oxidase, type 2 (InterPro:IPR011706), Cupredoxin (InterP…	0	1	TAIR10	6238844	6241436	-	2	2	1
1	6261824	6262660	MACS_peak_274	63.9	AT1G18190	protein_coding_gene	golgin candidate 2	This gene is predicted to encode a protein that functions as a Golgi apparatus structural component known as a golgin in mammals and yeast. A fluorescently-tagged version of GC2 co-localizes with Golgi markers, and this localization appears to be replicated using the C-terminal (508?668 aa) portion of the protein.	golgin candidate 2 (GC2); FUNCTIONS IN: molecular_function unknown; INVOLVED IN: biological_process unknown; LOCATED IN: Golgi apparatus; EXPRESSED IN: 23 plant structures; EXPRESSED DURING: 13 growth stages; BEST Arabidopsis thaliana protein match is: golgin candidate 1 (TAIR:AT2G19950.1); Has 50245 Blast hits to 32562 proteins in 2069 species: Archae - 503; Bacteria - 6561; Metazoa - 24889; Fun…	-368	1	TAIR10	6257851	6261457	-	0	1	0
1	6263836	6264969	MACS_peak_275	116.08	---	---	---	---	---	---	---	---	---	---	---	0	1	0
1	6265335	6266413	MACS_peak_276	61.08	AT1G18200	protein_coding_gene	RAB GTPase homolog A6B	---	RAB GTPase homolog A6B (RABA6b); FUNCTIONS IN: GTP binding, GTPase activity; INVOLVED IN: intracellular protein transport, signal transduction, nucleocytoplasmic transport, protein transport, small GTPase mediated signal transduction; LOCATED IN: intracellular; CONTAINS InterPro DOMAIN/s: Ran GTPase (InterPro:IPR002041), Ras (InterPro:IPR013753), Ras small GTPase, Ras type (InterPro:IPR003577), R…	0	1	TAIR10	6265416	6266937	-	0	0	0
1	6269746	6273625	MACS_peak_277	544.07	AT1G18220	protein_coding_gene	purine permease 9	Member of a family of proteins related to PUP1, a purine transporter. May be involved in the transport of purine and purine derivatives such as cytokinins, across the plasma membrane.	purine permease 9 (PUP9); Has 0 Blast hits to 0 proteins in 0 species (source: NCBI BLink).	0	1	TAIR10	6269670	6269807	-	0	1	0
1	6296916	6298415	MACS_peak_278	331.16	AT1G18290	protein_coding_gene	---	---	unknown protein; FUNCTIONS IN: molecular_function unknown; INVOLVED IN: N-terminal protein myristoylation; LOCATED IN: chloroplast; EXPRESSED IN: root; Has 94 Blast hits to 94 proteins in 12 species: Archae - 0; Bacteria - 0; Metazoa - 0; Fungi - 0; Plants - 94; Viruses - 0; Other Eukaryotes - 0 (source: NCBI BLink).	0	1	TAIR10	6297364	6298328	+	1	1	0
1	6315439	6316629	MACS_peak_279	154.9	AT1G18350	protein_coding_gene	MAP kinase kinase 7	MAP kinase kinase7. Member of plant mitogen-activated protein kinase kinase group D. Negative regulator of polar auxin transport. Overexpression leads to activation of basal and systemic acquired resistance.	MAP kinase kinase 7 (MKK7); CONTAINS InterPro DOMAIN/s: Protein kinase, ATP binding site (InterPro:IPR017441), Protein kinase, catalytic domain (InterPro:IPR000719), Serine/threonine-protein kinase domain (InterPro:IPR002290), Serine/threonine-protein kinase-like domain (InterPro:IPR017442), Protein kinase-like domain (InterPro:IPR011009), Serine/threonine-protein kinase, active site (InterPro:IP…	0	1	TAIR10	6315651	6316738	+	0	0	0
1	6331340	6332350	MACS_peak_280	101.19	AT1G18400	protein_coding_gene	BR enhanced expression 1	---	BR enhanced expression 1 (BEE1); FUNCTIONS IN: sequence-specific DNA binding transcription factor activity; INVOLVED IN: regulation of transcription; LOCATED IN: nucleus; EXPRESSED IN: 22 plant structures; EXPRESSED DURING: 13 growth stages; CONTAINS InterPro DOMAIN/s: Helix-loop-helix DNA-binding domain (InterPro:IPR001092), Helix-loop-helix DNA-binding (InterPro:IPR011598); BEST Arabidopsis tha…	0	1	TAIR10	6331398	6333743	+	0	1	0
1	6389294	6391555	MACS_peak_281	132.58	AT1G18570	protein_coding_gene	myb domain protein 51	Encodes a member of the R2R3-MYB transcription family. Involved in indole glucosinolate biosynthesis.	myb domain protein 51 (MYB51); CONTAINS InterPro DOMAIN/s: SANT, DNA-binding (InterPro:IPR001005), Homeodomain-like (InterPro:IPR009057), Myb, DNA-binding (InterPro:IPR014778), HTH transcriptional regulator, Myb-type, DNA-binding (InterPro:IPR017930), Homeodomain-related (InterPro:IPR012287), Myb transcription factor (InterPro:IPR015495); BEST Arabidopsis thaliana protein match is: myb domain pro…	0	1	TAIR10	6389411	6391267	+	0	1	1
1	6392092	6393532	MACS_peak_282	94.21	---	---	---	---	---	---	---	---	---	---	---	0	0	0
1	6450245	6451388	MACS_peak_283	157.9	AT1G18710	protein_coding_gene	myb domain protein 47	Member of the R2R3 factor gene family.	myb domain protein 47 (MYB47); FUNCTIONS IN: DNA binding, sequence-specific DNA binding transcription factor activity; INVOLVED IN: response to jasmonic acid stimulus, response to salt stress, regulation of transcription, DNA-dependent; LOCATED IN: nucleus, cytoplasm; EXPRESSED IN: leaf lamina base, stem, leaf whorl, leaf; EXPRESSED DURING: LP.06 six leaves visible, LP.04 four leaves visible, LP.…	0	1	TAIR10	6450594	6453114	+	0	1	0
1	6451933	6453008	MACS_peak_284	169.81	AT1G18710	protein_coding_gene	myb domain protein 47	Member of the R2R3 factor gene family.	myb domain protein 47 (MYB47); FUNCTIONS IN: DNA binding, sequence-specific DNA binding transcription factor activity; INVOLVED IN: response to jasmonic acid stimulus, response to salt stress, regulation of transcription, DNA-dependent; LOCATED IN: nucleus, cytoplasm; EXPRESSED IN: leaf lamina base, stem, leaf whorl, leaf; EXPRESSED DURING: LP.06 six leaves visible, LP.04 four leaves visible, LP.…	0	1	TAIR10	6450594	6453114	+	0	1	0
1	6470323	6472360	MACS_peak_285	490.97	AT1G18760	protein_coding_gene	Zinc finger, C3HC4 type (RING finger) family protein	---	Zinc finger, C3HC4 type (RING finger) family protein; FUNCTIONS IN: zinc ion binding; CONTAINS InterPro DOMAIN/s: Zinc finger, RING-type (InterPro:IPR001841), Zinc finger, C3HC4 RING-type (InterPro:IPR018957), Ubiquitin interacting motif (InterPro:IPR003903); BEST Arabidopsis thaliana protein match is: RING/U-box superfamily protein (TAIR:AT3G13228.1); Has 8667 Blast hits to 8640 proteins in 280 …	0	1	TAIR10	6471150	6471824	-	1	4	0
1	6472629	6474293	MACS_peak_286	59.49	AT1G18770	protein_coding_gene	RING/U-box superfamily protein	---	RING/U-box superfamily protein; FUNCTIONS IN: zinc ion binding; CONTAINS InterPro DOMAIN/s: Zinc finger, RING-type (InterPro:IPR001841), Zinc finger, C3HC4 RING-type (InterPro:IPR018957); BEST Arabidopsis thaliana protein match is: Zinc finger, C3HC4 type (RING finger) family protein (TAIR:AT1G18760.1); Has 8585 Blast hits to 8561 proteins in 274 species: Archae - 0; Bacteria - 0; Metazoa - 2475;…	0	1	TAIR10	6473370	6474048	-	0	2	1
1	6478343	6480070	MACS_peak_287	164.53	AT1G18790	protein_coding_gene	RWP-RK domain-containing protein	---	RWP-RK domain-containing protein; CONTAINS InterPro DOMAIN/s: Plant regulator RWP-RK (InterPro:IPR003035); BEST Arabidopsis thaliana protein match is: RWP-RK domain-containing protein (TAIR:AT1G74480.1); Has 558 Blast hits to 554 proteins in 54 species: Archae - 0; Bacteria - 12; Metazoa - 59; Fungi - 0; Plants - 419; Viruses - 0; Other Eukaryotes - 68 (source: NCBI BLink).	0	1	TAIR10	6478851	6480043	-	1	1	0
1	6485737	6486821	MACS_peak_288	89.37	AT1G18810	protein_coding_gene	phytochrome kinase substrate-related	---	phytochrome kinase substrate-related; BEST Arabidopsis thaliana protein match is: phytochrome kinase substrate 1 (TAIR:AT2G02950.1); Has 458 Blast hits to 394 proteins in 45 species: Archae - 0; Bacteria - 2; Metazoa - 60; Fungi - 9; Plants - 109; Viruses - 2; Other Eukaryotes - 276 (source: NCBI BLink).	0	1	TAIR10	6485596	6487030	-	0	1	0
1	6495378	6496890	MACS_peak_289	104.66	AT1G18835	protein_coding_gene	mini zinc finger	Encodes a small zinc &#64257;nger protein whose overexpression induces ectopic meristem formation on leaf margins.	mini zinc finger (MIF3); CONTAINS InterPro DOMAIN/s: ZF-HD homeobox protein, Cys/His-rich dimerisation domain (InterPro:IPR006456); BEST Arabidopsis thaliana protein match is: mini zinc finger 1 (TAIR:AT1G74660.1); Has 420 Blast hits to 420 proteins in 28 species: Archae - 0; Bacteria - 0; Metazoa - 0; Fungi - 0; Plants - 420; Viruses - 0; Other Eukaryotes - 0 (source: NCBI BLink).	0	1	TAIR10	6496098	6496396	-	0	1	0
1	6497641	6499215	MACS_peak_290	238.08	---	---	---	---	---	---	---	---	---	---	---	1	1	0
1	6508970	6511661	MACS_peak_291	642.63	AT1G18860	protein_coding_gene	WRKY DNA-binding protein 61	member of WRKY Transcription Factor; Group II-b	WRKY DNA-binding protein 61 (WRKY61); CONTAINS InterPro DOMAIN/s: DNA-binding WRKY (InterPro:IPR003657); BEST Arabidopsis thaliana protein match is: WRKY DNA-binding protein 72 (TAIR:AT5G15130.1); Has 5252 Blast hits to 3559 proteins in 289 species: Archae - 0; Bacteria - 31; Metazoa - 146; Fungi - 97; Plants - 3463; Viruses - 1; Other Eukaryotes - 1514 (source: NCBI BLink).	0	1	TAIR10	6509492	6511227	+	0	1	0
1	6553228	6554213	MACS_peak_292	141.32	AT1G18960	protein_coding_gene	myb-like HTH transcriptional regulator family protein	---	myb-like HTH transcriptional regulator family protein; FUNCTIONS IN: DNA binding, sequence-specific DNA binding transcription factor activity; INVOLVED IN: regulation of transcription, DNA-dependent, regulation of transcription; CONTAINS InterPro DOMAIN/s: SANT, DNA-binding (InterPro:IPR001005), Homeodomain-like (InterPro:IPR009057), Myb, DNA-binding (InterPro:IPR014778), HTH transcriptional regu…	0	1	TAIR10	6552752	6553940	+	0	0	0
1	6554572	6555556	MACS_peak_293	160.9	AT1G18970	protein_coding_gene	germin-like protein 4	Encodes a germin-like protein with possible oxalate oxidase activity (based on GenBank record).	germin-like protein 4 (GLP4); FUNCTIONS IN: manganese ion binding, nutrient reservoir activity; LOCATED IN: endomembrane system, apoplast; EXPRESSED IN: root; CONTAINS InterPro DOMAIN/s: Cupin, RmlC-type (InterPro:IPR011051), Cupin 1 (InterPro:IPR006045), RmlC-like jelly roll fold (InterPro:IPR014710), Germin (InterPro:IPR001929), Germin, manganese binding site (InterPro:IPR019780); BEST Arabidop…	0	1	TAIR10	6554568	6555377	-	0	0	0
1	6571894	6573078	MACS_peak_294	104.92	---	---	---	---	---	---	---	---	---	---	---	1	0	0
1	6581724	6583803	MACS_peak_295	562.3	AT1G19060	protein_coding_gene	Protein of unknown function (DUF626)	---	Protein of unknown function (DUF626); CONTAINS InterPro DOMAIN/s: Protein of unknown function DUF626, Arabidopsis thaliana (InterPro:IPR006462); BEST Arabidopsis thaliana protein match is: Protein of unknown function (DUF626) (TAIR:AT1G02770.1); Has 198 Blast hits to 197 proteins in 2 species: Archae - 0; Bacteria - 0; Metazoa - 0; Fungi - 0; Plants - 198; Viruses - 0; Other Eukaryotes - 0 (sourc…	0	1	TAIR10	6582066	6583601	-	0	1	0
1	6614309	6615288	MACS_peak_296	90.12	AT1G19160	protein_coding_gene	F-box family protein	---	F-box family protein; CONTAINS InterPro DOMAIN/s: F-box domain, cyclin-like (InterPro:IPR001810), F-box domain, Skp2-like (InterPro:IPR022364), F-box associated domain, type 3 (InterPro:IPR013187), F-box associated interaction domain (InterPro:IPR017451); BEST Arabidopsis thaliana protein match is: F-box and associated interaction domains-containing protein (TAIR:AT5G52610.1); Has 30201 Blast hit…	0	1	TAIR10	6614162	6615214	-	0	0	0
1	6618745	6620693	MACS_peak_297	276.15	AT1G19170	protein_coding_gene	Pectin lyase-like superfamily protein	---	Pectin lyase-like superfamily protein; FUNCTIONS IN: polygalacturonase activity; INVOLVED IN: carbohydrate metabolic process; LOCATED IN: mitochondrion; EXPRESSED IN: 22 plant structures; EXPRESSED DURING: 13 growth stages; CONTAINS InterPro DOMAIN/s: Pectin lyase fold/virulence factor (InterPro:IPR011050), Parallel beta-helix repeat (InterPro:IPR006626), Pectin lyase fold (InterPro:IPR012334), G…	0	1	TAIR10	6616643	6618986	+	0	1	0
1	6637476	6638725	MACS_peak_298	65.7	---	---	---	---	---	---	---	---	---	---	---	0	0	0
1	6643303	6645568	MACS_peak_299	421.38	AT1G19230	protein_coding_gene	Riboflavin synthase-like superfamily protein	---	Riboflavin synthase-like superfamily protein; FUNCTIONS IN: in 7 functions; INVOLVED IN: defense response; LOCATED IN: integral to membrane, membrane; EXPRESSED IN: 7 plant structures; EXPRESSED DURING: petal differentiation and expansion stage; CONTAINS InterPro DOMAIN/s: Ferredoxin reductase-type FAD-binding domain (InterPro:IPR017927), Cytochrome b245, heavy chain (InterPro:IPR000778), EF-Hand…	0	1	TAIR10	6644189	6649375	+	0	1	0
1	6650598	6654864	MACS_peak_300	531.16	AT1G19250	protein_coding_gene	flavin-dependent monooxygenase 1	FMO1 is required for full expression of TIR-NB-LRR-conditioned resistance to avirulent pathogens and for basal resistance to invasive virulent pathogens. Functions in an EDS1-regulated but SA-independent mechanism that promotes resistance and cell death at pathogen infection sites.	flavin-dependent monooxygenase 1 (FMO1); FUNCTIONS IN: NADP or NADPH binding, oxidoreductase activity, monooxygenase activity, FAD binding, flavin-containing monooxygenase activity; INVOLVED IN: in 7 processes; LOCATED IN: endomembrane system, intrinsic to endoplasmic reticulum membrane; EXPRESSED IN: stem, leaf whorl, sepal, root, stamen; EXPRESSED DURING: 4 anthesis; CONTAINS InterPro DOMAIN/s:…	0	1	TAIR10	6650529	6653078	-	0	2	0
1	6679148	6680098	MACS_peak_301	54.21	AT1G19320	protein_coding_gene	Pathogenesis-related thaumatin superfamily protein	---	Pathogenesis-related thaumatin superfamily protein; FUNCTIONS IN: molecular_function unknown; INVOLVED IN: response to other organism; LOCATED IN: endomembrane system; CONTAINS InterPro DOMAIN/s: Thaumatin, pathogenesis-related (InterPro:IPR001938); BEST Arabidopsis thaliana protein match is: thaumatin-like protein 3 (TAIR:AT1G75030.1); Has 1611 Blast hits to 1588 proteins in 180 species: Archae …	0	1	TAIR10	6679281	6680252	+	0	0	0
1	6719279	6720674	MACS_peak_302	229.19	---	---	---	---	---	---	---	---	---	---	---	0	2	0
1	6721698	6722617	MACS_peak_303	71.29	---	---	---	---	---	---	---	---	---	---	---	1	0	0
1	6738622	6740059	MACS_peak_304	260.74	AT1G19460	protein_coding_gene	Galactose oxidase/kelch repeat superfamily protein	---	Galactose oxidase/kelch repeat superfamily protein; CONTAINS InterPro DOMAIN/s: Galactose oxidase/kelch, beta-propeller (InterPro:IPR011043), Kelch repeat type 1 (InterPro:IPR006652), Kelch related (InterPro:IPR013089), Kelch-type beta propeller (InterPro:IPR015915); BEST Arabidopsis thaliana protein match is: Galactose oxidase/kelch repeat superfamily protein (TAIR:AT1G19470.1); Has 1605 Blast h…	0	1	TAIR10	6738484	6739734	+	0	0	0
1	6754889	6755932	MACS_peak_305	107.97	AT1G19500	protein_coding_gene	---	---	unknown protein; FUNCTIONS IN: molecular_function unknown; INVOLVED IN: biological_process unknown; LOCATED IN: endomembrane system; EXPRESSED IN: 9 plant structures; EXPRESSED DURING: L mature pollen stage, M germinated pollen stage, 4 anthesis, C globular stage, petal differentiation and expansion stage; BEST Arabidopsis thaliana protein match is: unknown protein (TAIR:AT2G35765.1); Has 9 Blast…	0	1	TAIR10	6754786	6755684	-	0	0	0
1	6763822	6765140	MACS_peak_306	72.18	AT1G19530	protein_coding_gene	---	---	unknown protein; FUNCTIONS IN: molecular_function unknown; INVOLVED IN: N-terminal protein myristoylation, anaerobic respiration; LOCATED IN: cellular_component unknown; EXPRESSED IN: leaf apex, inflorescence meristem, hypocotyl, root, flower; EXPRESSED DURING: petal differentiation and expansion stage; Has 47 Blast hits to 47 proteins in 13 species: Archae - 0; Bacteria - 0; Metazoa - 0; Fungi -…	0	1	TAIR10	6763915	6764971	+	0	0	0
1	6769395	6771007	MACS_peak_307	106.68	---	---	---	---	---	---	---	---	---	---	---	2	0	0
1	6771008	6773255	MACS_peak_308	91.82	---	---	---	---	---	---	---	---	---	---	---	0	0	0
1	6781178	6782559	MACS_peak_309	71.83	AT1G19610	protein_coding_gene	Arabidopsis defensin-like protein	Predicted to encode a PR (pathogenesis-related) protein. Belongs to the plant defensin (PDF) family with the following members: At1g75830/PDF1.1, At5g44420/PDF1.2a, At2g26020/PDF1.2b, At5g44430/PDF1.2c, At2g26010/PDF1.3, At1g19610/PDF1.4, At1g55010/PDF1.5, At2g02120/PDF2.1, At2g02100/PDF2.2, At2g02130/PDF2.3, At1g61070/PDF2.4, At5g63660/PDF2.5, At2g02140/PDF2.6, At5g38330/PDF3.1 and At4g30070/PDF…	PDF1.4; FUNCTIONS IN: molecular_function unknown; INVOLVED IN: defense response; LOCATED IN: endomembrane system; EXPRESSED IN: 13 plant structures; EXPRESSED DURING: 9 growth stages; CONTAINS InterPro DOMAIN/s: Gamma thionin (InterPro:IPR008176), Low-molecular-weight cysteine-rich family (InterPro:IPR020191), Knottin (InterPro:IPR003614); BEST Arabidopsis thaliana protein match is: plant defensi…	0	1	TAIR10	6781483	6782039	-	0	1	0
1	6783262	6786426	MACS_peak_310	97.01	AT1G19630	protein_coding_gene	cytochrome P450, family 722, subfamily A, polypeptide 1	member of CYP722A	cytochrome P450, family 722, subfamily A, polypeptide 1 (CYP722A1); FUNCTIONS IN: electron carrier activity, monooxygenase activity, iron ion binding, oxygen binding, heme binding; INVOLVED IN: oxidation reduction; LOCATED IN: endomembrane system; EXPRESSED IN: stem, flower; EXPRESSED DURING: petal differentiation and expansion stage; CONTAINS InterPro DOMAIN/s: Cytochrome P450 (InterPro:IPR00112…	0	1	TAIR10	6785427	6787967	-	0	1	1
1	6789946	6792973	MACS_peak_311	122.33	AT1G19640	protein_coding_gene	jasmonic acid carboxyl methyltransferase	Encodes a S-adenosyl-L-methionine:jasmonic acid carboxyl methyltransferase that catalyzes the formation of methyljasmonate from jasmonic acid. Its expression is induced in response to wounding or methyljasmonate treatment.	jasmonic acid carboxyl methyltransferase (JMT); CONTAINS InterPro DOMAIN/s: SAM dependent carboxyl methyltransferase (InterPro:IPR005299); BEST Arabidopsis thaliana protein match is: S-adenosyl-L-methionine-dependent methyltransferases superfamily protein (TAIR:AT3G11480.1); Has 890 Blast hits to 871 proteins in 121 species: Archae - 0; Bacteria - 61; Metazoa - 9; Fungi - 5; Plants - 740; Viruses…	0	1	TAIR10	6788885	6791846	-	0	3	0
1	6854303	6855417	MACS_peak_312	87.81	---	---	---	---	---	---	---	---	---	---	---	0	0	0
1	6869493	6870159	MACS_peak_313	60.68	---	---	---	---	---	---	---	---	---	---	---	0	0	0
1	6877588	6878888	MACS_peak_314	58.63	---	---	---	---	---	---	---	---	---	---	---	0	0	0
1	6883529	6884588	MACS_peak_315	70.12	---	---	---	---	---	---	---	---	---	---	---	0	0	0
1	6884719	6886219	MACS_peak_316	50.26	AT1G19850	protein_coding_gene	Transcriptional factor B3 family protein / auxin-responsive factor AUX/IAA-related	Encodes a transcription factor (IAA24) mediating embryo axis formation and vascular development. Similar to AUXIN RESPONSIVE FACTOR 1 (ARF1) shown to bind to auxin responsive elements (AREs), and to the maize transcriptional activator VIVIPAROUS 1( VP1). In situ hybridization shows expression in provascular tissue of embryos, the emerging shoot primordia, then is restricted to provascular tissue,…	MONOPTEROS (MP); FUNCTIONS IN: sequence-specific DNA binding transcription factor activity, promoter binding; INVOLVED IN: in 8 processes; LOCATED IN: nucleus, membrane; EXPRESSED IN: 21 plant structures; EXPRESSED DURING: 11 growth stages; CONTAINS InterPro DOMAIN/s: Aux/IAA-ARF-dimerisation (InterPro:IPR011525), Transcriptional factor B3 (InterPro:IPR003340), AUX/IAA protein (InterPro:IPR003311…	-660	1	TAIR10	6886879	6891374	+	0	0	0
1	6904846	6909137	MACS_peak_317	334.49	AT1G19900	protein_coding_gene	glyoxal oxidase-related protein	---	glyoxal oxidase-related protein; FUNCTIONS IN: molecular_function unknown; INVOLVED IN: biological_process unknown; LOCATED IN: endomembrane system; EXPRESSED IN: root; CONTAINS InterPro DOMAIN/s: Galactose oxidase/kelch, beta-propeller (InterPro:IPR011043), Galactose oxidase, beta-propeller (InterPro:IPR015916), Immunoglobulin E-set (InterPro:IPR014756), Glyoxal oxidase, N-terminal (InterPro:IPR…	0	1	TAIR10	6906899	6908741	-	1	3	1
1	6916825	6917882	MACS_peak_318	129.69	AT1G19930	protein_coding_gene	Galactose oxidase/kelch repeat superfamily protein	---	Galactose oxidase/kelch repeat superfamily protein; CONTAINS InterPro DOMAIN/s: F-box domain, cyclin-like (InterPro:IPR001810), Galactose oxidase/kelch, beta-propeller (InterPro:IPR011043), Kelch repeat type 1 (InterPro:IPR006652), Kelch related (InterPro:IPR013089), Kelch-type beta propeller (InterPro:IPR015915); BEST Arabidopsis thaliana protein match is: Galactose oxidase/kelch repeat superfam…	0	1	TAIR10	6917020	6918138	+	0	0	0
1	6921382	6922373	MACS_peak_319	73.08	---	---	---	---	---	---	---	---	---	---	---	0	0	0
1	6957839	6959383	MACS_peak_320	295.84	AT1G20070	protein_coding_gene	---	---	unknown protein; FUNCTIONS IN: molecular_function unknown; INVOLVED IN: biological_process unknown; LOCATED IN: chloroplast; EXPRESSED IN: 20 plant structures; EXPRESSED DURING: 11 growth stages; Has 26 Blast hits to 26 proteins in 9 species: Archae - 0; Bacteria - 0; Metazoa - 0; Fungi - 2; Plants - 24; Viruses - 0; Other Eukaryotes - 0 (source: NCBI BLink).	0	1	TAIR10	6958010	6959123	-	0	2	1
1	6961615	6965205	MACS_peak_321	299.6	AT1G20080	protein_coding_gene	Calcium-dependent lipid-binding (CaLB domain) family protein	Encodes a synaptotagmin localized on the Golgi apparatus and that regulates protein secretion via the unconventional protein transport from the cytosol to the extracellular matrix in plant cells.	SYTB; FUNCTIONS IN: molecular_function unknown; INVOLVED IN: biological_process unknown; LOCATED IN: endomembrane system; EXPRESSED IN: 6 plant structures; EXPRESSED DURING: L mature pollen stage, M germinated pollen stage, 4 anthesis, petal differentiation and expansion stage; CONTAINS InterPro DOMAIN/s: C2 membrane targeting protein (InterPro:IPR018029), C2 calcium/lipid-binding domain, CaLB (I…	0	1	TAIR10	6962132	6965045	+	0	1	0
1	6977606	6980897	MACS_peak_322	181.16	AT1G20130	protein_coding_gene	GDSL-like Lipase/Acylhydrolase superfamily protein	---	GDSL-like Lipase/Acylhydrolase superfamily protein; FUNCTIONS IN: structural constituent of cell wall, lipase activity, hydrolase activity, acting on ester bonds; INVOLVED IN: lipid metabolic process; CONTAINS InterPro DOMAIN/s: Pistil-specific extensin-like protein (InterPro:IPR003882), Lipase, GDSL, active site (InterPro:IPR008265), Lipase, GDSL (InterPro:IPR001087); BEST Arabidopsis thaliana p…	0	1	TAIR10	6977753	6980241	+	1	1	0
1	6983814	6985315	MACS_peak_323	68.69	AT1G20135	protein_coding_gene	GDSL-like Lipase/Acylhydrolase family protein	---	GDSL-like Lipase/Acylhydrolase family protein; FUNCTIONS IN: lipase activity, hydrolase activity, acting on ester bonds; INVOLVED IN: lipid metabolic process; LOCATED IN: endomembrane system; EXPRESSED IN: petal, leaf whorl, flower, carpel, stamen; EXPRESSED DURING: 4 anthesis, petal differentiation and expansion stage; CONTAINS InterPro DOMAIN/s: Lipase, GDSL, active site (InterPro:IPR008265), L…	0	1	TAIR10	6984124	6985498	+	0	0	0
1	7014446	7015243	MACS_peak_324	114.88	AT1G20240	protein_coding_gene	SWI-SNF-related chromatin binding protein	---	SWI-SNF-related chromatin binding protein; FUNCTIONS IN: molecular_function unknown; INVOLVED IN: biological_process unknown; LOCATED IN: mitochondrion; BEST Arabidopsis thaliana protein match is: F-box family protein (TAIR:AT1G20940.1); Has 101 Blast hits to 51 proteins in 5 species: Archae - 0; Bacteria - 0; Metazoa - 0; Fungi - 0; Plants - 101; Viruses - 0; Other Eukaryotes - 0 (source: NCBI B…	0	1	TAIR10	7012113	7015216	-	0	0	0
1	7056048	7059872	MACS_peak_325	306	AT1G20375	miRNA	MIR394A; miRNA	Encodes a microRNA that targets one member of the F-box family. MicroRNAs are regulatory RNAs with a mature length of ~21-nucleotides that are processed from hairpin precursors by Dicer-like enzymes. MicroRNAs can negatively regulate gene expression by attenuating translation or by directing mRNA cleavage.Mature sequence: UUGGCAUUCUGUCCACCUCC. It targets F-box protein AT1g27340. It is involved in…	---	0	1	TAIR10	7058194	7058310	+	3	1	0
1	7101601	7102501	MACS_peak_326	53.67	AT1G20500	protein_coding_gene	AMP-dependent synthetase and ligase family protein	---	AMP-dependent synthetase and ligase family protein; FUNCTIONS IN: 4-coumarate-CoA ligase activity; INVOLVED IN: phenylpropanoid metabolic process, metabolic process; CONTAINS InterPro DOMAIN/s: AMP-binding, conserved site (InterPro:IPR020845), AMP-dependent synthetase/ligase (InterPro:IPR000873); BEST Arabidopsis thaliana protein match is: AMP-dependent synthetase and ligase family protein (TAIR:…	0	1	TAIR10	7100502	7102915	-	0	0	0
1	7109812	7110746	MACS_peak_327	56.15	AT1G20530	protein_coding_gene	Protein of unknown function (DUF630 and DUF632)	---	Protein of unknown function (DUF630 and DUF632); FUNCTIONS IN: molecular_function unknown; INVOLVED IN: N-terminal protein myristoylation; LOCATED IN: cellular_component unknown; EXPRESSED IN: shoot apex, embryo, flower; EXPRESSED DURING: petal differentiation and expansion stage, D bilateral stage; CONTAINS InterPro DOMAIN/s: Protein of unknown function DUF630 (InterPro:IPR006868), Protein of un…	0	1	TAIR10	7108370	7110377	-	0	0	0
1	7161515	7163579	MACS_peak_328	661.69	---	---	---	---	---	---	---	---	---	---	---	0	1	1
1	7172549	7173692	MACS_peak_329	77.32	AT1G20690	protein_coding_gene	SWI-SNF-related chromatin binding protein	---	SWI-SNF-related chromatin binding protein; BEST Arabidopsis thaliana protein match is: SWI-SNF-related chromatin binding protein (TAIR:AT1G20240.1); Has 53 Blast hits to 49 proteins in 3 species: Archae - 0; Bacteria - 0; Metazoa - 0; Fungi - 0; Plants - 53; Viruses - 0; Other Eukaryotes - 0 (source: NCBI BLink).	-746	1	TAIR10	7174438	7176377	+	1	0	0
1	7197245	7198476	MACS_peak_330	100.83	AT1G20735	protein_coding_gene	F-box and associated interaction domains-containing protein	---	F-box and associated interaction domains-containing protein; CONTAINS InterPro DOMAIN/s: F-box domain, cyclin-like (InterPro:IPR001810), F-box domain, Skp2-like (InterPro:IPR022364), F-box associated interaction domain (InterPro:IPR017451); BEST Arabidopsis thaliana protein match is: F-box family protein (TAIR:AT1G20940.1).	0	1	TAIR10	7197491	7198681	+	0	0	0
1	7201040	7201939	MACS_peak_331	75.26	AT1G20740	protein_coding_gene	Protein of unknown function (DUF833)	---	Protein of unknown function (DUF833); CONTAINS InterPro DOMAIN/s: Protein of unknown function DUF833 (InterPro:IPR008551); BEST Arabidopsis thaliana protein match is: Protein of unknown function (DUF833) (TAIR:AT1G20730.1); Has 322 Blast hits to 322 proteins in 133 species: Archae - 0; Bacteria - 194; Metazoa - 18; Fungi - 2; Plants - 74; Viruses - 0; Other Eukaryotes - 34 (source: NCBI BLink).	0	1	TAIR10	7200394	7201538	+	0	0	0
1	7257803	7258875	MACS_peak_332	137.43	AT1G20860	protein_coding_gene	phosphate transporter 1;8	Encodes Pht1;8, a member of the Pht1 family of phosphate transporters which include: Pht1;1/At5g43350, Pht1;2/At5g43370, Pht1;3/At5g43360, Pht1;4/At2g38940, Pht1;5/At2g32830, Pht1;6/At5g43340, Pht1;7/At3g54700, Pht1;8/At1g20860, Pht1;9/At1g76430 (Plant Journal 2002, 31:341).	phosphate transporter 1;8 (PHT1;8); FUNCTIONS IN: phosphate transmembrane transporter activity, carbohydrate transmembrane transporter activity, sugar:hydrogen symporter activity; INVOLVED IN: transport, transmembrane transport; LOCATED IN: integral to membrane, membrane; CONTAINS InterPro DOMAIN/s: Sugar transporter, conserved site (InterPro:IPR005829), Major facilitator superfamily (InterPro:IP…	0	1	TAIR10	7254007	7258677	-	0	0	0
1	7272158	7276252	MACS_peak_333	494.91	AT1G20900	protein_coding_gene	Predicted AT-hook DNA-binding family protein	Encodes an AT hook domain containing protein that acts redundantly with SOB3 to modulate hypocotyl growth inhibition in response to light.	ESCAROLA (ESC); CONTAINS InterPro DOMAIN/s: Protein of unknown function DUF296 (InterPro:IPR005175), Predicted AT-hook DNA-binding (InterPro:IPR014476); BEST Arabidopsis thaliana protein match is: Predicted AT-hook DNA-binding family protein (TAIR:AT1G76500.1); Has 2335 Blast hits to 2120 proteins in 205 species: Archae - 0; Bacteria - 577; Metazoa - 531; Fungi - 95; Plants - 869; Viruses - 15; O…	0	1	TAIR10	7272556	7274072	+	1	1	1
1	7295150	7296362	MACS_peak_334	197.83	AT1G20940	protein_coding_gene	F-box family protein	---	F-box family protein; CONTAINS InterPro DOMAIN/s: F-box domain, cyclin-like (InterPro:IPR001810), F-box domain, Skp2-like (InterPro:IPR022364), F-box associated interaction domain (InterPro:IPR017451); BEST Arabidopsis thaliana protein match is: SWI-SNF-related chromatin binding protein (TAIR:AT1G20240.1); Has 79 Blast hits to 74 proteins in 8 species: Archae - 0; Bacteria - 0; Metazoa - 0; Fungi…	0	1	TAIR10	7295274	7296518	-	0	0	0
1	7330021	7335192	MACS_peak_335	427.17	AT1G20990	protein_coding_gene	Cysteine/Histidine-rich C1 domain family protein	---	Cysteine/Histidine-rich C1 domain family protein; LOCATED IN: chloroplast; CONTAINS InterPro DOMAIN/s: DC1 (InterPro:IPR004146), C1-like (InterPro:IPR011424); BEST Arabidopsis thaliana protein match is: Cysteine/Histidine-rich C1 domain family protein (TAIR:AT2G16050.1); Has 1603 Blast hits to 716 proteins in 35 species: Archae - 0; Bacteria - 2; Metazoa - 20; Fungi - 0; Plants - 1573; Viruses - …	0	1	TAIR10	7330524	7331946	-	1	2	1
1	7366776	7367629	MACS_peak_336	59.7	AT1G21050	protein_coding_gene	Protein of unknown function, DUF617	---	Protein of unknown function, DUF617; CONTAINS InterPro DOMAIN/s: Protein of unknown function DUF617, plant (InterPro:IPR006460); BEST Arabidopsis thaliana protein match is: Protein of unknown function, DUF617 (TAIR:AT1G76610.1); Has 257 Blast hits to 256 proteins in 14 species: Archae - 0; Bacteria - 0; Metazoa - 0; Fungi - 0; Plants - 257; Viruses - 0; Other Eukaryotes - 0 (source: NCBI BLink).	0	1	TAIR10	7366775	7367678	+	0	2	1
1	7395033	7396006	MACS_peak_337	71.96	AT1G21120	protein_coding_gene	O-methyltransferase family protein	---	O-methyltransferase family protein; FUNCTIONS IN: methyltransferase activity, O-methyltransferase activity, protein dimerization activity; LOCATED IN: cytosol; EXPRESSED IN: 9 plant structures; EXPRESSED DURING: LP.04 four leaves visible, LP.10 ten leaves visible, LP.08 eight leaves visible; CONTAINS InterPro DOMAIN/s: Winged helix-turn-helix transcription repressor DNA-binding (InterPro:IPR01199…	0	1	TAIR10	7395228	7396773	-	0	1	0
1	7402042	7405655	MACS_peak_338	566.34	AT1G21140	protein_coding_gene	Vacuolar iron transporter (VIT) family protein	The gene encodes nodulin-like1 whose transcript abundance was repressed under conditions of Fe-deficient growth.	Vacuolar iron transporter (VIT) family protein; CONTAINS InterPro DOMAIN/s: Protein of unknown function DUF125, transmembrane (InterPro:IPR008217); BEST Arabidopsis thaliana protein match is: Vacuolar iron transporter (VIT) family protein (TAIR:AT3G43660.1); Has 1867 Blast hits to 1856 proteins in 645 species: Archae - 60; Bacteria - 1279; Metazoa - 0; Fungi - 103; Plants - 211; Viruses - 0; Othe…	0	1	TAIR10	7404383	7405281	+	0	1	1
1	7448475	7452030	MACS_peak_339	110.92	AT1G21281	protein_coding_gene	---	---	unknown protein; Has 30201 Blast hits to 17322 proteins in 780 species: Archae - 12; Bacteria - 1396; Metazoa - 17338; Fungi - 3422; Plants - 5037; Viruses - 0; Other Eukaryotes - 2996 (source: NCBI BLink).	0	1	TAIR10	7448552	7448683	+	1	2	1
1	7452555	7456558	MACS_peak_340	107.73	AT1G21310	protein_coding_gene	extensin 3	Encodes extensin 3.	extensin 3 (EXT3); FUNCTIONS IN: structural constituent of cell wall; INVOLVED IN: plant-type cell wall organization; LOCATED IN: endomembrane system; EXPRESSED IN: 7 plant structures; EXPRESSED DURING: 4 anthesis, F mature embryo stage, petal differentiation and expansion stage, E expanded cotyledon stage, D bilateral stage; CONTAINS InterPro DOMAIN/s: Extensin-like repeat (InterPro:IPR006706); …	0	1	TAIR10	7453236	7455009	-	0	1	1
1	7461035	7463254	MACS_peak_341	115.92	AT1G21320	protein_coding_gene	nucleotide binding;nucleic acid binding	---	nucleotide binding;nucleic acid binding; FUNCTIONS IN: nucleotide binding, nucleic acid binding; INVOLVED IN: biological_process unknown; LOCATED IN: cellular_component unknown; EXPRESSED IN: flower, cultured cell; EXPRESSED DURING: petal differentiation and expansion stage; CONTAINS InterPro DOMAIN/s: RNA recognition motif, RNP-1 (InterPro:IPR000504), Nucleotide-binding, alpha-beta plait (InterP…	0	1	TAIR10	7462834	7466164	-	1	0	0
1	7471581	7475717	MACS_peak_342	207.5	AT1G21327	protein_coding_gene	---	---	unknown protein; Has 30201 Blast hits to 17322 proteins in 780 species: Archae - 12; Bacteria - 1396; Metazoa - 17338; Fungi - 3422; Plants - 5037; Viruses - 0; Other Eukaryotes - 2996 (source: NCBI BLink).	0	1	TAIR10	7471947	7472210	-	1	0	0
1	7480264	7483546	MACS_peak_343	324.51	AT1G21360	protein_coding_gene	glycolipid transfer protein 2	---	glycolipid transfer protein 2 (GLTP2); FUNCTIONS IN: glycolipid transporter activity, glycolipid binding; INVOLVED IN: glycolipid transport; LOCATED IN: cytoplasm; CONTAINS InterPro DOMAIN/s: Glycolipid transfer protein, GLTP (InterPro:IPR014830); BEST Arabidopsis thaliana protein match is: Glycolipid transfer protein (GLTP) family protein (TAIR:AT3G21260.3); Has 509 Blast hits to 509 proteins in…	0	1	TAIR10	7481252	7483507	+	0	1	0
1	7515400	7518591	MACS_peak_344	486.61	AT1G21470	protein_coding_gene	---	---	BEST Arabidopsis thaliana protein match is: CLPC homologue 1 (TAIR:AT5G50920.1); Has 326 Blast hits to 324 proteins in 95 species: Archae - 0; Bacteria - 130; Metazoa - 0; Fungi - 0; Plants - 67; Viruses - 0; Other Eukaryotes - 129 (source: NCBI BLink).	0	1	TAIR10	7516709	7517179	-	0	1	0
1	7523144	7525597	MACS_peak_345	284.9	AT1G21475	protein_coding_gene	Protein of unknown function (DUF506)	---	Protein of unknown function (DUF506) ; CONTAINS InterPro DOMAIN/s: Protein of unknown function DUF506, plant (InterPro:IPR006502); BEST Arabidopsis thaliana protein match is: Protein of unknown function (DUF506) (TAIR:AT3G07350.1); Has 13 Blast hits to 13 proteins in 4 species: Archae - 0; Bacteria - 0; Metazoa - 0; Fungi - 0; Plants - 13; Viruses - 0; Other Eukaryotes - 0 (source: NCBI BLink).	0	1	TAIR10	7524086	7524631	-	0	1	0
1	7526128	7528394	MACS_peak_346	97.42	---	---	---	---	---	---	---	---	---	---	---	0	1	0
1	7536854	7538049	MACS_peak_347	232.72	---	---	---	---	---	---	---	---	---	---	---	0	1	0
1	7549279	7550848	MACS_peak_348	113.44	AT1G21540	protein_coding_gene	AMP-dependent synthetase and ligase family protein	---	AMP-dependent synthetase and ligase family protein; FUNCTIONS IN: catalytic activity; INVOLVED IN: metabolic process; EXPRESSED IN: 10 plant structures; EXPRESSED DURING: 4 anthesis, C globular stage, F mature embryo stage, petal differentiation and expansion stage, E expanded cotyledon stage; CONTAINS InterPro DOMAIN/s: EF-Hand 1, calcium-binding site (InterPro:IPR018247), AMP-binding, conserved…	0	1	TAIR10	7548614	7550565	-	0	0	1
1	7599385	7600092	MACS_peak_349	96.13	AT1G21650	protein_coding_gene	Preprotein translocase SecA family protein	Encodes a component of the thylakoid-localized Sec system involved in the translocation of cytoplasmic proteins into plastid. Loss-of-function mutations result in arrest at the globular stage and embryo lethality.	Preprotein translocase SecA family protein; FUNCTIONS IN: ATPase activity, P-P-bond-hydrolysis-driven protein transmembrane transporter activity, ATP binding; INVOLVED IN: intracellular protein transport, protein targeting, protein transport by the Sec complex, protein import; LOCATED IN: internal side of plasma membrane, chloroplast, membrane; EXPRESSED IN: 21 plant structures; EXPRESSED DURING:…	0	1	TAIR10	7592664	7604229	-	0	1	0
1	7668782	7674559	MACS_peak_350	284.31	AT1G21860	protein_coding_gene	SKU5 similar 7	---	SKU5 similar 7 (sks7); FUNCTIONS IN: oxidoreductase activity, copper ion binding; INVOLVED IN: oxidation reduction; LOCATED IN: plant-type cell wall; EXPRESSED IN: stem; CONTAINS InterPro DOMAIN/s: Multicopper oxidase, type 3 (InterPro:IPR011707), Cupredoxin (InterPro:IPR008972), Multicopper oxidase, type 2 (InterPro:IPR011706), Multicopper oxidase, type 1 (InterPro:IPR001117); BEST Arabidopsis t…	0	1	TAIR10	7671028	7674215	-	1	0	1
1	7683755	7687477	MACS_peak_351	183.54	AT1G21890	protein_coding_gene	nodulin MtN21 /EamA-like transporter family protein	nodulin MtN21-like transporter family protein	nodulin MtN21 /EamA-like transporter family protein; LOCATED IN: membrane; EXPRESSED IN: inflorescence meristem, flower; EXPRESSED DURING: petal differentiation and expansion stage; CONTAINS InterPro DOMAIN/s: Protein of unknown function DUF6, transmembrane (InterPro:IPR000620); BEST Arabidopsis thaliana protein match is: nodulin MtN21 /EamA-like transporter family protein (TAIR:AT4G08300.1); Has…	0	1	TAIR10	7682584	7685662	-	1	0	0
1	7696271	7697701	MACS_peak_352	233.31	AT1G21910	protein_coding_gene	Integrase-type DNA-binding superfamily protein	encodes a member of the DREB subfamily A-5 of ERF/AP2 transcription factor family. The protein contains one AP2 domain. There are 15 members in this subfamily including RAP2.1, RAP2.9 and RAP2.10.	Integrase-type DNA-binding superfamily protein; FUNCTIONS IN: DNA binding, sequence-specific DNA binding transcription factor activity; INVOLVED IN: regulation of transcription, DNA-dependent; LOCATED IN: nucleus, chloroplast; EXPRESSED IN: 22 plant structures; EXPRESSED DURING: 13 growth stages; CONTAINS InterPro DOMAIN/s: DNA-binding, integrase-type (InterPro:IPR016177), Pathogenesis-related tr…	0	1	TAIR10	7696536	7697699	+	0	1	1
1	7714977	7715870	MACS_peak_353	127.69	AT1G21940	protein_coding_gene	---	---	unknown protein; FUNCTIONS IN: molecular_function unknown; INVOLVED IN: biological_process unknown; LOCATED IN: endomembrane system; BEST Arabidopsis thaliana protein match is: unknown protein (TAIR:AT1G21950.1); Has 19 Blast hits to 12 proteins in 2 species: Archae - 0; Bacteria - 0; Metazoa - 0; Fungi - 0; Plants - 19; Viruses - 0; Other Eukaryotes - 0 (source: NCBI BLink).	0	1	TAIR10	7715170	7716975	-	0	0	0
1	7716389	7717380	MACS_peak_354	108.69	AT1G21940	protein_coding_gene	---	---	unknown protein; FUNCTIONS IN: molecular_function unknown; INVOLVED IN: biological_process unknown; LOCATED IN: endomembrane system; BEST Arabidopsis thaliana protein match is: unknown protein (TAIR:AT1G21950.1); Has 19 Blast hits to 12 proteins in 2 species: Archae - 0; Bacteria - 0; Metazoa - 0; Fungi - 0; Plants - 19; Viruses - 0; Other Eukaryotes - 0 (source: NCBI BLink).	0	1	TAIR10	7715170	7716975	-	0	0	0
1	7725545	7726806	MACS_peak_355	96.5	AT1G21960	protein_coding_gene	RING/U-box superfamily protein	---	RING/U-box superfamily protein; FUNCTIONS IN: zinc ion binding; CONTAINS InterPro DOMAIN/s: Zinc finger, RING-type (InterPro:IPR001841), Zinc finger, C3HC4 RING-type (InterPro:IPR018957); BEST Arabidopsis thaliana protein match is: Zinc finger, C3HC4 type (RING finger) family protein (TAIR:AT1G18760.1); Has 8070 Blast hits to 8054 proteins in 255 species: Archae - 0; Bacteria - 0; Metazoa - 2404;…	0	1	TAIR10	7725972	7726586	+	0	0	0
1	7730889	7732134	MACS_peak_356	80.93	AT1G21975	protein_coding_gene	---	---	unknown protein; Has 30201 Blast hits to 17322 proteins in 780 species: Archae - 12; Bacteria - 1396; Metazoa - 17338; Fungi - 3422; Plants - 5037; Viruses - 0; Other Eukaryotes - 2996 (source: NCBI BLink).	-146	1	TAIR10	7732280	7732468	+	0	0	0
1	7732694	7734275	MACS_peak_357	73.78	---	---	---	---	---	---	---	---	---	---	---	0	0	0
1	7740077	7745241	MACS_peak_358	398.76	AT1G22000	protein_coding_gene	FBD, F-box and Leucine Rich Repeat domains containing protein	---	FBD, F-box and Leucine Rich Repeat domains containing protein; CONTAINS InterPro DOMAIN/s: FBD (InterPro:IPR013596), F-box domain, cyclin-like (InterPro:IPR001810), F-box domain, Skp2-like (InterPro:IPR022364), FBD-like (InterPro:IPR006566), Leucine-rich repeat 2 (InterPro:IPR013101); BEST Arabidopsis thaliana protein match is: FBD, F-box and Leucine Rich Repeat domains containing protein (TAIR:A…	0	1	TAIR10	7744189	7747785	+	2	2	0
1	7748860	7753683	MACS_peak_359	124.46	AT1G22010	protein_coding_gene	---	---	unknown protein; Has 12 Blast hits to 12 proteins in 2 species: Archae - 0; Bacteria - 0; Metazoa - 0; Fungi - 0; Plants - 12; Viruses - 0; Other Eukaryotes - 0 (source: NCBI BLink).	0	1	TAIR10	7749571	7750062	+	1	3	0
1	7762164	7763199	MACS_peak_360	97.04	---	---	---	---	---	---	---	---	---	---	---	0	0	0
1	7792891	7794834	MACS_peak_361	89.56	AT1G22080	protein_coding_gene	Cysteine proteinases superfamily protein	---	Cysteine proteinases superfamily protein; BEST Arabidopsis thaliana protein match is: unknown protein (TAIR:AT3G19515.2); Has 30201 Blast hits to 17322 proteins in 780 species: Archae - 12; Bacteria - 1396; Metazoa - 17338; Fungi - 3422; Plants - 5037; Viruses - 0; Other Eukaryotes - 2996 (source: NCBI BLink).	0	1	TAIR10	7792192	7795440	-	0	0	0
1	7795314	7797393	MACS_peak_362	104.35	AT1G22090	protein_coding_gene	Protein of unknown function (DUF626)	---	embryo defective 2204 (emb2204); CONTAINS InterPro DOMAIN/s: Protein of unknown function DUF626, Arabidopsis thaliana (InterPro:IPR006462); BEST Arabidopsis thaliana protein match is: Protein of unknown function (DUF626) (TAIR:AT1G02770.1); Has 202 Blast hits to 201 proteins in 2 species: Archae - 0; Bacteria - 0; Metazoa - 0; Fungi - 0; Plants - 202; Viruses - 0; Other Eukaryotes - 0 (source: NC…	0	1	TAIR10	7795708	7797425	+	0	0	0
1	7801278	7802854	MACS_peak_363	369.79	AT1G22110	protein_coding_gene	structural constituent of ribosome	---	structural constituent of ribosome; FUNCTIONS IN: structural constituent of ribosome; INVOLVED IN: translation; LOCATED IN: ribosome, intracellular, chloroplast; EXPRESSED IN: 7 plant structures; EXPRESSED DURING: L mature pollen stage, M germinated pollen stage, 4 anthesis, petal differentiation and expansion stage; CONTAINS InterPro DOMAIN/s: Protein of unknown function DUF3049 (InterPro:IPR021…	0	1	TAIR10	7800507	7802562	-	0	1	1
1	7817358	7818840	MACS_peak_364	232.61	AT1G22150	protein_coding_gene	sulfate transporter 1;3	sulfate transporter Sultr1;3	sulfate transporter 1;3 (SULTR1;3); FUNCTIONS IN: sulfate transmembrane transporter activity; INVOLVED IN: sulfate transport, transport, transmembrane transport; LOCATED IN: integral to membrane, membrane; EXPRESSED IN: petal, leaf whorl, sperm cell, flower, pollen tube; EXPRESSED DURING: 4 anthesis, petal differentiation and expansion stage; CONTAINS InterPro DOMAIN/s: Sulphate transporter (Inte…	0	1	TAIR10	7818361	7821344	+	0	0	0
1	7841040	7842861	MACS_peak_365	100.38	AT1G22210	protein_coding_gene	Haloacid dehalogenase-like hydrolase (HAD) superfamily protein	---	Haloacid dehalogenase-like hydrolase (HAD) superfamily protein; FUNCTIONS IN: catalytic activity, trehalose-phosphatase activity; INVOLVED IN: trehalose biosynthetic process, metabolic process; LOCATED IN: cellular_component unknown; EXPRESSED IN: 17 plant structures; EXPRESSED DURING: 7 growth stages; CONTAINS InterPro DOMAIN/s: HAD-superfamily hydrolase, subfamily IIB (InterPro:IPR006379), Treh…	0	1	TAIR10	7841518	7844056	+	1	0	0
1	7846421	7847519	MACS_peak_366	184.09	AT1G22220	protein_coding_gene	F-box family protein	---	F-box family protein; CONTAINS InterPro DOMAIN/s: F-box domain, cyclin-like (InterPro:IPR001810); BEST Arabidopsis thaliana protein match is: F-box family protein (TAIR:AT1G78100.1); Has 155 Blast hits to 154 proteins in 12 species: Archae - 0; Bacteria - 0; Metazoa - 0; Fungi - 0; Plants - 155; Viruses - 0; Other Eukaryotes - 0 (source: NCBI BLink).	0	1	TAIR10	7846602	7847802	+	0	1	0
1	7853986	7854758	MACS_peak_367	60.07	AT1G22240	protein_coding_gene	pumilio 8	Encodes a member of the Arabidopsis Pumilio (APUM) proteins containing PUF domain (eight repeats of approximately 36 amino acids each). PUF proteins regulate both mRNA stability and translation through sequence-specific binding to the 3' UTR of target mRNA transcripts.	pumilio 8 (PUM8); FUNCTIONS IN: RNA binding, binding; LOCATED IN: cytoplasm; EXPRESSED IN: 14 plant structures; EXPRESSED DURING: 8 growth stages; CONTAINS InterPro DOMAIN/s: Pumilio RNA-binding repeat (InterPro:IPR001313), Armadillo-like helical (InterPro:IPR011989), Armadillo-type fold (InterPro:IPR016024); BEST Arabidopsis thaliana protein match is: pumilio 7 (TAIR:AT1G78160.1); Has 2896 Blast…	0	1	TAIR10	7853084	7854963	+	0	0	0
1	7856468	7857395	MACS_peak_368	125.33	---	---	---	---	---	---	---	---	---	---	---	0	0	0
1	7890666	7892365	MACS_peak_369	123	AT1G22340	protein_coding_gene	UDP-glucosyl transferase 85A7	---	UDP-glucosyl transferase 85A7 (UGT85A7); FUNCTIONS IN: UDP-glycosyltransferase activity, transferase activity, transferring glycosyl groups, glucuronosyltransferase activity; INVOLVED IN: metabolic process; LOCATED IN: cellular_component unknown; EXPRESSED IN: 8 plant structures; CONTAINS InterPro DOMAIN/s: UDP-glucuronosyl/UDP-glucosyltransferase (InterPro:IPR002213); BEST Arabidopsis thaliana p…	0	1	TAIR10	7890464	7892090	-	0	1	0
1	7892463	7893782	MACS_peak_370	88.26	AT1G22340	protein_coding_gene	UDP-glucosyl transferase 85A7	---	UDP-glucosyl transferase 85A7 (UGT85A7); FUNCTIONS IN: UDP-glycosyltransferase activity, transferase activity, transferring glycosyl groups, glucuronosyltransferase activity; INVOLVED IN: metabolic process; LOCATED IN: cellular_component unknown; EXPRESSED IN: 8 plant structures; CONTAINS InterPro DOMAIN/s: UDP-glucuronosyl/UDP-glucosyltransferase (InterPro:IPR002213); BEST Arabidopsis thaliana p…	-374	1	TAIR10	7890464	7892090	-	0	1	0
1	7900533	7902461	MACS_peak_371	110.59	AT1G22380	protein_coding_gene	UDP-glucosyl transferase 85A3	Encodes a putative UDP-glucosyl transferase. At1g22380 was initially identified as encoding the protein AAF87154, which has been classified as a bHLH protein (AtbHLH152). Subsequently it has been found that the AAF87154 protein appears to be encoded by the AT1G23970 genomic locus.	UDP-glucosyl transferase 85A3 (UGT85A3); FUNCTIONS IN: transferase activity, transferring glycosyl groups, glucuronosyltransferase activity; INVOLVED IN: metabolic process; LOCATED IN: cellular_component unknown; EXPRESSED IN: 19 plant structures; EXPRESSED DURING: 9 growth stages; CONTAINS InterPro DOMAIN/s: UDP-glucuronosyl/UDP-glucosyltransferase (InterPro:IPR002213); BEST Arabidopsis thaliana…	0	1	TAIR10	7900387	7902332	-	0	1	0
1	7916271	7917577	MACS_peak_372	163.67	AT1G22420	protein_coding_gene	hydroxyproline-rich glycoprotein family protein	---	hydroxyproline-rich glycoprotein family protein; Has 5656 Blast hits to 3947 proteins in 438 species: Archae - 16; Bacteria - 438; Metazoa - 2628; Fungi - 766; Plants - 800; Viruses - 196; Other Eukaryotes - 812 (source: NCBI BLink).	0	1	TAIR10	7916076	7917518	-	1	0	0
1	7922728	7923933	MACS_peak_373	214.61	AT1G22440	protein_coding_gene	Zinc-binding alcohol dehydrogenase family protein	---	Zinc-binding alcohol dehydrogenase family protein; FUNCTIONS IN: oxidoreductase activity, zinc ion binding; INVOLVED IN: oxidation reduction; LOCATED IN: cellular_component unknown; EXPRESSED IN: hypocotyl, root; CONTAINS InterPro DOMAIN/s: GroES-like (InterPro:IPR011032), Alcohol dehydrogenase GroES-like (InterPro:IPR013154), Alcohol dehydrogenase, zinc-containing, conserved site (InterPro:IPR00…	0	1	TAIR10	7922428	7924944	+	0	0	0
1	7934279	7935035	MACS_peak_374	58.66	AT1G22480	protein_coding_gene	Cupredoxin superfamily protein	---	Cupredoxin superfamily protein; FUNCTIONS IN: electron carrier activity, copper ion binding; LOCATED IN: anchored to membrane; EXPRESSED IN: shoot apex, inflorescence meristem, embryo, flower, seed; EXPRESSED DURING: F mature embryo stage, petal differentiation and expansion stage, E expanded cotyledon stage, D bilateral stage; CONTAINS InterPro DOMAIN/s: Plastocyanin-like (InterPro:IPR003245), C…	0	1	TAIR10	7934162	7935382	-	0	1	0
1	7938840	7940852	MACS_peak_375	219.01	AT1G22490	protein_coding_gene	basic helix-loop-helix (bHLH) DNA-binding superfamily protein	---	basic helix-loop-helix (bHLH) DNA-binding superfamily protein; FUNCTIONS IN: DNA binding, sequence-specific DNA binding transcription factor activity; INVOLVED IN: regulation of transcription; LOCATED IN: nucleus; EXPRESSED IN: 17 plant structures; EXPRESSED DURING: 8 growth stages; CONTAINS InterPro DOMAIN/s: Helix-loop-helix DNA-binding domain (InterPro:IPR001092), Helix-loop-helix DNA-binding …	0	1	TAIR10	7938251	7940592	-	0	2	1
1	7977901	7978685	MACS_peak_376	51.3	AT1G22570	protein_coding_gene	Major facilitator superfamily protein	---	Major facilitator superfamily protein; FUNCTIONS IN: transporter activity; INVOLVED IN: oligopeptide transport; LOCATED IN: membrane; EXPRESSED IN: 17 plant structures; EXPRESSED DURING: 10 growth stages; CONTAINS InterPro DOMAIN/s: PTR2 family proton/oligopeptide symporter, conserved site (InterPro:IPR018456), Oligopeptide transporter (InterPro:IPR000109), Major facilitator superfamily, general …	0	1	TAIR10	7976620	7978573	-	0	0	0
1	7988261	7989319	MACS_peak_377	122.34	AT1G22600	protein_coding_gene	Late embryogenesis abundant protein (LEA) family protein	---	Late embryogenesis abundant protein (LEA) family protein; FUNCTIONS IN: molecular_function unknown; INVOLVED IN: biological_process unknown; LOCATED IN: endomembrane system; EXPRESSED IN: stem, embryo, sperm cell, hypocotyl, flower; EXPRESSED DURING: petal differentiation and expansion stage, D bilateral stage; BEST Arabidopsis thaliana protein match is: late embryogenesis abundant domain-contain…	0	1	TAIR10	7987141	7989217	-	0	1	0
1	8024912	8026333	MACS_peak_378	358.38	AT1G22680	protein_coding_gene	---	---	unknown protein; FUNCTIONS IN: molecular_function unknown; INVOLVED IN: biological_process unknown; LOCATED IN: chloroplast; CONTAINS InterPro DOMAIN/s: Protein of unknown function DUF688 (InterPro:IPR007789); BEST Arabidopsis thaliana protein match is: unknown protein (TAIR:AT1G71970.1); Has 44 Blast hits to 44 proteins in 8 species: Archae - 0; Bacteria - 0; Metazoa - 0; Fungi - 0; Plants - 44;…	0	1	TAIR10	8024967	8026356	-	0	0	0
1	8032076	8033095	MACS_peak_379	87.75	AT1G22710	protein_coding_gene	sucrose-proton symporter 2	Encodes for a high-affinity transporter essential for phloem loading and long-distance transport. A major sucrose transporter, AtSUC2 can also transport a wide range of physiological and synthetic glucose conjugates with both &#945;- or &#946;-linkage.	sucrose-proton symporter 2 (SUC2); CONTAINS InterPro DOMAIN/s: Sucrose/H+ symporter, plant (InterPro:IPR005989), Major facilitator superfamily MFS-1 (InterPro:IPR011701), Major facilitator superfamily, general substrate transporter (InterPro:IPR016196); BEST Arabidopsis thaliana protein match is: sucrose-proton symporter 1 (TAIR:AT1G71880.1); Has 2329 Blast hits to 2203 proteins in 568 species: A…	0	1	TAIR10	8030641	8033117	-	0	1	0
1	8055409	8056219	MACS_peak_380	81.51	AT1G22760	protein_coding_gene	poly(A) binding protein 3	Putative poly(A) binding protein May there fore function in posttranscriptional regulation, including mRNA turnover and translational initiation. Expression detected only in floral organs.	poly(A) binding protein 3 (PAB3); CONTAINS InterPro DOMAIN/s: Polyadenylate-binding protein/Hyperplastic disc protein (InterPro:IPR002004), RNA recognition motif, RNP-1 (InterPro:IPR000504), Polyadenylate binding protein, human types 1, 2, 3, 4 (InterPro:IPR006515), Nucleotide-binding, alpha-beta plait (InterPro:IPR012677); BEST Arabidopsis thaliana protein match is: poly(A)-binding protein 5 (TA…	0	1	TAIR10	8055325	8059015	+	0	1	0
1	8056244	8057101	MACS_peak_381	52.29	AT1G22760	protein_coding_gene	poly(A) binding protein 3	Putative poly(A) binding protein May there fore function in posttranscriptional regulation, including mRNA turnover and translational initiation. Expression detected only in floral organs.	poly(A) binding protein 3 (PAB3); CONTAINS InterPro DOMAIN/s: Polyadenylate-binding protein/Hyperplastic disc protein (InterPro:IPR002004), RNA recognition motif, RNP-1 (InterPro:IPR000504), Polyadenylate binding protein, human types 1, 2, 3, 4 (InterPro:IPR006515), Nucleotide-binding, alpha-beta plait (InterPro:IPR012677); BEST Arabidopsis thaliana protein match is: poly(A)-binding protein 5 (TA…	0	1	TAIR10	8055325	8059015	+	0	0	0
1	8103487	8104788	MACS_peak_382	84.48	AT1G22900	protein_coding_gene	Disease resistance-responsive (dirigent-like protein) family protein	---	Disease resistance-responsive (dirigent-like protein) family protein; FUNCTIONS IN: molecular_function unknown; INVOLVED IN: defense response; LOCATED IN: endomembrane system; EXPRESSED IN: stamen; EXPRESSED DURING: 4 anthesis; CONTAINS InterPro DOMAIN/s: Plant disease resistance response protein (InterPro:IPR004265); BEST Arabidopsis thaliana protein match is: Disease resistance-responsive (diri…	0	1	TAIR10	8103659	8104505	-	0	1	0
1	8105415	8108899	MACS_peak_383	205.12	AT1G22910	protein_coding_gene	RNA-binding (RRM/RBD/RNP motifs) family protein	---	RNA-binding (RRM/RBD/RNP motifs) family protein; FUNCTIONS IN: RNA binding, nucleotide binding, nucleic acid binding; INVOLVED IN: biological_process unknown; LOCATED IN: cellular_component unknown; EXPRESSED IN: 22 plant structures; EXPRESSED DURING: 13 growth stages; CONTAINS InterPro DOMAIN/s: RNA recognition motif, RNP-1 (InterPro:IPR000504), Nucleotide-binding, alpha-beta plait (InterPro:IPR…	0	1	TAIR10	8105589	8108164	+	0	1	0
1	8138656	8140477	MACS_peak_384	531.58	AT1G22990	protein_coding_gene	Heavy metal transport/detoxification superfamily protein	---	Heavy metal transport/detoxification superfamily protein ; FUNCTIONS IN: metal ion binding; INVOLVED IN: metal ion transport; LOCATED IN: cellular_component unknown; EXPRESSED IN: 9 plant structures; EXPRESSED DURING: LP.04 four leaves visible, 4 anthesis, C globular stage; CONTAINS InterPro DOMAIN/s: Heavy metal transport/detoxification protein (InterPro:IPR006121); BEST Arabidopsis thaliana pro…	0	1	TAIR10	8139165	8140202	+	1	1	1
1	8146965	8147733	MACS_peak_385	56.98	AT1G23010	protein_coding_gene	Cupredoxin superfamily protein	Encodes a protein with multicopper oxidase activity. Located in ER. Function together with LPR2 (AT1G71040) and a P5-type ATPase (At5g23630/PDR2) in a common pathway that adjusts root meristem activity to Pi (inorganic phosphate) availability.	Low Phosphate Root1 (LPR1); CONTAINS InterPro DOMAIN/s: Multicopper oxidase, type 3 (InterPro:IPR011707), Multicopper oxidase, type 2 (InterPro:IPR011706), Cupredoxin (InterPro:IPR008972), Multicopper oxidase, type 1 (InterPro:IPR001117); BEST Arabidopsis thaliana protein match is: Cupredoxin superfamily protein (TAIR:AT1G71040.1); Has 3143 Blast hits to 2693 proteins in 814 species: Archae - 12;…	0	1	TAIR10	8147264	8149813	+	0	1	0
1	8161824	8163957	MACS_peak_386	224.16	AT1G23037	protein_coding_gene	F-box associated ubiquitination effector family protein	---	F-box associated ubiquitination effector family protein; FUNCTIONS IN: molecular_function unknown; INVOLVED IN: biological_process unknown; LOCATED IN: cellular_component unknown; CONTAINS InterPro DOMAIN/s: F-box associated domain, type 3 (InterPro:IPR013187); BEST Arabidopsis thaliana protein match is: F-box and associated interaction domains-containing protein (TAIR:AT3G52320.1); Has 71 Blast …	0	1	TAIR10	8162414	8163149	+	0	0	0
1	8173810	8175898	MACS_peak_387	310.57	AT1G23070	protein_coding_gene	Protein of unknown function (DUF300)	---	Protein of unknown function (DUF300); CONTAINS InterPro DOMAIN/s: Protein of unknown function DUF300 (InterPro:IPR005178); BEST Arabidopsis thaliana protein match is: Protein of unknown function (DUF300) (TAIR:AT4G38360.2); Has 840 Blast hits to 837 proteins in 189 species: Archae - 0; Bacteria - 0; Metazoa - 286; Fungi - 190; Plants - 245; Viruses - 0; Other Eukaryotes - 119 (source: NCBI BLink).	0	1	TAIR10	8173823	8175819	-	0	0	0
1	8198697	8202182	MACS_peak_388	419.23	AT1G23130	protein_coding_gene	Polyketide cyclase/dehydrase and lipid transport superfamily protein	---	Polyketide cyclase/dehydrase and lipid transport superfamily protein; FUNCTIONS IN: molecular_function unknown; INVOLVED IN: response to biotic stimulus, defense response; LOCATED IN: cellular_component unknown; EXPRESSED IN: 15 plant structures; EXPRESSED DURING: 10 growth stages; CONTAINS InterPro DOMAIN/s: Bet v I allergen (InterPro:IPR000916); BEST Arabidopsis thaliana protein match is: MLP-l…	0	1	TAIR10	8200383	8201235	+	2	2	0
1	8208832	8211466	MACS_peak_389	228.86	AT1G23160	protein_coding_gene	Auxin-responsive GH3 family protein	---	Auxin-responsive GH3 family protein; CONTAINS InterPro DOMAIN/s: GH3 auxin-responsive promoter (InterPro:IPR004993); BEST Arabidopsis thaliana protein match is: Auxin-responsive GH3 family protein (TAIR:AT5G13320.1); Has 1394 Blast hits to 1308 proteins in 220 species: Archae - 0; Bacteria - 431; Metazoa - 54; Fungi - 2; Plants - 672; Viruses - 0; Other Eukaryotes - 235 (source: NCBI BLink).	0	1	TAIR10	8209232	8211325	+	0	0	0
1	8226872	8229814	MACS_peak_390	262.85	AT1G23200	protein_coding_gene	Plant invertase/pectin methylesterase inhibitor superfamily	---	Plant invertase/pectin methylesterase inhibitor superfamily; FUNCTIONS IN: enzyme inhibitor activity, pectinesterase activity; INVOLVED IN: cell wall modification; LOCATED IN: endomembrane system, cell wall, plant-type cell wall; EXPRESSED IN: 8 plant structures; EXPRESSED DURING: 4 anthesis, petal differentiation and expansion stage; CONTAINS InterPro DOMAIN/s: Pectinesterase, active site (Inter…	0	1	TAIR10	8227178	8229582	+	0	0	1
1	8233978	8234925	MACS_peak_391	67.3	AT1G23205	protein_coding_gene	Plant invertase/pectin methylesterase inhibitor superfamily protein	---	Plant invertase/pectin methylesterase inhibitor superfamily protein; FUNCTIONS IN: enzyme inhibitor activity, pectinesterase inhibitor activity, pectinesterase activity; INVOLVED IN: biological_process unknown; LOCATED IN: endomembrane system; EXPRESSED IN: 18 plant structures; EXPRESSED DURING: 13 growth stages; CONTAINS InterPro DOMAIN/s: Pectinesterase inhibitor (InterPro:IPR006501); BEST Arab…	0	1	TAIR10	8233997	8234893	-	0	1	0
1	8252655	8254975	MACS_peak_392	229.41	AT1G23240	protein_coding_gene	Caleosin-related family protein	---	Caleosin-related family protein; CONTAINS InterPro DOMAIN/s: Caleosin related (InterPro:IPR007736); BEST Arabidopsis thaliana protein match is: Caleosin-related family protein (TAIR:AT1G70670.1); Has 342 Blast hits to 337 proteins in 61 species: Archae - 0; Bacteria - 0; Metazoa - 0; Fungi - 60; Plants - 279; Viruses - 0; Other Eukaryotes - 3 (source: NCBI BLink).	0	1	TAIR10	8252715	8254625	-	2	0	0
1	8264893	8266511	MACS_peak_393	341.4	AT1G23300	protein_coding_gene	MATE efflux family protein	---	MATE efflux family protein; FUNCTIONS IN: antiporter activity, drug transmembrane transporter activity, transporter activity; INVOLVED IN: drug transmembrane transport, transmembrane transport; LOCATED IN: membrane; CONTAINS InterPro DOMAIN/s: Multi antimicrobial extrusion protein MatE (InterPro:IPR002528); BEST Arabidopsis thaliana protein match is: MATE efflux family protein (TAIR:AT3G26590.1);…	0	1	TAIR10	8263827	8266048	-	0	0	0
1	8272454	8275804	MACS_peak_394	532.42	AT1G23320	protein_coding_gene	tryptophan aminotransferase related 1	Encodes a protein with similarity to the TAA1 trytophan aminotransferase involved in IAA biosynthesis. This gene appears to be expressed at a very low level during seedling development. Triple mutant analyses implicate this gene in embryonic development.	tryptophan aminotransferase related 1 (TAR1); CONTAINS InterPro DOMAIN/s: Pyridoxal phosphate-dependent transferase, major domain (InterPro:IPR015424), Pyridoxal phosphate-dependent transferase, major region, subdomain 1 (InterPro:IPR015421), Allinase, C-terminal (InterPro:IPR006948); BEST Arabidopsis thaliana protein match is: tryptophan aminotransferase of Arabidopsis 1 (TAIR:AT1G70560.1); Has …	0	1	TAIR10	8273423	8275350	-	1	2	0
1	8284959	8287576	MACS_peak_395	202.83	AT1G23340	protein_coding_gene	Protein of Unknown Function (DUF239)	---	Protein of Unknown Function (DUF239); FUNCTIONS IN: molecular_function unknown; INVOLVED IN: biological_process unknown; LOCATED IN: endomembrane system; EXPRESSED IN: 12 plant structures; EXPRESSED DURING: 6 growth stages; CONTAINS InterPro DOMAIN/s: Protein of unknown function DUF239, plant (InterPro:IPR004314); BEST Arabidopsis thaliana protein match is: Protein of Unknown Function (DUF239) (T…	0	1	TAIR10	8283644	8286832	-	0	1	0
1	8292320	8294527	MACS_peak_396	345.48	AT1G23350	protein_coding_gene	Plant invertase/pectin methylesterase inhibitor superfamily protein	---	Plant invertase/pectin methylesterase inhibitor superfamily protein; FUNCTIONS IN: enzyme inhibitor activity, pectinesterase inhibitor activity, pectinesterase activity; INVOLVED IN: biological_process unknown; LOCATED IN: endomembrane system; EXPRESSED IN: 9 plant structures; EXPRESSED DURING: L mature pollen stage, M germinated pollen stage, 4 anthesis, C globular stage, petal differentiation a…	0	1	TAIR10	8293595	8294264	-	0	0	0
1	8298704	8306681	MACS_peak_397	53.77	AT1G23380	protein_coding_gene	KNOTTED1-like homeobox gene 6	homeodomain transcription factor KNAT6, belonging to class I of KN transcription factor family (which also includes KNAT1 and KNAT2). Expression is increased in as and bop1 leaf mutants.	KNOTTED1-like homeobox gene 6 (KNAT6); FUNCTIONS IN: DNA binding, transcription activator activity, sequence-specific DNA binding transcription factor activity; INVOLVED IN: meristem maintenance; LOCATED IN: nucleus; EXPRESSED IN: 10 plant structures; EXPRESSED DURING: 4 anthesis, F mature embryo stage, petal differentiation and expansion stage, E expanded cotyledon stage, D bilateral stage; CONT…	0	1	TAIR10	8297291	8302651	-	0	3	1
1	8316930	8321267	MACS_peak_398	349.75	AT1G23420	protein_coding_gene	Plant-specific transcription factor YABBY family protein	Essential for formation and asymmetric growth of the ovule outer integument. Member of the YABBY protein family of putative transcription factors that contain apparent Cys(2)-Cys(2) zinc-finger domains and regions of similarity to the high mobility group (HMG) transcription factors. INO may be required for polarity determination in the central part of the ovule.	INNER NO OUTER (INO); CONTAINS InterPro DOMAIN/s: High mobility group, superfamily (InterPro:IPR009071), YABBY protein (InterPro:IPR006780); BEST Arabidopsis thaliana protein match is: plant-specific transcription factor YABBY family protein (TAIR:AT2G26580.2); Has 465 Blast hits to 458 proteins in 128 species: Archae - 0; Bacteria - 0; Metazoa - 0; Fungi - 4; Plants - 444; Viruses - 0; Other Euk…	0	1	TAIR10	8317396	8319483	+	1	1	0
1	8343406	8345029	MACS_peak_399	123.56	AT1G23520	protein_coding_gene	Domain of unknown function (DUF220)	---	Domain of unknown function (DUF220); CONTAINS InterPro DOMAIN/s: Protein of unknown function DUF220 (InterPro:IPR003863); BEST Arabidopsis thaliana protein match is: Domain of unknown function DUF220 (TAIR:AT1G23600.1); Has 145 Blast hits to 132 proteins in 11 species: Archae - 0; Bacteria - 0; Metazoa - 0; Fungi - 0; Plants - 145; Viruses - 0; Other Eukaryotes - 0 (source: NCBI BLink).	0	1	TAIR10	8343424	8344839	-	0	0	0
1	8348979	8350057	MACS_peak_400	59.35	AT1G23540	protein_coding_gene	Protein kinase superfamily protein	Encodes a member of the PERK family of putative receptor kinases. Overexpression leads to morphological defects and reduced fertility and increased expression of MAX genes.	INFLORESCENCE GROWTH INHIBITOR 1 (IGI1); FUNCTIONS IN: protein serine/threonine kinase activity, protein kinase activity, kinase activity, ATP binding; INVOLVED IN: developmental process; LOCATED IN: chloroplast; EXPRESSED IN: male gametophyte, flower, anther, root, pollen tube; EXPRESSED DURING: L mature pollen stage, M germinated pollen stage, 4 anthesis; CONTAINS InterPro DOMAIN/s: Protein kin…	0	1	TAIR10	8346827	8349786	-	0	1	0
1	8368657	8374384	MACS_peak_401	67.31	AT1G23660	protein_coding_gene	Domain of unknown function DUF220	---	Domain of unknown function DUF220; CONTAINS InterPro DOMAIN/s: Protein of unknown function DUF220 (InterPro:IPR003863); BEST Arabidopsis thaliana protein match is: unknown protein (TAIR:AT1G23640.1); Has 149 Blast hits to 134 proteins in 12 species: Archae - 0; Bacteria - 0; Metazoa - 0; Fungi - 0; Plants - 149; Viruses - 0; Other Eukaryotes - 0 (source: NCBI BLink).	0	1	TAIR10	8371609	8372845	-	1	0	0
1	8395031	8397397	MACS_peak_402	243.39	AT1G23730	protein_coding_gene	beta carbonic anhydrase 3	---	beta carbonic anhydrase 3 (BCA3); FUNCTIONS IN: carbonate dehydratase activity, zinc ion binding; INVOLVED IN: carbon utilization; LOCATED IN: cytosol, plasma membrane, membrane; EXPRESSED IN: 14 plant structures; EXPRESSED DURING: 6 growth stages; CONTAINS InterPro DOMAIN/s: Carbonic anhydrase, prokaryotic-like, conserved site (InterPro:IPR015892), Carbonic anhydrase (InterPro:IPR001765); BEST A…	0	1	TAIR10	8395557	8398144	+	0	2	0
1	8402529	8406379	MACS_peak_403	508.85	AT1G23770	protein_coding_gene	F-box family protein	---	F-box family protein; CONTAINS InterPro DOMAIN/s: F-box domain, cyclin-like (InterPro:IPR001810), F-box domain, Skp2-like (InterPro:IPR022364); BEST Arabidopsis thaliana protein match is: F-box family protein (TAIR:AT1G23780.1); Has 268 Blast hits to 268 proteins in 53 species: Archae - 0; Bacteria - 0; Metazoa - 119; Fungi - 0; Plants - 143; Viruses - 0; Other Eukaryotes - 6 (source: NCBI BLink).	0	1	TAIR10	8405214	8406266	-	0	1	1
1	8417060	8418249	MACS_peak_404	128.64	AT1G23810	protein_coding_gene	Paired amphipathic helix (PAH2) superfamily protein	---	Paired amphipathic helix (PAH2) superfamily protein; FUNCTIONS IN: molecular_function unknown; INVOLVED IN: regulation of transcription, DNA-dependent; LOCATED IN: nucleus; CONTAINS InterPro DOMAIN/s: Paired amphipathic helix (InterPro:IPR003822); BEST Arabidopsis thaliana protein match is: Paired amphipathic helix (PAH2) superfamily protein (TAIR:AT1G24250.1); Has 824 Blast hits to 569 proteins …	0	1	TAIR10	8417495	8418566	+	0	0	0
1	8480486	8481638	MACS_peak_405	76.13	AT1G23965	protein_coding_gene	---	---	unknown protein; FUNCTIONS IN: molecular_function unknown; INVOLVED IN: biological_process unknown; LOCATED IN: cellular_component unknown; BEST Arabidopsis thaliana protein match is: unknown protein (TAIR:AT1G70270.1); Has 30 Blast hits to 30 proteins in 8 species: Archae - 0; Bacteria - 0; Metazoa - 0; Fungi - 0; Plants - 30; Viruses - 0; Other Eukaryotes - 0 (source: NCBI BLink).	0	1	TAIR10	8480422	8481486	-	0	0	0
1	8498366	8499835	MACS_peak_406	78.08	AT1G24010	protein_coding_gene	Polyketide cyclase/dehydrase and lipid transport superfamily protein	---	Polyketide cyclase/dehydrase and lipid transport superfamily protein; FUNCTIONS IN: molecular_function unknown; INVOLVED IN: response to biotic stimulus, defense response; LOCATED IN: cellular_component unknown; EXPRESSED IN: embryo, root, pedicel, guard cell, carpel; EXPRESSED DURING: 4 anthesis, C globular stage, petal differentiation and expansion stage; CONTAINS InterPro DOMAIN/s: Bet v I all…	0	1	TAIR10	8498803	8499499	-	0	0	0
1	8515276	8517145	MACS_peak_407	106.29	AT1G24070	protein_coding_gene	cellulose synthase-like A10	encodes a gene similar to cellulose synthase	cellulose synthase-like A10 (CSLA10); FUNCTIONS IN: cellulose synthase activity, transferase activity, transferring glycosyl groups; LOCATED IN: endomembrane system; EXPRESSED IN: 22 plant structures; EXPRESSED DURING: 13 growth stages; CONTAINS InterPro DOMAIN/s: Glycosyl transferase, family 2 (InterPro:IPR001173); BEST Arabidopsis thaliana protein match is: Nucleotide-diphospho-sugar transferas…	0	1	TAIR10	8516238	8519734	-	0	1	0
1	8517750	8520010	MACS_peak_408	213.57	AT1G24070	protein_coding_gene	cellulose synthase-like A10	encodes a gene similar to cellulose synthase	cellulose synthase-like A10 (CSLA10); FUNCTIONS IN: cellulose synthase activity, transferase activity, transferring glycosyl groups; LOCATED IN: endomembrane system; EXPRESSED IN: 22 plant structures; EXPRESSED DURING: 13 growth stages; CONTAINS InterPro DOMAIN/s: Glycosyl transferase, family 2 (InterPro:IPR001173); BEST Arabidopsis thaliana protein match is: Nucleotide-diphospho-sugar transferas…	0	1	TAIR10	8516238	8519734	-	0	0	0
1	8527533	8529033	MACS_peak_409	502.42	AT1G24110	protein_coding_gene	Peroxidase superfamily protein	---	Peroxidase superfamily protein; FUNCTIONS IN: peroxidase activity, heme binding; INVOLVED IN: response to oxidative stress, oxidation reduction; LOCATED IN: endomembrane system; EXPRESSED IN: sepal, male gametophyte, flower, pollen tube; EXPRESSED DURING: L mature pollen stage, M germinated pollen stage, 4 anthesis; CONTAINS InterPro DOMAIN/s: Haem peroxidase (InterPro:IPR010255), Plant peroxidas…	0	1	TAIR10	8527838	8528818	+	0	0	1
1	8534062	8535856	MACS_peak_410	195.11	AT1G24130	protein_coding_gene	Transducin/WD40 repeat-like superfamily protein	---	Transducin/WD40 repeat-like superfamily protein; FUNCTIONS IN: nucleotide binding; INVOLVED IN: biological_process unknown; LOCATED IN: chloroplast, heterotrimeric G-protein complex; CONTAINS InterPro DOMAIN/s: WD40 repeat 2 (InterPro:IPR019782), WD40 repeat, conserved site (InterPro:IPR019775), WD40 repeat (InterPro:IPR001680), G-protein beta WD-40 repeat, region (InterPro:IPR020472), WD40 repea…	0	1	TAIR10	8534183	8535430	-	0	2	0
1	8535956	8537397	MACS_peak_411	181.41	AT1G24140	protein_coding_gene	Matrixin family protein	---	Matrixin family protein; FUNCTIONS IN: metallopeptidase activity, metalloendopeptidase activity, zinc ion binding; INVOLVED IN: proteolysis, metabolic process; LOCATED IN: anchored to membrane; EXPRESSED IN: 13 plant structures; EXPRESSED DURING: 7 growth stages; CONTAINS InterPro DOMAIN/s: Peptidase M10, metallopeptidase (InterPro:IPR001818), Peptidoglycan binding-like (InterPro:IPR002477), Pept…	0	1	TAIR10	8536045	8537387	-	0	1	1
1	8542819	8543689	MACS_peak_412	79.76	AT1G24147	protein_coding_gene	---	---	unknown protein; FUNCTIONS IN: molecular_function unknown; INVOLVED IN: biological_process unknown; LOCATED IN: endomembrane system; BEST Arabidopsis thaliana protein match is: unknown protein (TAIR:AT1G24148.1); Has 4 Blast hits to 4 proteins in 2 species: Archae - 0; Bacteria - 0; Metazoa - 0; Fungi - 0; Plants - 4; Viruses - 0; Other Eukaryotes - 0 (source: NCBI BLink).	0	1	TAIR10	8542446	8543474	+	0	0	0
1	8544866	8545555	MACS_peak_413	61.01	AT1G24148	protein_coding_gene	---	---	unknown protein; FUNCTIONS IN: molecular_function unknown; INVOLVED IN: biological_process unknown; LOCATED IN: cellular_component unknown; BEST Arabidopsis thaliana protein match is: unknown protein (TAIR:AT1G24147.1).	0	1	TAIR10	8544250	8545551	+	0	0	0
1	8591989	8596674	MACS_peak_414	293.2	AT1G24260	protein_coding_gene	K-box region and MADS-box transcription factor family protein	Member of the MADs box transcription factor family. SEP3 is redundant with SEP1 and 2. Flowers of SEP1/2/3 triple mutants show a conversion of petals and stamens to sepals.SEP3 forms heterotetrameric complexes with other MADS box family members and binds to the CArG box motif.	SEPALLATA3 (SEP3); FUNCTIONS IN: protein binding, DNA binding, sequence-specific DNA binding transcription factor activity; INVOLVED IN: in 6 processes; LOCATED IN: nucleus; EXPRESSED IN: 16 plant structures; EXPRESSED DURING: 7 growth stages; CONTAINS InterPro DOMAIN/s: Transcription factor, MADS-box (InterPro:IPR002100), Transcription factor, K-box (InterPro:IPR002487); BEST Arabidopsis thalian…	0	1	TAIR10	8593637	8596105	-	2	1	0
1	8650437	8653101	MACS_peak_415	235.5	AT1G24400	protein_coding_gene	lysine histidine transporter 2	High-affinity transporter for neutral and acidic amino acids, expressed in tapetum tissue of anthers	lysine histidine transporter 2 (LHT2); CONTAINS InterPro DOMAIN/s: Amino acid transporter, transmembrane (InterPro:IPR013057); BEST Arabidopsis thaliana protein match is: Transmembrane amino acid transporter family protein (TAIR:AT1G67640.1); Has 4292 Blast hits to 4283 proteins in 340 species: Archae - 11; Bacteria - 170; Metazoa - 1210; Fungi - 747; Plants - 1636; Viruses - 0; Other Eukaryotes …	0	1	TAIR10	8651407	8653828	-	0	0	0
1	8673723	8680882	MACS_peak_416	123.25	AT1G24485	protein_coding_gene	---	---	FUNCTIONS IN: molecular_function unknown; INVOLVED IN: biological_process unknown; LOCATED IN: endomembrane system; BEST Arabidopsis thaliana protein match is: protein kinase-related (TAIR:AT3G46280.1); Has 30201 Blast hits to 17322 proteins in 780 species: Archae - 12; Bacteria - 1396; Metazoa - 17338; Fungi - 3422; Plants - 5037; Viruses - 0; Other Eukaryotes - 2996 (source: NCBI BLink).	0	1	TAIR10	8678858	8681894	+	0	3	0
1	8688379	8689461	MACS_peak_417	220.75	AT1G24520	protein_coding_gene	homolog of Brassica campestris pollen protein 1	Male fertility gene acting on tapetum and microspore	homolog of Brassica campestris pollen protein 1 (BCP1); BEST Arabidopsis thaliana protein match is: Anther-specific protein agp1-like (TAIR:AT3G26110.1); Has 67 Blast hits to 55 proteins in 12 species: Archae - 0; Bacteria - 4; Metazoa - 0; Fungi - 2; Plants - 42; Viruses - 0; Other Eukaryotes - 19 (source: NCBI BLink).	0	1	TAIR10	8688629	8689268	+	0	1	0
1	8692875	8694415	MACS_peak_418	71.35	AT1G24530	protein_coding_gene	Transducin/WD40 repeat-like superfamily protein	---	Transducin/WD40 repeat-like superfamily protein; FUNCTIONS IN: nucleotide binding; INVOLVED IN: biological_process unknown; LOCATED IN: plasma membrane, heterotrimeric G-protein complex; EXPRESSED IN: 24 plant structures; EXPRESSED DURING: 14 growth stages; CONTAINS InterPro DOMAIN/s: WD40 repeat 2 (InterPro:IPR019782), WD40 repeat-like-containing domain (InterPro:IPR011046), WD40-repeat-containi…	0	1	TAIR10	8693227	8694705	+	0	1	0
1	8698577	8701513	MACS_peak_419	202.84	AT1G24540	protein_coding_gene	cytochrome P450, family 86, subfamily C, polypeptide 1	member of CYP86C	cytochrome P450, family 86, subfamily C, polypeptide 1 (CYP86C1); FUNCTIONS IN: electron carrier activity, monooxygenase activity, iron ion binding, oxygen binding, heme binding; INVOLVED IN: oxidation reduction; LOCATED IN: endomembrane system; EXPRESSED IN: petal, embryo, sepal, pedicel; EXPRESSED DURING: 4 anthesis, C globular stage, petal differentiation and expansion stage; CONTAINS InterPro…	0	1	TAIR10	8699751	8701421	+	0	0	0
1	8713606	8719306	MACS_peak_420	375.14	AT1G24590	protein_coding_gene	DORNROSCHEN-like	Encodes a member of the ERF (ethylene response factor) subfamily B-1 of ERF/AP2 transcription factor family. The protein contains one AP2 domain. There are 15 members in this subfamily including ATERF-3, ATERF-4, ATERF-7, and LEAFY PETIOLE. This gene functions in the regeneration of shoots in tissue culture, probably through transcriptional regulation of CUC1. May also be involved in activation o…	DORNROSCHEN-like (DRNL); FUNCTIONS IN: DNA binding, sequence-specific DNA binding transcription factor activity; INVOLVED IN: in 6 processes; LOCATED IN: nucleus, chloroplast; EXPRESSED IN: embryo, leaf primordium, seed; EXPRESSED DURING: C globular stage, D bilateral stage, E expanded cotyledon stage; CONTAINS InterPro DOMAIN/s: DNA-binding, integrase-type (InterPro:IPR016177), Pathogenesis-rela…	0	1	TAIR10	8714389	8715309	-	1	3	1
1	8723565	8724588	MACS_peak_421	152.22	AT1G24620	protein_coding_gene	EF hand calcium-binding protein family	Encodes a EF-hand calcium-binding protein family member. Mutants exhibit longer root hairs under phosphate-deficient conditions.	EF hand calcium-binding protein family; FUNCTIONS IN: calcium ion binding; INVOLVED IN: response to cold; LOCATED IN: nucleus, cytoplasm; EXPRESSED IN: 7 plant structures; EXPRESSED DURING: L mature pollen stage, M germinated pollen stage, 4 anthesis, petal differentiation and expansion stage; CONTAINS InterPro DOMAIN/s: EF-Hand 1, calcium-binding site (InterPro:IPR018247), EF-HAND 2 (InterPro:IP…	0	1	TAIR10	8723712	8724459	-	0	0	0
1	8738520	8739463	MACS_peak_422	61.53	---	---	---	---	---	---	---	---	---	---	---	1	0	0
1	8756825	8757954	MACS_peak_423	207.48	AT1G24735	protein_coding_gene	S-adenosyl-L-methionine-dependent methyltransferases superfamily protein	---	S-adenosyl-L-methionine-dependent methyltransferases superfamily protein; FUNCTIONS IN: O-methyltransferase activity; LOCATED IN: cytosol; EXPRESSED IN: stem, leaf apex, root, flower; EXPRESSED DURING: petal differentiation and expansion stage; CONTAINS InterPro DOMAIN/s: O-methyltransferase, family 3 (InterPro:IPR002935); BEST Arabidopsis thaliana protein match is: caffeoyl-CoA 3-O-methyltransfe…	0	1	TAIR10	8757864	8759645	+	0	0	0
1	8844751	8847611	MACS_peak_424	246.7	AT1G25240	protein_coding_gene	ENTH/VHS/GAT family protein	---	ENTH/VHS/GAT family protein; FUNCTIONS IN: phospholipid binding, clathrin binding, binding, phosphatidylinositol binding; INVOLVED IN: clathrin coat assembly; LOCATED IN: clathrin coat, mitochondrion; EXPRESSED IN: 10 plant structures; EXPRESSED DURING: L mature pollen stage, M germinated pollen stage, 4 anthesis, C globular stage, petal differentiation and expansion stage; CONTAINS InterPro DOMA…	0	1	TAIR10	8845231	8846493	+	0	1	0
1	8848781	8853287	MACS_peak_425	92.27	AT1G25250	protein_coding_gene	indeterminate(ID)-domain 16	---	indeterminate(ID)-domain 16 (IDD16); FUNCTIONS IN: sequence-specific DNA binding transcription factor activity, zinc ion binding, nucleic acid binding; INVOLVED IN: regulation of transcription; LOCATED IN: intracellular; EXPRESSED IN: 22 plant structures; EXPRESSED DURING: 14 growth stages; CONTAINS InterPro DOMAIN/s: Zinc finger, C2H2-like (InterPro:IPR015880), Zinc finger, C2H2-type (InterPro:I…	0	1	TAIR10	8849549	8851612	+	1	1	2
1	8856642	8859463	MACS_peak_426	217.06	AT1G25270	protein_coding_gene	nodulin MtN21 /EamA-like transporter family protein	nodulin MtN21-like transporter family protein	nodulin MtN21 /EamA-like transporter family protein; LOCATED IN: endomembrane system, membrane; CONTAINS InterPro DOMAIN/s: Protein of unknown function DUF6, transmembrane (InterPro:IPR000620); BEST Arabidopsis thaliana protein match is: nodulin MtN21 /EamA-like transporter family protein (TAIR:AT1G68170.1); Has 2335 Blast hits to 2323 proteins in 458 species: Archae - 9; Bacteria - 937; Metazoa …	0	1	TAIR10	8857726	8859909	+	0	1	0
1	8871221	8872827	MACS_peak_427	232.41	AT1G25300	protein_coding_gene	Octicosapeptide/Phox/Bem1p family protein	---	Octicosapeptide/Phox/Bem1p family protein; CONTAINS InterPro DOMAIN/s: Octicosapeptide/Phox/Bem1p (InterPro:IPR000270); BEST Arabidopsis thaliana protein match is: Octicosapeptide/Phox/Bem1p family protein (TAIR:AT2G01190.1); Has 352 Blast hits to 352 proteins in 16 species: Archae - 0; Bacteria - 0; Metazoa - 0; Fungi - 0; Plants - 352; Viruses - 0; Other Eukaryotes - 0 (source: NCBI BLink).	0	1	TAIR10	8871568	8872386	+	2	1	0
1	8873654	8877622	MACS_peak_428	66.16	AT1G25310	protein_coding_gene	basic helix-loop-helix (bHLH) DNA-binding family protein	---	maternal effect embryo arrest 8 (MEE8); CONTAINS InterPro DOMAIN/s: Helix-loop-helix DNA-binding domain (InterPro:IPR001092); Has 109 Blast hits to 109 proteins in 9 species: Archae - 0; Bacteria - 0; Metazoa - 0; Fungi - 0; Plants - 109; Viruses - 0; Other Eukaryotes - 0 (source: NCBI BLink).	0	1	TAIR10	8874124	8874834	-	2	0	0
1	8880401	8882487	MACS_peak_429	175.39	AT1G25330	protein_coding_gene	basic helix-loop-helix (bHLH) DNA-binding superfamily protein	Encodes CESTA, a positive regulator of brassinosteroid biosynthesis.	basic helix-loop-helix (bHLH) DNA-binding superfamily protein; FUNCTIONS IN: DNA binding, sequence-specific DNA binding transcription factor activity; INVOLVED IN: regulation of transcription; LOCATED IN: nucleus; EXPRESSED IN: 7 plant structures; EXPRESSED DURING: 4 anthesis, C globular stage, petal differentiation and expansion stage; CONTAINS InterPro DOMAIN/s: Helix-loop-helix DNA-binding dom…	0	1	TAIR10	8880267	8882100	-	0	1	0
1	8884893	8888558	MACS_peak_430	162.55	AT1G25340	protein_coding_gene	myb domain protein 116	putative transcription factor (MYB116)	myb domain protein 116 (MYB116); CONTAINS InterPro DOMAIN/s: SANT, DNA-binding (InterPro:IPR001005), Homeodomain-like (InterPro:IPR009057), Myb, DNA-binding (InterPro:IPR014778), HTH transcriptional regulator, Myb-type, DNA-binding (InterPro:IPR017930), Homeodomain-related (InterPro:IPR012287), Myb transcription factor (InterPro:IPR015495); BEST Arabidopsis thaliana protein match is: myb domain p…	0	1	TAIR10	8885081	8886398	+	0	1	0
1	8913350	8915717	MACS_peak_431	404.87	AT1G25410	protein_coding_gene	isopentenyltransferase 6	AB061404 Arabidopsis thaliana AtIPT6 mRNA for cytokinin synthase, complete cds	isopentenyltransferase 6 (IPT6); CONTAINS InterPro DOMAIN/s: tRNA isopentenyltransferase (InterPro:IPR002627); BEST Arabidopsis thaliana protein match is: isopentenyltransferase 1 (TAIR:AT1G68460.1); Has 7248 Blast hits to 7187 proteins in 2504 species: Archae - 0; Bacteria - 4974; Metazoa - 135; Fungi - 135; Plants - 290; Viruses - 0; Other Eukaryotes - 1714 (source: NCBI BLink).	0	1	TAIR10	8914191	8915219	-	0	1	1
1	8938501	8940318	MACS_peak_432	224.7	AT1G25450	protein_coding_gene	3-ketoacyl-CoA synthase 5	Encodes KCS5, a member of the 3-ketoacyl-CoA synthase family involved in the biosynthesis of VLCFA (very long chain fatty acids).	3-ketoacyl-CoA synthase 5 (KCS5); FUNCTIONS IN: fatty acid elongase activity; INVOLVED IN: in 6 processes; LOCATED IN: endoplasmic reticulum, membrane; EXPRESSED IN: 22 plant structures; EXPRESSED DURING: 13 growth stages; CONTAINS InterPro DOMAIN/s: Thiolase-like (InterPro:IPR016039), Very-long-chain 3-ketoacyl-CoA synthase (InterPro:IPR012392), 3-Oxoacyl-[acyl-carrier-protein (ACP)] synthase II…	0	1	TAIR10	8938479	8940387	-	0	0	1
1	8988759	8990568	MACS_peak_433	319.49	---	---	---	---	---	---	---	---	---	---	---	0	1	0
1	9063294	9064775	MACS_peak_434	157.23	AT1G26200	protein_coding_gene	TRAM, LAG1 and CLN8 (TLC) lipid-sensing domain containing protein	---	TRAM, LAG1 and CLN8 (TLC) lipid-sensing domain containing protein; FUNCTIONS IN: molecular_function unknown; INVOLVED IN: biological_process unknown; LOCATED IN: integral to membrane; CONTAINS InterPro DOMAIN/s: Longevity assurance, LAG1/LAC1 (InterPro:IPR016439), TRAM/LAG1/CLN8 homology domain (InterPro:IPR006634); BEST Arabidopsis thaliana protein match is: LAG1 longevity assurance homolog 3 (T…	0	1	TAIR10	9063471	9064914	-	0	0	0
1	9079969	9085817	MACS_peak_435	228.74	AT1G26250	protein_coding_gene	Proline-rich extensin-like family protein	---	Proline-rich extensin-like family protein; FUNCTIONS IN: structural constituent of cell wall; INVOLVED IN: plant-type cell wall organization; LOCATED IN: endomembrane system; CONTAINS InterPro DOMAIN/s: Extensin-like repeat (InterPro:IPR006706); BEST Arabidopsis thaliana protein match is: Proline-rich extensin-like family protein (TAIR:AT4G08370.1); Has 289174 Blast hits to 44674 proteins in 1767…	0	1	TAIR10	9083838	9085464	+	0	1	0
1	9099977	9107420	MACS_peak_436	154.38	AT1G26320	protein_coding_gene	Zinc-binding dehydrogenase family protein	---	Zinc-binding dehydrogenase family protein; FUNCTIONS IN: oxidoreductase activity, binding, catalytic activity, zinc ion binding; INVOLVED IN: response to oxidative stress; EXPRESSED IN: 7 plant structures; EXPRESSED DURING: L mature pollen stage, M germinated pollen stage, 4 anthesis, petal differentiation and expansion stage; CONTAINS InterPro DOMAIN/s: GroES-like (InterPro:IPR011032), NAD(P)-bi…	0	1	TAIR10	9105038	9107189	+	3	3	0
1	9117264	9118999	MACS_peak_437	393.02	AT1G26360	protein_coding_gene	methyl esterase 13	Encodes a protein predicted to act as a carboxylesterase. It has similarity to the SABP2 methyl salicylate esterase from tobacco but no enzymatic activity has been identified for this protein.	methyl esterase 13 (MES13); FUNCTIONS IN: hydrolase activity; INVOLVED IN: N-terminal protein myristoylation; LOCATED IN: chloroplast; EXPRESSED IN: pollen tube; CONTAINS InterPro DOMAIN/s: Alpha/beta hydrolase fold-1 (InterPro:IPR000073); BEST Arabidopsis thaliana protein match is: methyl esterase 15 (TAIR:AT1G69240.1); Has 2167 Blast hits to 2165 proteins in 544 species: Archae - 4; Bacteria - …	0	1	TAIR10	9118948	9121217	-	1	0	0
1	9127177	9128694	MACS_peak_438	133.94	AT1G26380	protein_coding_gene	FAD-binding Berberine family protein	---	FAD-binding Berberine family protein; FUNCTIONS IN: electron carrier activity, oxidoreductase activity, FAD binding, catalytic activity; LOCATED IN: endomembrane system; EXPRESSED IN: 9 plant structures; EXPRESSED DURING: LP.06 six leaves visible, LP.04 four leaves visible, 4 anthesis, LP.08 eight leaves visible; CONTAINS InterPro DOMAIN/s: FAD-binding, type 2 (InterPro:IPR016166), Berberine/berb…	0	1	TAIR10	9126737	9128528	-	0	0	0
1	9129640	9132203	MACS_peak_439	125.53	AT1G26390	protein_coding_gene	FAD-binding Berberine family protein	---	FAD-binding Berberine family protein; FUNCTIONS IN: electron carrier activity, oxidoreductase activity, FAD binding, catalytic activity; LOCATED IN: endomembrane system; EXPRESSED IN: 10 plant structures; EXPRESSED DURING: LP.06 six leaves visible, LP.04 four leaves visible, 4 anthesis, LP.02 two leaves visible, petal differentiation and expansion stage; CONTAINS InterPro DOMAIN/s: FAD-binding, t…	0	1	TAIR10	9130017	9131779	-	0	0	0
1	9139095	9140504	MACS_peak_440	139.18	AT1G26410	protein_coding_gene	FAD-binding Berberine family protein	---	FAD-binding Berberine family protein; FUNCTIONS IN: electron carrier activity, oxidoreductase activity, FAD binding, catalytic activity; LOCATED IN: cellular_component unknown; CONTAINS InterPro DOMAIN/s: FAD-binding, type 2 (InterPro:IPR016166), Berberine/berberine-like (InterPro:IPR012951), FAD linked oxidase, N-terminal (InterPro:IPR006094); BEST Arabidopsis thaliana protein match is: FAD-bind…	0	1	TAIR10	9138675	9140439	-	0	0	0
1	9141446	9143349	MACS_peak_441	213.65	AT1G26420	protein_coding_gene	FAD-binding Berberine family protein	---	FAD-binding Berberine family protein; FUNCTIONS IN: electron carrier activity, oxidoreductase activity, FAD binding, catalytic activity; LOCATED IN: endomembrane system; EXPRESSED IN: stem, stamen; EXPRESSED DURING: 4 anthesis; CONTAINS InterPro DOMAIN/s: FAD-binding, type 2 (InterPro:IPR016166), Berberine/berberine-like (InterPro:IPR012951), FAD linked oxidase, N-terminal (InterPro:IPR006094); B…	0	1	TAIR10	9141567	9143304	-	1	1	0
1	9160027	9163148	MACS_peak_442	853.24	AT1G26515	protein_coding_gene	F-box and associated interaction domains-containing protein	---	F-box and associated interaction domains-containing protein; CONTAINS InterPro DOMAIN/s: F-box domain, Skp2-like (InterPro:IPR022364), F-box associated domain, type 3 (InterPro:IPR013187), F-box associated interaction domain (InterPro:IPR017451); BEST Arabidopsis thaliana protein match is: F-box associated ubiquitination effector family protein (TAIR:AT1G26510.1).	0	1	TAIR10	9161810	9162910	-	0	1	1
1	9191372	9192358	MACS_peak_443	306.16	AT1G26600	protein_coding_gene	CLAVATA3/ESR-RELATED 9	Member of a large family of putative ligands homologous to the Clavata3 gene. Consists of a single exon. Can partially replace CLV3 function in vivo.	CLAVATA3/ESR-RELATED 9 (CLE9); BEST Arabidopsis thaliana protein match is: CLAVATA3/ESR-RELATED 10 (TAIR:AT1G69320.1); Has 71 Blast hits to 71 proteins in 14 species: Archae - 0; Bacteria - 0; Metazoa - 0; Fungi - 0; Plants - 71; Viruses - 0; Other Eukaryotes - 0 (source: NCBI BLink).	0	1	TAIR10	9191607	9192401	+	0	1	0
1	9225796	9227920	MACS_peak_444	151.29	AT1G26690	protein_coding_gene	emp24/gp25L/p24 family/GOLD family protein	---	emp24/gp25L/p24 family/GOLD family protein; FUNCTIONS IN: protein transmembrane transporter activity; INVOLVED IN: intracellular protein transport, transport; LOCATED IN: endomembrane system, integral to membrane, membrane; EXPRESSED IN: 22 plant structures; EXPRESSED DURING: 13 growth stages; CONTAINS InterPro DOMAIN/s: GOLD (InterPro:IPR009038), emp24/gp25L/p24 (InterPro:IPR000348); BEST Arabid…	-22	1	TAIR10	9224145	9225775	-	0	0	0
1	9269296	9273214	MACS_peak_445	250.44	AT1G26780	protein_coding_gene	myb domain protein 117	Encodes LOF1 (LATERAL ORGAN FUSION1), a MYB-domain transcription factor expressed in organ boundaries. Functions in boundary specification, meristem initiation and maintenance, and organ patterning. Also see LOF2 (At1g69560).	myb domain protein 117 (MYB117); CONTAINS InterPro DOMAIN/s: SANT, DNA-binding (InterPro:IPR001005), Homeodomain-like (InterPro:IPR009057), Myb, DNA-binding (InterPro:IPR014778), HTH transcriptional regulator, Myb-type, DNA-binding (InterPro:IPR017930), Homeodomain-related (InterPro:IPR012287), Myb transcription factor (InterPro:IPR015495); BEST Arabidopsis thaliana protein match is: myb domain p…	0	1	TAIR10	9271029	9272463	+	0	3	1
1	9276235	9278524	MACS_peak_446	91.66	AT1G26795	protein_coding_gene	Plant self-incompatibility protein S1 family	---	Plant self-incompatibility protein S1 family; FUNCTIONS IN: molecular_function unknown; INVOLVED IN: biological_process unknown; LOCATED IN: endomembrane system; EXPRESSED IN: 12 plant structures; EXPRESSED DURING: 7 growth stages; CONTAINS InterPro DOMAIN/s: Plant self-incompatibility S1 (InterPro:IPR010264); BEST Arabidopsis thaliana protein match is: Plant self-incompatibility protein S1 famil…	0	1	TAIR10	9276381	9276954	+	2	0	0
1	9281621	9283110	MACS_peak_447	129.78	AT1G26798	protein_coding_gene	Plant self-incompatibility protein S1 family	---	Plant self-incompatibility protein S1 family; FUNCTIONS IN: molecular_function unknown; INVOLVED IN: biological_process unknown; LOCATED IN: endomembrane system; CONTAINS InterPro DOMAIN/s: Plant self-incompatibility S1 (InterPro:IPR010264); BEST Arabidopsis thaliana protein match is: Plant self-incompatibility protein S1 family (TAIR:AT1G26797.1); Has 35333 Blast hits to 34131 proteins in 2444 s…	0	1	TAIR10	9281791	9282341	+	0	0	0
1	9291443	9292622	MACS_peak_448	78.32	AT1G26820	protein_coding_gene	ribonuclease 3	Encodes ribonuclease RNS3.	ribonuclease 3 (RNS3); FUNCTIONS IN: ribonuclease T2 activity, endoribonuclease activity, RNA binding; INVOLVED IN: aging; LOCATED IN: endomembrane system; EXPRESSED IN: 21 plant structures; EXPRESSED DURING: 12 growth stages; CONTAINS InterPro DOMAIN/s: Ribonuclease T2 (InterPro:IPR001568), Ribonuclease T2, active site (InterPro:IPR018188); BEST Arabidopsis thaliana protein match is: Ribonucleas…	0	1	TAIR10	9292446	9293784	-	0	0	0
1	9309200	9313925	MACS_peak_449	393.61	AT1G26870	protein_coding_gene	NAC (No Apical Meristem) domain transcriptional regulator superfamily protein	---	FEZ (FEZ); CONTAINS InterPro DOMAIN/s: No apical meristem (NAM) protein (InterPro:IPR003441); BEST Arabidopsis thaliana protein match is: NAC domain containing protein 94 (TAIR:AT5G39820.1); Has 2973 Blast hits to 2966 proteins in 76 species: Archae - 0; Bacteria - 0; Metazoa - 2; Fungi - 0; Plants - 2971; Viruses - 0; Other Eukaryotes - 0 (source: NCBI BLink).	0	1	TAIR10	9312856	9314983	+	2	2	0
1	9350981	9353120	MACS_peak_450	184.28	AT1G26945	protein_coding_gene	basic helix-loop-helix (bHLH) DNA-binding superfamily protein	Encodes a basic helix-loop-helix (bHLH) protein involved in blue/far-red light signaling. Physically interacts with HFR1 and negatively regulates its activity.	KIDARI (KDR); FUNCTIONS IN: transcription regulator activity; INVOLVED IN: response to light stimulus; LOCATED IN: nucleus, chloroplast; CONTAINS InterPro DOMAIN/s: Helix-loop-helix DNA-binding domain (InterPro:IPR001092), Helix-loop-helix DNA-binding (InterPro:IPR011598); BEST Arabidopsis thaliana protein match is: basic helix-loop-helix (bHLH) DNA-binding family protein (TAIR:AT3G28857.1); Has …	0	1	TAIR10	9351454	9352761	+	0	2	0
1	9360836	9361903	MACS_peak_451	101.57	AT1G26970	protein_coding_gene	Protein kinase superfamily protein	---	Protein kinase superfamily protein; FUNCTIONS IN: protein serine/threonine kinase activity, protein kinase activity, kinase activity, ATP binding; INVOLVED IN: protein amino acid phosphorylation, N-terminal protein myristoylation; LOCATED IN: chloroplast; CONTAINS InterPro DOMAIN/s: Protein kinase, ATP binding site (InterPro:IPR017441), Protein kinase, catalytic domain (InterPro:IPR000719), Serin…	0	1	TAIR10	9359682	9361833	+	0	0	0
1	9362284	9363383	MACS_peak_452	104.66	AT1G26973	miRNA	MIR395A; miRNA	Encodes a microRNA that targets both APS and AST family members. MicroRNAs are regulatory RNAs with a mature length of ~21-nucleotides that are processed from hairpin precursors by Dicer-like enzymes. MicroRNAs can negatively regulate gene expression by attenuating translation or by directing mRNA cleavage.Mature sequence: CUGAAGUGUUUGGGGGAACUC. Predicted targets are ATP sulfurylases.	---	0	1	TAIR10	9363196	9363288	-	0	0	0
1	9379288	9380607	MACS_peak_453	98.42	AT1G27020	protein_coding_gene	---	---	unknown protein; BEST Arabidopsis thaliana protein match is: unknown protein (TAIR:AT1G27030.1); Has 514 Blast hits to 514 proteins in 175 species: Archae - 0; Bacteria - 311; Metazoa - 0; Fungi - 0; Plants - 65; Viruses - 0; Other Eukaryotes - 138 (source: NCBI BLink).	0	1	TAIR10	9378559	9380692	+	0	0	0
1	9381845	9384184	MACS_peak_454	83.54	AT1G27030	protein_coding_gene	---	---	unknown protein; BEST Arabidopsis thaliana protein match is: unknown protein (TAIR:AT1G27020.1); Has 504 Blast hits to 502 proteins in 169 species: Archae - 0; Bacteria - 299; Metazoa - 0; Fungi - 0; Plants - 67; Viruses - 0; Other Eukaryotes - 138 (source: NCBI BLink).	0	1	TAIR10	9381803	9383984	+	0	0	0
1	9386823	9388594	MACS_peak_455	90.61	AT1G27040	protein_coding_gene	Major facilitator superfamily protein	---	Major facilitator superfamily protein; FUNCTIONS IN: transporter activity; INVOLVED IN: oligopeptide transport; LOCATED IN: membrane; EXPRESSED IN: 6 plant structures; EXPRESSED DURING: 4 anthesis, petal differentiation and expansion stage; CONTAINS InterPro DOMAIN/s: Oligopeptide transporter (InterPro:IPR000109), Major facilitator superfamily, general substrate transporter (InterPro:IPR016196); …	0	1	TAIR10	9386784	9390042	-	0	0	0
1	9388661	9390246	MACS_peak_456	269.55	AT1G27040	protein_coding_gene	Major facilitator superfamily protein	---	Major facilitator superfamily protein; FUNCTIONS IN: transporter activity; INVOLVED IN: oligopeptide transport; LOCATED IN: membrane; EXPRESSED IN: 6 plant structures; EXPRESSED DURING: 4 anthesis, petal differentiation and expansion stage; CONTAINS InterPro DOMAIN/s: Oligopeptide transporter (InterPro:IPR000109), Major facilitator superfamily, general substrate transporter (InterPro:IPR016196); …	0	1	TAIR10	9386784	9390042	-	0	1	1
1	9453061	9454282	MACS_peak_457	88.09	---	---	---	---	---	---	---	---	---	---	---	0	0	0
1	9537620	9539837	MACS_peak_458	606.53	AT1G27461	protein_coding_gene	---	---	unknown protein; Has 30201 Blast hits to 17322 proteins in 780 species: Archae - 12; Bacteria - 1396; Metazoa - 17338; Fungi - 3422; Plants - 5037; Viruses - 0; Other Eukaryotes - 2996 (source: NCBI BLink).	0	1	TAIR10	9537746	9539013	-	1	0	0
1	9546376	9547302	MACS_peak_459	174.77	AT1G27490	protein_coding_gene	F-box and associated interaction domains-containing protein	---	F-box and associated interaction domains-containing protein; CONTAINS InterPro DOMAIN/s: F-box domain, Skp2-like (InterPro:IPR022364), F-box associated domain, type 1 (InterPro:IPR006527); BEST Arabidopsis thaliana protein match is: F-box and associated interaction domains-containing protein (TAIR:AT3G23260.1); Has 90 Blast hits to 84 proteins in 2 species: Archae - 0; Bacteria - 0; Metazoa - 0; …	0	1	TAIR10	9546373	9547073	-	1	0	0
1	9568516	9572254	MACS_peak_460	736.56	AT1G27550	protein_coding_gene	F-box family protein	---	F-box family protein; BEST Arabidopsis thaliana protein match is: Protein of unknown function (DUF295) (TAIR:AT1G27580.1); Has 105 Blast hits to 103 proteins in 3 species: Archae - 0; Bacteria - 0; Metazoa - 0; Fungi - 0; Plants - 105; Viruses - 0; Other Eukaryotes - 0 (source: NCBI BLink).	0	1	TAIR10	9568813	9569330	-	1	1	0
1	9588030	9588862	MACS_peak_461	70.07	---	---	---	---	---	---	---	---	---	---	---	0	0	0
1	9606834	9610851	MACS_peak_462	519.4	AT1G27620	protein_coding_gene	HXXXD-type acyl-transferase family protein	---	HXXXD-type acyl-transferase family protein; FUNCTIONS IN: transferase activity, transferring acyl groups other than amino-acyl groups, transferase activity; INVOLVED IN: biological_process unknown; LOCATED IN: cellular_component unknown; EXPRESSED IN: synergid, pollen tube; CONTAINS InterPro DOMAIN/s: Transferase (InterPro:IPR003480); BEST Arabidopsis thaliana protein match is: HXXXD-type acyl-tr…	0	1	TAIR10	9608418	9610542	+	0	2	1
1	9652180	9656998	MACS_peak_463	305.95	AT1G27740	protein_coding_gene	root hair defective 6-like 4	Basic helix-loop-helix (bHLH) transcription factor that is sufficient to promote postmitotic cell growth in root-hair cells. RSL4 is a direct transcriptional target of RHD6	root hair defective 6-like 4 (RSL4); FUNCTIONS IN: DNA binding, sequence-specific DNA binding transcription factor activity; INVOLVED IN: root hair initiation, response to auxin stimulus, positive regulation of transcription, cell growth, regulation of transcription; LOCATED IN: nucleus; EXPRESSED IN: trichoblast, root; EXPRESSED DURING: 5 root hair formation; CONTAINS InterPro DOMAIN/s: Helix-lo…	0	1	TAIR10	9654688	9656089	+	2	0	0
1	9703927	9708687	MACS_peak_464	420.54	AT1G27850	protein_coding_gene	---	---	unknown protein; FUNCTIONS IN: molecular_function unknown; INVOLVED IN: biological_process unknown; LOCATED IN: plasma membrane; EXPRESSED IN: 22 plant structures; EXPRESSED DURING: 13 growth stages; BEST Arabidopsis thaliana protein match is: unknown protein (TAIR:AT2G40070.1); Has 9215 Blast hits to 5316 proteins in 473 species: Archae - 6; Bacteria - 773; Metazoa - 3392; Fungi - 1710; Plants -…	0	1	TAIR10	9698417	9703941	+	1	3	0
1	9753450	9754185	MACS_peak_465	128.71	AT1G27990	protein_coding_gene	---	---	unknown protein; BEST Arabidopsis thaliana protein match is: unknown protein (TAIR:AT5G52420.1); Has 86 Blast hits to 86 proteins in 15 species: Archae - 0; Bacteria - 0; Metazoa - 0; Fungi - 0; Plants - 84; Viruses - 0; Other Eukaryotes - 2 (source: NCBI BLink).	0	1	TAIR10	9752799	9753952	-	0	0	0
1	9756648	9757802	MACS_peak_466	152.98	AT1G28000	protein_coding_gene	Pentatricopeptide repeat (PPR) superfamily protein	---	Pentatricopeptide repeat (PPR) superfamily protein; FUNCTIONS IN: molecular_function unknown; INVOLVED IN: biological_process unknown; LOCATED IN: mitochondrion; BEST Arabidopsis thaliana protein match is: Tetratricopeptide repeat (TPR)-like superfamily protein (TAIR:AT1G28020.1); Has 30201 Blast hits to 17322 proteins in 780 species: Archae - 12; Bacteria - 1396; Metazoa - 17338; Fungi - 3422; P…	0	1	TAIR10	9756674	9757963	-	0	1	0
1	9769640	9770785	MACS_peak_467	67.55	AT1G28020	protein_coding_gene	Tetratricopeptide repeat (TPR)-like superfamily protein	---	Tetratricopeptide repeat (TPR)-like superfamily protein; CONTAINS InterPro DOMAIN/s: Pentatricopeptide repeat (InterPro:IPR002885); BEST Arabidopsis thaliana protein match is: Pentatricopeptide repeat (PPR) superfamily protein (TAIR:AT3G11380.1); Has 2264 Blast hits to 1608 proteins in 100 species: Archae - 2; Bacteria - 23; Metazoa - 10; Fungi - 2; Plants - 2192; Viruses - 0; Other Eukaryotes - …	0	1	TAIR10	9768395	9771157	-	0	0	0
1	9772828	9774262	MACS_peak_468	99.9	AT1G28040	protein_coding_gene	RING/U-box superfamily protein	---	RING/U-box superfamily protein; FUNCTIONS IN: zinc ion binding; CONTAINS InterPro DOMAIN/s: Zinc finger, RING-type (InterPro:IPR001841), Zinc finger, C3HC4 RING-type (InterPro:IPR018957); BEST Arabidopsis thaliana protein match is: RING/U-box superfamily protein (TAIR:AT2G46494.1); Has 8456 Blast hits to 8431 proteins in 273 species: Archae - 0; Bacteria - 0; Metazoa - 1947; Fungi - 512; Plants -…	0	1	TAIR10	9773580	9775481	-	1	0	0
1	9839092	9840503	MACS_peak_469	194.89	AT1G28160	protein_coding_gene	Integrase-type DNA-binding superfamily protein	encodes a member of the ERF (ethylene response factor) subfamily B-1 of ERF/AP2 transcription factor family. The protein contains one AP2 domain. There are 15 members in this subfamily including ATERF-3, ATERF-4, ATERF-7, and leafy petiole.	Integrase-type DNA-binding superfamily protein; CONTAINS InterPro DOMAIN/s: DNA-binding, integrase-type (InterPro:IPR016177), Pathogenesis-related transcriptional factor/ERF, DNA-binding (InterPro:IPR001471); BEST Arabidopsis thaliana protein match is: Integrase-type DNA-binding superfamily protein (TAIR:AT5G13910.1); Has 5516 Blast hits to 5465 proteins in 246 species: Archae - 0; Bacteria - 0; …	0	1	TAIR10	9839387	9840124	+	0	0	0
1	9882546	9883914	MACS_peak_470	328.18	AT1G28270	protein_coding_gene	ralf-like 4	Member of a diversely expressed predicted peptide family showing sequence similarity to tobacco Rapid Alkalinization Factor (RALF), and is believed to play an essential role in the physiology of Arabidopsis. Consists of a single exon and is characterized by a conserved C-terminal motif and N-terminal signal peptide.	ralf-like 4 (RALFL4); CONTAINS InterPro DOMAIN/s: Rapid ALkalinization Factor (InterPro:IPR008801); BEST Arabidopsis thaliana protein match is: ralf-like 19 (TAIR:AT2G33775.1); Has 245 Blast hits to 245 proteins in 20 species: Archae - 0; Bacteria - 0; Metazoa - 0; Fungi - 2; Plants - 243; Viruses - 0; Other Eukaryotes - 0 (source: NCBI BLink).	0	1	TAIR10	9883038	9883870	+	0	0	0
1	9889123	9891112	MACS_peak_471	359.32	AT1G28290	protein_coding_gene	arabinogalactan protein 31	Encodes an atypical arabinogalactan protein that is localized to the plasma membrange. AGP31 is highly expressed in flowers and vascular tissue and is repressed by jasmonic acid. AGP31 may play a role in vascular tissue function during defense and development.	arabinogalactan protein 31 (AGP31); CONTAINS InterPro DOMAIN/s: Pollen Ole e 1 allergen/extensin (InterPro:IPR006041); BEST Arabidopsis thaliana protein match is: arabinogalactan protein 30 (TAIR:AT2G33790.1); Has 151286 Blast hits to 46459 proteins in 2422 species: Archae - 571; Bacteria - 36421; Metazoa - 49452; Fungi - 15190; Plants - 16901; Viruses - 4924; Other Eukaryotes - 27827 (source: NC…	0	1	TAIR10	9889125	9890993	-	0	2	0
1	9896248	9902227	MACS_peak_472	62.74	AT1G28300	protein_coding_gene	AP2/B3-like transcriptional factor family protein	Transcription factor that contains a B3 domain, a DNA-binding motif unique to plants and characteristic of several transcription factors. Plays critical roles both early and late during embryo development. LEC2 RNA accumulates primarily during seed development. LEC2 is required for the maintenance of suspensor morphology, specification of cotyledon identity, progression through the maturation pha…	LEAFY COTYLEDON 2 (LEC2); CONTAINS InterPro DOMAIN/s: Transcriptional factor B3 (InterPro:IPR003340); BEST Arabidopsis thaliana protein match is: AP2/B3-like transcriptional factor family protein (TAIR:AT3G26790.1); Has 515 Blast hits to 514 proteins in 42 species: Archae - 0; Bacteria - 0; Metazoa - 0; Fungi - 0; Plants - 515; Viruses - 0; Other Eukaryotes - 0 (source: NCBI BLink).	0	1	TAIR10	9896867	9899876	-	1	4	1
1	9910185	9914182	MACS_peak_473	90	AT1G28310	protein_coding_gene	Dof-type zinc finger DNA-binding family protein	---	Dof-type zinc finger DNA-binding family protein; CONTAINS InterPro DOMAIN/s: Zinc finger, Dof-type (InterPro:IPR003851); BEST Arabidopsis thaliana protein match is: OBF-binding protein 3 (TAIR:AT3G55370.2); Has 1299 Blast hits to 1242 proteins in 95 species: Archae - 0; Bacteria - 24; Metazoa - 66; Fungi - 20; Plants - 1091; Viruses - 0; Other Eukaryotes - 98 (source: NCBI BLink).	0	1	TAIR10	9911898	9913837	-	0	3	0
1	9928490	9929336	MACS_peak_474	50.31	---	---	---	---	---	---	---	---	---	---	---	1	0	0
1	9951299	9953137	MACS_peak_475	593.62	AT1G28360	protein_coding_gene	ERF domain protein 12	encodes a member of the ERF (ethylene response factor) subfamily B-1 of ERF/AP2 transcription factor family (ERF12). The protein contains one AP2 domain. There are 15 members in this subfamily including ATERF-3, ATERF-4, ATERF-7, and leafy petiole.	ERF domain protein 12 (ERF12); CONTAINS InterPro DOMAIN/s: DNA-binding, integrase-type (InterPro:IPR016177), Pathogenesis-related transcriptional factor/ERF, DNA-binding (InterPro:IPR001471); BEST Arabidopsis thaliana protein match is: ethylene responsive element binding factor 4 (TAIR:AT3G15210.1); Has 5550 Blast hits to 5447 proteins in 245 species: Archae - 0; Bacteria - 0; Metazoa - 1; Fungi …	0	1	TAIR10	9951848	9952740	+	0	1	1
1	9960955	9962033	MACS_peak_476	118.69	AT1G28375	protein_coding_gene	---	---	unknown protein; FUNCTIONS IN: molecular_function unknown; INVOLVED IN: biological_process unknown; LOCATED IN: endomembrane system; EXPRESSED IN: petal, leaf whorl, sepal, flower; EXPRESSED DURING: 4 anthesis, petal differentiation and expansion stage; Has 8 Blast hits to 8 proteins in 2 species: Archae - 0; Bacteria - 0; Metazoa - 0; Fungi - 0; Plants - 8; Viruses - 0; Other Eukaryotes - 0 (sou…	0	1	TAIR10	9961055	9961703	+	0	0	0
1	9966849	9968503	MACS_peak_477	231.06	AT1G28390	protein_coding_gene	Protein kinase superfamily protein	---	Protein kinase superfamily protein; FUNCTIONS IN: protein serine/threonine kinase activity, protein kinase activity, kinase activity, ATP binding; INVOLVED IN: protein amino acid phosphorylation; LOCATED IN: cellular_component unknown; EXPRESSED IN: 20 plant structures; EXPRESSED DURING: 13 growth stages; CONTAINS InterPro DOMAIN/s: Protein kinase, ATP binding site (InterPro:IPR017441), Protein k…	0	1	TAIR10	9966186	9968301	-	0	0	0
1	9972343	9973947	MACS_peak_478	440.4	AT1G28400	protein_coding_gene	---	---	unknown protein; FUNCTIONS IN: molecular_function unknown; INVOLVED IN: biological_process unknown; LOCATED IN: endomembrane system; EXPRESSED IN: 22 plant structures; EXPRESSED DURING: 13 growth stages; BEST Arabidopsis thaliana protein match is: unknown protein (TAIR:AT2G33850.1); Has 45374 Blast hits to 18870 proteins in 668 species: Archae - 72; Bacteria - 1460; Metazoa - 1191; Fungi - 1038; …	0	1	TAIR10	9972384	9973793	-	0	1	0
1	9992541	9995409	MACS_peak_479	362.16	AT1G28430	protein_coding_gene	cytochrome P450, family 705, subfamily A, polypeptide 24	member of CYP705A	cytochrome P450, family 705, subfamily A, polypeptide 24 (CYP705A24); FUNCTIONS IN: electron carrier activity, monooxygenase activity, iron ion binding, oxygen binding, heme binding; INVOLVED IN: oxidation reduction; LOCATED IN: endomembrane system; EXPRESSED IN: petal, leaf whorl, sepal, flower; EXPRESSED DURING: 4 anthesis, petal differentiation and expansion stage; CONTAINS InterPro DOMAIN/s: …	0	1	TAIR10	9992986	9994642	-	0	0	0
1	10003125	10004639	MACS_peak_480	151.47	AT1G28450	protein_coding_gene	AGAMOUS-like 58	---	AGAMOUS-like 58 (AGL58); FUNCTIONS IN: DNA binding, sequence-specific DNA binding transcription factor activity; INVOLVED IN: regulation of transcription, DNA-dependent; LOCATED IN: nucleus; EXPRESSED IN: antipodal cell, embryo, endosperm; CONTAINS InterPro DOMAIN/s: Transcription factor, MADS-box (InterPro:IPR002100); BEST Arabidopsis thaliana protein match is: AGAMOUS-like 59 (TAIR:AT1G28460.1)…	0	1	TAIR10	10003966	10004523	+	0	1	0
1	10010000	10011967	MACS_peak_481	119.57	AT1G28470	protein_coding_gene	NAC domain containing protein 10	---	NAC domain containing protein 10 (NAC010); CONTAINS InterPro DOMAIN/s: No apical meristem (NAM) protein (InterPro:IPR003441); BEST Arabidopsis thaliana protein match is: NAC domain containing protein 73 (TAIR:AT4G28500.1); Has 2334 Blast hits to 2329 proteins in 68 species: Archae - 0; Bacteria - 0; Metazoa - 0; Fungi - 0; Plants - 2334; Viruses - 0; Other Eukaryotes - 0 (source: NCBI BLink).	0	1	TAIR10	10010181	10012198	+	0	0	0
1	10018380	10021606	MACS_peak_482	384.95	AT1G28500	protein_coding_gene	Protein of unknown function (DUF626)	---	Protein of unknown function (DUF626); CONTAINS InterPro DOMAIN/s: Protein of unknown function DUF626, Arabidopsis thaliana (InterPro:IPR006462); BEST Arabidopsis thaliana protein match is: Protein of unknown function (DUF626) (TAIR:AT1G27860.1); Has 198 Blast hits to 197 proteins in 2 species: Archae - 0; Bacteria - 0; Metazoa - 0; Fungi - 0; Plants - 198; Viruses - 0; Other Eukaryotes - 0 (sourc…	0	1	TAIR10	10018691	10020350	+	1	1	1
1	10047487	10049883	MACS_peak_483	377.98	AT1G28590	protein_coding_gene	GDSL-like Lipase/Acylhydrolase superfamily protein	---	GDSL-like Lipase/Acylhydrolase superfamily protein; FUNCTIONS IN: hydrolase activity, acting on ester bonds, carboxylesterase activity; INVOLVED IN: lipid metabolic process; LOCATED IN: endomembrane system; CONTAINS InterPro DOMAIN/s: Lipase, GDSL (InterPro:IPR001087); BEST Arabidopsis thaliana protein match is: GDSL-like Lipase/Acylhydrolase superfamily protein (TAIR:AT2G27360.1); Has 3435 Blast…	0	1	TAIR10	10047276	10049300	-	0	1	0
1	10058923	10060051	MACS_peak_484	80.69	AT1G28630	protein_coding_gene	---	---	unknown protein; Has 647 Blast hits to 524 proteins in 85 species: Archae - 0; Bacteria - 6; Metazoa - 100; Fungi - 44; Plants - 83; Viruses - 0; Other Eukaryotes - 414 (source: NCBI BLink).	0	1	TAIR10	10058456	10063460	-	0	0	0
1	10067309	10070520	MACS_peak_485	215.06	AT1G28650	protein_coding_gene	GDSL-like Lipase/Acylhydrolase superfamily protein	---	GDSL-like Lipase/Acylhydrolase superfamily protein; FUNCTIONS IN: hydrolase activity, acting on ester bonds, carboxylesterase activity; INVOLVED IN: lipid metabolic process; LOCATED IN: endomembrane system; EXPRESSED IN: stem; CONTAINS InterPro DOMAIN/s: Lipase, GDSL (InterPro:IPR001087); BEST Arabidopsis thaliana protein match is: GDSL-like Lipase/Acylhydrolase superfamily protein (TAIR:AT1G2867…	0	1	TAIR10	10069365	10071082	-	0	0	0
1	10081635	10085594	MACS_peak_486	662.4	AT1G28700	protein_coding_gene	Nucleotide-diphospho-sugar transferase family protein	---	Nucleotide-diphospho-sugar transferase family protein; FUNCTIONS IN: molecular_function unknown; INVOLVED IN: biological_process unknown; LOCATED IN: endomembrane system; CONTAINS InterPro DOMAIN/s: Nucleotide-diphospho-sugar transferase, predicted (InterPro:IPR005069); BEST Arabidopsis thaliana protein match is: Nucleotide-diphospho-sugar transferase family protein (TAIR:AT1G28710.3); Has 309 Bl…	0	1	TAIR10	10083500	10085030	-	1	2	0
1	10112015	10116269	MACS_peak_487	269.64	AT1G29000	protein_coding_gene	Heavy metal transport/detoxification superfamily protein	---	Heavy metal transport/detoxification superfamily protein ; FUNCTIONS IN: metal ion binding; INVOLVED IN: metal ion transport; CONTAINS InterPro DOMAIN/s: Heavy metal transport/detoxification protein (InterPro:IPR006121); BEST Arabidopsis thaliana protein match is: Heavy metal transport/detoxification superfamily protein (TAIR:AT5G50740.1); Has 54430 Blast hits to 26412 proteins in 1651 species: A…	0	1	TAIR10	10113018	10114340	+	1	0	0
1	10138631	10139432	MACS_peak_488	105.95	AT1G29050	protein_coding_gene	TRICHOME BIREFRINGENCE-LIKE 38	Encodes a member of the TBL (TRICHOME BIREFRINGENCE-LIKE) gene family containing a plant-specific DUF231 (domain of unknown function) domain. TBL gene family has 46 members, two of which (TBR/AT5G06700 and TBL3/AT5G01360) have been shown to be involved in the synthesis and deposition of secondary wall cellulose, presumably by influencing the esterification state of pectic polymers. A nomenclature…	TRICHOME BIREFRINGENCE-LIKE 38 (TBL38); INVOLVED IN: biological_process unknown; LOCATED IN: endomembrane system; EXPRESSED IN: 22 plant structures; EXPRESSED DURING: 12 growth stages; CONTAINS InterPro DOMAIN/s: Protein of unknown function DUF231, plant (InterPro:IPR004253); BEST Arabidopsis thaliana protein match is: TRICHOME BIREFRINGENCE-LIKE 37 (TAIR:AT2G34070.1); Has 1347 Blast hits to 1329…	0	1	TAIR10	10136230	10139208	-	0	1	0
1	10157151	10159073	MACS_peak_489	628.43	AT1G29080	protein_coding_gene	Papain family cysteine protease	---	Papain family cysteine protease; FUNCTIONS IN: cysteine-type endopeptidase activity, cysteine-type peptidase activity; INVOLVED IN: proteolysis; LOCATED IN: endomembrane system; CONTAINS InterPro DOMAIN/s: Peptidase C1A, papain (InterPro:IPR013128), Proteinase inhibitor I29, cathepsin propeptide (InterPro:IPR013201), Peptidase C1A, papain C-terminal (InterPro:IPR000668), Peptidase, cysteine pepti…	0	1	TAIR10	10157494	10158674	-	1	0	0
1	10162506	10164877	MACS_peak_490	221.97	AT1G29090	protein_coding_gene	Cysteine proteinases superfamily protein	---	Cysteine proteinases superfamily protein; FUNCTIONS IN: cysteine-type endopeptidase activity, cysteine-type peptidase activity; INVOLVED IN: proteolysis; LOCATED IN: endomembrane system; EXPRESSED IN: sperm cell; CONTAINS InterPro DOMAIN/s: Peptidase C1A, papain (InterPro:IPR013128), Proteinase inhibitor I29, cathepsin propeptide (InterPro:IPR013201), Peptidase C1A, papain C-terminal (InterPro:IP…	0	1	TAIR10	10162983	10164452	-	0	0	0
1	10166859	10169907	MACS_peak_491	56.05	AT1G29100	protein_coding_gene	Heavy metal transport/detoxification superfamily protein	---	Heavy metal transport/detoxification superfamily protein ; FUNCTIONS IN: copper ion binding, metal ion binding; INVOLVED IN: copper ion transport, metal ion transport; CONTAINS InterPro DOMAIN/s: Heavy metal transport/detoxification protein (InterPro:IPR006121); BEST Arabidopsis thaliana protein match is: Heavy metal transport/detoxification superfamily protein (TAIR:AT1G06330.1); Has 899 Blast h…	0	1	TAIR10	10169084	10169619	+	1	0	0
1	10170278	10173507	MACS_peak_492	229.87	AT1G29110	protein_coding_gene	Cysteine proteinases superfamily protein	---	Cysteine proteinases superfamily protein; FUNCTIONS IN: cysteine-type endopeptidase activity, cysteine-type peptidase activity; INVOLVED IN: proteolysis; LOCATED IN: endomembrane system; CONTAINS InterPro DOMAIN/s: Proteinase inhibitor I29, cathepsin propeptide (InterPro:IPR013201), Peptidase C1A, papain (InterPro:IPR013128), Peptidase C1A, papain C-terminal (InterPro:IPR000668), Peptidase, cyste…	0	1	TAIR10	10171683	10173071	+	1	1	0
1	10179085	10180076	MACS_peak_493	126.81	AT1G29140	protein_coding_gene	Pollen Ole e 1 allergen and extensin family protein	---	Pollen Ole e 1 allergen and extensin family protein; FUNCTIONS IN: molecular_function unknown; INVOLVED IN: biological_process unknown; LOCATED IN: endomembrane system; EXPRESSED IN: 9 plant structures; EXPRESSED DURING: L mature pollen stage, M germinated pollen stage, 4 anthesis, C globular stage, petal differentiation and expansion stage; CONTAINS InterPro DOMAIN/s: Pollen Ole e 1 allergen/ext…	0	1	TAIR10	10178902	10180019	+	0	0	0
1	10183416	10184589	MACS_peak_494	82.24	AT1G29160	protein_coding_gene	Dof-type zinc finger DNA-binding family protein	---	Dof-type zinc finger DNA-binding family protein; CONTAINS InterPro DOMAIN/s: Zinc finger, Dof-type (InterPro:IPR003851); BEST Arabidopsis thaliana protein match is: Dof-type zinc finger DNA-binding family protein (TAIR:AT2G34140.1); Has 1076 Blast hits to 1071 proteins in 56 species: Archae - 0; Bacteria - 0; Metazoa - 0; Fungi - 0; Plants - 1071; Viruses - 0; Other Eukaryotes - 5 (source: NCBI B…	0	1	TAIR10	10183797	10184324	-	0	1	0
1	10202391	10203717	MACS_peak_495	129.32	AT1G29195	protein_coding_gene	---	---	unknown protein; FUNCTIONS IN: molecular_function unknown; INVOLVED IN: biological_process unknown; LOCATED IN: chloroplast; EXPRESSED IN: 13 plant structures; EXPRESSED DURING: 4 anthesis, C globular stage, 4 leaf senescence stage, petal differentiation and expansion stage; BEST Arabidopsis thaliana protein match is: unknown protein (TAIR:AT2G30230.1); Has 180 Blast hits to 180 proteins in 14 sp…	0	1	TAIR10	10202536	10203396	-	0	0	0
1	10234855	10237737	MACS_peak_496	415.42	AT1G29280	protein_coding_gene	WRKY DNA-binding protein 65	member of WRKY Transcription Factor; Group II-e	WRKY DNA-binding protein 65 (WRKY65); FUNCTIONS IN: sequence-specific DNA binding transcription factor activity; INVOLVED IN: regulation of transcription, DNA-dependent, regulation of transcription; EXPRESSED IN: 8 plant structures; EXPRESSED DURING: LP.06 six leaves visible, LP.04 four leaves visible, 4 anthesis; CONTAINS InterPro DOMAIN/s: DNA-binding WRKY (InterPro:IPR003657); BEST Arabidopsis…	0	1	TAIR10	10236367	10237467	+	0	2	1
1	10365666	10366628	MACS_peak_497	56.05	---	---	---	---	---	---	---	---	---	---	---	0	0	0
1	10370729	10371667	MACS_peak_498	88.09	AT1G29660	protein_coding_gene	GDSL-like Lipase/Acylhydrolase superfamily protein	---	GDSL-like Lipase/Acylhydrolase superfamily protein; FUNCTIONS IN: hydrolase activity, acting on ester bonds, carboxylesterase activity; INVOLVED IN: lipid metabolic process; LOCATED IN: apoplast, nucleus; EXPRESSED IN: 19 plant structures; EXPRESSED DURING: 10 growth stages; CONTAINS InterPro DOMAIN/s: Lipase, GDSL (InterPro:IPR001087); BEST Arabidopsis thaliana protein match is: GDSL-like Lipase…	-172	1	TAIR10	10371839	10373766	+	0	0	0
1	10453084	10456097	MACS_peak_499	136.49	AT1G29860	protein_coding_gene	WRKY DNA-binding protein 71	member of WRKY Transcription Factor; Group II-c	WRKY DNA-binding protein 71 (WRKY71); FUNCTIONS IN: sequence-specific DNA binding transcription factor activity; INVOLVED IN: regulation of transcription, DNA-dependent, regulation of transcription; EXPRESSED IN: stem; CONTAINS InterPro DOMAIN/s: DNA-binding WRKY (InterPro:IPR003657), Transcription factor, WRKY group IIc (InterPro:IPR017396); BEST Arabidopsis thaliana protein match is: WRKY DNA-b…	0	1	TAIR10	10454482	10455785	+	0	0	0
1	10456749	10459108	MACS_peak_500	87.97	AT1G29870	protein_coding_gene	tRNA synthetase class II (G, H, P and S) family protein	---	tRNA synthetase class II (G, H, P and S) family protein; FUNCTIONS IN: glycine-tRNA ligase activity, nucleotide binding, aminoacyl-tRNA ligase activity, ATP binding; INVOLVED IN: translation, tRNA aminoacylation for protein translation, glycyl-tRNA aminoacylation; LOCATED IN: cytoplasm; CONTAINS InterPro DOMAIN/s: Aminoacyl-tRNA synthetase, class II (G/ H/ P/ S), conserved domain (InterPro:IPR002…	0	1	TAIR10	10456902	10458782	-	1	1	0
1	10517071	10518654	MACS_peak_501	435.74	---	---	---	---	---	---	---	---	---	---	---	1	1	0
1	10548490	10550836	MACS_peak_502	104.98	---	---	---	---	---	---	---	---	---	---	---	0	0	0
1	10550852	10553151	MACS_peak_503	69.61	AT1G30080	protein_coding_gene	Glycosyl hydrolase superfamily protein	---	Glycosyl hydrolase superfamily protein; FUNCTIONS IN: cation binding, hydrolase activity, hydrolyzing O-glycosyl compounds, catalytic activity; INVOLVED IN: carbohydrate metabolic process; LOCATED IN: endomembrane system; EXPRESSED IN: 9 plant structures; EXPRESSED DURING: 4 anthesis, F mature embryo stage, petal differentiation and expansion stage, E expanded cotyledon stage, D bilateral stage; …	0	1	TAIR10	10550947	10553215	-	0	1	0
1	10562499	10564548	MACS_peak_504	96.82	---	---	---	---	---	---	---	---	---	---	---	0	1	0
1	10565643	10568195	MACS_peak_505	61.69	---	---	---	---	---	---	---	---	---	---	---	0	0	0
1	10569759	10572765	MACS_peak_506	165.46	AT1G30100	protein_coding_gene	nine-cis-epoxycarotenoid dioxygenase 5	Encodes 9-cis-epoxycarotenoid dioxygenase, a key enzyme in the biosynthesis of abscisic acid. The expression of this gene increases during the first 6h of imbibition.	nine-cis-epoxycarotenoid dioxygenase 5 (NCED5); CONTAINS InterPro DOMAIN/s: Carotenoid oxygenase (InterPro:IPR004294); BEST Arabidopsis thaliana protein match is: nine-cis-epoxycarotenoid dioxygenase 2 (TAIR:AT4G18350.1); Has 2882 Blast hits to 2845 proteins in 494 species: Archae - 16; Bacteria - 802; Metazoa - 232; Fungi - 202; Plants - 893; Viruses - 0; Other Eukaryotes - 737 (source: NCBI BLi…	0	1	TAIR10	10571340	10573365	+	0	1	1
1	10575955	10579357	MACS_peak_507	245.18	---	---	---	---	---	---	---	---	---	---	---	0	0	0
1	10600373	10604471	MACS_peak_508	55.3	---	---	---	---	---	---	---	---	---	---	---	3	1	0
1	10610354	10615271	MACS_peak_509	196.98	AT1G30170	protein_coding_gene	Protein of unknown function (DUF295)	---	Protein of unknown function (DUF295); CONTAINS InterPro DOMAIN/s: Protein of unknown function DUF295 (InterPro:IPR005174); BEST Arabidopsis thaliana protein match is: Protein of unknown function (DUF295) (TAIR:AT1G30160.2); Has 234 Blast hits to 226 proteins in 7 species: Archae - 0; Bacteria - 0; Metazoa - 0; Fungi - 0; Plants - 234; Viruses - 0; Other Eukaryotes - 0 (source: NCBI BLink).	-737	1	TAIR10	10607888	10609618	-	3	0	0
1	10646857	10648541	MACS_peak_510	235.79	AT1G30250	protein_coding_gene	---	---	unknown protein; Has 5 Blast hits to 5 proteins in 2 species: Archae - 0; Bacteria - 0; Metazoa - 0; Fungi - 0; Plants - 5; Viruses - 0; Other Eukaryotes - 0 (source: NCBI BLink).	0	1	TAIR10	10646987	10647511	-	0	1	0
1	10683340	10685000	MACS_peak_511	466.73	---	---	---	---	---	---	---	---	---	---	---	0	2	0
1	10693399	10695113	MACS_peak_512	309.1	---	---	---	---	---	---	---	---	---	---	---	0	1	1
1	10709904	10712225	MACS_peak_513	827.66	AT1G30350	protein_coding_gene	Pectin lyase-like superfamily protein	---	Pectin lyase-like superfamily protein; FUNCTIONS IN: lyase activity, pectate lyase activity; INVOLVED IN: biological_process unknown; LOCATED IN: endomembrane system; EXPRESSED IN: petal, leaf whorl, sepal, flower; EXPRESSED DURING: 4 anthesis, petal differentiation and expansion stage; CONTAINS InterPro DOMAIN/s: Pectin lyase fold/virulence factor (InterPro:IPR011050), AmbAllergen (InterPro:IPR0…	0	1	TAIR10	10710079	10711664	-	0	1	1
1	10793525	10794782	MACS_peak_514	248.56	---	---	---	---	---	---	---	---	---	---	---	0	0	0
1	10867911	10871390	MACS_peak_515	282.53	AT1G30650	protein_coding_gene	WRKY DNA-binding protein 14	member of WRKY Transcription Factor; Group II-e	WRKY DNA-binding protein 14 (WRKY14); CONTAINS InterPro DOMAIN/s: DNA-binding WRKY (InterPro:IPR003657), Transcription factor, WRKY group Iie (InterPro:IPR017412); BEST Arabidopsis thaliana protein match is: WRKY DNA-binding protein 35 (TAIR:AT2G34830.1); Has 3350 Blast hits to 2895 proteins in 207 species: Archae - 0; Bacteria - 0; Metazoa - 14; Fungi - 12; Plants - 3273; Viruses - 0; Other Euka…	0	1	TAIR10	10868303	10871297	+	1	1	1
1	10892452	10893618	MACS_peak_516	154.45	AT1G30700	protein_coding_gene	FAD-binding Berberine family protein	---	FAD-binding Berberine family protein; FUNCTIONS IN: electron carrier activity, oxidoreductase activity, FAD binding, catalytic activity; LOCATED IN: endomembrane system; EXPRESSED IN: stem, hypocotyl, root, stamen; EXPRESSED DURING: 4 anthesis; CONTAINS InterPro DOMAIN/s: FAD-binding, type 2 (InterPro:IPR016166), Berberine/berberine-like (InterPro:IPR012951), FAD linked oxidase, N-terminal (Inter…	0	1	TAIR10	10892570	10894572	+	0	1	1
1	10894930	10896817	MACS_peak_517	77.38	AT1G30710	protein_coding_gene	FAD-binding Berberine family protein	---	FAD-binding Berberine family protein; FUNCTIONS IN: electron carrier activity, oxidoreductase activity, FAD binding, catalytic activity; LOCATED IN: endomembrane system; EXPRESSED IN: 6 plant structures; EXPRESSED DURING: L mature pollen stage, M germinated pollen stage, 4 anthesis, C globular stage; CONTAINS InterPro DOMAIN/s: FAD-binding, type 2 (InterPro:IPR016166), Berberine/berberine-like (I…	0	1	TAIR10	10895280	10897109	+	0	3	1
1	10900441	10902573	MACS_peak_518	140.62	AT1G30730	protein_coding_gene	FAD-binding Berberine family protein	---	FAD-binding Berberine family protein; FUNCTIONS IN: electron carrier activity, oxidoreductase activity, FAD binding, catalytic activity; LOCATED IN: endomembrane system; CONTAINS InterPro DOMAIN/s: FAD-binding, type 2 (InterPro:IPR016166), Berberine/berberine-like (InterPro:IPR012951), FAD linked oxidase, N-terminal (InterPro:IPR006094); BEST Arabidopsis thaliana protein match is: FAD-binding Ber…	0	1	TAIR10	10900854	10902534	+	0	1	0
1	10917896	10920728	MACS_peak_519	198.59	AT1G30760	protein_coding_gene	FAD-binding Berberine family protein	---	FAD-binding Berberine family protein; FUNCTIONS IN: electron carrier activity, oxidoreductase activity, FAD binding, catalytic activity; LOCATED IN: endomembrane system; EXPRESSED IN: inflorescence meristem, root, flower, pedicel; EXPRESSED DURING: 4 anthesis, petal differentiation and expansion stage; CONTAINS InterPro DOMAIN/s: FAD-binding, type 2 (InterPro:IPR016166), Berberine/berberine-like …	0	1	TAIR10	10918278	10920677	+	2	0	0
1	10925787	10926880	MACS_peak_520	59.5	AT1G30780	protein_coding_gene	F-box associated ubiquitination effector family protein	---	F-box associated ubiquitination effector family protein; CONTAINS InterPro DOMAIN/s: F-box domain, cyclin-like (InterPro:IPR001810), F-box domain, Skp2-like (InterPro:IPR022364), F-box associated domain, type 3 (InterPro:IPR013187), F-box associated interaction domain (InterPro:IPR017451); BEST Arabidopsis thaliana protein match is: F-box and associated interaction domains-containing protein (TAI…	0	1	TAIR10	10923919	10926561	-	0	1	0
1	10927057	10929096	MACS_peak_521	142.81	AT1G30780	protein_coding_gene	F-box associated ubiquitination effector family protein	---	F-box associated ubiquitination effector family protein; CONTAINS InterPro DOMAIN/s: F-box domain, cyclin-like (InterPro:IPR001810), F-box domain, Skp2-like (InterPro:IPR022364), F-box associated domain, type 3 (InterPro:IPR013187), F-box associated interaction domain (InterPro:IPR017451); BEST Arabidopsis thaliana protein match is: F-box and associated interaction domains-containing protein (TAI…	-497	1	TAIR10	10923919	10926561	-	0	0	0
1	10931722	10934787	MACS_peak_522	90.76	AT1G30790	protein_coding_gene	F-box and associated interaction domains-containing protein	---	F-box and associated interaction domains-containing protein; CONTAINS InterPro DOMAIN/s: F-box domain, cyclin-like (InterPro:IPR001810), F-box domain, Skp2-like (InterPro:IPR022364), F-box associated domain, type 3 (InterPro:IPR013187), F-box associated interaction domain (InterPro:IPR017451); BEST Arabidopsis thaliana protein match is: F-box and associated interaction domains-containing protein …	0	1	TAIR10	10932713	10934066	+	1	0	0
1	10935081	10937033	MACS_peak_523	79.33	AT1G30810	protein_coding_gene	Transcription factor jumonji (jmj) family protein / zinc finger (C5HC2 type) family protein	JMJ18 encodes a novel JmjC domain- containing histone H3K4 demethylase.	Transcription factor jumonji (jmj) family protein / zinc finger (C5HC2 type) family protein; FUNCTIONS IN: sequence-specific DNA binding transcription factor activity; INVOLVED IN: regulation of transcription; LOCATED IN: nucleus; EXPRESSED IN: 19 plant structures; EXPRESSED DURING: 8 growth stages; CONTAINS InterPro DOMAIN/s: Transcription factor jumonji/aspartyl beta-hydroxylase (InterPro:IPR00…	0	1	TAIR10	10936765	10942292	-	1	1	0
1	10942962	10943915	MACS_peak_524	86.34	AT1G30814	protein_coding_gene	---	---	unknown protein; Has 35333 Blast hits to 34131 proteins in 2444 species: Archae - 798; Bacteria - 22429; Metazoa - 974; Fungi - 991; Plants - 531; Viruses - 0; Other Eukaryotes - 9610 (source: NCBI BLink).	0	1	TAIR10	10942648	10944727	-	0	0	0
1	10970348	10971735	MACS_peak_525	100.83	---	---	---	---	---	---	---	---	---	---	---	2	0	0
1	10974138	10975920	MACS_peak_526	206.58	AT1G30840	protein_coding_gene	purine permease 4	Member of a family of proteins related to PUP1, a purine transporter. May be involved in the transport of purine and purine derivatives such as cytokinins, across the plasma membrane.	purine permease 4 (PUP4); CONTAINS InterPro DOMAIN/s: Protein of unknown function DUF6, transmembrane (InterPro:IPR000620), Protein of unknown function DUF250 (InterPro:IPR004853); BEST Arabidopsis thaliana protein match is: purine permease 1 (TAIR:AT1G28230.1); Has 652 Blast hits to 644 proteins in 132 species: Archae - 10; Bacteria - 158; Metazoa - 37; Fungi - 9; Plants - 358; Viruses - 0; Othe…	0	1	TAIR10	10974445	10976298	+	1	1	1
1	11003010	11005845	MACS_peak_527	165.45	AT1G30920	protein_coding_gene	F-box family protein	---	F-box family protein; CONTAINS InterPro DOMAIN/s: F-box domain, cyclin-like (InterPro:IPR001810), F-box domain, Skp2-like (InterPro:IPR022364), F-box associated domain, type 3 (InterPro:IPR013187), F-box associated interaction domain (InterPro:IPR017451); BEST Arabidopsis thaliana protein match is: F-box and associated interaction domains-containing protein (TAIR:AT5G42430.1); Has 1576 Blast hits…	0	1	TAIR10	11004242	11005444	-	0	1	0
1	11013186	11016342	MACS_peak_528	123.48	AT1G30930	protein_coding_gene	F-box family protein	---	F-box family protein; CONTAINS InterPro DOMAIN/s: F-box domain, cyclin-like (InterPro:IPR001810), F-box domain, Skp2-like (InterPro:IPR022364), F-box associated domain, type 3 (InterPro:IPR013187), F-box associated interaction domain (InterPro:IPR017451); BEST Arabidopsis thaliana protein match is: F-box and associated interaction domains-containing protein (TAIR:AT1G33020.1); Has 1151 Blast hits…	0	1	TAIR10	11014783	11015913	-	1	1	0
1	11021623	11023793	MACS_peak_529	111.93	---	---	---	---	---	---	---	---	---	---	---	0	2	0
1	11029270	11032210	MACS_peak_530	70.87	---	---	---	---	---	---	---	---	---	---	---	0	1	0
1	11035668	11037540	MACS_peak_531	260.31	AT1G30950	protein_coding_gene	F-box family protein	Required for the proper identity of the floral meristem. Involved in establishing the whorled pattern of floral organs, in the control of specification of the floral meristem, and in the activation of APETALA3 and PISTILLATA. UFO is found at the AP3 promoter in a LFY-dependent manner, suggesting that it works with LFY to regulate AP3 expression. UFO may also promote the ubiquitylation of LFY.	UNUSUAL FLORAL ORGANS (UFO); CONTAINS InterPro DOMAIN/s: F-box domain, cyclin-like (InterPro:IPR001810), F-box domain, Skp2-like (InterPro:IPR022364); BEST Arabidopsis thaliana protein match is: Galactose oxidase/kelch repeat superfamily protein (TAIR:AT5G15710.1); Has 431 Blast hits to 429 proteins in 44 species: Archae - 0; Bacteria - 0; Metazoa - 0; Fungi - 0; Plants - 431; Viruses - 0; Other …	0	1	TAIR10	11036180	11037508	+	0	1	0
1	11051793	11054731	MACS_peak_532	441.31	AT1G31010	protein_coding_gene	organellar single-stranded DNA binding protein 4	---	organellar single-stranded DNA binding protein 4 (OSB4); FUNCTIONS IN: single-stranded DNA binding; INVOLVED IN: biological_process unknown; LOCATED IN: chloroplast; EXPRESSED IN: 21 plant structures; EXPRESSED DURING: 12 growth stages; CONTAINS InterPro DOMAIN/s: Nucleic acid-binding, OB-fold-like (InterPro:IPR016027), Nucleic acid-binding, OB-fold (InterPro:IPR012340), Primosome PriB/single-str…	0	1	TAIR10	11054731	11056921	-	0	0	0
1	11075361	11081560	MACS_peak_533	70.15	AT1G31050	protein_coding_gene	basic helix-loop-helix (bHLH) DNA-binding superfamily protein	---	basic helix-loop-helix (bHLH) DNA-binding superfamily protein; FUNCTIONS IN: sequence-specific DNA binding transcription factor activity; INVOLVED IN: regulation of transcription; LOCATED IN: nucleus; EXPRESSED IN: sperm cell, hypocotyl, root; CONTAINS InterPro DOMAIN/s: Helix-loop-helix DNA-binding (InterPro:IPR011598); BEST Arabidopsis thaliana protein match is: basic helix-loop-helix (bHLH) DN…	0	1	TAIR10	11075627	11079240	-	1	0	0
1	11081649	11084322	MACS_peak_534	93.6	AT1G31070	protein_coding_gene	N-acetylglucosamine-1-phosphate uridylyltransferase 1	Encodes a protein that functions as an N-acetylglucosamine-1-phosphate uridylyltransferase that catalyzes the formation of UDP-N-acetylglucosamine (UDP-GlcNAc). This is an essential precursor for glycolipid and glycoprotein synthesis and is also used for regulatory protein modification in signaling pathways. The enzyme can also catalyze the reverse reaction using both UDP-GlcNAc and the less comm…	N-acetylglucosamine-1-phosphate uridylyltransferase 1 (GlcNAc1pUT1); FUNCTIONS IN: UDP-N-acetylglucosamine diphosphorylase activity, UDP-N-acetylgalactosamine diphosphorylase activity; INVOLVED IN: UDP-N-acetylglucosamine metabolic process, UDP-N-acetylgalactosamine metabolic process; LOCATED IN: plasma membrane; EXPRESSED IN: 25 plant structures; EXPRESSED DURING: 13 growth stages; CONTAINS Inte…	-537	1	TAIR10	11084859	11088563	+	1	0	0
1	11094280	11095244	MACS_peak_535	155.57	AT1G31090	protein_coding_gene	F-box family protein	---	F-box family protein; CONTAINS InterPro DOMAIN/s: F-box domain, cyclin-like (InterPro:IPR001810), F-box domain, Skp2-like (InterPro:IPR022364), F-box associated domain, type 3 (InterPro:IPR013187), F-box associated interaction domain (InterPro:IPR017451); BEST Arabidopsis thaliana protein match is: F-box family protein (TAIR:AT1G31080.1); Has 1141 Blast hits to 897 proteins in 22 species: Archae …	0	1	TAIR10	11094407	11095649	+	1	0	0
1	11128712	11131982	MACS_peak_536	256.52	AT1G31163	protein_coding_gene	F-box associated ubiquitination effector family protein	---	F-box associated ubiquitination effector family protein; FUNCTIONS IN: molecular_function unknown; INVOLVED IN: biological_process unknown; LOCATED IN: endomembrane system; CONTAINS InterPro DOMAIN/s: F-box associated domain, type 3 (InterPro:IPR013187); BEST Arabidopsis thaliana protein match is: F-box family protein (TAIR:AT1G30930.1); Has 145 Blast hits to 132 proteins in 2 species: Archae - 0…	0	1	TAIR10	11128732	11130239	-	0	0	0
1	11166378	11167239	MACS_peak_537	76.93	AT1G31250	protein_coding_gene	proline-rich family protein	---	proline-rich family protein; FUNCTIONS IN: molecular_function unknown; INVOLVED IN: biological_process unknown; LOCATED IN: endomembrane system; Has 24580 Blast hits to 9370 proteins in 816 species: Archae - 67; Bacteria - 3086; Metazoa - 5006; Fungi - 2268; Plants - 4246; Viruses - 1015; Other Eukaryotes - 8892 (source: NCBI BLink).	0	1	TAIR10	11166557	11167547	-	0	0	0
1	11168057	11170017	MACS_peak_538	229.73	AT1G31250	protein_coding_gene	proline-rich family protein	---	proline-rich family protein; FUNCTIONS IN: molecular_function unknown; INVOLVED IN: biological_process unknown; LOCATED IN: endomembrane system; Has 24580 Blast hits to 9370 proteins in 816 species: Archae - 67; Bacteria - 3086; Metazoa - 5006; Fungi - 2268; Plants - 4246; Viruses - 1015; Other Eukaryotes - 8892 (source: NCBI BLink).	-511	1	TAIR10	11166557	11167547	-	1	0	0
1	11175347	11177552	MACS_peak_539	361.07	AT1G31260	protein_coding_gene	zinc transporter 10 precursor	member of Fe(II) transporter isolog family	zinc transporter 10 precursor (ZIP10); FUNCTIONS IN: cation transmembrane transporter activity, metal ion transmembrane transporter activity; INVOLVED IN: cation transport; LOCATED IN: endomembrane system, integral to membrane, membrane; CONTAINS InterPro DOMAIN/s: Zinc/iron permease, fungal/plant (InterPro:IPR004698), Zinc/iron permease (InterPro:IPR003689); BEST Arabidopsis thaliana protein mat…	0	1	TAIR10	11175559	11177362	-	0	0	0
1	11188385	11189353	MACS_peak_540	83.99	AT1G31290	protein_coding_gene	ARGONAUTE 3	---	ARGONAUTE 3 (AGO3); FUNCTIONS IN: nucleic acid binding; INVOLVED IN: biological_process unknown; LOCATED IN: cellular_component unknown; EXPRESSED IN: 11 plant structures; EXPRESSED DURING: LP.06 six leaves visible, LP.04 four leaves visible, 4 anthesis, C globular stage, petal differentiation and expansion stage; CONTAINS InterPro DOMAIN/s: Domain of unknown function DUF1785 (InterPro:IPR014811)…	0	1	TAIR10	11188293	11192317	+	0	1	0
1	11198233	11200435	MACS_peak_541	96.01	AT1G31310	protein_coding_gene	hydroxyproline-rich glycoprotein family protein	---	hydroxyproline-rich glycoprotein family protein; CONTAINS InterPro DOMAIN/s: MYB-like (InterPro:IPR017877); BEST Arabidopsis thaliana protein match is: Homeodomain-like superfamily protein (TAIR:AT2G35640.1); Has 3054 Blast hits to 2678 proteins in 309 species: Archae - 8; Bacteria - 384; Metazoa - 1064; Fungi - 253; Plants - 884; Viruses - 120; Other Eukaryotes - 341 (source: NCBI BLink).	0	1	TAIR10	11198353	11200141	-	0	2	0
1	11201532	11204693	MACS_peak_542	134.62	---	---	---	---	---	---	---	---	---	---	---	0	0	0
1	11224706	11226160	MACS_peak_543	204.92	---	---	---	---	---	---	---	---	---	---	---	0	1	0
1	11277196	11280278	MACS_peak_544	187.01	AT1G31520	protein_coding_gene	---	---	unknown protein; Has 2 Blast hits to 2 proteins in 1 species: Archae - 0; Bacteria - 0; Metazoa - 0; Fungi - 0; Plants - 2; Viruses - 0; Other Eukaryotes - 0 (source: NCBI BLink).	0	1	TAIR10	11278983	11279639	-	0	0	0
1	11281106	11282910	MACS_peak_545	122.66	AT1G31530	protein_coding_gene	DNAse I-like superfamily protein	---	DNAse I-like superfamily protein; CONTAINS InterPro DOMAIN/s: Endonuclease/exonuclease/phosphatase (InterPro:IPR005135); BEST Arabidopsis thaliana protein match is: DNAse I-like superfamily protein (TAIR:AT1G31500.1); Has 994 Blast hits to 990 proteins in 191 species: Archae - 0; Bacteria - 2; Metazoa - 479; Fungi - 209; Plants - 187; Viruses - 0; Other Eukaryotes - 117 (source: NCBI BLink).	0	1	TAIR10	11281188	11282468	-	0	0	0
1	11316611	11319889	MACS_peak_546	720.35	AT1G31630	protein_coding_gene	AGAMOUS-like 86	---	AGAMOUS-like 86 (AGL86); FUNCTIONS IN: DNA binding, sequence-specific DNA binding transcription factor activity; INVOLVED IN: regulation of transcription, DNA-dependent; LOCATED IN: nucleus; EXPRESSED IN: antipodal cell, endosperm; CONTAINS InterPro DOMAIN/s: Transcription factor, MADS-box (InterPro:IPR002100); BEST Arabidopsis thaliana protein match is: AGAMOUS-like 92 (TAIR:AT1G31640.1); Has 38…	0	1	TAIR10	11318528	11319547	-	0	1	0
1	11335599	11339679	MACS_peak_547	220.89	AT1G31670	protein_coding_gene	Copper amine oxidase family protein	---	Copper amine oxidase family protein; FUNCTIONS IN: quinone binding, primary amine oxidase activity, copper ion binding; INVOLVED IN: oxidation reduction, amine metabolic process; LOCATED IN: endomembrane system; CONTAINS InterPro DOMAIN/s: Copper amine oxidase, N-terminal (InterPro:IPR016182), Copper amine oxidase, N2-terminal (InterPro:IPR015800), Copper amine oxidase, N2/N3-terminal (InterPro:I…	0	1	TAIR10	11337558	11341889	+	1	1	1
1	11343738	11346123	MACS_peak_548	110.82	AT1G31690	protein_coding_gene	Copper amine oxidase family protein	---	Copper amine oxidase family protein; FUNCTIONS IN: quinone binding, primary amine oxidase activity, copper ion binding; INVOLVED IN: oxidation reduction, amine metabolic process; LOCATED IN: endomembrane system; EXPRESSED IN: 9 plant structures; EXPRESSED DURING: 7 growth stages; CONTAINS InterPro DOMAIN/s: Copper amine oxidase, N-terminal (InterPro:IPR016182), Copper amine oxidase, N2/N3-termina…	0	1	TAIR10	11343980	11347767	+	0	1	0
1	11349449	11351224	MACS_peak_549	211.45	AT1G31710	protein_coding_gene	Copper amine oxidase family protein	---	Copper amine oxidase family protein; FUNCTIONS IN: primary amine oxidase activity, quinone binding, copper ion binding; INVOLVED IN: oxidation reduction, amine metabolic process; LOCATED IN: endomembrane system; EXPRESSED IN: 13 plant structures; EXPRESSED DURING: 8 growth stages; CONTAINS InterPro DOMAIN/s: Copper amine oxidase, N-terminal (InterPro:IPR016182), Copper amine oxidase, N2-terminal …	0	1	TAIR10	11349840	11355486	+	0	2	0
1	11354336	11357909	MACS_peak_550	52.82	AT1G31710	protein_coding_gene	Copper amine oxidase family protein	---	Copper amine oxidase family protein; FUNCTIONS IN: primary amine oxidase activity, quinone binding, copper ion binding; INVOLVED IN: oxidation reduction, amine metabolic process; LOCATED IN: endomembrane system; EXPRESSED IN: 13 plant structures; EXPRESSED DURING: 8 growth stages; CONTAINS InterPro DOMAIN/s: Copper amine oxidase, N-terminal (InterPro:IPR016182), Copper amine oxidase, N2-terminal …	0	1	TAIR10	11349840	11355486	+	0	2	0
1	11357916	11359001	MACS_peak_551	60.9	AT1G31730	protein_coding_gene	Adaptin family protein	---	Adaptin family protein; FUNCTIONS IN: clathrin binding, binding; INVOLVED IN: intracellular protein transport, vesicle-mediated transport; LOCATED IN: membrane coat; EXPRESSED IN: 24 plant structures; EXPRESSED DURING: 13 growth stages; CONTAINS InterPro DOMAIN/s: Armadillo-like helical (InterPro:IPR011989), Adaptor protein complex AP-4, epsilon subunit (InterPro:IPR017109), Armadillo-type fold (…	-641	1	TAIR10	11359642	11364288	+	1	0	0
1	11381436	11384298	MACS_peak_552	82.5	---	---	---	---	---	---	---	---	---	---	---	0	0	0
1	11484659	11485805	MACS_peak_553	60.03	---	---	---	---	---	---	---	---	---	---	---	0	1	0
1	11487655	11489278	MACS_peak_554	195.7	AT1G31990	protein_coding_gene	---	---	unknown protein; Has 35333 Blast hits to 34131 proteins in 2444 species: Archae - 798; Bacteria - 22429; Metazoa - 974; Fungi - 991; Plants - 531; Viruses - 0; Other Eukaryotes - 9610 (source: NCBI BLink).	0	1	TAIR10	11488016	11489287	+	1	0	0
1	11498396	11502852	MACS_peak_555	152.7	---	---	---	---	---	---	---	---	---	---	---	1	0	0
1	11514036	11517012	MACS_peak_556	349.16	AT1G32030	protein_coding_gene	Domain of unknown function (DUF313)	---	FUNCTIONS IN: DNA binding; INVOLVED IN: regulation of transcription, DNA-dependent; LOCATED IN: cellular_component unknown; CONTAINS InterPro DOMAIN/s: Protein of unknown function DUF313 (InterPro:IPR005508), Transcriptional factor B3 (InterPro:IPR003340); BEST Arabidopsis thaliana protein match is: Domain of unknown function (DUF313) (TAIR:AT5G24050.1); Has 134 Blast hits to 134 proteins in 8 sp…	0	1	TAIR10	11514594	11515595	+	0	2	0
1	11527350	11528386	MACS_peak_557	718.79	AT1G32050	protein_coding_gene	SCAMP family protein	---	SCAMP family protein; FUNCTIONS IN: transmembrane transporter activity; INVOLVED IN: protein transport; LOCATED IN: mitochondrion, plasma membrane; EXPRESSED IN: 23 plant structures; EXPRESSED DURING: 14 growth stages; CONTAINS InterPro DOMAIN/s: SCAMP (InterPro:IPR007273); BEST Arabidopsis thaliana protein match is: secretory carrier 3 (TAIR:AT1G61250.1); Has 679 Blast hits to 677 proteins in 10…	-59	1	TAIR10	11528445	11531281	+	0	1	1
1	11546497	11548413	MACS_peak_558	391.95	AT1G32100	protein_coding_gene	pinoresinol reductase 1	Encodes a pinoresinol reductase involved in lignan biosynthesis. Expressed strongly in roots and less strongly in stems. Shows specificity for pinoresinol and not lariciresinol.	pinoresinol reductase 1 (PRR1); CONTAINS InterPro DOMAIN/s: NAD(P)-binding domain (InterPro:IPR016040), NmrA-like (InterPro:IPR008030); BEST Arabidopsis thaliana protein match is: pinoresinol reductase 2 (TAIR:AT4G13660.1); Has 2085 Blast hits to 2085 proteins in 479 species: Archae - 27; Bacteria - 779; Metazoa - 2; Fungi - 496; Plants - 600; Viruses - 0; Other Eukaryotes - 181 (source: NCBI BLi…	0	1	TAIR10	11546338	11547994	-	0	0	0
1	11562431	11565408	MACS_peak_559	643.78	AT1G32140	protein_coding_gene	F-box family protein	---	F-box family protein; CONTAINS InterPro DOMAIN/s: F-box domain, cyclin-like (InterPro:IPR001810), F-box domain, Skp2-like (InterPro:IPR022364), F-box associated domain, type 1 (InterPro:IPR006527), F-box associated interaction domain (InterPro:IPR017451); BEST Arabidopsis thaliana protein match is: F-box family protein (TAIR:AT3G49510.1); Has 1675 Blast hits to 964 proteins in 17 species: Archae …	0	1	TAIR10	11562742	11564833	-	1	1	0
1	11578366	11582105	MACS_peak_560	127.98	AT1G32172	other_RNA	other RNA	---	---	0	1	TAIR10	11578506	11580547	+	1	2	0
1	11625534	11630956	MACS_peak_561	59.91	AT1G32240	protein_coding_gene	Homeodomain-like superfamily protein	Encodes a member of the KANADI family of putative transcription factors. Together with KAN1, this gene appears to be involved in the development of the carpel and the outer integument of the ovule.Along with KAN1 and KAN4 appears to regulate the proper localization of PIN1 in early embryogenesis.	KANADI 2 (KAN2); CONTAINS InterPro DOMAIN/s: Homeodomain-like (InterPro:IPR009057), Myb, DNA-binding (InterPro:IPR014778), Myb-like DNA-binding domain, SHAQKYF class (InterPro:IPR006447), Homeodomain-related (InterPro:IPR012287); BEST Arabidopsis thaliana protein match is: Homeodomain-like superfamily protein (TAIR:AT4G17695.1); Has 1778 Blast hits to 1772 proteins in 95 species: Archae - 0; Bact…	0	1	TAIR10	11625700	11630626	-	0	2	1
1	11642390	11643134	MACS_peak_562	109.49	AT1G32270	protein_coding_gene	syntaxin, putative	member of SYP2 Gene Family	ATSYP24; CONTAINS InterPro DOMAIN/s: Target SNARE coiled-coil domain (InterPro:IPR000727), t-SNARE (InterPro:IPR010989), Late embryogenesis abundant protein, group 2 (InterPro:IPR004864); BEST Arabidopsis thaliana protein match is: Syntaxin/t-SNARE family protein (TAIR:AT5G46860.1); Has 1336 Blast hits to 1336 proteins in 217 species: Archae - 0; Bacteria - 9; Metazoa - 416; Fungi - 220; Plants -…	0	1	TAIR10	11642593	11644962	+	0	0	0
1	11646085	11647354	MACS_peak_563	76.23	AT1G32280	protein_coding_gene	Bifunctional inhibitor/lipid-transfer protein/seed storage 2S albumin superfamily protein	---	Bifunctional inhibitor/lipid-transfer protein/seed storage 2S albumin superfamily protein; FUNCTIONS IN: lipid binding; INVOLVED IN: lipid transport; LOCATED IN: endomembrane system; CONTAINS InterPro DOMAIN/s: Bifunctional inhibitor/plant lipid transfer protein/seed storage (InterPro:IPR016140), Plant lipid transfer protein/seed storage/trypsin-alpha amylase inhibitor (InterPro:IPR003612); BEST …	0	1	TAIR10	11646220	11646816	+	1	0	0
1	11667021	11668361	MACS_peak_564	127.57	AT1G32350	protein_coding_gene	alternative oxidase 1D	---	alternative oxidase 1D (AOX1D); FUNCTIONS IN: alternative oxidase activity; INVOLVED IN: oxidation reduction, response to cyclopentenone; LOCATED IN: mitochondrial envelope, mitochondrion; EXPRESSED IN: stem, sepal, leaf, stamen; EXPRESSED DURING: LP.04 four leaves visible, 4 anthesis, petal differentiation and expansion stage; CONTAINS InterPro DOMAIN/s: Alternative oxidase (InterPro:IPR002680);…	0	1	TAIR10	11666977	11668690	-	0	0	0
1	11701637	11703936	MACS_peak_565	314.81	AT1G32420	protein_coding_gene	F-box and associated interaction domains-containing protein	---	F-box and associated interaction domains-containing protein; FUNCTIONS IN: molecular_function unknown; INVOLVED IN: biological_process unknown; LOCATED IN: chloroplast; CONTAINS InterPro DOMAIN/s: F-box domain, cyclin-like (InterPro:IPR001810), F-box domain, Skp2-like (InterPro:IPR022364), F-box associated domain, type 3 (InterPro:IPR013187), F-box associated interaction domain (InterPro:IPR01745…	0	1	TAIR10	11701995	11702903	+	1	1	0
1	11704951	11706598	MACS_peak_566	72.18	AT1G32430	protein_coding_gene	F-box and associated interaction domains-containing protein	---	F-box and associated interaction domains-containing protein; CONTAINS InterPro DOMAIN/s: F-box domain, cyclin-like (InterPro:IPR001810), F-box domain, Skp2-like (InterPro:IPR022364), F-box associated domain, type 1 (InterPro:IPR006527), F-box associated interaction domain (InterPro:IPR017451); BEST Arabidopsis thaliana protein match is: F-box and associated interaction domains-containing protein …	0	1	TAIR10	11704932	11706325	-	2	1	0
1	11718457	11719785	MACS_peak_567	245.97	AT1G32450	protein_coding_gene	nitrate transporter 1.5	Transmembrane nitrate transporter. Involved in xylem transport of nitrate from root to shoot. Induced in response to nitrate. Not involved in nitrate uptake. expressed in root pericycle cells.	nitrate transporter 1.5 (NRT1.5); CONTAINS InterPro DOMAIN/s: Oligopeptide transporter (InterPro:IPR000109), Major facilitator superfamily, general substrate transporter (InterPro:IPR016196); BEST Arabidopsis thaliana protein match is: NITRATE TRANSPORTER 1.8 (TAIR:AT4G21680.1); Has 7755 Blast hits to 7381 proteins in 1434 species: Archae - 0; Bacteria - 3851; Metazoa - 707; Fungi - 433; Plants -…	0	1	TAIR10	11715150	11719970	-	0	0	0
1	11725522	11731896	MACS_peak_568	125.46	---	---	---	---	---	---	---	---	---	---	---	1	2	0
1	11774352	11775407	MACS_peak_569	184.43	AT1G32560	protein_coding_gene	Late embryogenesis abundant protein, group 1 protein	Encodes LEA4-1, a member of the Late Embryogenesis Abundant (LEA) proteins which typically accumulate in response to low water availability conditions imposed during development or by the environment.	Late embryogenesis abundant protein, group 1 protein; FUNCTIONS IN: molecular_function unknown; INVOLVED IN: embryo development, embryo development ending in seed dormancy; LOCATED IN: cellular_component unknown; EXPRESSED IN: stem; CONTAINS InterPro DOMAIN/s: Late embryogenesis abundant protein, group 1 (InterPro:IPR005513); BEST Arabidopsis thaliana protein match is: Late embryogenesis abundant…	0	1	TAIR10	11774484	11775279	+	0	0	0
1	11802175	11803210	MACS_peak_570	169.04	---	---	---	---	---	---	---	---	---	---	---	0	0	0
1	11810618	11813453	MACS_peak_571	604.64	AT1G32660	protein_coding_gene	F-box and associated interaction domains-containing protein	---	F-box and associated interaction domains-containing protein; CONTAINS InterPro DOMAIN/s: F-box domain, cyclin-like (InterPro:IPR001810), F-box domain, Skp2-like (InterPro:IPR022364), F-box associated domain, type 3 (InterPro:IPR013187), F-box associated interaction domain (InterPro:IPR017451); BEST Arabidopsis thaliana protein match is: F-box and associated interaction domains-containing protein …	0	1	TAIR10	11811040	11812380	+	0	1	0
1	11832738	11834571	MACS_peak_572	175.4	AT1G32713	miRNA	MIR829a; miRNA	Encodes a microRNA of unknown function. MicroRNAs are regulatory RNAs with a mature length of ~21-nucleotides that are processed from hairpin precursors by Dicer-like enzymes. MicroRNAs can negatively regulate gene expression by attenuating translation or by directing mRNA cleavage. Mature sequence: CAAAUUAAAGCUUCAAGGUAG	---	0	1	TAIR10	11834068	11834180	-	1	0	0
1	11865133	11867421	MACS_peak_573	138.48	AT1G32770	protein_coding_gene	NAC domain containing protein 12	Encodes SND1, a NAC Domain transcription factor involved in secondary wall biosynthesis in fibers. Expressed specifically in interfascicular fibers and xylary fibers in stems. Expressed in the procambium of stem inflorescences and root. May act as a negative regulator of secondary wall thickening in xylary fibers. Acts redundantly with NST1 to control development of secondary walls in siliques.	NAC domain containing protein 12 (NAC012); CONTAINS InterPro DOMAIN/s: No apical meristem (NAM) protein (InterPro:IPR003441); BEST Arabidopsis thaliana protein match is: NAC (No Apical Meristem) domain transcriptional regulator superfamily protein (TAIR:AT2G46770.1); Has 2894 Blast hits to 2888 proteins in 75 species: Archae - 0; Bacteria - 0; Metazoa - 0; Fungi - 0; Plants - 2894; Viruses - 0; O…	0	1	TAIR10	11865343	11866950	-	0	0	0
1	11871330	11873005	MACS_peak_574	60.08	AT1G32780	protein_coding_gene	GroES-like zinc-binding dehydrogenase family protein	---	GroES-like zinc-binding dehydrogenase family protein; FUNCTIONS IN: oxidoreductase activity, zinc ion binding; INVOLVED IN: oxidation reduction; EXPRESSED IN: 12 plant structures; EXPRESSED DURING: LP.04 four leaves visible, 4 anthesis, LP.02 two leaves visible, petal differentiation and expansion stage, D bilateral stage; CONTAINS InterPro DOMAIN/s: GroES-like (InterPro:IPR011032), Alcohol dehyd…	0	1	TAIR10	11869825	11872926	-	0	1	0
1	11905700	11906489	MACS_peak_575	65.08	AT1G32850	protein_coding_gene	ubiquitin-specific protease 11	---	ubiquitin-specific protease 11 (UBP11); FUNCTIONS IN: cysteine-type endopeptidase activity, ubiquitin thiolesterase activity; INVOLVED IN: ubiquitin-dependent protein catabolic process; LOCATED IN: cellular_component unknown; EXPRESSED IN: sperm cell, male gametophyte, pollen tube; EXPRESSED DURING: M germinated pollen stage; CONTAINS InterPro DOMAIN/s: Peptidase C19, ubiquitin carboxyl-terminal …	0	1	TAIR10	11902629	11906900	+	0	0	0
1	11925293	11926220	MACS_peak_576	71.15	AT1G32910	protein_coding_gene	HXXXD-type acyl-transferase family protein	---	HXXXD-type acyl-transferase family protein; FUNCTIONS IN: transferase activity, transferring acyl groups other than amino-acyl groups, transferase activity; INVOLVED IN: biological_process unknown; LOCATED IN: cellular_component unknown; CONTAINS InterPro DOMAIN/s: Transferase (InterPro:IPR003480); BEST Arabidopsis thaliana protein match is: HXXXD-type acyl-transferase family protein (TAIR:AT1G78…	0	1	TAIR10	11925426	11926908	+	0	0	0
1	11952826	11955446	MACS_peak_577	349.35	AT1G32980	protein_coding_gene	Subtilisin-like serine endopeptidase family protein	---	Subtilisin-like serine endopeptidase family protein; FUNCTIONS IN: serine-type endopeptidase activity; INVOLVED IN: proteolysis; LOCATED IN: cellular_component unknown; CONTAINS InterPro DOMAIN/s: Peptidase S8/S53, subtilisin/kexin/sedolisin (InterPro:IPR000209), Peptidase S8/S53, subtilisin, active site (InterPro:IPR022398), Peptidase S8, subtilisin-related (InterPro:IPR015500); BEST Arabidopsis…	0	1	TAIR10	11954278	11955362	-	1	0	0
1	11962428	11963769	MACS_peak_578	156.95	AT1G33020	protein_coding_gene	F-box and associated interaction domains-containing protein	---	F-box and associated interaction domains-containing protein; CONTAINS InterPro DOMAIN/s: F-box domain, cyclin-like (InterPro:IPR001810), F-box domain, Skp2-like (InterPro:IPR022364), F-box associated domain, type 3 (InterPro:IPR013187), F-box associated interaction domain (InterPro:IPR017451); BEST Arabidopsis thaliana protein match is: F-box and associated interaction domains-containing protein …	0	1	TAIR10	11962746	11964832	+	0	0	0
1	11986732	11987823	MACS_peak_579	100.53	AT1G33080	protein_coding_gene	MATE efflux family protein	---	MATE efflux family protein; FUNCTIONS IN: antiporter activity, drug transmembrane transporter activity, transporter activity; INVOLVED IN: drug transmembrane transport, transmembrane transport; LOCATED IN: membrane; EXPRESSED IN: 22 plant structures; EXPRESSED DURING: 13 growth stages; CONTAINS InterPro DOMAIN/s: Multi antimicrobial extrusion protein MatE (InterPro:IPR002528); BEST Arabidopsis th…	0	1	TAIR10	11985707	11990482	+	0	0	0
1	11988199	11990019	MACS_peak_580	72.49	AT1G33080	protein_coding_gene	MATE efflux family protein	---	MATE efflux family protein; FUNCTIONS IN: antiporter activity, drug transmembrane transporter activity, transporter activity; INVOLVED IN: drug transmembrane transport, transmembrane transport; LOCATED IN: membrane; EXPRESSED IN: 22 plant structures; EXPRESSED DURING: 13 growth stages; CONTAINS InterPro DOMAIN/s: Multi antimicrobial extrusion protein MatE (InterPro:IPR002528); BEST Arabidopsis th…	0	1	TAIR10	11985707	11990482	+	0	0	0
1	11992804	11996663	MACS_peak_581	165.72	AT1G33090	protein_coding_gene	MATE efflux family protein	---	MATE efflux family protein; FUNCTIONS IN: antiporter activity, drug transmembrane transporter activity, transporter activity; INVOLVED IN: drug transmembrane transport, transmembrane transport; LOCATED IN: membrane; CONTAINS InterPro DOMAIN/s: Multi antimicrobial extrusion protein MatE (InterPro:IPR002528); BEST Arabidopsis thaliana protein match is: MATE efflux family protein (TAIR:AT1G33110.1);…	0	1	TAIR10	11993298	11996712	+	2	2	0
1	12071470	12074175	MACS_peak_582	368.45	AT1G33290	protein_coding_gene	P-loop containing nucleoside triphosphate hydrolases superfamily protein	---	P-loop containing nucleoside triphosphate hydrolases superfamily protein; FUNCTIONS IN: nucleoside-triphosphatase activity, nucleotide binding, ATP binding; EXPRESSED IN: 23 plant structures; EXPRESSED DURING: 15 growth stages; CONTAINS InterPro DOMAIN/s: ATPase, AAA-type, core (InterPro:IPR003959), ATPase, AAA+ type, core (InterPro:IPR003593); BEST Arabidopsis thaliana protein match is: P-loop c…	0	1	TAIR10	12074099	12076104	+	0	0	0
1	12080901	12081733	MACS_peak_583	58.98	AT1G33320	protein_coding_gene	Pyridoxal phosphate (PLP)-dependent transferases superfamily protein	---	Pyridoxal phosphate (PLP)-dependent transferases superfamily protein; FUNCTIONS IN: pyridoxal phosphate binding, cystathionine gamma-synthase activity, catalytic activity; INVOLVED IN: methionine biosynthetic process, cellular amino acid metabolic process; EXPRESSED IN: root; CONTAINS InterPro DOMAIN/s: Pyridoxal phosphate-dependent transferase, major domain (InterPro:IPR015424), Cys/Met metaboli…	0	1	TAIR10	12081009	12083462	+	0	0	0
1	12133493	12135227	MACS_peak_584	51.4	---	---	---	---	---	---	---	---	---	---	---	0	0	0
1	12155702	12156883	MACS_peak_585	92.51	---	---	---	---	---	---	---	---	---	---	---	0	0	0
1	12159234	12163384	MACS_peak_586	122.26	AT1G33540	protein_coding_gene	serine carboxypeptidase-like 18	---	serine carboxypeptidase-like 18 (scpl18); FUNCTIONS IN: serine-type carboxypeptidase activity; INVOLVED IN: proteolysis; LOCATED IN: endomembrane system; EXPRESSED IN: root; CONTAINS InterPro DOMAIN/s: Peptidase S10, serine carboxypeptidase (InterPro:IPR001563); BEST Arabidopsis thaliana protein match is: serine carboxypeptidase-like 7 (TAIR:AT3G10450.1); Has 3653 Blast hits to 3603 proteins in 3…	0	1	TAIR10	12162349	12164700	-	0	0	0
1	12188789	12190025	MACS_peak_587	141.59	AT1G33610	protein_coding_gene	Leucine-rich repeat (LRR) family protein	---	Leucine-rich repeat (LRR) family protein; INVOLVED IN: signal transduction; LOCATED IN: endomembrane system; EXPRESSED IN: shoot apex, phloem, root, petiole, leaf; EXPRESSED DURING: LP.06 six leaves visible, LP.04 four leaves visible, LP.02 two leaves visible, LP.12 twelve leaves visible; CONTAINS InterPro DOMAIN/s: Leucine-rich repeat-containing N-terminal domain, type 2 (InterPro:IPR013210), Le…	0	1	TAIR10	12188910	12190418	+	0	2	0
1	12201651	12203465	MACS_peak_588	622.53	AT1G33670	protein_coding_gene	Leucine-rich repeat (LRR) family protein	---	Leucine-rich repeat (LRR) family protein; INVOLVED IN: signal transduction; LOCATED IN: endomembrane system; CONTAINS InterPro DOMAIN/s: Leucine-rich repeat-containing N-terminal domain, type 2 (InterPro:IPR013210), Leucine-rich repeat (InterPro:IPR001611); BEST Arabidopsis thaliana protein match is: Leucine-rich repeat (LRR) family protein (TAIR:AT1G33590.1); Has 70130 Blast hits to 27843 protei…	0	1	TAIR10	12201963	12203408	+	0	0	0
1	12218683	12222341	MACS_peak_589	248.46	AT1G33720	protein_coding_gene	cytochrome P450, family 76, subfamily C, polypeptide 6	member of CYP76C	cytochrome P450, family 76, subfamily C, polypeptide 6 (CYP76C6); FUNCTIONS IN: electron carrier activity, monooxygenase activity, iron ion binding, oxygen binding, heme binding; INVOLVED IN: oxidation reduction; LOCATED IN: endomembrane system; CONTAINS InterPro DOMAIN/s: Cytochrome P450 (InterPro:IPR001128), Cytochrome P450, E-class, group I (InterPro:IPR002401), Cytochrome P450, conserved site…	0	1	TAIR10	12220897	12224000	-	0	0	0
1	12248181	12250443	MACS_peak_590	294.36	---	---	---	---	---	---	---	---	---	---	---	1	1	0
1	12267892	12270158	MACS_peak_591	352.87	AT1G33811	protein_coding_gene	GDSL-like Lipase/Acylhydrolase superfamily protein	---	GDSL-like Lipase/Acylhydrolase superfamily protein; FUNCTIONS IN: hydrolase activity, acting on ester bonds, carboxylesterase activity; INVOLVED IN: lipid metabolic process; LOCATED IN: endomembrane system; EXPRESSED IN: 18 plant structures; EXPRESSED DURING: 13 growth stages; CONTAINS InterPro DOMAIN/s: Lipase, GDSL (InterPro:IPR001087); BEST Arabidopsis thaliana protein match is: GDSL-like Lipa…	0	1	TAIR10	12267866	12269913	+	0	0	0
1	12275278	12280339	MACS_peak_592	56.54	AT1G33830	protein_coding_gene	P-loop containing nucleoside triphosphate hydrolases superfamily protein	---	P-loop containing nucleoside triphosphate hydrolases superfamily protein; FUNCTIONS IN: GTP binding; INVOLVED IN: response to bacterium; LOCATED IN: cellular_component unknown; EXPRESSED IN: egg cell; CONTAINS InterPro DOMAIN/s: AIG1 (InterPro:IPR006703); BEST Arabidopsis thaliana protein match is: phloem protein 2-A3 (TAIR:AT2G26820.1); Has 1086 Blast hits to 949 proteins in 74 species: Archae -…	0	1	TAIR10	12279947	12281406	-	1	0	0
1	12294345	12295413	MACS_peak_593	116.22	AT1G33860	protein_coding_gene	---	---	unknown protein; Has 0 Blast hits to 0 proteins in 0 species (source: NCBI BLink).	0	1	TAIR10	12294394	12295305	+	0	1	0
1	12300943	12303137	MACS_peak_594	107.05	AT1G33870	protein_coding_gene	P-loop containing nucleoside triphosphate hydrolases superfamily protein	---	P-loop containing nucleoside triphosphate hydrolases superfamily protein; FUNCTIONS IN: GTP binding; INVOLVED IN: response to bacterium; LOCATED IN: cellular_component unknown; EXPRESSED IN: stem, root, seed; EXPRESSED DURING: F mature embryo stage; CONTAINS InterPro DOMAIN/s: AIG1 (InterPro:IPR006703); BEST Arabidopsis thaliana protein match is: P-loop containing nucleoside triphosphate hydrolas…	0	1	TAIR10	12301325	12302467	-	1	0	0
1	12319430	12323043	MACS_peak_595	131.42	AT1G33920	protein_coding_gene	phloem protein 2-A4	---	phloem protein 2-A4 (PP2-A4); BEST Arabidopsis thaliana protein match is: phloem protein 2-A1 (TAIR:AT4G19840.1); Has 458 Blast hits to 452 proteins in 37 species: Archae - 0; Bacteria - 0; Metazoa - 0; Fungi - 0; Plants - 458; Viruses - 0; Other Eukaryotes - 0 (source: NCBI BLink).	0	1	TAIR10	12319905	12320870	+	1	0	0
1	12325781	12327479	MACS_peak_596	193.89	AT1G33930	protein_coding_gene	P-loop containing nucleoside triphosphate hydrolases superfamily protein	---	P-loop containing nucleoside triphosphate hydrolases superfamily protein; FUNCTIONS IN: GTP binding; INVOLVED IN: response to bacterium; EXPRESSED IN: leaf lamina base, pedicel, petiole, leaf; EXPRESSED DURING: LP.04 four leaves visible, 4 anthesis; CONTAINS InterPro DOMAIN/s: AIG1 (InterPro:IPR006703); BEST Arabidopsis thaliana protein match is: P-loop containing nucleoside triphosphate hydrolas…	0	1	TAIR10	12323888	12327084	+	0	0	0
1	12340284	12341153	MACS_peak_597	63.27	---	---	---	---	---	---	---	---	---	---	---	1	0	0
1	12346080	12347378	MACS_peak_598	85.7	AT1G33960	protein_coding_gene	P-loop containing nucleoside triphosphate hydrolases superfamily protein	Identified as a gene that is induced by avirulence gene avrRpt2 and RPS2 after infection with Pseudomonas syringae pv maculicola strain ES4326 carrying avrRpt2	AVRRPT2-INDUCED GENE 1 (AIG1); FUNCTIONS IN: GTP binding; INVOLVED IN: response to bacterium; EXPRESSED IN: 11 plant structures; EXPRESSED DURING: 8 growth stages; CONTAINS InterPro DOMAIN/s: AIG1 (InterPro:IPR006703); BEST Arabidopsis thaliana protein match is: Avirulence induced gene (AIG1) family protein (TAIR:AT1G33950.1); Has 4495 Blast hits to 3349 proteins in 353 species: Archae - 20; Bact…	0	1	TAIR10	12346232	12348513	+	0	0	0
1	12347510	12348695	MACS_peak_599	82.82	AT1G33960	protein_coding_gene	P-loop containing nucleoside triphosphate hydrolases superfamily protein	Identified as a gene that is induced by avirulence gene avrRpt2 and RPS2 after infection with Pseudomonas syringae pv maculicola strain ES4326 carrying avrRpt2	AVRRPT2-INDUCED GENE 1 (AIG1); FUNCTIONS IN: GTP binding; INVOLVED IN: response to bacterium; EXPRESSED IN: 11 plant structures; EXPRESSED DURING: 8 growth stages; CONTAINS InterPro DOMAIN/s: AIG1 (InterPro:IPR006703); BEST Arabidopsis thaliana protein match is: Avirulence induced gene (AIG1) family protein (TAIR:AT1G33950.1); Has 4495 Blast hits to 3349 proteins in 353 species: Archae - 20; Bact…	0	1	TAIR10	12346232	12348513	+	0	0	0
1	12371974	12372901	MACS_peak_600	50.46	AT1G34030	protein_coding_gene	Ribosomal protein S13/S18 family	---	Ribosomal protein S13/S18 family; FUNCTIONS IN: structural constituent of ribosome, protein binding; INVOLVED IN: translation; LOCATED IN: in 6 components; EXPRESSED IN: 23 plant structures; EXPRESSED DURING: 13 growth stages; CONTAINS InterPro DOMAIN/s: Ribosomal protein S13-like, H2TH (InterPro:IPR010979), Ribosomal protein S13, conserved site (InterPro:IPR018269), Ribosomal protein S13 (InterP…	-422	1	TAIR10	12370065	12371553	-	0	1	0
1	12393080	12394888	MACS_peak_601	119.84	AT1G34050	protein_coding_gene	Ankyrin repeat family protein	---	Ankyrin repeat family protein; CONTAINS InterPro DOMAIN/s: Ankyrin repeat-containing domain (InterPro:IPR020683), Ankyrin repeat (InterPro:IPR002110); BEST Arabidopsis thaliana protein match is: Ankyrin repeat family protein (TAIR:AT5G54710.1); Has 21592 Blast hits to 11730 proteins in 530 species: Archae - 23; Bacteria - 1311; Metazoa - 12347; Fungi - 1424; Plants - 2545; Viruses - 58; Other Euk…	0	1	TAIR10	12393495	12396006	+	0	0	0
1	12433801	12435203	MACS_peak_602	176.38	AT1G34140	protein_coding_gene	poly(A) binding protein 1	polyadenylate-binding protein, putative / PABP, putative, non-consensus splice donor TA at exon 1; similar to polyadenylate-binding protein (poly(A)-binding protein) from (Triticum aestivum) GI:1737492, (Nicotiana tabacum) GI:7673355, {Arabidopsis thaliana} SP:P42731; contains InterPro entry IPR000504: RNA-binding region RNP-1 (RNA recognition motif) (RRM). Only member of the class IV PABP family.	poly(A) binding protein 1 (PAB1); CONTAINS InterPro DOMAIN/s: RNA recognition motif, RNP-1 (InterPro:IPR000504), Nucleotide-binding, alpha-beta plait (InterPro:IPR012677), RNA recognition, domain 1 (InterPro:IPR003954); BEST Arabidopsis thaliana protein match is: poly(A)-binding protein 5 (TAIR:AT1G71770.2); Has 11 Blast hits to 11 proteins in 5 species: Archae - 0; Bacteria - 0; Metazoa - 1; Fun…	0	1	TAIR10	12433356	12434735	-	1	0	0
1	12478757	12480136	MACS_peak_603	158.59	---	---	---	---	---	---	---	---	---	---	---	0	0	0
1	12480173	12481259	MACS_peak_604	167.36	---	---	---	---	---	---	---	---	---	---	---	0	0	0
1	12527539	12529667	MACS_peak_605	425.64	---	---	---	---	---	---	---	---	---	---	---	0	0	0
1	12555853	12556599	MACS_peak_606	97.5	AT1G34390	protein_coding_gene	auxin response factor 22	---	auxin response factor 22 (ARF22); FUNCTIONS IN: sequence-specific DNA binding transcription factor activity; INVOLVED IN: regulation of transcription; LOCATED IN: nucleus; CONTAINS InterPro DOMAIN/s: Aux/IAA-ARF-dimerisation (InterPro:IPR011525), Transcriptional factor B3 (InterPro:IPR003340), AUX/IAA protein (InterPro:IPR003311), Auxin response factor (InterPro:IPR010525); BEST Arabidopsis thali…	0	1	TAIR10	12556005	12559082	+	0	1	0
1	12594426	12598347	MACS_peak_607	227.24	AT1G34460	protein_coding_gene	CYCLIN B1;5	B1 type cyclin	CYCLIN B1;5 (CYCB1;5); FUNCTIONS IN: cyclin-dependent protein kinase regulator activity; INVOLVED IN: regulation of cell cycle; LOCATED IN: endomembrane system; EXPRESSED IN: male gametophyte, pollen tube; EXPRESSED DURING: L mature pollen stage, M germinated pollen stage; CONTAINS InterPro DOMAIN/s: Cyclin-like (InterPro:IPR011028), Cyclin-related (InterPro:IPR013763), Cyclin, N-terminal (InterP…	0	1	TAIR10	12595110	12599628	+	0	2	0
1	12602543	12603653	MACS_peak_608	76.65	AT1G34470	protein_coding_gene	Protein of unknown function (DUF803)	---	Protein of unknown function (DUF803); CONTAINS InterPro DOMAIN/s: Protein of unknown function DUF803 (InterPro:IPR008521); BEST Arabidopsis thaliana protein match is: Protein of unknown function (DUF803) (TAIR:AT4G09640.1); Has 1275 Blast hits to 1251 proteins in 224 species: Archae - 0; Bacteria - 101; Metazoa - 420; Fungi - 374; Plants - 269; Viruses - 0; Other Eukaryotes - 111 (source: NCBI BL…	-647	1	TAIR10	12604300	12607033	+	0	0	0
1	12607347	12608802	MACS_peak_609	124.68	AT1G34480	protein_coding_gene	Cysteine/Histidine-rich C1 domain family protein	---	Cysteine/Histidine-rich C1 domain family protein; FUNCTIONS IN: zinc ion binding; INVOLVED IN: biological_process unknown; LOCATED IN: intracellular; EXPRESSED IN: flower; EXPRESSED DURING: petal differentiation and expansion stage; CONTAINS InterPro DOMAIN/s: DC1 (InterPro:IPR004146), Zinc finger, PHD-type (InterPro:IPR001965), Zinc finger, B-box (InterPro:IPR000315), C1-like (InterPro:IPR011424…	0	1	TAIR10	12607276	12609084	+	0	0	0
1	12609637	12610586	MACS_peak_610	54.14	AT1G34490	protein_coding_gene	MBOAT (membrane bound O-acyl transferase) family protein	---	MBOAT (membrane bound O-acyl transferase) family protein; CONTAINS InterPro DOMAIN/s: Wax synthase (InterPro:IPR017088); BEST Arabidopsis thaliana protein match is: MBOAT (membrane bound O-acyl transferase) family protein (TAIR:AT1G34520.1); Has 686 Blast hits to 678 proteins in 232 species: Archae - 0; Bacteria - 388; Metazoa - 0; Fungi - 39; Plants - 230; Viruses - 0; Other Eukaryotes - 29 (sou…	0	1	TAIR10	12609482	12610495	+	0	0	0
1	12615463	12617925	MACS_peak_611	197.48	AT1G34510	protein_coding_gene	Peroxidase superfamily protein	---	Peroxidase superfamily protein; FUNCTIONS IN: peroxidase activity, heme binding; INVOLVED IN: oxidation reduction, response to oxidative stress; LOCATED IN: endomembrane system; EXPRESSED IN: root; CONTAINS InterPro DOMAIN/s: Haem peroxidase (InterPro:IPR010255), Plant peroxidase (InterPro:IPR000823), Peroxidase, active site (InterPro:IPR019794), Haem peroxidase, plant/fungal/bacterial (InterPro:…	0	1	TAIR10	12615733	12617032	-	1	0	0
1	12622908	12624625	MACS_peak_612	314.51	AT1G34520	protein_coding_gene	MBOAT (membrane bound O-acyl transferase) family protein	---	MBOAT (membrane bound O-acyl transferase) family protein; CONTAINS InterPro DOMAIN/s: Wax synthase (InterPro:IPR017088); BEST Arabidopsis thaliana protein match is: MBOAT (membrane bound O-acyl transferase) family protein (TAIR:AT1G34490.1); Has 1089 Blast hits to 1085 proteins in 421 species: Archae - 0; Bacteria - 800; Metazoa - 0; Fungi - 8; Plants - 227; Viruses - 0; Other Eukaryotes - 54 (so…	0	1	TAIR10	12623477	12624487	+	0	0	0
1	12637087	12638494	MACS_peak_613	79.82	AT1G34540	protein_coding_gene	cytochrome P450, family 94, subfamily D, polypeptide 1	member of CYP94D	cytochrome P450, family 94, subfamily D, polypeptide 1 (CYP94D1); FUNCTIONS IN: electron carrier activity, monooxygenase activity, iron ion binding, oxygen binding, heme binding; INVOLVED IN: oxidation reduction; LOCATED IN: endomembrane system; CONTAINS InterPro DOMAIN/s: Cytochrome P450 (InterPro:IPR001128), Cytochrome P450, E-class, group I (InterPro:IPR002401), Cytochrome P450, conserved site…	0	1	TAIR10	12637054	12638550	+	0	0	0
1	12638836	12640235	MACS_peak_614	215.44	---	---	---	---	---	---	---	---	---	---	---	0	0	0
1	12657334	12659036	MACS_peak_615	217.03	AT1G34575	protein_coding_gene	FAD-binding Berberine family protein	---	FAD-binding Berberine family protein; FUNCTIONS IN: electron carrier activity, oxidoreductase activity, FAD binding, catalytic activity; LOCATED IN: endomembrane system; CONTAINS InterPro DOMAIN/s: FAD-binding, type 2 (InterPro:IPR016166), Berberine/berberine-like (InterPro:IPR012951), FAD linked oxidase, N-terminal (InterPro:IPR006094); BEST Arabidopsis thaliana protein match is: FAD-binding Ber…	0	1	TAIR10	12657149	12658732	-	0	0	1
1	12695584	12698039	MACS_peak_616	253.07	AT1G34650	protein_coding_gene	homeodomain GLABROUS 10	Encodes a homeobox-leucine zipper family protein belonging to the HD-ZIP IV family.	homeodomain GLABROUS 10 (HDG10); FUNCTIONS IN: DNA binding, sequence-specific DNA binding transcription factor activity; INVOLVED IN: regulation of transcription, DNA-dependent, regulation of transcription; LOCATED IN: nucleus; EXPRESSED IN: anther; CONTAINS InterPro DOMAIN/s: Homeobox (InterPro:IPR001356), Homeodomain-like (InterPro:IPR009057), Lipid-binding START (InterPro:IPR002913), Homeodoma…	0	1	TAIR10	12692995	12697834	+	1	0	0
1	12705031	12708292	MACS_peak_617	94.22	AT1G34670	protein_coding_gene	myb domain protein 93	Member of the R2R3 factor gene family.	myb domain protein 93 (MYB93); CONTAINS InterPro DOMAIN/s: SANT, DNA-binding (InterPro:IPR001005), Homeodomain-like (InterPro:IPR009057), Myb, DNA-binding (InterPro:IPR014778), HTH transcriptional regulator, Myb-type, DNA-binding (InterPro:IPR017930), Homeodomain-related (InterPro:IPR012287), Myb transcription factor (InterPro:IPR015495); BEST Arabidopsis thaliana protein match is: myb domain pro…	-836	1	TAIR10	12709128	12710423	+	0	0	0
1	12708668	12711046	MACS_peak_618	108.84	AT1G34670	protein_coding_gene	myb domain protein 93	Member of the R2R3 factor gene family.	myb domain protein 93 (MYB93); CONTAINS InterPro DOMAIN/s: SANT, DNA-binding (InterPro:IPR001005), Homeodomain-like (InterPro:IPR009057), Myb, DNA-binding (InterPro:IPR014778), HTH transcriptional regulator, Myb-type, DNA-binding (InterPro:IPR017930), Homeodomain-related (InterPro:IPR012287), Myb transcription factor (InterPro:IPR015495); BEST Arabidopsis thaliana protein match is: myb domain pro…	0	1	TAIR10	12709128	12710423	+	0	0	0
1	12763503	12765696	MACS_peak_619	516.98	AT1G34790	protein_coding_gene	C2H2 and C2HC zinc fingers superfamily protein	Encodes a zinc finger protein; involved in photomorphogenesis, flavonoid biosynthesis, flower and seed development.	transparent testa 1 (TT1); CONTAINS InterPro DOMAIN/s: Zinc finger, C2H2-type (InterPro:IPR007087); BEST Arabidopsis thaliana protein match is: WIP domain protein 5 (TAIR:AT1G51220.1); Has 15538 Blast hits to 10276 proteins in 169 species: Archae - 0; Bacteria - 0; Metazoa - 14379; Fungi - 110; Plants - 685; Viruses - 0; Other Eukaryotes - 364 (source: NCBI BLink).	0	1	TAIR10	12763902	12765638	+	1	1	0
1	12851943	12853056	MACS_peak_620	118.52	AT1G35140	protein_coding_gene	Phosphate-responsive 1 family protein	EXL1 is involved in the C-starvation response. Phenotypic changes of an exl1 loss of function mutant became evident only under corresponding experimental conditions. For example, the mutant showed diminished biomass production in a short-day/low light growth regime, impaired survival during extended night, and impaired survival of anoxia stress.	PHOSPHATE-INDUCED 1 (PHI-1); CONTAINS InterPro DOMAIN/s: Phosphate-induced protein 1 (InterPro:IPR006766); BEST Arabidopsis thaliana protein match is: Phosphate-responsive 1 family protein (TAIR:AT4G08950.1); Has 400 Blast hits to 400 proteins in 24 species: Archae - 0; Bacteria - 2; Metazoa - 0; Fungi - 0; Plants - 398; Viruses - 0; Other Eukaryotes - 0 (source: NCBI BLink).	0	1	TAIR10	12851997	12853128	+	0	1	1
1	12885580	12886312	MACS_peak_621	62.18	---	---	---	---	---	---	---	---	---	---	---	1	0	0
1	12896618	12897681	MACS_peak_622	139.22	AT1G35210	protein_coding_gene	---	---	unknown protein; FUNCTIONS IN: molecular_function unknown; INVOLVED IN: biological_process unknown; LOCATED IN: chloroplast; EXPRESSED IN: 14 plant structures; EXPRESSED DURING: 9 growth stages; CONTAINS InterPro DOMAIN/s: Protein of unknown function DUF740 (InterPro:IPR008004); BEST Arabidopsis thaliana protein match is: unknown protein (TAIR:AT1G22470.1); Has 83 Blast hits to 83 proteins in 12 …	0	1	TAIR10	12896652	12897402	-	0	1	0
1	12917057	12917875	MACS_peak_623	133.19	AT1G35230	protein_coding_gene	arabinogalactan protein 5	Encodes arabinogalactan-protein (AGP5).	arabinogalactan protein 5 (AGP5); BEST Arabidopsis thaliana protein match is: arabinogalactan protein 10 (TAIR:AT4G09030.1); Has 52009 Blast hits to 24079 proteins in 1500 species: Archae - 200; Bacteria - 14022; Metazoa - 11286; Fungi - 4612; Plants - 7669; Viruses - 1962; Other Eukaryotes - 12258 (source: NCBI BLink).	0	1	TAIR10	12917149	12917763	+	0	1	0
1	12919392	12920777	MACS_peak_624	103.55	---	---	---	---	---	---	---	---	---	---	---	0	0	0
1	12936657	12938165	MACS_peak_625	103.69	AT1G35260	protein_coding_gene	MLP-like protein 165	---	MLP-like protein 165 (MLP165); FUNCTIONS IN: molecular_function unknown; INVOLVED IN: response to biotic stimulus, defense response; LOCATED IN: cellular_component unknown; EXPRESSED IN: 15 plant structures; EXPRESSED DURING: 7 growth stages; CONTAINS InterPro DOMAIN/s: Bet v I allergen (InterPro:IPR000916); BEST Arabidopsis thaliana protein match is: MLP-like protein 168 (TAIR:AT1G35310.1); Has …	0	1	TAIR10	12936849	12937787	-	1	1	0
1	12939405	12941124	MACS_peak_626	75.21	---	---	---	---	---	---	---	---	---	---	---	1	0	0
1	12948070	12949034	MACS_peak_627	84.61	AT1G35290	protein_coding_gene	Thioesterase superfamily protein	---	Thioesterase superfamily protein; CONTAINS InterPro DOMAIN/s: Thioesterase superfamily (InterPro:IPR006683); BEST Arabidopsis thaliana protein match is: Thioesterase superfamily protein (TAIR:AT1G35250.1); Has 1308 Blast hits to 1307 proteins in 471 species: Archae - 6; Bacteria - 942; Metazoa - 0; Fungi - 0; Plants - 80; Viruses - 0; Other Eukaryotes - 280 (source: NCBI BLink).	0	1	TAIR10	12947544	12948841	-	1	0	0
1	12956049	12958693	MACS_peak_628	84.39	AT1G35310	protein_coding_gene	MLP-like protein 168	---	MLP-like protein 168 (MLP168); FUNCTIONS IN: molecular_function unknown; INVOLVED IN: response to biotic stimulus, defense response; LOCATED IN: cellular_component unknown; EXPRESSED IN: 13 plant structures; EXPRESSED DURING: LP.04 four leaves visible, 4 anthesis, C globular stage, petal differentiation and expansion stage; CONTAINS InterPro DOMAIN/s: Bet v I allergen (InterPro:IPR000916); BEST A…	0	1	TAIR10	12956159	12957090	-	0	0	0
1	12962063	12967174	MACS_peak_629	236.36	AT1G35320	protein_coding_gene	---	---	unknown protein; BEST Arabidopsis thaliana protein match is: unknown protein (TAIR:AT3G30160.1); Has 9 Blast hits to 9 proteins in 1 species: Archae - 0; Bacteria - 0; Metazoa - 0; Fungi - 0; Plants - 9; Viruses - 0; Other Eukaryotes - 0 (source: NCBI BLink).	0	1	TAIR10	12959057	12962853	-	0	2	0
1	12988246	12989620	MACS_peak_630	97.78	---	---	---	---	---	---	---	---	---	---	---	0	0	0
1	12990042	12992783	MACS_peak_631	132.08	AT1G35365	protein_coding_gene	Protein of unknown function (DUF1184)	---	Protein of unknown function (DUF1184); CONTAINS InterPro DOMAIN/s: Protein of unknown function DUF1184 (InterPro:IPR009568); BEST Arabidopsis thaliana protein match is: Protein of unknown function (DUF1184) (TAIR:AT3G27900.1); Has 46 Blast hits to 36 proteins in 2 species: Archae - 0; Bacteria - 0; Metazoa - 0; Fungi - 0; Plants - 46; Viruses - 0; Other Eukaryotes - 0 (source: NCBI BLink).	0	1	TAIR10	12991392	12992145	+	0	0	0
1	13034847	13036310	MACS_peak_632	435.11	AT1G35440	protein_coding_gene	cyclin T1;1	---	cyclin T1;1 (CYCT1;1); CONTAINS InterPro DOMAIN/s: Cyclin-like (InterPro:IPR011028), Transcription regulator cyclin (InterPro:IPR015429), Cyclin-related (InterPro:IPR013763), Cyclin, N-terminal (InterPro:IPR006671), Cyclin (InterPro:IPR006670); BEST Arabidopsis thaliana protein match is: Cyclin family protein (TAIR:AT5G45190.1); Has 1935 Blast hits to 1935 proteins in 244 species: Archae - 0; Bac…	0	1	TAIR10	13035294	13036037	-	1	1	0
1	13044964	13045921	MACS_peak_633	102	---	---	---	---	---	---	---	---	---	---	---	0	0	0
1	13061579	13063333	MACS_peak_634	301.5	AT1G35490	protein_coding_gene	bZIP family transcription factor	---	bZIP family transcription factor; FUNCTIONS IN: DNA binding, sequence-specific DNA binding transcription factor activity; INVOLVED IN: regulation of transcription, DNA-dependent; EXPRESSED IN: 9 plant structures; EXPRESSED DURING: L mature pollen stage, M germinated pollen stage, 4 anthesis, C globular stage, petal differentiation and expansion stage; CONTAINS InterPro DOMAIN/s: Basic-leucine zip…	0	1	TAIR10	13061638	13063450	+	0	0	0
1	13085298	13085760	MACS_peak_635	81.77	AT1G35520	protein_coding_gene	auxin response factor 15	---	auxin response factor 15 (ARF15); FUNCTIONS IN: sequence-specific DNA binding transcription factor activity; INVOLVED IN: regulation of transcription; LOCATED IN: nucleus; CONTAINS InterPro DOMAIN/s: Aux/IAA-ARF-dimerisation (InterPro:IPR011525), Transcriptional factor B3 (InterPro:IPR003340), AUX/IAA protein (InterPro:IPR003311), Auxin response factor (InterPro:IPR010525); BEST Arabidopsis thali…	0	1	TAIR10	13082819	13085830	-	0	1	0
1	13101991	13103520	MACS_peak_636	192	---	---	---	---	---	---	---	---	---	---	---	0	1	0
1	13108572	13109235	MACS_peak_637	94.3	AT1G35540	protein_coding_gene	auxin response factor 14	---	auxin response factor 14 (ARF14); FUNCTIONS IN: sequence-specific DNA binding transcription factor activity; INVOLVED IN: regulation of transcription; LOCATED IN: nucleus; CONTAINS InterPro DOMAIN/s: Aux/IAA-ARF-dimerisation (InterPro:IPR011525), Transcriptional factor B3 (InterPro:IPR003340), AUX/IAA protein (InterPro:IPR003311), Auxin response factor (InterPro:IPR010525); BEST Arabidopsis thali…	0	1	TAIR10	13108634	13111700	+	0	1	0
1	13112041	13114527	MACS_peak_638	333.65	AT1G35550	protein_coding_gene	elongation factor Tu C-terminal domain-containing protein	---	elongation factor Tu C-terminal domain-containing protein; FUNCTIONS IN: GTP binding, translation elongation factor activity; INVOLVED IN: translational elongation; LOCATED IN: cellular_component unknown; EXPRESSED IN: 22 plant structures; EXPRESSED DURING: 13 growth stages; CONTAINS InterPro DOMAIN/s: Translation elongation factor EFTu/EF1A, C-terminal (InterPro:IPR004160), Translation elongatio…	0	1	TAIR10	13112506	13113136	+	1	0	0
1	13119316	13120545	MACS_peak_639	193.96	---	---	---	---	---	---	---	---	---	---	---	0	0	0
1	13163104	13163950	MACS_peak_640	67.99	AT1G35630	protein_coding_gene	Protease-associated (PA) RING/U-box zinc finger family protein	---	Protease-associated (PA) RING/U-box zinc finger family protein; FUNCTIONS IN: peptidase activity, zinc ion binding; LOCATED IN: endomembrane system; CONTAINS InterPro DOMAIN/s: Protease-associated PA (InterPro:IPR003137), Zinc finger, RING-type (InterPro:IPR001841), Zinc finger, C3HC4 RING-type (InterPro:IPR018957); BEST Arabidopsis thaliana protein match is: RING/U-box superfamily protein (TAIR:…	0	1	TAIR10	13162966	13164512	-	0	0	0
1	13168060	13169746	MACS_peak_641	203.22	---	---	---	---	---	---	---	---	---	---	---	1	2	0
1	13214125	13215225	MACS_peak_642	136.46	---	---	---	---	---	---	---	---	---	---	---	0	0	0
1	13252810	13255769	MACS_peak_643	260.26	AT1G35750	protein_coding_gene	pumilio 10	Encodes a member of the Arabidopsis Pumilio (APUM) proteins containing PUF domain (eight repeats of approximately 36 amino acids each). PUF proteins regulate both mRNA stability and translation through sequence-specific binding to the 3' UTR of target mRNA transcripts.	pumilio 10 (PUM10); FUNCTIONS IN: RNA binding, binding; INVOLVED IN: biological_process unknown; LOCATED IN: cytoplasm; CONTAINS InterPro DOMAIN/s: Pumilio RNA-binding repeat (InterPro:IPR001313), Armadillo-like helical (InterPro:IPR011989), Armadillo-type fold (InterPro:IPR016024); BEST Arabidopsis thaliana protein match is: pumilio 9 (TAIR:AT1G35730.1); Has 2529 Blast hits to 1627 proteins in 2…	0	1	TAIR10	13253398	13255570	-	0	3	0
1	13280816	13283570	MACS_peak_644	650.88	AT1G35780	protein_coding_gene	---	---	unknown protein; BEST Arabidopsis thaliana protein match is: unknown protein (TAIR:AT1G78150.2); Has 145 Blast hits to 144 proteins in 16 species: Archae - 0; Bacteria - 0; Metazoa - 0; Fungi - 0; Plants - 145; Viruses - 0; Other Eukaryotes - 0 (source: NCBI BLink).	-528	1	TAIR10	13277274	13280289	-	1	1	1
1	13314535	13317098	MACS_peak_645	164.61	---	---	---	---	---	---	---	---	---	---	---	0	0	0
1	13320586	13322501	MACS_peak_646	270.79	AT1G35830	protein_coding_gene	VQ motif-containing protein	---	VQ motif-containing protein; CONTAINS InterPro DOMAIN/s: VQ (InterPro:IPR008889); BEST Arabidopsis thaliana protein match is: VQ motif-containing protein (TAIR:AT5G65170.1); Has 1167 Blast hits to 1059 proteins in 155 species: Archae - 0; Bacteria - 36; Metazoa - 369; Fungi - 192; Plants - 292; Viruses - 57; Other Eukaryotes - 221 (source: NCBI BLink).	0	1	TAIR10	13321214	13322122	-	0	1	1
1	13339557	13340450	MACS_peak_647	61.41	AT1G35880	protein_coding_gene	---	---	unknown protein; Has 251 Blast hits to 234 proteins in 66 species: Archae - 2; Bacteria - 48; Metazoa - 87; Fungi - 9; Plants - 70; Viruses - 0; Other Eukaryotes - 35 (source: NCBI BLink).	0	1	TAIR10	13339851	13341228	-	0	0	0
1	13362316	13365046	MACS_peak_648	58.84	AT1G35910	protein_coding_gene	Haloacid dehalogenase-like hydrolase (HAD) superfamily protein	---	Haloacid dehalogenase-like hydrolase (HAD) superfamily protein; FUNCTIONS IN: catalytic activity, trehalose-phosphatase activity; INVOLVED IN: trehalose biosynthetic process, metabolic process; EXPRESSED IN: 14 plant structures; EXPRESSED DURING: 4 anthesis, C globular stage, F mature embryo stage, petal differentiation and expansion stage, E expanded cotyledon stage; CONTAINS InterPro DOMAIN/s: …	0	1	TAIR10	13363003	13365060	-	0	1	1
1	13366489	13369055	MACS_peak_649	213.12	---	---	---	---	---	---	---	---	---	---	---	2	0	0
1	13455132	13457915	MACS_peak_650	266.97	AT1G36060	protein_coding_gene	Integrase-type DNA-binding superfamily protein	encodes a member of the DREB subfamily A-6 of ERF/AP2 transcription factor family. The protein contains one AP2 domain. There are 8 members in this subfamily including RAP2.4.	Integrase-type DNA-binding superfamily protein; FUNCTIONS IN: DNA binding, sequence-specific DNA binding transcription factor activity; INVOLVED IN: regulation of transcription, DNA-dependent; LOCATED IN: nucleus; EXPRESSED IN: root, flower; EXPRESSED DURING: petal differentiation and expansion stage; CONTAINS InterPro DOMAIN/s: DNA-binding, integrase-type (InterPro:IPR016177), Pathogenesis-relat…	0	1	TAIR10	13454496	13456331	-	0	2	0
1	13470831	13473208	MACS_peak_651	235.96	AT1G36070	protein_coding_gene	Transducin/WD40 repeat-like superfamily protein	---	Transducin/WD40 repeat-like superfamily protein; FUNCTIONS IN: molecular_function unknown; INVOLVED IN: biological_process unknown; LOCATED IN: CUL4 RING ubiquitin ligase complex, heterotrimeric G-protein complex; EXPRESSED IN: 22 plant structures; EXPRESSED DURING: 13 growth stages; CONTAINS InterPro DOMAIN/s: WD40 repeat 2 (InterPro:IPR019782), WD40 repeat-like-containing domain (InterPro:IPR01…	0	1	TAIR10	13466911	13470936	-	0	0	0
1	13528895	13529627	MACS_peak_652	70.03	AT1G36150	protein_coding_gene	Bifunctional inhibitor/lipid-transfer protein/seed storage 2S albumin superfamily protein	---	Bifunctional inhibitor/lipid-transfer protein/seed storage 2S albumin superfamily protein; FUNCTIONS IN: lipid binding; INVOLVED IN: lipid transport; LOCATED IN: anchored to membrane; EXPRESSED IN: leaf whorl, sepal, flower; EXPRESSED DURING: petal differentiation and expansion stage; CONTAINS InterPro DOMAIN/s: Bifunctional inhibitor/plant lipid transfer protein/seed storage (InterPro:IPR016140)…	0	1	TAIR10	13528257	13529470	+	1	0	0
1	13838197	13838944	MACS_peak_653	52.67	---	---	---	---	---	---	---	---	---	---	---	0	0	0
1	13978820	13979748	MACS_peak_654	56.9	---	---	---	---	---	---	---	---	---	---	---	0	1	0
1	14158472	14159543	MACS_peak_655	76.43	AT1G37130	protein_coding_gene	nitrate reductase 2	Identified as a mutant resistant to chlorate. Encodes nitrate reductase structural gene. Involved in nitrate assimilation. Has nitrate reductase activity. Up-regulated by the fungus P. indica. Binds transcription factor At2g35940.	nitrate reductase 2 (NIA2); FUNCTIONS IN: nitrate reductase activity, nitrate reductase (NADH) activity; INVOLVED IN: nitric oxide biosynthetic process, nitrate assimilation, response to light stimulus, response to symbiotic fungus; LOCATED IN: plasma membrane, vacuole; EXPRESSED IN: 25 plant structures; EXPRESSED DURING: 13 growth stages; CONTAINS InterPro DOMAIN/s: Nitrate reductase NADH depend…	0	1	TAIR10	14158527	14161938	+	0	1	0
1	14160050	14161023	MACS_peak_656	75.64	AT1G37130	protein_coding_gene	nitrate reductase 2	Identified as a mutant resistant to chlorate. Encodes nitrate reductase structural gene. Involved in nitrate assimilation. Has nitrate reductase activity. Up-regulated by the fungus P. indica. Binds transcription factor At2g35940.	nitrate reductase 2 (NIA2); FUNCTIONS IN: nitrate reductase activity, nitrate reductase (NADH) activity; INVOLVED IN: nitric oxide biosynthetic process, nitrate assimilation, response to light stimulus, response to symbiotic fungus; LOCATED IN: plasma membrane, vacuole; EXPRESSED IN: 25 plant structures; EXPRESSED DURING: 13 growth stages; CONTAINS InterPro DOMAIN/s: Nitrate reductase NADH depend…	0	1	TAIR10	14158527	14161938	+	0	0	0
1	14169883	14173008	MACS_peak_657	744.73	AT1G37140	protein_coding_gene	MEI2 C-terminal RRM only like 1	a member of mei2-like gene family; phylogenetic analysis revealed that it belongs to the fourth clade of mei2-like proteins, with conserved C-terminal RNA recognition motif (RRM) only.	MEI2 C-terminal RRM only like 1 (MCT1); CONTAINS InterPro DOMAIN/s: RNA recognition motif 2 (InterPro:IPR007201); BEST Arabidopsis thaliana protein match is: terminal EAR1-like 2 (TAIR:AT1G67770.1); Has 394 Blast hits to 394 proteins in 86 species: Archae - 0; Bacteria - 0; Metazoa - 0; Fungi - 60; Plants - 240; Viruses - 0; Other Eukaryotes - 94 (source: NCBI BLink).	0	1	TAIR10	14170351	14172041	-	0	1	0
1	15083018	15083959	MACS_peak_658	80.4	AT1G40104	protein_coding_gene	---	---	unknown protein; FUNCTIONS IN: molecular_function unknown; INVOLVED IN: biological_process unknown; LOCATED IN: cellular_component unknown; BEST Arabidopsis thaliana protein match is: unknown protein (TAIR:AT2G08986.1); Has 88 Blast hits to 39 proteins in 18 species: Archae - 0; Bacteria - 17; Metazoa - 9; Fungi - 0; Plants - 48; Viruses - 0; Other Eukaryotes - 14 (source: NCBI BLink).	0	1	TAIR10	15081952	15085893	+	0	0	0
1	15981575	15983701	MACS_peak_659	254.93	AT1G42560	protein_coding_gene	Seven transmembrane MLO family protein	A member of a large family of seven-transmembrane domain proteins specific to plants, homologs of the barley mildew resistance locus o (MLO) protein. The Arabidopsis genome contains 15 genes encoding MLO proteins, with localization in plasma membrane. Phylogenetic analysis revealed four clades of closely-related AtMLO genes. ATMLO9 belongs to the clade III, with AtMLO5, AtMLO7, AtMLO8, and AtMLO1…	MILDEW RESISTANCE LOCUS O 9 (MLO9); FUNCTIONS IN: calmodulin binding; INVOLVED IN: cell death, defense response; LOCATED IN: integral to membrane, plasma membrane; EXPRESSED IN: 8 plant structures; EXPRESSED DURING: 4 anthesis, petal differentiation and expansion stage; CONTAINS InterPro DOMAIN/s: Mlo-related protein (InterPro:IPR004326); BEST Arabidopsis thaliana protein match is: Seven transmem…	0	1	TAIR10	15980135	15983328	-	0	1	0
1	16131537	16132450	MACS_peak_660	168.76	AT1G42980	protein_coding_gene	Actin-binding FH2 (formin homology 2) family protein	---	Actin-binding FH2 (formin homology 2) family protein; FUNCTIONS IN: actin binding; LOCATED IN: endomembrane system; CONTAINS InterPro DOMAIN/s: Actin-binding FH2 (InterPro:IPR015425); BEST Arabidopsis thaliana protein match is: Formin Homology 14 (TAIR:AT1G31810.1); Has 905 Blast hits to 899 proteins in 94 species: Archae - 0; Bacteria - 0; Metazoa - 566; Fungi - 10; Plants - 221; Viruses - 0; Ot…	-836	1	TAIR10	16133286	16135587	+	0	1	0
1	16150613	16155213	MACS_peak_661	340.83	AT1G43010	protein_coding_gene	Pentatricopeptide repeat (PPR) superfamily protein	---	Pentatricopeptide repeat (PPR) superfamily protein; CONTAINS InterPro DOMAIN/s: Pentatricopeptide repeat (InterPro:IPR002885); BEST Arabidopsis thaliana protein match is: Tetratricopeptide repeat (TPR)-like superfamily protein (TAIR:AT1G28020.1); Has 605 Blast hits to 542 proteins in 61 species: Archae - 0; Bacteria - 0; Metazoa - 0; Fungi - 0; Plants - 603; Viruses - 0; Other Eukaryotes - 2 (sou…	0	1	TAIR10	16153609	16154468	+	1	2	0
1	16231471	16236254	MACS_peak_662	445.82	AT1G43140	protein_coding_gene	Cullin family protein	---	Cullin family protein; FUNCTIONS IN: ubiquitin protein ligase binding; INVOLVED IN: ubiquitin-dependent protein catabolic process; LOCATED IN: endomembrane system, cullin-RING ubiquitin ligase complex; EXPRESSED IN: root, flower; EXPRESSED DURING: petal differentiation and expansion stage; CONTAINS InterPro DOMAIN/s: Winged helix-turn-helix transcription repressor DNA-binding (InterPro:IPR011991)…	0	1	TAIR10	16232785	16236109	+	1	2	0
1	16263574	16264293	MACS_peak_663	52.9	AT1G43160	protein_coding_gene	related to AP2 6	encodes a member of the ERF (ethylene response factor) subfamily B-4 of ERF/AP2 transcription factor family (RAP2.6). The protein contains one AP2 domain. There are 7 members in this subfamily.	related to AP2 6 (RAP2.6); CONTAINS InterPro DOMAIN/s: DNA-binding, integrase-type (InterPro:IPR016177), Pathogenesis-related transcriptional factor/ERF, DNA-binding (InterPro:IPR001471); BEST Arabidopsis thaliana protein match is: Integrase-type DNA-binding superfamily protein (TAIR:AT5G61890.1); Has 6219 Blast hits to 5840 proteins in 256 species: Archae - 0; Bacteria - 2; Metazoa - 0; Fungi - …	0	1	TAIR10	16263813	16264818	+	0	0	0
1	16439420	16440528	MACS_peak_664	72.33	AT1G43640	protein_coding_gene	tubby like protein 5	Member of TLP family	tubby like protein 5 (TLP5); CONTAINS InterPro DOMAIN/s: F-box domain, cyclin-like (InterPro:IPR001810), Tubby, C-terminal, conserved site (InterPro:IPR018066), Tubby, C-terminal (InterPro:IPR000007); BEST Arabidopsis thaliana protein match is: tubby like protein 1 (TAIR:AT1G76900.2); Has 930 Blast hits to 929 proteins in 116 species: Archae - 0; Bacteria - 0; Metazoa - 348; Fungi - 19; Plants - …	0	1	TAIR10	16439435	16441844	-	0	0	0
1	16446408	16447163	MACS_peak_665	70.32	AT1G43650	protein_coding_gene	nodulin MtN21 /EamA-like transporter family protein	nodulin MtN21-like transporter family protein	nodulin MtN21 /EamA-like transporter family protein; LOCATED IN: endomembrane system, membrane; EXPRESSED IN: 10 plant structures; EXPRESSED DURING: 7 growth stages; CONTAINS InterPro DOMAIN/s: Protein of unknown function DUF6, transmembrane (InterPro:IPR000620); BEST Arabidopsis thaliana protein match is: nodulin MtN21 /EamA-like transporter family protein (TAIR:AT5G64700.1); Has 3287 Blast hits…	0	1	TAIR10	16443685	16446886	-	0	0	0
1	16577391	16580286	MACS_peak_666	355.4	AT1G43800	protein_coding_gene	Plant stearoyl-acyl-carrier-protein desaturase family protein	---	Plant stearoyl-acyl-carrier-protein desaturase family protein; FUNCTIONS IN: acyl-[acyl-carrier-protein] desaturase activity, oxidoreductase activity, transition metal ion binding; INVOLVED IN: oxidation reduction, fatty acid metabolic process, fatty acid biosynthetic process; LOCATED IN: membrane; EXPRESSED IN: 9 plant structures; EXPRESSED DURING: 6 growth stages; CONTAINS InterPro DOMAIN/s: Ri…	0	1	TAIR10	16577610	16579722	+	0	1	0
1	16643570	16645177	MACS_peak_667	322.71	---	---	---	---	---	---	---	---	---	---	---	0	0	0
1	16738806	16741522	MACS_peak_668	610.15	AT1G44050	protein_coding_gene	Cysteine/Histidine-rich C1 domain family protein	---	Cysteine/Histidine-rich C1 domain family protein; FUNCTIONS IN: zinc ion binding; INVOLVED IN: intracellular signaling pathway; LOCATED IN: cellular_component unknown; EXPRESSED IN: root; CONTAINS InterPro DOMAIN/s: Protein kinase C-like, phorbol ester/diacylglycerol binding (InterPro:IPR002219), DC1 (InterPro:IPR004146), Zinc finger, PHD-type (InterPro:IPR001965), C1-like (InterPro:IPR011424); B…	0	1	TAIR10	16739261	16741513	+	0	1	0
1	16753818	16756084	MACS_peak_669	548.66	AT1G44080	protein_coding_gene	F-box family protein with a domain of unknown function (DUF295)	---	F-box family protein with a domain of unknown function (DUF295); CONTAINS InterPro DOMAIN/s: Protein of unknown function DUF295 (InterPro:IPR005174); BEST Arabidopsis thaliana protein match is: F-box family protein with a domain of unknown function (DUF295) (TAIR:AT4G35733.1); Has 257 Blast hits to 253 proteins in 11 species: Archae - 0; Bacteria - 0; Metazoa - 0; Fungi - 0; Plants - 257; Viruses…	0	1	TAIR10	16753944	16755670	-	1	2	0
1	16760909	16762726	MACS_peak_670	346.66	AT1G44090	protein_coding_gene	gibberellin 20-oxidase 5	Encodes a gibberellin 20-oxidase.	gibberellin 20-oxidase 5 (GA20OX5); CONTAINS InterPro DOMAIN/s: Isopenicillin N synthase (InterPro:IPR002283), Oxoglutarate/iron-dependent oxygenase (InterPro:IPR005123); BEST Arabidopsis thaliana protein match is: gibberellin 20-oxidase 3 (TAIR:AT5G07200.1); Has 8296 Blast hits to 8263 proteins in 963 species: Archae - 0; Bacteria - 1043; Metazoa - 120; Fungi - 995; Plants - 4852; Viruses - 0; O…	0	1	TAIR10	16760677	16762486	-	0	0	0
1	16811050	16815822	MACS_peak_671	143.27	AT1G44191	protein_coding_gene	ECA1 gametogenesis related family protein	Encodes a ECA1 gametogenesis related family protein	ECA1 gametogenesis related family protein; LOCATED IN: endomembrane system; BEST Arabidopsis thaliana protein match is: unknown protein (TAIR:AT3G50580.1); Has 538503 Blast hits to 141081 proteins in 3721 species: Archae - 1338; Bacteria - 118954; Metazoa - 201066; Fungi - 82925; Plants - 52840; Viruses - 13353; Other Eukaryotes - 68027 (source: NCBI BLink).	0	1	TAIR10	16813654	16814733	-	1	1	1
1	16820623	16822528	MACS_peak_672	90.71	AT1G44224	protein_coding_gene	ECA1 gametogenesis related family protein	Encodes a ECA1 gametogenesis related family protein	ECA1 gametogenesis related family protein; LOCATED IN: endomembrane system; EXPRESSED IN: petal, leaf whorl, sepal, flower; EXPRESSED DURING: 4 anthesis, petal differentiation and expansion stage; BEST Arabidopsis thaliana protein match is: hydroxyproline-rich glycoprotein family protein (TAIR:AT3G50570.1); Has 7891 Blast hits to 2246 proteins in 385 species: Archae - 0; Bacteria - 2651; Metazoa …	0	1	TAIR10	16820946	16821808	-	0	0	0
1	16828739	16832942	MACS_peak_673	214.56	AT1G44318	protein_coding_gene	Aldolase superfamily protein	---	hemb2; FUNCTIONS IN: porphobilinogen synthase activity, catalytic activity, metal ion binding; INVOLVED IN: porphyrin biosynthetic process; EXPRESSED IN: root; CONTAINS InterPro DOMAIN/s: Aldolase-type TIM barrel (InterPro:IPR013785), Tetrapyrrole biosynthesis, porphobilinogen synthase (InterPro:IPR001731); BEST Arabidopsis thaliana protein match is: Aldolase superfamily protein (TAIR:AT1G69740.2…	0	1	TAIR10	16831016	16833916	+	0	4	0
1	16846700	16847422	MACS_peak_674	59.87	AT1G44414	protein_coding_gene	---	---	unknown protein; Has 29 Blast hits to 29 proteins in 12 species: Archae - 0; Bacteria - 4; Metazoa - 0; Fungi - 0; Plants - 25; Viruses - 0; Other Eukaryotes - 0 (source: NCBI BLink).	-359	1	TAIR10	16847781	16848086	+	0	0	0
1	16852325	16853437	MACS_peak_675	104.56	AT1G44478	protein_coding_gene	Cyclophilin	---	Cyclophilin; BEST Arabidopsis thaliana protein match is: cyclophilin 59 (TAIR:AT1G53720.1); Has 400 Blast hits to 376 proteins in 89 species: Archae - 0; Bacteria - 0; Metazoa - 254; Fungi - 13; Plants - 87; Viruses - 0; Other Eukaryotes - 46 (source: NCBI BLink).	0	1	TAIR10	16852341	16853238	-	0	1	0
1	16865011	16866744	MACS_peak_676	62.89	AT1G44542	protein_coding_gene	Cyclase family protein	---	Cyclase family protein; FUNCTIONS IN: molecular_function unknown; INVOLVED IN: biological_process unknown; LOCATED IN: endomembrane system; CONTAINS InterPro DOMAIN/s: Putative cyclase (InterPro:IPR007325); BEST Arabidopsis thaliana protein match is: Cyclase family protein (TAIR:AT4G34180.1); Has 1444 Blast hits to 1444 proteins in 543 species: Archae - 85; Bacteria - 1182; Metazoa - 21; Fungi - …	0	1	TAIR10	16864970	16866605	-	1	0	0
1	16867694	16869249	MACS_peak_677	298.57	---	---	---	---	---	---	---	---	---	---	---	0	1	0
1	16888081	16889026	MACS_peak_678	83.67	AT1G44740	protein_coding_gene	---	---	unknown protein; FUNCTIONS IN: molecular_function unknown; INVOLVED IN: biological_process unknown; LOCATED IN: mitochondrion; EXPRESSED IN: embryo, leaf whorl, flower, seed; EXPRESSED DURING: F mature embryo stage, petal differentiation and expansion stage, E expanded cotyledon stage, D bilateral stage; Has 8 Blast hits to 7 proteins in 3 species: Archae - 0; Bacteria - 0; Metazoa - 0; Fungi - 1…	0	1	TAIR10	16887404	16889155	+	0	1	0
1	16890835	16891591	MACS_peak_679	70.16	---	---	---	---	---	---	---	---	---	---	---	0	1	0
1	16916120	16919129	MACS_peak_680	189.14	AT1G44800	protein_coding_gene	nodulin MtN21 /EamA-like transporter family protein	Encodes Siliques Are Red 1 (SIAR1). Functions as a bidirectional amino acid transporter that is crucial for the amino acid homeostasis of siliques. Member of nodulin MtN21-like transporter family.	nodulin MtN21 /EamA-like transporter family protein; FUNCTIONS IN: molecular_function unknown; LOCATED IN: membrane; EXPRESSED IN: 22 plant structures; EXPRESSED DURING: 11 growth stages; CONTAINS InterPro DOMAIN/s: Protein of unknown function DUF6, transmembrane (InterPro:IPR000620); BEST Arabidopsis thaliana protein match is: nodulin MtN21 /EamA-like transporter family protein (TAIR:AT4G08300.1…	0	1	TAIR10	16914009	16916997	-	0	0	0
1	16933673	16934584	MACS_peak_681	106.01	AT1G44830	protein_coding_gene	Integrase-type DNA-binding superfamily protein	encodes a member of the DREB subfamily A-5 of ERF/AP2 transcription factor family. The protein contains one AP2 domain. There are 15 members in this subfamily including RAP2.1, RAP2.9 and RAP2.10. Overexpression in cultured cells results in an increase in pectin deposition.	Integrase-type DNA-binding superfamily protein; FUNCTIONS IN: DNA binding, sequence-specific DNA binding transcription factor activity; INVOLVED IN: regulation of transcription, DNA-dependent; LOCATED IN: nucleus, chloroplast; EXPRESSED IN: 21 plant structures; EXPRESSED DURING: 10 growth stages; CONTAINS InterPro DOMAIN/s: DNA-binding, integrase-type (InterPro:IPR016177), Pathogenesis-related tr…	0	1	TAIR10	16933792	16934511	+	0	1	0
1	16965016	16965853	MACS_peak_682	81.09	---	---	---	---	---	---	---	---	---	---	---	0	0	0
1	16968339	16969119	MACS_peak_683	66.43	---	---	---	---	---	---	---	---	---	---	---	0	0	0
1	16990025	16992943	MACS_peak_684	239.3	---	---	---	---	---	---	---	---	---	---	---	1	1	0
1	17033915	17035078	MACS_peak_685	160.39	AT1G45063	protein_coding_gene	copper ion binding;electron carriers	---	copper ion binding;electron carriers; FUNCTIONS IN: electron carrier activity, copper ion binding; LOCATED IN: endomembrane system; CONTAINS InterPro DOMAIN/s: Plastocyanin-like (InterPro:IPR003245), Cupredoxin (InterPro:IPR008972), RNA-directed DNA polymerase (reverse transcriptase), related (InterPro:IPR015706); BEST Arabidopsis thaliana protein match is: plastocyanin-like domain-containing pro…	0	1	TAIR10	17033335	17035105	-	1	0	0
1	17050363	17052447	MACS_peak_686	771.32	AT1G45100	protein_coding_gene	RNA-binding (RRM/RBD/RNP motifs) family protein	---	RNA-binding (RRM/RBD/RNP motifs) family protein; FUNCTIONS IN: RNA binding, nucleotide binding, nucleic acid binding; CONTAINS InterPro DOMAIN/s: RNA recognition motif, RNP-1 (InterPro:IPR000504), Nucleotide-binding, alpha-beta plait (InterPro:IPR012677); BEST Arabidopsis thaliana protein match is: RNA-binding (RRM/RBD/RNP motifs) family protein (TAIR:AT5G41690.1); Has 8161 Blast hits to 6227 pro…	0	1	TAIR10	17050631	17052189	+	0	1	1
1	17074942	17076390	MACS_peak_687	266.27	AT1G45145	protein_coding_gene	thioredoxin H-type 5	encodes a cytosolic thioredoxin that reduces disulfide bridges of target proteins by the reversible formation of a disulfide bridge between two neighboring Cys residues present in the active site. Thioredoxins have been found to regulate a variety of biological reactions in prokaryotic and eukaryotic cells.	thioredoxin H-type 5 (TRX5); FUNCTIONS IN: oxidoreductase activity, acting on sulfur group of donors, disulfide as acceptor; INVOLVED IN: response to oxidative stress, response to cadmium ion, defense response to fungus, response to microbial phytotoxin; LOCATED IN: cytosol, plasma membrane; EXPRESSED IN: 25 plant structures; EXPRESSED DURING: 15 growth stages; CONTAINS InterPro DOMAIN/s: Thiored…	0	1	TAIR10	17074942	17076330	-	0	1	0
1	17123208	17125251	MACS_peak_688	178.25	AT1G45201	protein_coding_gene	triacylglycerol lipase-like 1	Target of AtGRP7 regulation.	triacylglycerol lipase-like 1 (TLL1); FUNCTIONS IN: triglyceride lipase activity; INVOLVED IN: circadian rhythm, lipid metabolic process; LOCATED IN: vacuole, membrane; EXPRESSED IN: guard cell, leaf; CONTAINS InterPro DOMAIN/s: Lipase, class 3 (InterPro:IPR002921); BEST Arabidopsis thaliana protein match is: alpha/beta-Hydrolases superfamily protein (TAIR:AT5G42930.1); Has 1640 Blast hits to 163…	0	1	TAIR10	17123821	17128651	+	0	0	0
1	17126423	17127796	MACS_peak_689	75.75	AT1G45201	protein_coding_gene	triacylglycerol lipase-like 1	Target of AtGRP7 regulation.	triacylglycerol lipase-like 1 (TLL1); FUNCTIONS IN: triglyceride lipase activity; INVOLVED IN: circadian rhythm, lipid metabolic process; LOCATED IN: vacuole, membrane; EXPRESSED IN: guard cell, leaf; CONTAINS InterPro DOMAIN/s: Lipase, class 3 (InterPro:IPR002921); BEST Arabidopsis thaliana protein match is: alpha/beta-Hydrolases superfamily protein (TAIR:AT5G42930.1); Has 1640 Blast hits to 163…	0	1	TAIR10	17123821	17128651	+	0	0	0
1	17224582	17226364	MACS_peak_690	103.7	AT1G46264	protein_coding_gene	heat shock transcription factor B4	Encodes SCHIZORIZA, a member of Heat Shock Transcription Factor (Hsf) family. Functions as a nuclear factor regulating asymmetry of stem cell divisions.	heat shock transcription factor B4 (HSFB4); FUNCTIONS IN: DNA binding, sequence-specific DNA binding transcription factor activity; INVOLVED IN: asymmetric cell division; LOCATED IN: nucleus; EXPRESSED IN: 17 plant structures; EXPRESSED DURING: 8 growth stages; CONTAINS InterPro DOMAIN/s: Winged helix-turn-helix transcription repressor DNA-binding (InterPro:IPR011991), Heat shock factor (HSF)-typ…	0	1	TAIR10	17224842	17226280	+	0	1	0
1	17230823	17232703	MACS_peak_691	79.57	AT1G46408	protein_coding_gene	AGAMOUS-like 97	---	AGAMOUS-like 97 (AGL97); FUNCTIONS IN: DNA binding, sequence-specific DNA binding transcription factor activity; INVOLVED IN: N-terminal protein myristoylation, regulation of transcription, DNA-dependent; LOCATED IN: nucleus; CONTAINS InterPro DOMAIN/s: Transcription factor, MADS-box (InterPro:IPR002100); BEST Arabidopsis thaliana protein match is: AGAMOUS-like 99 (TAIR:AT5G04640.1); Has 4542 Bla…	0	1	TAIR10	17232135	17232935	-	0	1	0
1	17236415	17239438	MACS_peak_692	376.29	AT1G46480	protein_coding_gene	WUSCHEL related homeobox 4	Encodes a WUSCHEL-related homeobox gene family member with 65 amino acids in its homeodomain. Proteins in this family contain a sequence of eight residues (TLPLFPMH) downstream of the homeodomain called the WUS box. This protein also contains an acidic domain approximately 10 residues upstream of the WUS box. Part of the TDIF-TDR-WOX4 signaling pathway that plays a crucial role in the maintenance…	WUSCHEL related homeobox 4 (WOX4); CONTAINS InterPro DOMAIN/s: Homeobox (InterPro:IPR001356), Homeodomain-like (InterPro:IPR009057); BEST Arabidopsis thaliana protein match is: WUSCHEL related homeobox 1 (TAIR:AT3G18010.1); Has 537 Blast hits to 535 proteins in 47 species: Archae - 0; Bacteria - 0; Metazoa - 0; Fungi - 0; Plants - 537; Viruses - 0; Other Eukaryotes - 0 (source: NCBI BLink).	0	1	TAIR10	17236678	17238053	-	0	2	0
1	17249119	17251992	MACS_peak_693	244.95	AT1G46554	other_RNA	other RNA	---	---	-960	1	TAIR10	17252952	17253903	+	1	0	0
1	17269797	17272101	MACS_peak_694	358.67	AT1G46840	protein_coding_gene	F-box family protein	---	F-box family protein; CONTAINS InterPro DOMAIN/s: F-box domain, cyclin-like (InterPro:IPR001810), F-box domain, Skp2-like (InterPro:IPR022364), F-box associated domain, type 3 (InterPro:IPR013187), F-box associated interaction domain (InterPro:IPR017451); BEST Arabidopsis thaliana protein match is: F-box family protein (TAIR:AT1G46984.1); Has 1463 Blast hits to 1399 proteins in 43 species: Archae…	0	1	TAIR10	17270185	17271706	+	1	1	0
1	17279094	17280195	MACS_peak_695	281.15	---	---	---	---	---	---	---	---	---	---	---	0	1	0
1	17339787	17341267	MACS_peak_696	233.82	AT1G47300	protein_coding_gene	F-box family protein	---	F-box family protein; CONTAINS InterPro DOMAIN/s: F-box domain, cyclin-like (InterPro:IPR001810), F-box domain, Skp2-like (InterPro:IPR022364); BEST Arabidopsis thaliana protein match is: F-box and associated interaction domains-containing protein (TAIR:AT1G47340.1); Has 59778 Blast hits to 14921 proteins in 727 species: Archae - 194; Bacteria - 1073; Metazoa - 27367; Fungi - 4962; Plants - 3675;…	0	1	TAIR10	17339561	17340972	-	0	0	0
1	17347835	17348843	MACS_peak_697	58	---	---	---	---	---	---	---	---	---	---	---	0	0	0
1	17348938	17350197	MACS_peak_698	116.31	AT1G47330	protein_coding_gene	CBS domain-containing protein with a domain of unknown function (DUF21)	---	FUNCTIONS IN: molecular_function unknown; INVOLVED IN: biological_process unknown; LOCATED IN: plasma membrane; EXPRESSED IN: 22 plant structures; EXPRESSED DURING: 13 growth stages; CONTAINS InterPro DOMAIN/s: Protein of unknown function DUF21 (InterPro:IPR002550), Cystathionine beta-synthase, core (InterPro:IPR000644); BEST Arabidopsis thaliana protein match is: CBS domain-containing protein wi…	-853	1	TAIR10	17351050	17353875	+	0	0	0
1	17357078	17361034	MACS_peak_699	459.39	AT1G47350	protein_coding_gene	F-box associated ubiquitination effector family protein	---	F-box associated ubiquitination effector family protein; CONTAINS InterPro DOMAIN/s: F-box associated domain, type 3 (InterPro:IPR013187), F-box associated interaction domain (InterPro:IPR017451); BEST Arabidopsis thaliana protein match is: F-box and associated interaction domains-containing protein (TAIR:AT1G47340.1); Has 838 Blast hits to 807 proteins in 14 species: Archae - 0; Bacteria - 0; Me…	0	1	TAIR10	17358447	17360722	-	1	2	0
1	17367586	17369529	MACS_peak_700	219.24	AT1G47370	protein_coding_gene	Toll-Interleukin-Resistance (TIR) domain family protein	---	Toll-Interleukin-Resistance (TIR) domain family protein; FUNCTIONS IN: transmembrane receptor activity; INVOLVED IN: signal transduction, defense response, innate immune response; LOCATED IN: intrinsic to membrane; CONTAINS InterPro DOMAIN/s: Toll-Interleukin receptor (InterPro:IPR000157); BEST Arabidopsis thaliana protein match is: Toll-Interleukin-Resistance (TIR) domain family protein (TAIR:AT…	0	1	TAIR10	17365898	17368703	-	0	1	0
1	17369929	17371933	MACS_peak_701	154.52	---	---	---	---	---	---	---	---	---	---	---	0	0	0
1	17378142	17380731	MACS_peak_702	344.37	AT1G47390	protein_coding_gene	F-box and associated interaction domains-containing protein	---	F-box and associated interaction domains-containing protein; CONTAINS InterPro DOMAIN/s: F-box domain, cyclin-like (InterPro:IPR001810), F-box domain, Skp2-like (InterPro:IPR022364), F-box associated domain, type 1 (InterPro:IPR006527), F-box associated interaction domain (InterPro:IPR017451); BEST Arabidopsis thaliana protein match is: F-box and associated interaction domains-containing protein …	0	1	TAIR10	17379544	17380656	+	1	1	0
1	17397497	17398286	MACS_peak_703	80.23	AT1G47420	protein_coding_gene	succinate dehydrogenase 5	predicted to encode subunit 5 of mitochondrial complex II and to participate in the respiratory chain	succinate dehydrogenase 5 (SDH5); FUNCTIONS IN: molecular_function unknown; INVOLVED IN: biological_process unknown; LOCATED IN: mitochondrion, nucleus; EXPRESSED IN: 26 plant structures; EXPRESSED DURING: 15 growth stages; BEST Arabidopsis thaliana protein match is: gamma carbonic anhydrase 2 (TAIR:AT1G47260.1); Has 145 Blast hits to 145 proteins in 25 species: Archae - 0; Bacteria - 0; Metazoa …	-243	1	TAIR10	17395518	17397255	-	0	0	0
1	17418343	17419586	MACS_peak_704	71.47	AT1G47480	protein_coding_gene	alpha/beta-Hydrolases superfamily protein	---	alpha/beta-Hydrolases superfamily protein; FUNCTIONS IN: hydrolase activity; INVOLVED IN: metabolic process; LOCATED IN: cellular_component unknown; EXPRESSED IN: stem, hypocotyl, root, flower; EXPRESSED DURING: petal differentiation and expansion stage; CONTAINS InterPro DOMAIN/s: Lipase, GDXG, active site (InterPro:IPR002168), Alpha/beta hydrolase fold-3 (InterPro:IPR013094); BEST Arabidopsis t…	0	1	TAIR10	17417579	17419432	+	0	0	0
1	17422189	17423301	MACS_peak_705	113.09	AT1G47485	protein_coding_gene	---	Encodes CEP1, a 15-amino-acid peptide, which is mainly expressed in the lateral root primordia. When overexpressed or externally applied, CEP1 arrests root growth. CEP1 is a candidate for a novel peptide plant hormone.	FUNCTIONS IN: molecular_function unknown; INVOLVED IN: root development, lateral root development; LOCATED IN: endomembrane system; EXPRESSED IN: shoot apical meristem, inflorescence meristem, flower, lateral root primordium; EXPRESSED DURING: petal differentiation and expansion stage; Has 10 Blast hits to 10 proteins in 3 species: Archae - 0; Bacteria - 0; Metazoa - 0; Fungi - 0; Plants - 10; Vi…	0	1	TAIR10	17422448	17423066	+	0	0	0
1	17437357	17438407	MACS_peak_706	102.66	AT1G47510	protein_coding_gene	inositol polyphosphate 5-phosphatase 11	Encodes a phosphatidylinositol polyphosphate 5-phosphatase. It can dephosphorylate PI(4,5)P2, PI(3,5)P2, and PI(3,4,5)P3, but, it is not active against PI(5)P or the water soluble inositol(1,4,5)P3 or inositol(1,3,4,5)P4. The transcript levels for this gene rise in response to auxin, ABA, and JA.	inositol polyphosphate 5-phosphatase 11 (5PTASE11); FUNCTIONS IN: hydrolase activity, phosphatidylinositol-3,4,5-trisphosphate 5-phosphatase activity, phosphatidylinositol-4,5-bisphosphate 5-phosphatase activity, phosphatidylinositol-3,5-bisphosphate 5-phosphatase activity; INVOLVED IN: response to jasmonic acid stimulus, response to auxin stimulus, N-terminal protein myristoylation, phosphoinosi…	0	1	TAIR10	17435565	17438396	-	0	0	0
1	17449782	17450912	MACS_peak_707	101.66	AT1G47530	protein_coding_gene	MATE efflux family protein	---	MATE efflux family protein; FUNCTIONS IN: antiporter activity, drug transmembrane transporter activity, transporter activity; INVOLVED IN: drug transmembrane transport, ripening, transmembrane transport; LOCATED IN: plasma membrane, membrane; EXPRESSED IN: 23 plant structures; EXPRESSED DURING: 13 growth stages; CONTAINS InterPro DOMAIN/s: Multi antimicrobial extrusion protein MatE (InterPro:IPR0…	-768	1	TAIR10	17451680	17454421	+	0	0	0
1	17455130	17456504	MACS_peak_708	205.5	AT1G47540	protein_coding_gene	Scorpion toxin-like knottin superfamily protein	---	Scorpion toxin-like knottin superfamily protein; FUNCTIONS IN: ion channel inhibitor activity; INVOLVED IN: defense response; LOCATED IN: endomembrane system, extracellular region; CONTAINS InterPro DOMAIN/s: Scorpion long chain toxin (InterPro:IPR002061), Knottin (InterPro:IPR003614); BEST Arabidopsis thaliana protein match is: trypsin inhibitor protein 2 (TAIR:AT2G43520.1); Has 146 Blast hits t…	0	1	TAIR10	17455533	17456170	-	0	0	0
1	17464588	17465482	MACS_peak_709	118.21	---	---	---	---	---	---	---	---	---	---	---	0	1	0
1	17504099	17506985	MACS_peak_710	154.74	AT1G47610	protein_coding_gene	Transducin/WD40 repeat-like superfamily protein	---	Transducin/WD40 repeat-like superfamily protein; CONTAINS InterPro DOMAIN/s: WD40 repeat 2 (InterPro:IPR019782), WD40 repeat, conserved site (InterPro:IPR019775), WD40 repeat (InterPro:IPR001680), G-protein beta WD-40 repeat, region (InterPro:IPR020472), WD40 repeat-like-containing domain (InterPro:IPR011046), WD40-repeat-containing domain (InterPro:IPR017986), WD40/YVTN repeat-like-containing do…	0	1	TAIR10	17504783	17505964	+	0	1	1
1	17563670	17565531	MACS_peak_711	918.2	AT1G47730	protein_coding_gene	F-box and associated interaction domains-containing protein	---	F-box and associated interaction domains-containing protein; FUNCTIONS IN: molecular_function unknown; INVOLVED IN: biological_process unknown; LOCATED IN: chloroplast; CONTAINS InterPro DOMAIN/s: F-box domain, cyclin-like (InterPro:IPR001810), F-box domain, Skp2-like (InterPro:IPR022364), F-box associated domain, type 3 (InterPro:IPR013187), F-box associated interaction domain (InterPro:IPR01745…	0	1	TAIR10	17563931	17565106	-	0	1	0
1	17597583	17603088	MACS_peak_712	76.79	AT1G47800	protein_coding_gene	F-box and associated interaction domains-containing protein	---	F-box and associated interaction domains-containing protein; CONTAINS InterPro DOMAIN/s: F-box domain, cyclin-like (InterPro:IPR001810), F-box domain, Skp2-like (InterPro:IPR022364), F-box associated domain, type 3 (InterPro:IPR013187), F-box associated interaction domain (InterPro:IPR017451); BEST Arabidopsis thaliana protein match is: F-box and associated interaction domains-containing protein …	0	1	TAIR10	17601513	17602676	+	4	0	0
1	17627433	17628745	MACS_peak_713	253.71	---	---	---	---	---	---	---	---	---	---	---	0	0	1
1	17629142	17630746	MACS_peak_714	318.57	---	---	---	---	---	---	---	---	---	---	---	0	0	0
1	17642204	17643002	MACS_peak_715	158.63	AT1G47885	protein_coding_gene	Ribonuclease inhibitor	---	Ribonuclease inhibitor; BEST Arabidopsis thaliana protein match is: receptor like protein 7 (TAIR:AT1G47890.1); Has 1846 Blast hits to 1586 proteins in 59 species: Archae - 0; Bacteria - 4; Metazoa - 1; Fungi - 0; Plants - 1826; Viruses - 0; Other Eukaryotes - 15 (source: NCBI BLink).	0	1	TAIR10	17642397	17642805	-	0	0	0
1	17660481	17662002	MACS_peak_716	175.76	AT1G47920	protein_coding_gene	RNI-like superfamily protein	---	RNI-like superfamily protein; CONTAINS InterPro DOMAIN/s: FBD-like (InterPro:IPR006566), Leucine-rich repeat 2 (InterPro:IPR013101); BEST Arabidopsis thaliana protein match is: F-box/RNI-like/FBD-like domains-containing protein (TAIR:AT1G48400.1); Has 444 Blast hits to 433 proteins in 4 species: Archae - 0; Bacteria - 0; Metazoa - 0; Fungi - 0; Plants - 444; Viruses - 0; Other Eukaryotes - 0 (sou…	0	1	TAIR10	17661095	17662394	+	0	0	0
1	17691676	17692535	MACS_peak_717	127.9	AT1G47980	protein_coding_gene	---	---	unknown protein; FUNCTIONS IN: molecular_function unknown; INVOLVED IN: biological_process unknown; LOCATED IN: endomembrane system; EXPRESSED IN: 6 plant structures; EXPRESSED DURING: 4 anthesis, F mature embryo stage, petal differentiation and expansion stage, E expanded cotyledon stage; BEST Arabidopsis thaliana protein match is: unknown protein (TAIR:AT3G62730.1); Has 169 Blast hits to 169 pr…	0	1	TAIR10	17691834	17693867	-	0	1	0
1	17692607	17694502	MACS_peak_718	170.35	AT1G47980	protein_coding_gene	---	---	unknown protein; FUNCTIONS IN: molecular_function unknown; INVOLVED IN: biological_process unknown; LOCATED IN: endomembrane system; EXPRESSED IN: 6 plant structures; EXPRESSED DURING: 4 anthesis, F mature embryo stage, petal differentiation and expansion stage, E expanded cotyledon stage; BEST Arabidopsis thaliana protein match is: unknown protein (TAIR:AT3G62730.1); Has 169 Blast hits to 169 pr…	0	1	TAIR10	17691834	17693867	-	0	2	0
1	17696821	17699480	MACS_peak_719	60.36	AT1G47990	protein_coding_gene	gibberellin 2-oxidase 4	Encodes a gibberellin 2-oxidase that acts on C19 gibberellins. AtGA2OX4 expression is responsive to cytokinin and KNOX activities.	gibberellin 2-oxidase 4 (GA2OX4); FUNCTIONS IN: C-19 gibberellin 2-beta-dioxygenase activity; INVOLVED IN: gibberellin catabolic process; LOCATED IN: membrane; EXPRESSED IN: shoot apical meristem, leaf primordium, leaf; CONTAINS InterPro DOMAIN/s: Isopenicillin N synthase (InterPro:IPR002283), Oxoglutarate/iron-dependent oxygenase (InterPro:IPR005123); BEST Arabidopsis thaliana protein match is: …	0	1	TAIR10	17698655	17700834	+	0	0	0
1	17703970	17706727	MACS_peak_720	177.91	AT1G48000	protein_coding_gene	myb domain protein 112	Encodes a putative transcription factor (MYB112).	myb domain protein 112 (MYB112); CONTAINS InterPro DOMAIN/s: SANT, DNA-binding (InterPro:IPR001005), Homeodomain-like (InterPro:IPR009057), Myb, DNA-binding (InterPro:IPR014778), HTH transcriptional regulator, Myb-type, DNA-binding (InterPro:IPR017930), Homeodomain-related (InterPro:IPR012287), Myb transcription factor (InterPro:IPR015495); BEST Arabidopsis thaliana protein match is: myb domain p…	0	1	TAIR10	17704179	17706460	-	0	0	0
1	17730091	17731309	MACS_peak_721	216.58	AT1G48070	protein_coding_gene	Thioredoxin superfamily protein	---	Thioredoxin superfamily protein; CONTAINS InterPro DOMAIN/s: Thioredoxin fold (InterPro:IPR012335), Thioredoxin, core (InterPro:IPR015467), Thioredoxin-like fold (InterPro:IPR012336); Has 17 Blast hits to 17 proteins in 7 species: Archae - 0; Bacteria - 8; Metazoa - 0; Fungi - 0; Plants - 7; Viruses - 0; Other Eukaryotes - 2 (source: NCBI BLink).	0	1	TAIR10	17730417	17731122	-	0	0	0
1	17780120	17781916	MACS_peak_722	1031.83	AT1G48130	protein_coding_gene	1-cysteine peroxiredoxin 1	encodes a protein similar to the 1-cysteine (1-Cys) peroxiredoxin family of antioxidants. Expression is limited to seed (aleurone and embryo) and is not induced by ABA or drought.	1-cysteine peroxiredoxin 1 (PER1); FUNCTIONS IN: thioredoxin peroxidase activity, antioxidant activity; INVOLVED IN: maintenance of seed dormancy, response to desiccation; LOCATED IN: cellular_component unknown; EXPRESSED IN: embryo, aleurone layer, seed; EXPRESSED DURING: seed development stages; CONTAINS InterPro DOMAIN/s: Peroxiredoxin, C-terminal (InterPro:IPR019479), Thioredoxin fold (InterP…	0	1	TAIR10	17780502	17781727	+	0	1	1
1	17794730	17795940	MACS_peak_723	239.47	AT1G48190	protein_coding_gene	Galactose oxidase/kelch repeat superfamily protein	---	Galactose oxidase/kelch repeat superfamily protein; CONTAINS InterPro DOMAIN/s: Galactose oxidase/kelch, beta-propeller (InterPro:IPR011043), Kelch-type beta propeller (InterPro:IPR015915); BEST Arabidopsis thaliana protein match is: Galactose oxidase/kelch repeat superfamily protein (TAIR:AT4G39580.1); Has 148 Blast hits to 148 proteins in 3 species: Archae - 0; Bacteria - 0; Metazoa - 0; Fungi …	0	1	TAIR10	17794560	17795163	-	0	0	0
1	17818431	17819331	MACS_peak_724	140.54	---	---	---	---	---	---	---	---	---	---	---	0	1	0
1	17832662	17833718	MACS_peak_725	101.66	---	---	---	---	---	---	---	---	---	---	---	1	0	0
1	17857068	17857937	MACS_peak_726	57.58	AT1G48325	protein_coding_gene	Expressed protein	---	Expressed protein; BEST Arabidopsis thaliana protein match is: unknown protein (TAIR:AT3G05858.1); Has 35333 Blast hits to 34131 proteins in 2444 species: Archae - 798; Bacteria - 22429; Metazoa - 974; Fungi - 991; Plants - 531; Viruses - 0; Other Eukaryotes - 9610 (source: NCBI BLink).	0	1	TAIR10	17857271	17857722	+	1	0	0
1	17884336	17885403	MACS_peak_727	91.97	AT1G48405	protein_coding_gene	Kinase interacting (KIP1-like) family protein	---	Kinase interacting (KIP1-like) family protein; CONTAINS InterPro DOMAIN/s: KIP1-like (InterPro:IPR011684); BEST Arabidopsis thaliana protein match is: Kinase interacting (KIP1-like) family protein (TAIR:AT3G17680.1); Has 200 Blast hits to 198 proteins in 54 species: Archae - 0; Bacteria - 36; Metazoa - 14; Fungi - 10; Plants - 112; Viruses - 0; Other Eukaryotes - 28 (source: NCBI BLink).	0	1	TAIR10	17884645	17885614	-	0	0	0
1	17892890	17894624	MACS_peak_728	251.89	AT1G48410	protein_coding_gene	Stabilizer of iron transporter SufD / Polynucleotidyl transferase	Encodes an RNA Slicer that selectively recruits microRNAs and siRNAs. There is currently no evidence that AGO1 Slicer is in a high molecular weight RNA-induced silencing complex (RISC). Mutants are defective in post-transcriptional gene silencing and have pleiotropic developmental and morphological defects. Through its action on the regulation of ARF17 expression, the protein regulates genes invo…	ARGONAUTE 1 (AGO1); FUNCTIONS IN: protein binding, endoribonuclease activity, siRNA binding, miRNA binding; INVOLVED IN: in 11 processes; LOCATED IN: cytosol, nucleus, cytoplasm; EXPRESSED IN: 25 plant structures; EXPRESSED DURING: 13 growth stages; CONTAINS InterPro DOMAIN/s: Domain of unknown function DUF1785 (InterPro:IPR014811), Stem cell self-renewal protein Piwi (InterPro:IPR003165), Argona…	-295	1	TAIR10	17885633	17892596	-	0	0	0
1	17915520	17916419	MACS_peak_729	53.79	AT1G48470	protein_coding_gene	glutamine synthetase 1;5	Encodes cytosolic glutamine synthase isozyme. Expression of mRNA is not detectable in roots.	glutamine synthetase 1;5 (GLN1;5); FUNCTIONS IN: glutamate-ammonia ligase activity; INVOLVED IN: nitrogen compound metabolic process, glutamine biosynthetic process; LOCATED IN: chloroplast; EXPRESSED IN: 10 plant structures; EXPRESSED DURING: L mature pollen stage, 4 anthesis, petal differentiation and expansion stage, E expanded cotyledon stage; CONTAINS InterPro DOMAIN/s: Glutamine synthetase,…	0	1	TAIR10	17913711	17916098	+	0	0	0
1	17935615	17936622	MACS_peak_730	76.37	AT1G48510	protein_coding_gene	Surfeit locus 1 cytochrome c oxidase biogenesis protein	---	Surfeit locus 1 cytochrome c oxidase biogenesis protein; CONTAINS InterPro DOMAIN/s: Surfeit locus 1 (InterPro:IPR002994); BEST Arabidopsis thaliana protein match is: Surfeit locus 1 cytochrome c oxidase biogenesis protein (TAIR:AT3G17910.1); Has 339 Blast hits to 337 proteins in 81 species: Archae - 0; Bacteria - 17; Metazoa - 64; Fungi - 36; Plants - 44; Viruses - 0; Other Eukaryotes - 178 (sou…	0	1	TAIR10	17934829	17936915	+	1	0	0
1	17962768	17964758	MACS_peak_731	371.03	AT1G48590	protein_coding_gene	Calcium-dependent lipid-binding (CaLB domain) family protein	---	Calcium-dependent lipid-binding (CaLB domain) family protein; CONTAINS InterPro DOMAIN/s: C2 membrane targeting protein (InterPro:IPR018029), C2 calcium/lipid-binding domain, CaLB (InterPro:IPR008973), C2 region (InterPro:IPR020477), C2 calcium-dependent membrane targeting (InterPro:IPR000008); BEST Arabidopsis thaliana protein match is: Calcium-dependent lipid-binding (CaLB domain) family protei…	0	1	TAIR10	17962580	17964429	+	0	2	0
1	17995944	17997345	MACS_peak_732	154.55	AT1G48660	protein_coding_gene	Auxin-responsive GH3 family protein	---	Auxin-responsive GH3 family protein; CONTAINS InterPro DOMAIN/s: GH3 auxin-responsive promoter (InterPro:IPR004993); BEST Arabidopsis thaliana protein match is: auxin-responsive GH3 family protein (TAIR:AT1G48670.1); Has 1415 Blast hits to 1338 proteins in 229 species: Archae - 0; Bacteria - 452; Metazoa - 52; Fungi - 2; Plants - 674; Viruses - 0; Other Eukaryotes - 235 (source: NCBI BLink).	0	1	TAIR10	17995948	17997972	-	0	0	0
1	18010529	18011907	MACS_peak_733	78.03	AT1G48700	protein_coding_gene	2-oxoglutarate (2OG) and Fe(II)-dependent oxygenase superfamily protein	---	2-oxoglutarate (2OG) and Fe(II)-dependent oxygenase superfamily protein; FUNCTIONS IN: oxidoreductase activity, acting on paired donors, with incorporation or reduction of molecular oxygen, L-ascorbic acid binding, iron ion binding; INVOLVED IN: oxidation reduction; LOCATED IN: cellular_component unknown; CONTAINS InterPro DOMAIN/s: Prolyl 4-hydroxylase, alpha subunit (InterPro:IPR006620); BEST A…	0	1	TAIR10	18011035	18012871	-	0	0	0
1	18020153	18020749	MACS_peak_734	56.8	AT1G48730	protein_coding_gene	---	---	unknown protein; Has 1 Blast hits to 1 proteins in 1 species: Archae - 0; Bacteria - 0; Metazoa - 0; Fungi - 0; Plants - 1; Viruses - 0; Other Eukaryotes - 0 (source: NCBI BLink).	0	1	TAIR10	18020337	18022277	-	0	0	0
1	18021339	18022754	MACS_peak_735	123.72	AT1G48730	protein_coding_gene	---	---	unknown protein; Has 1 Blast hits to 1 proteins in 1 species: Archae - 0; Bacteria - 0; Metazoa - 0; Fungi - 0; Plants - 1; Viruses - 0; Other Eukaryotes - 0 (source: NCBI BLink).	0	1	TAIR10	18020337	18022277	-	0	1	0
1	18026039	18028026	MACS_peak_736	378.86	AT1G48742	miRNA	MIR157D; miRNA	Encodes a microRNA that targets several SPL family members, including SPL3,4, and 5. By regulating the expression of SPL3 (and probably also SPL4 and SPL5), this microRNA regulates vegetative phase change. MicroRNAs are regulatory RNAs with a mature length of ~21-nucleotides that are processed from hairpin precursors by Dicer-like enzymes. MicroRNAs can negatively regulate gene expression by atte…	---	0	1	TAIR10	18026838	18027009	-	0	1	0
1	18031833	18033504	MACS_peak_737	128.54	---	---	---	---	---	---	---	---	---	---	---	0	0	0
1	18049476	18053300	MACS_peak_738	234.51	AT1G48800	protein_coding_gene	Terpenoid cyclases/Protein prenyltransferases superfamily protein	---	Terpenoid cyclases/Protein prenyltransferases superfamily protein; FUNCTIONS IN: lyase activity, magnesium ion binding; INVOLVED IN: metabolic process; CONTAINS InterPro DOMAIN/s: Terpene synthase, metal-binding domain (InterPro:IPR005630), Terpenoid synthase (InterPro:IPR008949), Terpenoid cylases/protein prenyltransferase alpha-alpha toroid (InterPro:IPR008930), Terpene synthase-like (InterPro:…	0	1	TAIR10	18049844	18052975	+	0	0	0
1	18056756	18057715	MACS_peak_739	85.3	AT1G48820	protein_coding_gene	Terpenoid cyclases/Protein prenyltransferases superfamily protein	---	Terpenoid cyclases/Protein prenyltransferases superfamily protein; FUNCTIONS IN: lyase activity, magnesium ion binding; INVOLVED IN: metabolic process; EXPRESSED IN: leaf whorl, flower, seed; EXPRESSED DURING: F mature embryo stage, petal differentiation and expansion stage; CONTAINS InterPro DOMAIN/s: Terpene synthase, metal-binding domain (InterPro:IPR005630), Terpenoid synthase (InterPro:IPR00…	0	1	TAIR10	18055229	18059367	+	0	0	0
1	18091079	18093969	MACS_peak_740	529.05	AT1G48910	protein_coding_gene	Flavin-containing monooxygenase family protein	A paternally expressed imprinted gene.	YUC10; FUNCTIONS IN: NADP or NADPH binding, oxidoreductase activity, monooxygenase activity, FAD binding, flavin-containing monooxygenase activity; INVOLVED IN: regulation of anatomical structure morphogenesis; LOCATED IN: cellular_component unknown; EXPRESSED IN: sperm cell; CONTAINS InterPro DOMAIN/s: Pyridine nucleotide-disulphide oxidoreductase, class-II (InterPro:IPR000103), FAD-dependent py…	0	1	TAIR10	18091681	18093774	+	1	0	0
1	18120626	18122366	MACS_peak_741	443.27	AT1G48990	protein_coding_gene	Oleosin family protein	---	Oleosin family protein; FUNCTIONS IN: molecular_function unknown; INVOLVED IN: lipid storage; LOCATED IN: monolayer-surrounded lipid storage body, integral to membrane, membrane; CONTAINS InterPro DOMAIN/s: Oleosin (InterPro:IPR000136); BEST Arabidopsis thaliana protein match is: Oleosin family protein (TAIR:AT3G18570.1); Has 346 Blast hits to 346 proteins in 48 species: Archae - 0; Bacteria - 0;…	0	1	TAIR10	18121434	18122155	+	0	1	1
1	18128263	18130621	MACS_peak_742	181.12	AT1G49005	protein_coding_gene	CLAVATA3/ESR-RELATED 11	Member of a large family of putative ligands homologous to the Clavata3 gene. Consists of a single exon. Can partially replace CLV3 function in vivo.	CLAVATA3/ESR-RELATED 11 (CLE11); BEST Arabidopsis thaliana protein match is: CLAVATA3/ESR-RELATED 13 (TAIR:AT1G73965.1); Has 22 Blast hits to 22 proteins in 5 species: Archae - 0; Bacteria - 0; Metazoa - 0; Fungi - 0; Plants - 22; Viruses - 0; Other Eukaryotes - 0 (source: NCBI BLink).	0	1	TAIR10	18128686	18131522	-	0	1	0
1	18135909	18137739	MACS_peak_743	432.07	AT1G49030	protein_coding_gene	PLAC8 family protein	---	PLAC8 family protein; CONTAINS InterPro DOMAIN/s: Protein of unknown function Cys-rich (InterPro:IPR006461); BEST Arabidopsis thaliana protein match is: PLAC8 family protein (TAIR:AT3G18460.1); Has 749 Blast hits to 748 proteins in 94 species: Archae - 0; Bacteria - 0; Metazoa - 146; Fungi - 45; Plants - 538; Viruses - 0; Other Eukaryotes - 20 (source: NCBI BLink).	0	1	TAIR10	18136705	18137946	+	0	0	0
1	18167984	18170933	MACS_peak_744	143.82	AT1G49100	protein_coding_gene	Leucine-rich repeat protein kinase family protein	---	Leucine-rich repeat protein kinase family protein; FUNCTIONS IN: kinase activity; INVOLVED IN: protein amino acid phosphorylation; LOCATED IN: endomembrane system; CONTAINS InterPro DOMAIN/s: Protein kinase, ATP binding site (InterPro:IPR017441), Serine/threonine-protein kinase domain (InterPro:IPR002290), Leucine-rich repeat (InterPro:IPR001611), Serine-threonine/tyrosine-protein kinase (InterPr…	0	1	TAIR10	18166147	18170105	-	2	0	0
1	18188061	18194110	MACS_peak_745	343.34	AT1G49190	protein_coding_gene	response regulator 19	member of Response Regulator: B- Type	response regulator 19 (RR19); CONTAINS InterPro DOMAIN/s: Response regulator, plant B-type (InterPro:IPR017053), Myb-like DNA-binding domain, SHAQKYF class (InterPro:IPR006447), CheY-like (InterPro:IPR011006), Homeodomain-like (InterPro:IPR009057), Myb, DNA-binding (InterPro:IPR014778), Signal transduction response regulator, receiver domain (InterPro:IPR001789), Homeodomain-related (InterPro:IPR…	0	1	TAIR10	18191267	18193782	+	0	3	0
1	18232448	18233987	MACS_peak_746	211.55	AT1G49290	protein_coding_gene	---	---	unknown protein; BEST Arabidopsis thaliana protein match is: unknown protein (TAIR:AT5G13620.1); Has 99 Blast hits to 93 proteins in 11 species: Archae - 0; Bacteria - 0; Metazoa - 2; Fungi - 0; Plants - 97; Viruses - 0; Other Eukaryotes - 0 (source: NCBI BLink).	0	1	TAIR10	18232608	18233624	-	0	1	0
1	18237554	18240372	MACS_peak_747	131.58	AT1G49310	protein_coding_gene	---	---	unknown protein; FUNCTIONS IN: molecular_function unknown; INVOLVED IN: biological_process unknown; LOCATED IN: endomembrane system; EXPRESSED IN: 9 plant structures; EXPRESSED DURING: LP.04 four leaves visible, petal differentiation and expansion stage; Has 11 Blast hits to 11 proteins in 6 species: Archae - 0; Bacteria - 0; Metazoa - 0; Fungi - 0; Plants - 11; Viruses - 0; Other Eukaryotes - 0 …	0	1	TAIR10	18237863	18238367	-	1	2	0
1	18240535	18242421	MACS_peak_748	56.4	---	---	---	---	---	---	---	---	---	---	---	0	0	0
1	18246070	18248785	MACS_peak_749	88.99	AT1G49320	protein_coding_gene	unknown seed protein like 1	Encodes USPL1, a BURP domain protein targeted to the protein storage vacuoles. Overexpression of USPL1 affects seed development, protein storage vacuoles and lipid vesicles morphology and function.	unknown seed protein like 1 (USPL1); CONTAINS InterPro DOMAIN/s: BURP (InterPro:IPR004873); BEST Arabidopsis thaliana protein match is: BURP domain-containing protein (TAIR:AT5G25610.1); Has 493 Blast hits to 491 proteins in 39 species: Archae - 0; Bacteria - 0; Metazoa - 0; Fungi - 0; Plants - 493; Viruses - 0; Other Eukaryotes - 0 (source: NCBI BLink).	0	1	TAIR10	18246305	18247992	+	0	0	0
1	18249580	18251414	MACS_peak_750	478.34	AT1G49330	protein_coding_gene	hydroxyproline-rich glycoprotein family protein	---	hydroxyproline-rich glycoprotein family protein; BEST Arabidopsis thaliana protein match is: unknown protein (TAIR:AT2G16190.1); Has 882 Blast hits to 731 proteins in 140 species: Archae - 0; Bacteria - 49; Metazoa - 218; Fungi - 71; Plants - 381; Viruses - 66; Other Eukaryotes - 97 (source: NCBI BLink).	0	1	TAIR10	18250043	18251038	+	0	1	1
1	18290812	18292228	MACS_peak_751	111.62	AT1G49430	protein_coding_gene	long-chain acyl-CoA synthetase 2	Encodes a long chain acyl-CoA synthetase that catalyzes the synthesis of omega-hydroxy fatty acyl-CoA intermediates in the pathway to cutin synthesis. Required for repression of lateral root formation.	long-chain acyl-CoA synthetase 2 (LACS2); CONTAINS InterPro DOMAIN/s: AMP-binding, conserved site (InterPro:IPR020845), AMP-dependent synthetase/ligase (InterPro:IPR000873); BEST Arabidopsis thaliana protein match is: AMP-dependent synthetase and ligase family protein (TAIR:AT1G64400.1); Has 53337 Blast hits to 50359 proteins in 3209 species: Archae - 917; Bacteria - 34261; Metazoa - 2388; Fungi …	0	1	TAIR10	18291043	18295825	+	0	0	0
1	18305500	18306545	MACS_peak_752	345.12	AT1G49450	protein_coding_gene	Transducin/WD40 repeat-like superfamily protein	---	Transducin/WD40 repeat-like superfamily protein; CONTAINS InterPro DOMAIN/s: WD40 repeat 2 (InterPro:IPR019782), WD40 repeat-like-containing domain (InterPro:IPR011046), WD40-repeat-containing domain (InterPro:IPR017986), WD40/YVTN repeat-like-containing domain (InterPro:IPR015943), WD40 repeat (InterPro:IPR001680), WD40 repeat, subgroup (InterPro:IPR019781), G-protein beta WD-40 repeat, region (…	0	1	TAIR10	18305541	18307557	+	0	1	1
1	18310214	18311885	MACS_peak_753	220.11	AT1G49470	protein_coding_gene	Family of unknown function (DUF716)	---	Family of unknown function (DUF716) ; FUNCTIONS IN: molecular_function unknown; INVOLVED IN: biological_process unknown; LOCATED IN: endomembrane system; EXPRESSED IN: 20 plant structures; EXPRESSED DURING: 10 growth stages; CONTAINS InterPro DOMAIN/s: Protein of unknown function DUF716 (InterPro:IPR006904); BEST Arabidopsis thaliana protein match is: Family of unknown function (DUF716) (TAIR:AT1…	0	1	TAIR10	18310494	18311634	+	1	1	1
1	18345336	18346855	MACS_peak_754	56.71	AT1G49570	protein_coding_gene	Peroxidase superfamily protein	---	Peroxidase superfamily protein; FUNCTIONS IN: peroxidase activity, heme binding; INVOLVED IN: oxidation reduction, response to oxidative stress; LOCATED IN: endomembrane system; EXPRESSED IN: leaf lamina base, leaf whorl, hypocotyl, sepal, root; EXPRESSED DURING: 4 anthesis; CONTAINS InterPro DOMAIN/s: Haem peroxidase (InterPro:IPR010255), Plant peroxidase (InterPro:IPR000823), Peroxidases heam-l…	-181	1	TAIR10	18347036	18348951	+	1	0	0
1	18347526	18349075	MACS_peak_755	393.06	AT1G49570	protein_coding_gene	Peroxidase superfamily protein	---	Peroxidase superfamily protein; FUNCTIONS IN: peroxidase activity, heme binding; INVOLVED IN: oxidation reduction, response to oxidative stress; LOCATED IN: endomembrane system; EXPRESSED IN: leaf lamina base, leaf whorl, hypocotyl, sepal, root; EXPRESSED DURING: 4 anthesis; CONTAINS InterPro DOMAIN/s: Haem peroxidase (InterPro:IPR010255), Plant peroxidase (InterPro:IPR000823), Peroxidases heam-l…	0	1	TAIR10	18347036	18348951	+	0	0	0
1	18425669	18426694	MACS_peak_756	223.88	AT1G49770	protein_coding_gene	basic helix-loop-helix (bHLH) DNA-binding superfamily protein	Encodes a member of the basic helix loop helix family of transcription factors. Loss of RGE1 function causes shriveled seeds that contain small embryos. The cuticle in the embryos does not develop normally, possible due to the adeherence of the endosperm to the developing embryo. RGE1 is expressed in the endosperm surrounding region which directly surrounds the developing embryo, however it exert…	RETARDED GROWTH OF EMBRYO 1 (RGE1); FUNCTIONS IN: DNA binding, sequence-specific DNA binding transcription factor activity; INVOLVED IN: embryo development, regulation of transcription; LOCATED IN: nucleus; EXPRESSED IN: endosperm; CONTAINS InterPro DOMAIN/s: Helix-loop-helix DNA-binding domain (InterPro:IPR001092), Helix-loop-helix DNA-binding (InterPro:IPR011598); BEST Arabidopsis thaliana prot…	0	1	TAIR10	18424578	18426782	+	0	0	0
1	18438235	18439339	MACS_peak_757	135.69	AT1G49800	protein_coding_gene	---	---	unknown protein; FUNCTIONS IN: molecular_function unknown; INVOLVED IN: biological_process unknown; LOCATED IN: endomembrane system; EXPRESSED IN: sepal, male gametophyte, stamen; EXPRESSED DURING: 4 anthesis; Has 12 Blast hits to 12 proteins in 5 species: Archae - 0; Bacteria - 0; Metazoa - 0; Fungi - 0; Plants - 12; Viruses - 0; Other Eukaryotes - 0 (source: NCBI BLink).	0	1	TAIR10	18438365	18438939	-	0	0	0
1	18458677	18460096	MACS_peak_758	286.38	AT1G49860	protein_coding_gene	glutathione S-transferase (class phi) 14	Encodes glutathione transferase belonging to the phi class of GSTs. Naming convention according to Wagner et al. (2002).	glutathione S-transferase (class phi) 14 (GSTF14); CONTAINS InterPro DOMAIN/s: Thioredoxin fold (InterPro:IPR012335), Glutathione S-transferase, C-terminal (InterPro:IPR004046), Glutathione S-transferase, C-terminal-like (InterPro:IPR010987), Glutathione S-transferase/chloride channel, C-terminal (InterPro:IPR017933), Glutathione S-transferase, N-terminal (InterPro:IPR004045), Thioredoxin-like fo…	0	1	TAIR10	18458666	18459906	+	0	0	0
1	18484569	18485933	MACS_peak_759	227.17	AT1G49930	protein_coding_gene	---	---	BEST Arabidopsis thaliana protein match is: Alanyl-tRNA synthetase, class IIc (TAIR:AT5G22800.1); Has 21 Blast hits to 21 proteins in 10 species: Archae - 0; Bacteria - 0; Metazoa - 0; Fungi - 0; Plants - 21; Viruses - 0; Other Eukaryotes - 0 (source: NCBI BLink).	0	1	TAIR10	18484932	18485639	+	2	0	0
1	18498229	18499295	MACS_peak_760	92.12	AT1G49960	protein_coding_gene	Xanthine/uracil permease family protein	---	Xanthine/uracil permease family protein; FUNCTIONS IN: transmembrane transporter activity; INVOLVED IN: transport, transmembrane transport; LOCATED IN: membrane; EXPRESSED IN: 9 plant structures; EXPRESSED DURING: 4 anthesis, petal differentiation and expansion stage, D bilateral stage; CONTAINS InterPro DOMAIN/s: Xanthine/uracil/vitamin C permease (InterPro:IPR006043); BEST Arabidopsis thaliana …	0	1	TAIR10	18498639	18501886	+	0	0	0
1	18545832	18547441	MACS_peak_761	617.18	AT1G50050	protein_coding_gene	CAP (Cysteine-rich secretory proteins, Antigen 5, and Pathogenesis-related 1 protein) superfamily protein	---	CAP (Cysteine-rich secretory proteins, Antigen 5, and Pathogenesis-related 1 protein) superfamily protein; FUNCTIONS IN: molecular_function unknown; INVOLVED IN: biological_process unknown; LOCATED IN: endomembrane system, extracellular region; EXPRESSED IN: root; CONTAINS InterPro DOMAIN/s: Ves allergen (InterPro:IPR002413), Allergen V5/Tpx-1 related (InterPro:IPR001283), SCP-like extracellular …	0	1	TAIR10	18546165	18549046	+	1	0	0
1	18555414	18557839	MACS_peak_762	445.29	AT1G50090	protein_coding_gene	D-aminoacid aminotransferase-like PLP-dependent enzymes superfamily protein	---	D-aminoacid aminotransferase-like PLP-dependent enzymes superfamily protein; FUNCTIONS IN: branched-chain-amino-acid transaminase activity, catalytic activity; INVOLVED IN: branched chain family amino acid metabolic process, metabolic process; LOCATED IN: cellular_component unknown; EXPRESSED IN: root; CONTAINS InterPro DOMAIN/s: Aminotransferase, class IV (InterPro:IPR001544), Aminotransferase, …	0	1	TAIR10	18554641	18556794	-	1	0	0
1	18566311	18567922	MACS_peak_763	503.01	---	---	---	---	---	---	---	---	---	---	---	0	1	0
1	18635585	18636585	MACS_peak_764	82.95	AT1G50310	protein_coding_gene	sugar transporter 9	---	sugar transporter 9 (STP9); FUNCTIONS IN: carbohydrate transmembrane transporter activity, sugar:hydrogen symporter activity; INVOLVED IN: transport, transmembrane transport; LOCATED IN: integral to membrane, membrane; EXPRESSED IN: 16 plant structures; EXPRESSED DURING: 8 growth stages; CONTAINS InterPro DOMAIN/s: Sugar transporter, conserved site (InterPro:IPR005829), Major facilitator superfam…	0	1	TAIR10	18635984	18638110	+	0	0	0
1	18699939	18701021	MACS_peak_765	71.41	AT1G50470	protein_coding_gene	F-box associated ubiquitination effector family protein	---	F-box associated ubiquitination effector family protein; CONTAINS InterPro DOMAIN/s: F-box associated domain, type 1 (InterPro:IPR006527); BEST Arabidopsis thaliana protein match is: F-box and associated interaction domains-containing protein (TAIR:AT3G17560.1); Has 247 Blast hits to 247 proteins in 2 species: Archae - 0; Bacteria - 0; Metazoa - 0; Fungi - 0; Plants - 247; Viruses - 0; Other Euka…	0	1	TAIR10	18700000	18700444	-	0	0	0
1	18762925	18764513	MACS_peak_766	704.84	AT1G50650	protein_coding_gene	Stigma-specific Stig1 family protein	---	Stigma-specific Stig1 family protein; FUNCTIONS IN: molecular_function unknown; INVOLVED IN: biological_process unknown; LOCATED IN: endomembrane system; CONTAINS InterPro DOMAIN/s: Stigma-specific protein Stig1 (InterPro:IPR006969); BEST Arabidopsis thaliana protein match is: Stigma-specific Stig1 family protein (TAIR:AT1G50720.1); Has 352 Blast hits to 217 proteins in 35 species: Archae - 0; Ba…	0	1	TAIR10	18763773	18764297	-	1	0	0
1	18779225	18781206	MACS_peak_767	453.52	AT1G50691	protein_coding_gene	---	---	unknown protein; Has 30201 Blast hits to 17322 proteins in 780 species: Archae - 12; Bacteria - 1396; Metazoa - 17338; Fungi - 3422; Plants - 5037; Viruses - 0; Other Eukaryotes - 2996 (source: NCBI BLink).	0	1	TAIR10	18780822	18781070	-	0	3	0
1	18788806	18789958	MACS_peak_768	206.99	AT1G50720	protein_coding_gene	Stigma-specific Stig1 family protein	---	Stigma-specific Stig1 family protein; FUNCTIONS IN: molecular_function unknown; INVOLVED IN: biological_process unknown; LOCATED IN: endomembrane system; CONTAINS InterPro DOMAIN/s: Stigma-specific protein Stig1 (InterPro:IPR006969); BEST Arabidopsis thaliana protein match is: Stigma-specific Stig1 family protein (TAIR:AT5G55110.1); Has 305 Blast hits to 197 proteins in 35 species: Archae - 0; Ba…	0	1	TAIR10	18789180	18789644	-	0	0	0
[truncated: 4,290 more rows]

## Sheet: S2C_Col_target_enriched_func.
Table S2C. Biological functions enriched in Col H3K27me3 peak targets, including GO terms of biological process (BP), molecular function (MF), cellular compartment (CC), and Interpro domains.
Type	Category	Term	Description	Count	%	PValue	Genes	ListTotal	PopHits	PopTotal	FoldChange	Bonferroni	Benjamini	FDR
[truncated: 64 more rows]

## Sheet: S2D_Col_peak_enriched_motifs
Table S2D. Motifs enriched in 5,055 Col-0 H3K27me3 peaks with P<1e-5, as well as the enrichment statistics of CArG box motifs.
[truncated: 29 more rows]
