# Supplementary material for: Arabidopsis Flower and Embryo Developmental Genes are Repressed in Seedlings by Different Combinations of Polycomb Group Proteins in Association with Distinct Sets of Cis-regulatory Elements
Source: PLoS Genet. 2016 Jan 13;12(1):e1005771. doi: 10.1371/journal.pgen.1005771 (PMC4711971; doi:10.1371/journal.pgen.1005771)
Supplement: S3 Table — (A) Genomic coordinates, motifs and target genes information for 3,289 H3K27me3 regions regulated by at least one PcG component with cutoff: |M|>1 & P<1e-3. (B) 51% regions with reduced H3K27me3 in clf-29 show less reduction in summit regions. (C) 53% regions with reduced H3K27me3 in tfl2-2 show less reduction in summit regions. (XLSX) [file pgen.1005771.s020.xlsx]

## Sheet: S3A_chipseq_Mvalue_motif
Table S3A. MAnorm result,target gene expression,and motif information for 3289 H3K27me3 regions regulated by at least one PcG component with cutoff: |M|>1 & P<1e-3. "NaN" represents not identified as a peak in replicate, most of which are regions with relatively small numbers of reads. Calculation of robust index is described in Methods. The smaller the robust index, the lower the variability bet…
genomic region overlapping with H3K27me3 peaks							MAnorm result																			number of overlap with LHP1/EMF1/FIE Binding			overlap with MADS-box TF binding						target gene information											Target gene expression information
						Mvalue = log2(mutant/Col)								Avalue = 0.5*log2(mutant*Col)				Pvalue				Robust index							1: overlap 0: no overlap																	atbmi1a,b		clf-29
peak_ID	Chr_id	genome_build	start	end	chip_cluster	atring1a,b	atbmi1a,b	clf-29	tfl2-2	lhp1-6	atring1a,b-rep2	atbmi1a,b-rep2	clf-29-rep2	atring1a,b	atbmi1a,b	clf-29	tfl2-2	atring1a,b	atbmi1a,b	clf-29	tfl2-2	atring1a,b	atbmi1a,b	clf-29	tfl2-2	LHP1_binding(GSE8169)	EMF1_binding(GSE34689)	FIE_binding(GSE48857)	AP1_4d(GSE46987)	SEP3_4d(GSE46987)	AP3(GSE38358)	AG(GSE45939)	PI(GSE38358)	svp_seedlings_cat(GSE33120)	target_gene(1kb upstream of gene body)	distance	Chr	gene start	gene end	strand	expression_class	gene_model_type	short_description	Curator_summary	Computational_description	log2(mut/Col)	Pvalue	log2(mut/Col)	Pvalue
2752	Chr5	TAIR10	7367001	7368000	0	-0.839561	-0.572604	-1.58982	-1.13	-1.4267	-0.843038	-0.522095	-2.57467	6.17634	5.87219	5.78225	5.96739	0.108188	0.0847404	9.62457e-08	3.38806e-05	0.00206886	0.0462245	0.236601	0.116138	0	2	0	0	0	0	0	0	0	AT5G22260	0	Chr5	7367635	7370295	-	NaN	protein_coding	RING/FYVE/PHD zinc finger superfamily protein	Sporophytic factor controlling anther and pollen development. Mutants fail to make functional pollen;pollen degeneration occurs after microspore release and the tapetum also appears abnormally vacuolated. Similar to PHD-finger motif transcription factors.	male sterility 1 (MS1); CONTAINS InterPro DOMAIN/s: Zinc finger, PHD-type, conserved site (InterPro:IPR019786), Zinc finger, PHD-type (InterPro:IPR001965), Zinc finger, FYVE/PHD-type (InterPro:IPR011011), Zinc finger, PHD-finger (InterPro:IPR019787); BEST Arabidopsis thaliana protein match is: RING/FYVE/PHD zinc finger superfamily protein (TAIR:AT1G66170.1); Has 884 Blast hits to 874 proteins in …	0	1	0	1
2537	Chr5	TAIR10	1023001	1024000	0	-0.186804	0.019891	-1.42342	-1.54143	-0.449462	-0.184855	-1.05249	-4.3161	5.44988	5.45596	4.98609	4.85078	0.477616	0.498958	0.00039803	0.000131427	0.00527225	1.04054	0.50417	0.549033	0	1	0	1	1	0	1	1	0	AT5G03837	0	Chr5	1023528	1023683	-	NaN	protein_coding	---	This gene encodes a small protein and has either evidence of transcription or purifying selection.	unknown protein; Has 30201 Blast hits to 17322 proteins in 780 species: Archae - 12; Bacteria - 1396; Metazoa - 17338; Fungi - 3422; Plants - 5037; Viruses - 0; Other Eukaryotes - 2996 (source: NCBI BLink).	0	1	0	1
1900	Chr3	TAIR10	17969001	17970000	0	0.222763	0.60479	-0.334382	-2.13414	-0.0266543	0.220156	-0.861124	-3.33905	4.88287	5.19637	4.79557	3.81201	0.419367	0.0998517	0.354166	0.000223593	0.00585945	5.76375	0.818392	0.976233	0	0	0	0	0	0	0	0	0	AT3G48510	-464	Chr3	17967354	17968538	-	NaN	protein_coding	---	---	unknown protein; BEST Arabidopsis thaliana protein match is: unknown protein (TAIR:AT5G63350.1); Has 98 Blast hits to 98 proteins in 11 species: Archae - 0; Bacteria - 0; Metazoa - 0; Fungi - 0; Plants - 98; Viruses - 0; Other Eukaryotes - 0 (source: NCBI BLink).	0.530515	0.601536	0.530515	0.412332
789	Chr1	TAIR10	25848001	25849000	0	0.602316	0.173014	-1.95082	-0.210384	0.0299251	0.610113	0.442419	-2.61935	6.3797	5.97559	5.30567	6.11217	0.0132773	0.39876	2.64716e-08	0.346142	0.00642063	0.436331	0.146345	1.34658	1	2	0	0	0	0	0	0	0	AT1G68800	0	Chr1	25847066	25848540	-	0	protein_coding	TCP domain protein 12	Encodes a TCP transcription factor, closely related to teosinte branched1, arrests axillary bud development and prevents axillary bud outgrowth. Transcription level and mutant phenotype are weaker than its homolog BRC1 (At3G18550).	TCP domain protein 12 (TCP12); CONTAINS InterPro DOMAIN/s: Transcription factor, TCP (InterPro:IPR005333), CYC/TB1, R domain (InterPro:IPR017888), Transcription factor TCP subgroup (InterPro:IPR017887); BEST Arabidopsis thaliana protein match is: TCP family transcription factor (TAIR:AT1G67260.1); Has 30201 Blast hits to 17322 proteins in 780 species: Archae - 12; Bacteria - 1396; Metazoa - 17338…	-0.695145	0.36618	2.22542	0.000560356
372	Chr1	TAIR10	11812001	11813000	0	0.438144	0.677897	-1.98829	-1.23246	-1.31689	0.43103	0.872955	-1.88338	5.68534	5.76188	4.68466	4.97423	0.152636	0.0250115	6.07469e-06	0.00161145	0.0081665	0.125613	0.0271127	0.0331472	0	1	0	0	0	0	0	0	1	AT1G32660	0	Chr1	11811040	11812380	+	NaN	protein_coding	F-box and associated interaction domains-containing protein	---	F-box and associated interaction domains-containing protein; CONTAINS InterPro DOMAIN/s: F-box domain, cyclin-like (InterPro:IPR001810), F-box domain, Skp2-like (InterPro:IPR022364), F-box associated domain, type 3 (InterPro:IPR013187), F-box associated interaction domain (InterPro:IPR017451); BEST Arabidopsis thaliana protein match is: F-box and associated interaction domains-containing protein …	-0.137504	1	-0.137504	1
586	Chr1	TAIR10	21933001	21934000	0	0.921516	0.624933	-1.29976	-0.00670768	0.116976	0.906569	0.860643	-2.18119	6.33412	6.04534	5.41661	6.00392	0.000133225	0.0225668	0.000164886	0.499827	0.00816704	0.158452	0.25336	1.10168	1	1	1	0	0	0	0	0	0	AT1G59680	0	Chr1	21933021	21934216	+	NaN	protein_coding	F-box associated ubiquitination effector family protein	---	embryo sac development arrest 1 (EDA1); CONTAINS InterPro DOMAIN/s: F-box domain, cyclin-like (InterPro:IPR001810), F-box domain, Skp2-like (InterPro:IPR022364), F-box associated domain, type 1 (InterPro:IPR006527), F-box associated interaction domain (InterPro:IPR017451); BEST Arabidopsis thaliana protein match is: F-box associated ubiquitination effector family protein (TAIR:AT3G14030.1); Has 1…	0	1	0	1
2129	Chr4	TAIR10	5984001	5985000	0	0.526014	-0.881248	-2.11196	-0.0496533	-0.599862	0.535123	0.746444	-1.14376	4.94116	4.43639	3.84903	4.75868	0.180116	0.105683	0.000388488	0.496008	0.00856825	12.2563	0.297568	0.849723	0	0	0	0	0	0	0	0	0	AT4G09450	0	Chr4	5983277	5984531	+	NaN	protein_coding	Duplicated homeodomain-like superfamily protein	---	Duplicated homeodomain-like superfamily protein; CONTAINS InterPro DOMAIN/s: SANT, DNA-binding (InterPro:IPR001005), Homeodomain-like (InterPro:IPR009057), Myb, DNA-binding (InterPro:IPR014778), Myb-like DNA-binding domain, SHAQKYF class (InterPro:IPR006447), HTH transcriptional regulator, Myb-type, DNA-binding (InterPro:IPR017930); BEST Arabidopsis thaliana protein match is: Homeodomain-like sup…	0	1	0	1
29	Chr1	TAIR10	923001	924000	0	0.328592	-0.216013	-0.0842975	-1.09159	-1.00911	0.335967	0.184667	-0.910803	6.81155	6.22733	6.76313	6.25386	0.116496	0.361946	0.458928	8.99934e-06	0.0110649	13.6537	0.832247	0.0393014	0	1	1	0	0	0	0	0	0	AT1G03710	0	Chr1	923426	924726	+	0	protein_coding	Cystatin/monellin superfamily protein	---	Cystatin/monellin superfamily protein; FUNCTIONS IN: cysteine-type endopeptidase inhibitor activity; INVOLVED IN: biological_process unknown; LOCATED IN: cellular_component unknown; EXPRESSED IN: 10 plant structures; EXPRESSED DURING: 8 growth stages; CONTAINS InterPro DOMAIN/s: Proteinase inhibitor I25, cystatin (InterPro:IPR000010), Proteinase inhibitor I25, cystatin, conserved region (InterPro…	-0.447459	0.543333	2.68557	7.18561e-06
484	Chr1	TAIR10	18567001	18568000	0	-0.992187	1.18055	-0.405596	-0.171157	-0.440546	-0.970101	0.98663	-0.291345	5.07036	5.90063	5.29995	5.35348	0.185188	2.26004e-05	0.243446	0.433005	0.0112667	0.0893973	0.164404	0.441837	0	0	0	0	0	0	0	0	0	NaN	NaN	NaN	NaN	NaN	NaN	NaN	NaN	NaN	NaN	NaN	NaN	NaN	NaN	NaN
144	Chr1	TAIR10	4690001	4691000	0	0.26162	0.216281	-1.345	-1.13898	-0.965329	0.267714	-0.91838	-4.00582	5.64735	5.56935	5.04345	5.07244	0.331144	0.382917	0.000660924	0.00263767	0.0114693	1.62072	0.49746	0.0825998	0	0	0	0	0	0	0	0	0	AT1G13680	0	Chr1	4690409	4692841	+	0	protein_coding	PLC-like phosphodiesterases superfamily protein	---	PLC-like phosphodiesterases superfamily protein; FUNCTIONS IN: phospholipase C activity, phosphoric diester hydrolase activity; INVOLVED IN: intracellular signaling pathway, lipid metabolic process; LOCATED IN: endomembrane system; EXPRESSED IN: embryo, flower, seed; EXPRESSED DURING: F mature embryo stage, petal differentiation and expansion stage, E expanded cotyledon stage, D bilateral stage; …	1.48543	0.0649616	0.0931094	1
3119	Chr5	TAIR10	21900001	21901000	0	-0.397841	-0.182109	-0.0772616	-1.70397	-0.0815986	-0.38648	-0.930194	-2.29322	5.83124	5.69665	6.06082	5.214	0.381461	0.426512	0.478356	1.17041e-06	0.0145222	0.673767	0.935603	0.909621	0	1	0	0	1	1	0	1	0	NaN	NaN	NaN	NaN	NaN	NaN	NaN	NaN	NaN	NaN	NaN	NaN	NaN	NaN	NaN
261	Chr1	TAIR10	8320001	8321000	0	0.559173	0.630742	-1.74684	-0.166453	-0.790562	0.58362	0.717015	-1.82674	5.39434	5.47068	4.45456	5.14732	0.103028	0.0600712	0.000293332	0.444373	0.0213554	0.0639179	0.0223715	0.653507	0	1	0	0	0	0	0	0	0	NaN	NaN	NaN	NaN	NaN	NaN	NaN	NaN	NaN	NaN	NaN	NaN	NaN	NaN	NaN
1455	Chr3	TAIR10	419001	420000	0	0.0996907	0.749948	-1.66199	-0.989065	-0.611022	0.104902	0.398077	-2.42087	5.50591	5.79014	4.83149	5.08548	0.473601	0.0118961	7.96649e-05	0.00924732	0.0252246	0.305968	0.185962	0.23656	0	0	0	0	0	0	0	0	0	AT3G02240	0	Chr3	418459	419164	+	NaN	protein_coding	---	Encodes a root meristem growth factor (RGF). Belongs to a family of functionally redundant homologous peptides that are secreted, tyrosine-sulfated, and expressed mainly in the stem cell area and the innermost layer of central columella cells. RGFs are required for maintenance of the root stem cell niche and transit amplifying cell proliferation. Members of this family include: At5g60810 (RGF1), …	root meristem growth factor 7 (RGF7); FUNCTIONS IN: molecular_function unknown; INVOLVED IN: biological_process unknown; LOCATED IN: endomembrane system; EXPRESSED IN: root, stamen; EXPRESSED DURING: 4 anthesis; BEST Arabidopsis thaliana protein match is: unknown protein (TAIR:AT3G02242.1); Has 6 Blast hits to 6 proteins in 2 species: Archae - 0; Bacteria - 0; Metazoa - 0; Fungi - 0; Plants - 6; …	0	1	0.137504	1
1290	Chr2	TAIR10	15330001	15331000	0	0.433725	0.200517	-1.53268	-0.724617	-1.18728	0.412085	0.671715	-1.4359	5.74331	5.56901	4.96297	5.28977	0.149038	0.39756	0.000145286	0.0424097	0.0255246	0.538985	0.0326213	0.242247	0	0	0	0	0	0	0	0	1	AT2G36560	0	Chr2	15329143	15332447	-	NaN	protein_coding	AT hook motif DNA-binding family protein	A paternally expressed imprinted gene.	AT hook motif DNA-binding family protein; CONTAINS InterPro DOMAIN/s: Protein of unknown function DUF296 (InterPro:IPR005175); BEST Arabidopsis thaliana protein match is: AT-hook motif nuclear-localized protein 1 (TAIR:AT4G12080.1); Has 3707 Blast hits to 1497 proteins in 203 species: Archae - 2; Bacteria - 99; Metazoa - 609; Fungi - 221; Plants - 729; Viruses - 1; Other Eukaryotes - 2046 (source…	0	1	0.137504	1
3116	Chr5	TAIR10	21808001	21809000	0	0.428672	0.161391	-2.37529	-0.19695	0.210494	0.451657	0.467685	-1.5352	5.64292	5.47494	4.46149	5.4534	0.165955	0.43505	4.72984e-07	0.407672	0.0260503	0.485351	0.214942	26.2123	0	0	0	0	0	0	0	0	0	AT5G53730	0	Chr5	21807974	21808810	-	NaN	protein_coding	Late embryogenesis abundant (LEA) hydroxyproline-rich glycoprotein family	---	Late embryogenesis abundant (LEA) hydroxyproline-rich glycoprotein family; CONTAINS InterPro DOMAIN/s: Late embryogenesis abundant protein, group 2 (InterPro:IPR004864); BEST Arabidopsis thaliana protein match is: Late embryogenesis abundant (LEA) hydroxyproline-rich glycoprotein family (TAIR:AT3G44220.1); Has 1807 Blast hits to 1807 proteins in 277 species: Archae - 0; Bacteria - 0; Metazoa - 73…	0.132755	0.922628	0.701776	0.214232
2296	Chr4	TAIR10	11140001	11141000	0	0.442201	0.00867073	-1.51793	0.174095	-0.170474	0.467246	0.67439	-0.809283	5.98048	5.65043	5.19947	5.97762	0.11348	0.499773	4.09434e-05	0.397502	0.0274791	0.971767	0.304766	61.297	0	0	0	0	0	0	0	0	1	AT4G20800	0	Chr4	11139609	11141311	+	NaN	protein_coding	FAD-binding Berberine family protein	---	FAD-binding Berberine family protein; FUNCTIONS IN: oxidoreductase activity, FAD binding, catalytic activity; LOCATED IN: endomembrane system; EXPRESSED IN: embryo, synergid; EXPRESSED DURING: C globular stage; CONTAINS InterPro DOMAIN/s: FAD-binding, type 2 (InterPro:IPR016166), Berberine/berberine-like (InterPro:IPR012951), FAD linked oxidase, N-terminal (InterPro:IPR006094); BEST Arabidopsis t…	0	1	0.137504	1
2200	Chr4	TAIR10	7899001	7900000	0	0.362866	0.289237	-1.87772	-0.388883	-0.0195699	0.383961	-0.629141	-4.75746	5.91425	5.77049	5.00033	5.66893	0.19264	0.288904	1.75979e-06	0.198432	0.0281714	2.71786	0.434143	0.908625	0	0	0	0	0	0	0	0	0	AT4G13580	-374	Chr4	7900374	7901328	+	1	protein_coding	Disease resistance-responsive (dirigent-like protein) family protein	---	Disease resistance-responsive (dirigent-like protein) family protein; FUNCTIONS IN: molecular_function unknown; LOCATED IN: endomembrane system; EXPRESSED IN: root; CONTAINS InterPro DOMAIN/s: Plant disease resistance response protein (InterPro:IPR004265); BEST Arabidopsis thaliana protein match is: Disease resistance-responsive (dirigent-like protein) family protein (TAIR:AT3G24020.1); Has 723 B…	0.469485	0.47313	0.823122	0.132498
1942	Chr3	TAIR10	19530001	19531000	0	0.436078	-0.0098875	-0.795366	-1.04181	-0.796338	0.410136	-0.406327	-3.6646	6.57401	6.09597	6.1344	5.98051	0.0567365	0.499691	0.0035936	0.00013281	0.0305833	0.957087	0.64362	0.133689	0	1	0	0	0	0	0	0	0	AT3G52680	0	Chr3	19527029	19531167	+	NaN	protein_coding	F-box/RNI-like/FBD-like domains-containing protein	---	F-box/RNI-like/FBD-like domains-containing protein; CONTAINS InterPro DOMAIN/s: FBD (InterPro:IPR013596), F-box domain, cyclin-like (InterPro:IPR001810), F-box domain, Skp2-like (InterPro:IPR022364), FBD-like (InterPro:IPR006566), Leucine-rich repeat 2 (InterPro:IPR013101); BEST Arabidopsis thaliana protein match is: F-box/RNI-like/FBD-like domains-containing protein (TAIR:AT4G00160.1); Has 2324 …	-0.245577	0.705097	-0.149682	0.685008
2188	Chr4	TAIR10	7750001	7751000	0	0.613404	0.275537	-1.75381	0.213535	-0.172739	0.654209	0.857948	-1.29093	5.66848	5.48115	4.69448	5.59024	0.0501955	0.332714	7.11259e-05	0.384044	0.0321397	0.512919	0.152126	9.02585	0	0	0	0	0	0	0	0	1	AT4G13310	0	Chr4	7750305	7753133	+	NaN	protein_coding	cytochrome P450, family 71, subfamily A, polypeptide 20	putative cytochrome P450	cytochrome P450, family 71, subfamily A, polypeptide 20 (CYP71A20); FUNCTIONS IN: electron carrier activity, monooxygenase activity, iron ion binding, oxygen binding, heme binding; INVOLVED IN: oxidation reduction; CONTAINS InterPro DOMAIN/s: Cytochrome P450 (InterPro:IPR001128), Cytochrome P450, E-class, group I (InterPro:IPR002401), Cytochrome P450, conserved site (InterPro:IPR017972); BEST Ara…	0	1	0	1
1521	Chr3	TAIR10	3075001	3076000	0	0.410441	0.465053	-2.36002	-0.805357	-0.437869	0.440062	-0.0655249	-3.71065	6.55902	6.33117	5.38002	6.09651	0.0741955	0.0617462	2.88099e-12	0.0024188	0.0347456	1.3214	0.222558	0.296069	0	0	0	0	0	0	0	0	0	AT3G09990	0	Chr3	3072662	3075142	-	NaN	protein_coding	Nucleoside transporter family protein	---	Nucleoside transporter family protein; FUNCTIONS IN: nucleoside transmembrane transporter activity; INVOLVED IN: transport; LOCATED IN: membrane; CONTAINS InterPro DOMAIN/s: Delayed-early response protein/equilibrative nucleoside transporter (InterPro:IPR002259); BEST Arabidopsis thaliana protein match is: Major facilitator superfamily protein (TAIR:AT4G05120.1); Has 921 Blast hits to 872 protein…	0	1	0	1
3230	Chr5	TAIR10	24966001	24967000	0	0.435689	0.314376	-1.24234	-0.364082	0.084846	0.405795	0.319051	-2.97314	5.84074	5.69937	5.19754	5.56878	0.135353	0.269824	0.000925505	0.234836	0.035441	0.00735659	0.410778	1.6193	0	1	0	0	1	0	0	1	0	AT5G62165	0	Chr5	24964700	24968520	+	0	protein_coding	AGAMOUS-like 42	Encodes a MADS box transcription factor. Expressed in quiescent center. Involved in floral transition.	AGAMOUS-like 42 (AGL42); FUNCTIONS IN: sequence-specific DNA binding transcription factor activity; INVOLVED IN: regulation of transcription, DNA-dependent; LOCATED IN: nucleus; EXPRESSED IN: 17 plant structures; EXPRESSED DURING: 8 growth stages; CONTAINS InterPro DOMAIN/s: Transcription factor, MADS-box (InterPro:IPR002100), Transcription factor, K-box (InterPro:IPR002487); BEST Arabidopsis tha…	-1.10692	0.0275332	1.28011	0.11641
2842	Chr5	TAIR10	10032001	10033000	0	1.64482	1.54868	-2.05461	-0.0456893	0.301206	1.76792	1.98882	-1.18254	4.01093	4.46313	2.40956	3.23545	0.00263411	0.000863869	0.0411357	0.498821	0.0360507	0.124352	0.269562	1.34708	0	0	0	0	0	0	0	0	0	AT5G28030	0	Chr5	10030406	10032451	-	0	protein_coding	L-cysteine desulfhydrase 1	---	L-cysteine desulfhydrase 1 (DES1); FUNCTIONS IN: pyridoxal phosphate binding, cysteine synthase activity, catalytic activity; INVOLVED IN: cysteine biosynthetic process from serine, cysteine biosynthetic process, metabolic process; EXPRESSED IN: 11 plant structures; EXPRESSED DURING: LP.04 four leaves visible, 4 anthesis, LP.02 two leaves visible, petal differentiation and expansion stage, E expa…	-0.0642288	0.898229	0.795547	0.00331001
2792	Chr5	TAIR10	8200001	8201000	0	0.377291	0.173043	-2.41412	-0.391008	-0.579051	0.406276	0.257251	-3.43772	6.42346	6.09458	5.23684	6.18186	0.115242	0.391046	1.10909e-11	0.131818	0.0368968	0.194792	0.174979	0.194247	0	1	0	0	0	0	0	0	0	AT5G24190	0	Chr5	8199757	8201051	+	0	protein_coding	Lipase class 3-related protein	---	Lipase class 3-related protein; FUNCTIONS IN: triglyceride lipase activity; INVOLVED IN: lipid metabolic process; LOCATED IN: cellular_component unknown; CONTAINS InterPro DOMAIN/s: Lipase, class 3 (InterPro:IPR002921); BEST Arabidopsis thaliana protein match is: Lipase class 3-related protein (TAIR:AT5G24180.1); Has 1807 Blast hits to 1807 proteins in 277 species: Archae - 0; Bacteria - 0; Metaz…	-0.263034	0.831812	1.54432	0.00108854
2825	Chr5	TAIR10	9103001	9104000	0	1.00129	0.296319	-1.32259	0.343398	0.411023	0.928902	0.916716	-0.955547	5.81539	5.45574	4.85549	5.60702	0.000566577	0.31474	0.00180047	0.250701	0.0374653	0.5106	0.161258	0.0894024	0	0	0	0	0	0	0	0	0	AT5G26050	0	Chr5	9103179	9104100	-	NaN	protein_coding	Plant self-incompatibility protein S1 family	---	Plant self-incompatibility protein S1 family; FUNCTIONS IN: molecular_function unknown; INVOLVED IN: biological_process unknown; LOCATED IN: endomembrane system; CONTAINS InterPro DOMAIN/s: Plant self-incompatibility S1 (InterPro:IPR010264); BEST Arabidopsis thaliana protein match is: Plant self-incompatibility protein S1 family (TAIR:AT5G11820.1); Has 1807 Blast hits to 1807 proteins in 277 spec…	0	1	0	1
685	Chr1	TAIR10	23950001	23951000	0	0.267011	0.415434	-1.12627	-1.63351	-0.18321	0.247523	-0.299328	-2.06285	5.48812	5.54564	4.98913	4.65938	0.340444	0.189867	0.00569456	0.000150233	0.0377281	6.05188	0.293865	0.799187	0	1	0	0	0	0	0	0	0	AT1G64480	-251	Chr1	23948028	23949751	-	NaN	protein_coding	calcineurin B-like protein 8	calcineurin B-like protein 8, member of plant-specific family of calcium sensor proteins containing 3 EF-hand motifs	calcineurin B-like protein 8 (CBL8); CONTAINS InterPro DOMAIN/s: EF-Hand 1, calcium-binding site (InterPro:IPR018247), Calcineurin B protein (InterPro:IPR015757), Recoverin (InterPro:IPR001125), Calcium-binding EF-hand (InterPro:IPR002048), EF-hand-like domain (InterPro:IPR011992), EF-hand (InterPro:IPR018248), EF-HAND 2 (InterPro:IPR018249); BEST Arabidopsis thaliana protein match is: Calcium-bi…	-0.137504	1	-0.137504	1
2225	Chr4	TAIR10	8745001	8746000	0	0.522117	0.612071	-1.68113	0.676951	0.579803	0.483622	0.484211	-2.37221	5.78751	5.77479	4.8916	5.99055	0.0819405	0.0425592	4.44323e-05	0.0150998	0.038199	0.116418	0.170579	0.0771783	0	0	0	0	0	0	0	0	0	AT4G15320	0	Chr4	8742639	8747981	-	NaN	protein_coding	cellulose synthase-like B6	encodes a gene similar to cellulose synthase	cellulose synthase-like B6 (CSLB06); FUNCTIONS IN: cellulose synthase activity, transferase activity, transferring glycosyl groups, transferase activity; INVOLVED IN: cellulose biosynthetic process, polysaccharide biosynthetic process; LOCATED IN: membrane; CONTAINS InterPro DOMAIN/s: Cellulose synthase (InterPro:IPR005150); BEST Arabidopsis thaliana protein match is: Cellulose synthase family pr…	0.0868775	0.925338	-0.347019	0.495591
1891	Chr3	TAIR10	17540001	17541000	0	0.835128	0.676683	-1.04516	-1.81311	-0.850067	0.771394	0.127702	-2.9019	5.59992	5.54512	4.85848	4.39321	0.00859582	0.038337	0.0148014	0.000122554	0.0396228	0.680793	0.470647	0.361887	0	1	0	0	1	0	0	0	0	AT3G47600	0	Chr3	17539338	17541230	-	NaN	protein_coding	myb domain protein 94	Encodes a putative transcription factor (MYB94).	myb domain protein 94 (MYB94); CONTAINS InterPro DOMAIN/s: SANT, DNA-binding (InterPro:IPR001005), Homeodomain-like (InterPro:IPR009057), Myb, DNA-binding (InterPro:IPR014778), HTH transcriptional regulator, Myb-type, DNA-binding (InterPro:IPR017930), Homeodomain-related (InterPro:IPR012287), Myb transcription factor (InterPro:IPR015495); BEST Arabidopsis thaliana protein match is: myb domain pro…	-0.0215734	0.970939	-0.0215734	0.950954
516	Chr1	TAIR10	19383001	19384000	0	0.613496	0.677207	-1.54278	0.54057	0.241283	0.664982	0.800626	-1.43993	5.87556	5.83961	4.99984	5.96573	0.0351747	0.021327	0.00010534	0.0557543	0.040208	0.0834008	0.0345065	0.381815	0	1	0	0	0	0	0	0	0	AT1G52100	0	Chr1	19383122	19385602	-	1	protein_coding	Mannose-binding lectin superfamily protein	---	Mannose-binding lectin superfamily protein; FUNCTIONS IN: molecular_function unknown; INVOLVED IN: biological_process unknown; LOCATED IN: membrane; EXPRESSED IN: shoot, cotyledon, hypocotyl, leaf; CONTAINS InterPro DOMAIN/s: Mannose-binding lectin (InterPro:IPR001229); BEST Arabidopsis thaliana protein match is: Mannose-binding lectin superfamily protein (TAIR:AT5G35940.1); Has 1742 Blast hits t…	1.79102	8.55573e-05	0.376323	0.243804
2109	Chr4	TAIR10	4791001	4792000	0	0.328967	0.428256	-2.94857	-1.47725	-1.71861	0.3567	-0.540335	-3.63792	5.41602	5.47358	4.01151	4.63197	0.287041	0.187874	7.28229e-08	0.000747887	0.040329	8.799	0.104692	0.07557	0	2	0	0	0	0	0	0	0	AT4G07940	-673	Chr4	4792673	4794109	+	NaN	protein_coding	Protein of unknown function (DUF3245)	---	Protein of unknown function (DUF3245); CONTAINS InterPro DOMAIN/s: Protein of unknown function DUF3245 (InterPro:IPR021641); BEST Arabidopsis thaliana protein match is: Protein of unknown function (DUF3245) (TAIR:AT3G61370.1); Has 36 Blast hits to 36 proteins in 10 species: Archae - 0; Bacteria - 0; Metazoa - 0; Fungi - 0; Plants - 36; Viruses - 0; Other Eukaryotes - 0 (source: NCBI BLink).	-0.125531	1	0.415037	0.571588
984	Chr2	TAIR10	1867001	1868000	0	1.24499	1.75924	-0.412994	-0.969941	0.216064	1.14769	0.491889	-3.06143	3.22568	4.12277	2.62233	2.17401	0.0875498	0.000760981	0.444957	0.300238	0.040631	0.562485	0.762705	1.57739	0	0	0	0	0	0	0	0	0	NaN	NaN	NaN	NaN	NaN	NaN	NaN	NaN	NaN	NaN	NaN	NaN	NaN	NaN	NaN
1065	Chr2	TAIR10	8100001	8101000	0	0.537525	0.500809	-1.3664	-0.127808	-0.0396884	0.494517	0.613177	-2.35808	5.97164	5.85348	5.21668	5.76882	0.0566392	0.0875967	0.000223175	0.449273	0.0415924	0.10069	0.266405	0.532457	0	0	0	0	0	0	0	0	0	NaN	NaN	NaN	NaN	NaN	NaN	NaN	NaN	NaN	NaN	NaN	NaN	NaN	NaN	NaN
1757	Chr3	TAIR10	10010001	10011000	0	1.79939	1.0317	-1.24093	-0.502485	-0.89939	1.65032	1.78378	-1.77149	5.81919	5.5225	4.50548	4.77938	1.39352e-10	0.00140015	0.0102662	0.217399	0.0431881	0.266935	0.176242	0.283528	0	1	0	0	0	0	0	0	1	AT3G27150	0	Chr3	10009442	10011641	-	NaN	protein_coding	Galactose oxidase/kelch repeat superfamily protein	Target gene of MIR2111-5p.	Galactose oxidase/kelch repeat superfamily protein; CONTAINS InterPro DOMAIN/s: Galactose oxidase/kelch, beta-propeller (InterPro:IPR011043), Kelch repeat type 1 (InterPro:IPR006652), Kelch related (InterPro:IPR013089), Kelch-type beta propeller (InterPro:IPR015915); BEST Arabidopsis thaliana protein match is: Galactose oxidase/kelch repeat superfamily protein (TAIR:AT5G40680.1); Has 8386 Blast h…	-0.115477	1	0.758992	0.175465
2224	Chr4	TAIR10	8744001	8745000	0	0.296164	0.192093	-1.94567	-0.0205312	-0.118954	0.324117	0.502481	-3.19971	5.34214	5.31173	4.43707	5.30147	0.326112	0.419293	5.43376e-05	0.499003	0.0449199	0.445592	0.243818	0.715879	0	0	0	0	0	0	0	0	0	AT4G15320	0	Chr4	8742639	8747981	-	NaN	protein_coding	cellulose synthase-like B6	encodes a gene similar to cellulose synthase	cellulose synthase-like B6 (CSLB06); FUNCTIONS IN: cellulose synthase activity, transferase activity, transferring glycosyl groups, transferase activity; INVOLVED IN: cellulose biosynthetic process, polysaccharide biosynthetic process; LOCATED IN: membrane; CONTAINS InterPro DOMAIN/s: Cellulose synthase (InterPro:IPR005150); BEST Arabidopsis thaliana protein match is: Cellulose synthase family pr…	0.0868775	0.925338	-0.347019	0.495591
1880	Chr3	TAIR10	17052001	17053000	0	0.608617	0.337243	-1.20746	-0.0868941	-0.235204	0.556058	0.313609	-2.28859	6.49233	6.14105	5.77087	6.286	0.00910591	0.190664	7.21529e-05	0.465838	0.0450503	0.0362022	0.30942	0.463327	0	1	0	0	0	0	0	0	0	AT3G46370	0	Chr3	17051955	17055514	+	NaN	protein_coding	Leucine-rich repeat protein kinase family protein	---	Leucine-rich repeat protein kinase family protein; FUNCTIONS IN: protein serine/threonine kinase activity, kinase activity, ATP binding; INVOLVED IN: transmembrane receptor protein tyrosine kinase signaling pathway, protein amino acid phosphorylation; LOCATED IN: cellular_component unknown; CONTAINS InterPro DOMAIN/s: Protein kinase, ATP binding site (InterPro:IPR017441), Protein kinase, catalyti…	-0.625725	0.355418	0.212081	0.5462
1122	Chr2	TAIR10	9705001	9706000	0	0.493194	0.517236	-1.87795	-1.09493	-0.763499	0.542701	0.586	-2.41937	6.08362	5.96382	5.10285	5.42261	0.0689345	0.0672835	6.9566e-07	0.00103728	0.0476998	0.0622166	0.126049	0.178529	0	1	0	0	0	0	0	0	0	AT2G22800	0	Chr2	9704706	9706150	-	0	protein_coding	Homeobox-leucine zipper protein family	Encodes homeobox protein HAT9.	HAT9; FUNCTIONS IN: DNA binding, sequence-specific DNA binding transcription factor activity; INVOLVED IN: regulation of transcription, DNA-dependent, regulation of transcription; LOCATED IN: nucleus; EXPRESSED IN: 13 plant structures; EXPRESSED DURING: LP.04 four leaves visible, 4 anthesis, petal differentiation and expansion stage, E expanded cotyledon stage; CONTAINS InterPro DOMAIN/s: Homeobo…	-0.166133	0.812995	1.29639	5.60373e-05
1284	Chr2	TAIR10	15160001	15161000	0	-0.28129	-0.110214	-1.20537	-0.393289	-0.323152	-0.254752	0.500789	-0.807375	6.19434	5.98244	5.84736	6.21128	0.420153	0.465739	4.60445e-05	0.126222	0.0496924	1.5564	0.197932	0.0981701	0	1	0	0	0	0	0	0	0	AT2G36100	0	Chr2	15159591	15160750	-	NaN	protein_coding	Uncharacterised protein family (UPF0497)	---	Uncharacterised protein family (UPF0497); CONTAINS InterPro DOMAIN/s: Uncharacterised protein family UPF0497, trans-membrane plant (InterPro:IPR006702), Uncharacterised protein family UPF0497, trans-membrane plant subgroup (InterPro:IPR006459); BEST Arabidopsis thaliana protein match is: Uncharacterised protein family (UPF0497) (TAIR:AT3G11550.1); Has 599 Blast hits to 599 proteins in 21 species:…	0.584963	0.452641	0.184425	0.770867
529	Chr1	TAIR10	19696001	19697000	0	-0.3568	0.277775	-1.08827	-2.01558	-0.423712	-0.398461	-0.686394	-3.5572	4.94298	5.23134	4.68986	4.13821	0.444531	0.352997	0.0167639	9.0374e-05	0.0553071	2.37118	0.531699	0.653129	0	1	0	0	1	0	0	0	0	NaN	NaN	NaN	NaN	NaN	NaN	NaN	NaN	NaN	NaN	NaN	NaN	NaN	NaN	NaN
622	Chr1	TAIR10	22714001	22715000	0	0.246992	0.512682	-1.72826	-0.98414	0.347893	0.219037	0.202577	-2.41202	5.63673	5.71503	4.85593	5.14647	0.347248	0.0952218	3.32174e-05	0.00811228	0.0597286	0.432348	0.16523	2.10018	0	0	0	0	0	0	0	0	0	AT1G61563	0	Chr1	22714921	22715448	-	NaN	protein_coding	ralf-like 8	Member of a diversely expressed predicted peptide family showing sequence similarity to tobacco Rapid Alkalinization Factor (RALF), and is believed to play an essential role in the physiology of Arabidopsis. Consists of a single exon and is characterized by a conserved C-terminal motif and N-terminal signal peptide.	ralf-like 8 (RALFL8); FUNCTIONS IN: signal transducer activity; INVOLVED IN: N-terminal protein myristoylation, cell-cell signaling; LOCATED IN: apoplast; EXPRESSED IN: flower; EXPRESSED DURING: rosette growth complete; CONTAINS InterPro DOMAIN/s: Rapid ALkalinization Factor (InterPro:IPR008801); BEST Arabidopsis thaliana protein match is: ralf-like 9 (TAIR:AT1G61566.1); Has 33 Blast hits to 33 p…	0	1	0	1
729	Chr1	TAIR10	24701001	24702000	0	0.429316	0.349592	-2.06476	-0.186964	-0.0179388	0.379812	0.298263	-2.8154	6.04886	5.87785	5.01025	5.8737	0.115462	0.210899	1.1313e-07	0.390887	0.0610312	0.0789851	0.153878	0.833036	0	0	0	0	0	0	0	0	0	AT1G66270	0	Chr1	24699990	24703041	-	NaN	protein_coding	Glycosyl hydrolase superfamily protein	BGLU21 encodes a beta-glucosidase that has a high level of activity against the naturally occuring secondary metabolite scopolin. Recombinant BGLU21 produced in insect cells shows lower levels of activity using the structurally similar substrates esculin (33%) and 4-MU-glucoside (9%). BGLU21 is glycosylated in planta and has a C-terminal ER retention signal. Transcript analysis as well as protein…	BGLU21; FUNCTIONS IN: beta-glucosidase activity, hydrolase activity, hydrolyzing O-glycosyl compounds; INVOLVED IN: cellular response to phosphate starvation, response to salt stress, cellular response to cold, cellular response to salt stress, response to osmotic stress; LOCATED IN: vacuole, membrane; EXPRESSED IN: root, callus, leaf; EXPRESSED DURING: seedling growth; CONTAINS InterPro DOMAIN/s…	0	1	0	1
2110	Chr4	TAIR10	4792001	4793000	0	0.203406	-0.0535954	-2.62777	-0.993621	-1.81789	0.230626	0.539476	-2.50059	4.67136	4.7168	3.4942	4.17562	0.44053	0.496522	8.30896e-05	0.0586283	0.0624274	1.21561	0.0248103	0.293384	0	1	0	0	0	0	0	0	0	AT4G07940	0	Chr4	4792673	4794109	+	NaN	protein_coding	Protein of unknown function (DUF3245)	---	Protein of unknown function (DUF3245); CONTAINS InterPro DOMAIN/s: Protein of unknown function DUF3245 (InterPro:IPR021641); BEST Arabidopsis thaliana protein match is: Protein of unknown function (DUF3245) (TAIR:AT3G61370.1); Has 36 Blast hits to 36 proteins in 10 species: Archae - 0; Bacteria - 0; Metazoa - 0; Fungi - 0; Plants - 36; Viruses - 0; Other Eukaryotes - 0 (source: NCBI BLink).	-0.125531	1	0.415037	0.571588
2457	Chr4	TAIR10	16516001	16517000	0	0.607533	-0.000977661	-3.22457	-1.16519	-0.755546	0.688705	0.837053	-3.44187	5.58157	5.27902	3.90469	4.8149	0.059832	0.499998	1.1854e-08	0.00506802	0.0625242	0.999947	0.0326049	0.213497	0	0	0	0	0	0	0	0	0	AT4G34580	0	Chr4	16515327	16519534	+	NaN	protein_coding	Sec14p-like phosphatidylinositol transfer family protein	Encodes COW1 (can of worms1), a phosphatidylinositol transfer protein essential for root hair tip growth. The N-terminus of the COW1 protein is 32% identical to an essential phosphatidylinositol transfer protein (PITP), the yeast Sec14 protein (sec14p) while the C-terminus is 34.5% identical to a late nodulin of Lotus japonicus, Nlj16. Expression of COW1 complements the growth defect associated w…	CAN OF WORMS1 (COW1); FUNCTIONS IN: transporter activity, phosphatidylinositol transporter activity; INVOLVED IN: root epidermal cell differentiation, transport, root hair cell tip growth, cell tip growth; LOCATED IN: intracellular; EXPRESSED IN: 9 plant structures; CONTAINS InterPro DOMAIN/s: Cellular retinaldehyde-binding/triple function, C-terminal (InterPro:IPR001251), Cellular retinaldehyde-…	-2.24393	0.148475	0.811928	0.116651
2936	Chr5	TAIR10	16154001	16155000	0	-0.792915	-0.149964	-2.96976	-0.966378	-1.29526	-0.698969	0.38476	-1.77193	4.96842	5.12905	3.91773	4.8005	0.27687	0.464923	1.57852e-07	0.0219365	0.0630559	2.25815	0.252723	0.145547	0	0	0	0	0	0	0	0	0	AT5G40380	0	Chr5	16151772	16155177	+	NaN	protein_coding	cysteine-rich RLK (RECEPTOR-like protein kinase) 42	Encodes a cysteine-rich receptor-like protein kinase.	cysteine-rich RLK (RECEPTOR-like protein kinase) 42 (CRK42); FUNCTIONS IN: kinase activity; INVOLVED IN: protein amino acid phosphorylation; LOCATED IN: endomembrane system; EXPRESSED IN: 11 plant structures; EXPRESSED DURING: 7 growth stages; CONTAINS InterPro DOMAIN/s: Protein kinase, ATP binding site (InterPro:IPR017441), Protein kinase, catalytic domain (InterPro:IPR000719), Protein of unknow…	-0.455657	0.227492	-0.188553	0.423199
2571	Chr5	TAIR10	2040001	2041000	0	0.502707	-0.254646	-1.46397	0.531711	-0.277226	0.570809	0.609317	-0.679985	5.84261	5.40641	5.05983	5.98429	0.0875922	0.387775	0.000177264	0.0582535	0.0633201	2.42229	0.366015	3.15393	0	1	0	0	0	0	0	0	1	AT5G06640	0	Chr5	2039859	2041928	-	NaN	protein_coding	Proline-rich extensin-like family protein	---	Proline-rich extensin-like family protein; FUNCTIONS IN: structural constituent of cell wall; INVOLVED IN: plant-type cell wall organization; EXPRESSED IN: shoot apex, hypocotyl, sepal, root, leaf; EXPRESSED DURING: 4 anthesis, LP.12 twelve leaves visible; CONTAINS InterPro DOMAIN/s: Extensin-like repeat (InterPro:IPR006706); BEST Arabidopsis thaliana protein match is: Proline-rich extensin-like …	0	1	0	1
143	Chr1	TAIR10	4689001	4690000	0	0.305897	0.246514	-1.2883	-2.12419	0.0121181	0.269238	-0.651273	-2.45187	5.2061	5.23167	4.61434	4.10537	0.330206	0.380067	0.00546324	4.29173e-05	0.0635183	2.22909	0.311269	1.01243	0	1	0	0	0	0	0	0	0	NaN	NaN	NaN	NaN	NaN	NaN	NaN	NaN	NaN	NaN	NaN	NaN	NaN	NaN	NaN
2411	Chr4	TAIR10	14761001	14762000	0	0.563895	-0.329152	-0.821719	-3.18008	-1.02872	0.495373	-0.13452	-2.48552	4.60925	4.41143	4.12381	2.83424	0.19684	0.404045	0.135267	7.47997e-05	0.0645662	0.42158	0.503384	0.511402	0	0	0	0	0	0	0	0	0	NaN	NaN	NaN	NaN	NaN	NaN	NaN	NaN	NaN	NaN	NaN	NaN	NaN	NaN	NaN
959	Chr2	TAIR10	1130001	1131000	0	0.464584	0.460686	-0.957079	-2.13263	-0.38428	0.407586	0.0352798	-3.88775	5.32263	5.36707	4.8102	4.13923	0.177167	0.174604	0.0287985	3.18194e-05	0.0652017	0.854288	0.605157	0.695194	0	1	0	0	1	0	0	0	0	AT2G03710	0	Chr2	1129268	1131838	+	0	protein_coding	K-box region and MADS-box transcription factor family protein	This gene belongs to the family of SEP genes. It is involved in the development of sepals, petals, stamens and carpels. Additionally, it plays a central role in the determination of flower meristem and organ identity.	SEPALLATA 4 (SEP4); FUNCTIONS IN: DNA binding, sequence-specific DNA binding transcription factor activity; INVOLVED IN: in 6 processes; LOCATED IN: nucleus; EXPRESSED IN: 18 plant structures; EXPRESSED DURING: 13 growth stages; CONTAINS InterPro DOMAIN/s: Transcription factor, MADS-box (InterPro:IPR002100), Transcription factor, K-box (InterPro:IPR002487); BEST Arabidopsis thaliana protein match…	-1.71128	0.00128301	0.746609	0.00389485
3160	Chr5	TAIR10	22837001	22838000	0	0.502745	0.707501	-1.788	-0.330651	-0.0782101	0.573048	-0.153609	-3.81635	6.80813	6.60692	5.85492	6.54167	0.0166521	0.00142466	5.76263e-10	0.147113	0.0652287	1.54906	0.362055	0.620459	0	1	0	0	0	0	0	0	0	AT5G56370	0	Chr5	22835982	22837941	-	0	protein_coding	F-box/RNI-like/FBD-like domains-containing protein	---	F-box/RNI-like/FBD-like domains-containing protein; CONTAINS InterPro DOMAIN/s: FBD (InterPro:IPR013596), F-box domain, cyclin-like (InterPro:IPR001810), F-box domain, Skp2-like (InterPro:IPR022364), FBD-like (InterPro:IPR006566), Leucine-rich repeat 2 (InterPro:IPR013101); BEST Arabidopsis thaliana protein match is: F-box/RNI-like/FBD-like domains-containing protein (TAIR:AT5G56420.2); Has 1807 …	-0.446064	0.73315	2.25598	2.97853e-08
1050	Chr2	TAIR10	7891001	7892000	0	0.504653	0.378359	-1.07853	-1.64944	-0.0407079	0.57734	-0.616915	-3.72021	5.43077	5.39298	4.83859	4.47104	0.133635	0.242764	0.0123996	0.000352448	0.0670545	4.20735	0.550725	0.952957	0	0	0	0	0	0	0	0	0	NaN	NaN	NaN	NaN	NaN	NaN	NaN	NaN	NaN	NaN	NaN	NaN	NaN	NaN	NaN
1313	Chr2	TAIR10	16079001	16080000	0	-0.18755	0.166873	-0.800295	-1.26472	-0.282344	-0.163466	0.228931	-1.4949	5.9938	5.9437	5.82152	5.54623	0.467453	0.406969	0.00895309	6.28185e-05	0.0690043	0.156002	0.302899	0.635816	1	1	0	0	0	0	0	0	0	AT2G38390	0	Chr2	16079681	16081509	+	NaN	protein_coding	Peroxidase superfamily protein	---	Peroxidase superfamily protein; FUNCTIONS IN: peroxidase activity, heme binding; INVOLVED IN: response to salt stress; LOCATED IN: endomembrane system; EXPRESSED IN: root; CONTAINS InterPro DOMAIN/s: Haem peroxidase (InterPro:IPR010255), Plant peroxidase (InterPro:IPR000823), Peroxidases heam-ligand binding site (InterPro:IPR019793), Peroxidase, active site (InterPro:IPR019794), Haem peroxidase, …	-0.405256	0.772282	1.07179	0.140504
1673	Chr3	TAIR10	7714001	7715000	0	0.6916	1.07024	-1.46437	-0.14096	-0.00328392	0.599907	1.07924	-1.41374	5.55534	5.7626	4.68372	5.25712	0.0335439	0.000284658	0.00109399	0.456385	0.0708875	0.00418157	0.0176017	0.967887	2	0	0	0	0	0	0	0	0	AT3G21900	-393	Chr3	7715393	7716343	+	NaN	protein_coding	Receptor-like protein kinase-related family protein	---	Receptor-like protein kinase-related family protein; FUNCTIONS IN: molecular_function unknown; INVOLVED IN: biological_process unknown; LOCATED IN: endomembrane system; CONTAINS InterPro DOMAIN/s: Protein of unknown function DUF26 (InterPro:IPR002902); BEST Arabidopsis thaliana protein match is: Domain of unknown function (DUF26) (TAIR:AT3G21910.1); Has 1211 Blast hits to 1180 proteins in 18 spec…	0	1	0	1
1560	Chr3	TAIR10	4045001	4046000	0	0.119197	0.159563	-0.139079	-1.29361	-0.101348	0.103157	-0.814069	-2.67614	5.81311	5.7214	5.85659	5.23775	0.454255	0.425497	0.441484	0.000253123	0.0714929	1.49214	0.901836	0.855921	0	2	0	0	0	0	0	0	0	AT3G12720	-393	Chr3	4043310	4044609	-	NaN	protein_coding	myb domain protein 67	Member of the R2R3 factor gene family.	myb domain protein 67 (MYB67); FUNCTIONS IN: DNA binding, sequence-specific DNA binding transcription factor activity; INVOLVED IN: regulation of transcription, DNA-dependent, regulation of transcription; CONTAINS InterPro DOMAIN/s: SANT, DNA-binding (InterPro:IPR001005), Homeodomain-like (InterPro:IPR009057), Myb, DNA-binding (InterPro:IPR014778), HTH transcriptional regulator, Myb-type, DNA-bin…	-0.263034	0.831812	-0.263034	0.831812
45	Chr1	TAIR10	1541001	1542000	0	0.272379	0.404193	-1.20717	-0.739368	-0.603035	0.320886	0.113996	-2.7839	6.00955	5.93497	5.46112	5.63759	0.281604	0.150517	0.000399782	0.0190214	0.0814888	0.557868	0.395261	0.10171	0	1	0	0	0	0	0	0	0	AT1G05291	0	Chr1	1541348	1542432	-	NaN	protein_coding	Protein of unknown function (DUF1218)	---	Protein of unknown function (DUF1218); FUNCTIONS IN: molecular_function unknown; INVOLVED IN: biological_process unknown; LOCATED IN: endomembrane system; CONTAINS InterPro DOMAIN/s: Protein of unknown function DUF1218 (InterPro:IPR009606); BEST Arabidopsis thaliana protein match is: Protein of unknown function (DUF1218) (TAIR:AT2G32280.1); Has 30201 Blast hits to 17322 proteins in 780 species: A…	0	1	0	1
2354	Chr4	TAIR10	12674001	12675000	0	0.303195	0.533549	-0.690712	-1.57	-0.449174	0.254929	-0.530051	-3.06545	5.24603	5.40661	4.94229	4.42473	0.328841	0.117234	0.0980654	0.00085948	0.0861699	193.456	0.632561	0.555643	0	1	0	0	1	0	0	0	0	AT4G24540	0	Chr4	12670965	12674072	-	0	protein_coding	AGAMOUS-like 24	Encodes a MADS-box protein involved in flowering. Regulates the expression of SOC1 and is also upregulated by SOC1. Binds with IMK3 kinase domain. Phosphorylated by IMK3; likely to be a target for IMK3 kinase domain.	AGAMOUS-like 24 (AGL24); FUNCTIONS IN: sequence-specific DNA binding, protein homodimerization activity, protein heterodimerization activity, sequence-specific DNA binding transcription factor activity; INVOLVED IN: floral whorl development, maintenance of floral meristem identity, maintenance of inflorescence meristem identity, floral meristem determinacy, regulation of timing of transition from…	-0.743132	0.105266	0.250914	0.331391
2115	Chr4	TAIR10	5362001	5363000	0	1.33595	0.879615	-2.26897	-0.0394425	0.457857	1.59063	2.26874	-2.17804	5.06012	5.04497	3.49188	4.47095	0.00038999	0.0232475	0.000783788	0.497932	0.0869638	0.440943	0.0204572	1.18288	1	0	0	0	0	0	0	0	1	NaN	NaN	NaN	NaN	NaN	NaN	NaN	NaN	NaN	NaN	NaN	NaN	NaN	NaN	NaN
1252	Chr2	TAIR10	13711001	13712000	0	0.264415	-0.599979	-0.845213	-1.39357	-0.501663	0.318325	-0.907839	-3.35664	6.11078	5.54983	5.73876	5.41822	0.27985	0.105219	0.0072272	2.31171e-05	0.0921941	0.204447	0.59798	0.471103	0	1	0	0	0	0	0	0	0	NaN	NaN	NaN	NaN	NaN	NaN	NaN	NaN	NaN	NaN	NaN	NaN	NaN	NaN	NaN
2958	Chr5	TAIR10	17055001	17056000	0	0.200963	-0.0133202	-1.37293	-0.324008	-0.0773837	0.242694	-0.101996	-2.4634	6.1564	5.86601	5.56122	6.03219	0.353754	0.499522	2.53572e-05	0.219068	0.0936398	0.782551	0.284398	0.6175	0	1	0	0	0	0	0	0	0	AT5G42600	0	Chr5	17053517	17058245	+	NaN	protein_coding	marneral synthase	Encodes an oxidosqualene synthase that produces the monocyclic triterpene marneral. Crucial for growth and development.	marneral synthase (MRN1); CONTAINS InterPro DOMAIN/s: Terpene synthase, conserved site (InterPro:IPR002365), Terpenoid cylases/protein prenyltransferase alpha-alpha toroid (InterPro:IPR008930), Squalene cyclase (InterPro:IPR018333), Prenyltransferase/squalene oxidase (InterPro:IPR001330); BEST Arabidopsis thaliana protein match is: Terpenoid cyclases family protein (TAIR:AT1G78500.1); Has 1807 Bl…	-0.137504	1	-0.137504	1
2837	Chr5	TAIR10	9518001	9519000	0	-1.41894	-0.0686637	-1.23042	-0.927567	-0.687642	-1.16793	0.20244	-1.67699	5.99688	6.06687	5.92095	6.03317	0.0105214	0.485606	1.87692e-05	0.00057455	0.097109	1.9967	0.153703	0.148726	0	1	0	0	0	0	0	0	0	NaN	NaN	NaN	NaN	NaN	NaN	NaN	NaN	NaN	NaN	NaN	NaN	NaN	NaN	NaN
542	Chr1	TAIR10	20092001	20093000	0	-0.118589	-0.286363	-1.64106	-1.34383	-1.1477	-0.14426	-0.108474	-2.34094	5.4935	5.34064	4.90762	4.97679	0.490577	0.367781	6.25029e-05	0.000537962	0.0984132	0.452832	0.175851	0.0787831	0	0	0	0	0	0	0	0	0	AT1G53820	0	Chr1	20091491	20092423	+	NaN	protein_coding	RING/U-box superfamily protein	---	RING/U-box superfamily protein; FUNCTIONS IN: zinc ion binding; CONTAINS InterPro DOMAIN/s: Zinc finger, RING-type (InterPro:IPR001841), Zinc finger, C3HC4 RING-type (InterPro:IPR018957); BEST Arabidopsis thaliana protein match is: RING/U-box superfamily protein (TAIR:AT1G72310.1); Has 9301 Blast hits to 9282 proteins in 297 species: Archae - 0; Bacteria - 0; Metazoa - 2391; Fungi - 736; Plants -…	0	1	0	1
288	Chr1	TAIR10	9083001	9084000	0	-0.441074	-0.184678	-1.16482	-1.08215	-0.709443	-0.359928	-0.335397	-2.15482	5.75476	5.64553	5.47328	5.45767	0.364735	0.427014	0.000618088	0.00103205	0.10156	0.290922	0.298405	0.208263	0	1	0	0	0	0	0	0	1	AT1G26250	0	Chr1	9083838	9085464	+	NaN	protein_coding	Proline-rich extensin-like family protein	---	Proline-rich extensin-like family protein; FUNCTIONS IN: structural constituent of cell wall; INVOLVED IN: plant-type cell wall organization; LOCATED IN: endomembrane system; CONTAINS InterPro DOMAIN/s: Extensin-like repeat (InterPro:IPR006706); BEST Arabidopsis thaliana protein match is: Proline-rich extensin-like family protein (TAIR:AT4G08370.1); Has 289174 Blast hits to 44674 proteins in 1767…	-0.378512	0.67764	0.29956	0.711071
3132	Chr5	TAIR10	22073001	22074000	0	0.0913046	0.36996	-0.519141	-1.11639	-0.421785	0.11232	-0.943802	-2.76084	6.07612	6.03746	5.94663	5.60994	0.467337	0.169825	0.0789394	0.000333298	0.102201	2.29742	0.683866	0.452166	0	1	0	0	0	0	0	0	0	NaN	NaN	NaN	NaN	NaN	NaN	NaN	NaN	NaN	NaN	NaN	NaN	NaN	NaN	NaN
1439	Chr2	TAIR10	19412001	19413000	0	-1.16718	-0.259718	-0.488469	-1.42848	0.12201	-0.948644	-0.593534	-1.85234	5.37763	5.4637	5.60581	5.08423	0.0912718	0.379741	0.137582	0.000121641	0.103383	0.392147	0.583147	1.1886	0	0	0	0	0	0	0	0	0	AT2G47270	0	Chr2	19411560	19412151	-	0	protein_coding	sequence-specific DNA binding transcription factors;transcription regulators	Encodes UPBEAT1 (UPB1), a transcription factor with a bHLH domain. Regulates the expression of a set of peroxidases that modulate the balance of reactive oxygen species (ROS) between the zones of cell proliferation and the zone of cell elongation where differentiation begins. Disruption of UPB1 activity alters this ROS balance, leading to a delay in the onset of differentiation.	sequence-specific DNA binding transcription factors;transcription regulators; Has 43 Blast hits to 43 proteins in 10 species: Archae - 0; Bacteria - 0; Metazoa - 0; Fungi - 0; Plants - 43; Viruses - 0; Other Eukaryotes - 0 (source: NCBI BLink).	1.28011	0.0368673	1.89308	0.00358625
980	Chr2	TAIR10	1694001	1695000	0	0.603309	0.428216	-1.30484	-0.424958	-0.555055	0.487521	0.355999	-1.87474	6.71979	6.36174	5.95069	6.35259	0.00498431	0.0817193	4.14766e-06	0.0849476	0.105953	0.091854	0.179353	0.133022	0	1	0	0	0	0	0	0	1	AT2G04830	-355	Chr2	1695355	1695856	+	NaN	protein_coding	Protein of unknown function (DUF295)	---	Protein of unknown function (DUF295); CONTAINS InterPro DOMAIN/s: Protein of unknown function DUF295 (InterPro:IPR005174); BEST Arabidopsis thaliana protein match is: Protein of unknown function (DUF295) (TAIR:AT2G04840.1); Has 68 Blast hits to 68 proteins in 3 species: Archae - 0; Bacteria - 0; Metazoa - 0; Fungi - 0; Plants - 68; Viruses - 0; Other Eukaryotes - 0 (source: NCBI BLink).	0	1	0	1
2551	Chr5	TAIR10	1493001	1494000	0	0.581237	0.219345	-3.64518	-1.40394	-1.16255	0.469659	0.197787	-4.69144	6.0264	5.7378	4.15351	5.16444	0.0355004	0.367316	1.0548e-12	0.000102043	0.105973	0.0514342	0.125533	0.0941266	0	1	0	0	0	0	0	0	0	AT5G05060	0	Chr5	1493719	1495085	-	0	protein_coding	Cystatin/monellin superfamily protein	---	Cystatin/monellin superfamily protein; FUNCTIONS IN: molecular_function unknown; INVOLVED IN: biological_process unknown; LOCATED IN: cellular_component unknown; EXPRESSED IN: male gametophyte, cultured cell, pollen tube; EXPRESSED DURING: L mature pollen stage, M germinated pollen stage; CONTAINS InterPro DOMAIN/s: Cystatin-related, plant (InterPro:IPR006525); BEST Arabidopsis thaliana protein m…	-0.438005	0.303305	1.07762	4.29651e-06
504	Chr1	TAIR10	19266001	19267000	0	0.469852	0.130673	-1.72194	0.721497	0.180266	0.581821	0.31602	-2.17656	5.91963	5.65457	5.02784	6.17486	0.100434	0.450922	1.06446e-05	0.00545797	0.106266	0.413081	0.116675	0.598864	0	1	0	0	0	0	0	0	0	AT1G51870	0	Chr1	19262879	19267001	-	NaN	protein_coding	protein kinase family protein	---	protein kinase family protein; FUNCTIONS IN: protein serine/threonine kinase activity, protein kinase activity, kinase activity, ATP binding; INVOLVED IN: protein amino acid phosphorylation; LOCATED IN: endomembrane system; CONTAINS InterPro DOMAIN/s: Protein kinase, ATP binding site (InterPro:IPR017441), Serine/threonine-protein kinase domain (InterPro:IPR002290), Serine-threonine/tyrosine-prote…	0	1	0.263034	0.831812
3009	Chr5	TAIR10	18284001	18285000	0	0.778079	0.358744	-2.05775	0.152247	-0.0306761	0.963797	1.14735	-1.38086	5.98666	5.70231	4.78063	5.80107	0.00496885	0.223572	1.17492e-06	0.428107	0.106497	0.522916	0.196963	1.48031	0	1	0	0	0	0	0	0	0	AT5G45200	0	Chr5	18283967	18290332	-	NaN	protein_coding	Disease resistance protein (TIR-NBS-LRR class) family	---	Disease resistance protein (TIR-NBS-LRR class) family; FUNCTIONS IN: transmembrane receptor activity, ATP binding; INVOLVED IN: signal transduction, apoptosis, defense response, innate immune response; LOCATED IN: intrinsic to membrane; CONTAINS InterPro DOMAIN/s: NB-ARC (InterPro:IPR002182), Leucine-rich repeat, typical subtype (InterPro:IPR003591), Disease resistance protein (InterPro:IPR000767…	0.106915	1	-0.241008	0.83882
1373	Chr2	TAIR10	17747001	17748000	0	-0.175579	0.366394	-1.62329	-2.49164	-1.72233	-0.141877	-0.328481	-2.1647	5.32858	5.53472	4.76777	4.2486	0.481742	0.236777	0.000170987	3.1718e-07	0.106835	17.4098	0.143006	0.182649	0	1	1	0	0	0	0	0	0	AT2G42610	0	Chr2	17747917	17750440	+	NaN	protein_coding	Protein of unknown function (DUF640)	---	LIGHT SENSITIVE HYPOCOTYLS 10 (LSH10); CONTAINS InterPro DOMAIN/s: Protein of unknown function DUF640 (InterPro:IPR006936); BEST Arabidopsis thaliana protein match is: Protein of unknown function (DUF640) (TAIR:AT1G07090.1); Has 309 Blast hits to 309 proteins in 18 species: Archae - 0; Bacteria - 0; Metazoa - 12; Fungi - 0; Plants - 297; Viruses - 0; Other Eukaryotes - 0 (source: NCBI BLink).	0.0692953	0.860718	0.0135075	0.95944
3262	Chr5	TAIR10	26211001	26212000	0	-1.17896	-0.0865364	0.207917	-1.28424	0.105943	-0.949892	-0.390738	-1.51839	5.24156	5.4383	5.8135	5.02005	0.10308	0.485218	0.373378	0.000805239	0.107705	0.640055	1.31933	1.18183	0	1	0	1	1	0	0	0	0	AT5G65590	0	Chr5	26211746	26213136	-	NaN	protein_coding	Dof-type zinc finger DNA-binding family protein	Encodes a plant-specific Dof-type transcription factor expressed in maturing guard cells, but not in guard mother cells. It regulates essential processes of stomatal guard cell maturation and functions as a key transcription factor regulating the final stages of guard cell differentiation.	Dof-type zinc finger DNA-binding family protein; FUNCTIONS IN: DNA binding, sequence-specific DNA binding transcription factor activity; INVOLVED IN: regulation of transcription; LOCATED IN: chloroplast; CONTAINS InterPro DOMAIN/s: Zinc finger, Dof-type (InterPro:IPR003851); BEST Arabidopsis thaliana protein match is: OBF binding protein 4 (TAIR:AT5G60850.1); Has 1807 Blast hits to 1807 proteins …	-0.0131754	1	0.398549	0.436616
1458	Chr3	TAIR10	467001	468000	0	0.696409	0.257035	0.353614	-1.854	-0.0307876	0.558643	-0.460752	-2.03582	5.2766	5.14194	5.28765	4.11273	0.0522715	0.37782	0.278088	0.000389148	0.109595	3.55838	1.42211	0.968358	0	1	0	0	1	1	1	1	0	AT3G02310	0	Chr3	464279	467074	-	0	protein_coding	K-box region and MADS-box transcription factor family protein	MADS-box protein, binds K domain of AG in vivo	SEPALLATA 2 (SEP2); FUNCTIONS IN: protein binding, DNA binding, sequence-specific DNA binding transcription factor activity; INVOLVED IN: flower development, ovule development; LOCATED IN: nucleus; EXPRESSED IN: 12 plant structures; EXPRESSED DURING: 7 growth stages; CONTAINS InterPro DOMAIN/s: Transcription factor, MADS-box (InterPro:IPR002100), Transcription factor, K-box (InterPro:IPR002487); …	0.387023	0.584665	-0.115477	1
1132	Chr2	TAIR10	10163001	10164000	0	0.403515	0.402775	-2.21253	0.0246062	0.273865	0.510707	0.234667	-2.45082	5.62341	5.59036	4.53292	5.55708	0.19066	0.195544	1.63364e-06	0.498291	0.116993	0.262898	0.051122	0.82956	0	0	0	0	0	0	0	0	0	NaN	NaN	NaN	NaN	NaN	NaN	NaN	NaN	NaN	NaN	NaN	NaN	NaN	NaN	NaN
407	Chr1	TAIR10	13169001	13170000	0	1.34905	0.7824	-2.20991	0.251435	-0.179417	1.06332	1.02833	-2.51464	5.32227	5.19096	3.772	4.8781	7.91075e-05	0.0340746	0.000294706	0.399936	0.118344	0.135669	0.0645265	5.82093	1	1	0	0	0	0	0	0	0	NaN	NaN	NaN	NaN	NaN	NaN	NaN	NaN	NaN	NaN	NaN	NaN	NaN	NaN	NaN
711	Chr1	TAIR10	24428001	24429000	0	0.440039	0.549781	-1.82768	-0.223287	0.201568	0.559126	0.575645	-1.58389	5.83032	5.80748	4.90373	5.62628	0.13312	0.0654508	7.37622e-06	0.371969	0.118949	0.0229408	0.0715014	21.5462	2	0	0	0	0	0	0	0	0	AT1G65681	0	Chr1	24428875	24430670	+	NaN	protein_coding	beta expansin 6	Encodes a beta-expansin EXPB6. Thought to be a pseudogene in Columbia, but a full-length gene in Landsberg erecta (Plant J 44:409-419, 2005). The current gene model on TAIR suggests it may not be a pseudogene in Columbia as previous suggested.	beta expansin 6 (EXPB6); FUNCTIONS IN: molecular_function unknown; INVOLVED IN: sexual reproduction; LOCATED IN: extracellular region; CONTAINS InterPro DOMAIN/s: Pollen allergen, N-terminal (InterPro:IPR014734), Rare lipoprotein A (InterPro:IPR005132), Pollen allergen/expansin, C-terminal (InterPro:IPR007117), Barwin-related endoglucanase (InterPro:IPR009009), Major pollen allergen Lol pI (Inter…	0	1	0	1
3157	Chr5	TAIR10	22834001	22835000	0	0.458546	0.066463	-2.59263	-0.579631	-0.286484	0.360613	0.472023	-2.93354	6.05498	5.72982	4.74811	5.66867	0.0932658	0.486117	8.47424e-10	0.0641887	0.119261	0.750362	0.0617119	0.339245	1	0	0	0	0	0	0	0	0	AT5G56368	0	Chr5	22833964	22834645	+	NaN	protein_coding	---	Encodes a defensin-like (DEFL) family protein.	LOCATED IN: endomembrane system; Has 10 Blast hits to 9 proteins in 6 species: Archae - 0; Bacteria - 0; Metazoa - 6; Fungi - 1; Plants - 3; Viruses - 0; Other Eukaryotes - 0 (source: NCBI BLink).	0	1	0	1
1418	Chr2	TAIR10	18810001	18811000	0	-0.702109	-0.876295	-0.593703	-1.93598	-0.73067	-0.55142	-1.26428	-2.82765	5.39972	5.12157	5.46247	4.73405	0.267654	0.0422539	0.0889984	3.03628e-06	0.120403	0.181423	0.653324	0.452332	0	1	0	1	1	0	0	0	0	AT2G45660	0	Chr2	18807538	18811047	-	0	protein_coding	AGAMOUS-like 20	Controls flowering and is required for CO to promote flowering. It acts downstream of FT. Overexpression of (SOC1) AGL20 suppresses not only the late flowering of plants that have functional FRI and FLC alleles but also the delayed phase transitions during the vegetative stages of development. AGL20/SOC1 acts with AGL24 to promote flowering and inflorescence meristem identity.AGL20 upregulates ex…	AGAMOUS-like 20 (AGL20); FUNCTIONS IN: sequence-specific DNA binding transcription factor activity; INVOLVED IN: flower development, response to cold, positive regulation of flower development, maintenance of inflorescence meristem identity; LOCATED IN: nucleus; EXPRESSED IN: 22 plant structures; EXPRESSED DURING: 12 growth stages; CONTAINS InterPro DOMAIN/s: Transcription factor, MADS-box (Inter…	0.19885	0.619126	-0.0728789	0.777191
1251	Chr2	TAIR10	13710001	13711000	0	0.186719	0.13296	-0.629191	-1.61959	-0.321938	0.146354	-0.333418	-2.85088	6.47529	6.18655	6.23986	5.7182	0.344476	0.428355	0.0180285	3.06372e-08	0.120465	2.35001	0.638771	0.669056	0	1	0	0	0	0	0	0	0	AT2G32275	0	Chr2	13709604	13710356	+	NaN	protein_coding	Expressed protein	---	Expressed protein; FUNCTIONS IN: molecular_function unknown; INVOLVED IN: biological_process unknown; LOCATED IN: plasma membrane; Has 35333 Blast hits to 34131 proteins in 2444 species: Archae - 798; Bacteria - 22429; Metazoa - 974; Fungi - 991; Plants - 531; Viruses - 0; Other Eukaryotes - 9610 (source: NCBI BLink).	0	1	0.263034	0.831812
2826	Chr5	TAIR10	9105001	9106000	0	1.07857	0.495447	-1.63249	0.277034	0.170195	0.845924	0.783343	-1.71712	6.21484	5.82999	5.06183	5.94326	1.5503e-05	0.0934451	2.51714e-05	0.283548	0.12076	0.22478	0.0252799	0.237828	1	0	0	0	0	0	0	0	0	AT5G26060	0	Chr5	9104847	9105524	-	NaN	protein_coding	Plant self-incompatibility protein S1 family	---	Plant self-incompatibility protein S1 family; FUNCTIONS IN: molecular_function unknown; INVOLVED IN: biological_process unknown; LOCATED IN: endomembrane system; EXPRESSED IN: 9 plant structures; EXPRESSED DURING: L mature pollen stage, M germinated pollen stage, 4 anthesis, C globular stage, petal differentiation and expansion stage; CONTAINS InterPro DOMAIN/s: Plant self-incompatibility S1 (Int…	0	1	0	1
2016	Chr3	TAIR10	22351001	22352000	0	-0.93365	-1.16979	-1.56258	-2.27839	-1.2764	-0.723602	-0.886028	-3.03569	4.76048	4.55022	4.42411	3.9676	0.245946	0.0258112	0.00147392	2.76785e-05	0.126898	0.138165	0.3205	0.282028	0	0	0	0	0	0	0	0	0	NaN	NaN	NaN	NaN	NaN	NaN	NaN	NaN	NaN	NaN	NaN	NaN	NaN	NaN	NaN
1946	Chr3	TAIR10	19565001	19566000	0	-0.452662	-0.125	-0.19854	-2.30252	0.635463	-0.34746	-0.860635	-1.77751	4.55995	4.76425	4.76399	3.6271	0.432455	0.480758	0.443931	0.000184	0.131811	0.747874	0.799864	1.76449	0	0	0	0	0	0	0	0	0	AT3G52790	0	Chr3	19565867	19566354	-	NaN	protein_coding	peptidoglycan-binding LysM domain-containing protein	---	peptidoglycan-binding LysM domain-containing protein; FUNCTIONS IN: molecular_function unknown; INVOLVED IN: cell wall macromolecule catabolic process; LOCATED IN: endomembrane system; CONTAINS InterPro DOMAIN/s: Peptidoglycan-binding lysin domain (InterPro:IPR018392); BEST Arabidopsis thaliana protein match is: peptidoglycan-binding LysM domain-containing protein (TAIR:AT4G25433.1); Has 63 Blast…	0	1	0.222392	0.845019
722	Chr1	TAIR10	24575001	24576000	0	0.353045	0.559503	-1.354	0.190477	-0.0197954	0.466147	0.434951	-2.0797	5.8673	5.87362	5.21072	5.91557	0.20865	0.0551448	0.000264711	0.384351	0.13773	0.124995	0.211469	1.21769	1	1	0	0	0	0	0	0	0	AT1G66000	0	Chr1	24574344	24575438	+	NaN	protein_coding	Family of unknown function (DUF577)	---	Family of unknown function (DUF577); CONTAINS InterPro DOMAIN/s: Protein of unknown function DUF577 (InterPro:IPR007598); BEST Arabidopsis thaliana protein match is: Family of unknown function (DUF577) (TAIR:AT1G66060.1); Has 82 Blast hits to 52 proteins in 2 species: Archae - 0; Bacteria - 0; Metazoa - 0; Fungi - 0; Plants - 82; Viruses - 0; Other Eukaryotes - 0 (source: NCBI BLink).	0	1	0	1
629	Chr1	TAIR10	22745001	22746000	0	0.707512	0.435018	-2.07783	-0.381637	-0.828081	0.936348	0.904913	-2.55569	6.32443	6.02447	5.13838	5.9161	0.00403891	0.11386	2.20629e-08	0.173857	0.139037	0.350163	0.103175	0.369659	0	1	0	0	0	0	0	0	0	AT1G61630	0	Chr1	22744207	22746111	+	NaN	protein_coding	equilibrative nucleoside transporter 7	---	equilibrative nucleoside transporter 7 (ENT7); FUNCTIONS IN: nucleoside transmembrane transporter activity; INVOLVED IN: transport; LOCATED IN: plasma membrane; EXPRESSED IN: petal, leaf whorl, sperm cell, sepal, flower; EXPRESSED DURING: 4 anthesis, petal differentiation and expansion stage; CONTAINS InterPro DOMAIN/s: Delayed-early response protein/equilibrative nucleoside transporter (InterPro…	0	1	0	1
1068	Chr2	TAIR10	8244001	8245000	0	0.494581	0.416346	-1.63534	-0.148587	-0.209044	0.656375	0.985148	-1.58485	5.54365	5.50175	4.68702	5.3422	0.126991	0.194652	0.000235871	0.449004	0.14033	0.405276	0.0156882	0.17	0	0	0	0	0	0	0	0	0	AT2G19010	0	Chr2	8243089	8245378	+	NaN	protein_coding	GDSL-like Lipase/Acylhydrolase superfamily protein	---	GDSL-like Lipase/Acylhydrolase superfamily protein; FUNCTIONS IN: lipase activity, hydrolase activity, acting on ester bonds; INVOLVED IN: lipid metabolic process; LOCATED IN: endomembrane system; EXPRESSED IN: 6 plant structures; EXPRESSED DURING: L mature pollen stage, M germinated pollen stage, 4 anthesis, petal differentiation and expansion stage; CONTAINS InterPro DOMAIN/s: Lipase, GDSL (Int…	0	1	0	1
1507	Chr3	TAIR10	2830001	2831000	0	-0.0895889	0.211732	-0.279316	-1.15388	-0.419386	-0.118658	-0.475321	-2.4544	5.72817	5.74525	5.78627	5.3046	0.493653	0.374566	0.309967	0.000897453	0.140944	2.62646	0.796233	0.467455	0	2	0	0	0	0	0	0	0	AT3G09220	0	Chr3	2827239	2830542	-	NaN	protein_coding	laccase 7	putative laccase, a member of laccase family of genes (17 members in Arabidopsis).	laccase 7 (LAC7); FUNCTIONS IN: laccase activity; INVOLVED IN: oxidation reduction, lignin catabolic process; LOCATED IN: endomembrane system, apoplast; EXPRESSED IN: 18 plant structures; EXPRESSED DURING: 7 growth stages; CONTAINS InterPro DOMAIN/s: Multicopper oxidase, type 3 (InterPro:IPR011707), Cupredoxin (InterPro:IPR008972), Laccase (InterPro:IPR017761), Multicopper oxidase, type 2 (InterP…	0	1	0	1
3103	Chr5	TAIR10	21189001	21190000	0	0.497588	-0.22459	-2.7299	-0.192592	0.227408	0.663434	0.957028	-2.92982	5.11406	4.86686	3.73623	4.8788	0.17851	0.436408	7.40968e-06	0.438574	0.1426	1.60887	0.0353367	11.408	0	2	0	0	0	0	0	0	0	AT5G52150	0	Chr5	21189988	21191303	-	NaN	protein_coding	RING/U-box superfamily protein	---	RING/U-box superfamily protein; FUNCTIONS IN: zinc ion binding; CONTAINS InterPro DOMAIN/s: Zinc finger, RING-type (InterPro:IPR001841), Zinc finger, C3HC4 RING-type (InterPro:IPR018957); BEST Arabidopsis thaliana protein match is: RING/U-box superfamily protein (TAIR:AT5G52140.1); Has 5320 Blast hits to 5310 proteins in 208 species: Archae - 0; Bacteria - 0; Metazoa - 1777; Fungi - 300; Plants -…	0	1	0	1
534	Chr1	TAIR10	19909001	19910000	0	0.133148	0.372877	-1.07646	-1.65441	-1.32359	0.178776	0.437757	-2.29778	5.90923	5.89593	5.49372	5.14863	0.439939	0.184966	0.00151442	4.23778e-06	0.145348	0.0798387	0.362167	0.11116	0	1	0	0	0	0	0	0	0	AT1G53366	0	Chr1	19909840	19909977	-	NaN	protein_coding	---	---	unknown protein; Has 30201 Blast hits to 17322 proteins in 780 species: Archae - 12; Bacteria - 1396; Metazoa - 17338; Fungi - 3422; Plants - 5037; Viruses - 0; Other Eukaryotes - 2996 (source: NCBI BLink).	0	1	0	1
2998	Chr5	TAIR10	17779001	17780000	0	0.63671	0.462468	-1.27931	-0.497547	-0.469993	0.47428	0.199792	-2.72017	6.1806	5.95564	5.41549	5.74712	0.0146213	0.10152	0.000213092	0.101246	0.14594	0.395442	0.360441	0.0285366	0	1	0	0	0	0	0	0	0	AT5G44170	-378	Chr5	17780378	17781283	+	NaN	protein_coding	S-adenosyl-L-methionine-dependent methyltransferases superfamily protein	---	S-adenosyl-L-methionine-dependent methyltransferases superfamily protein; CONTAINS InterPro DOMAIN/s: Methyltransferase-16, putative (InterPro:IPR019410); BEST Arabidopsis thaliana protein match is: S-adenosyl-L-methionine-dependent methyltransferases superfamily protein (TAIR:AT1G08125.1); Has 872 Blast hits to 871 proteins in 146 species: Archae - 0; Bacteria - 8; Metazoa - 297; Fungi - 242; Pl…	0.164016	0.80247	-0.0590947	0.88411
518	Chr1	TAIR10	19389001	19390000	0	0.542557	0.413871	-2.21611	-0.314936	0.16295	0.731634	1.03288	-1.84442	5.33275	5.32168	4.17648	5.01852	0.120257	0.219594	2.51248e-05	0.339832	0.148158	0.42727	0.0915804	3.1862	0	0	0	0	0	0	0	0	0	AT1G52110	0	Chr1	19386789	19389740	-	NaN	protein_coding	Mannose-binding lectin superfamily protein	---	Mannose-binding lectin superfamily protein; CONTAINS InterPro DOMAIN/s: Mannose-binding lectin (InterPro:IPR001229); BEST Arabidopsis thaliana protein match is: Mannose-binding lectin superfamily protein (TAIR:AT5G49870.1); Has 1710 Blast hits to 593 proteins in 35 species: Archae - 0; Bacteria - 0; Metazoa - 0; Fungi - 0; Plants - 1709; Viruses - 0; Other Eukaryotes - 1 (source: NCBI BLink).	0	1	0	1
2377	Chr4	TAIR10	13712001	13713000	0	0.328685	0.355375	-2.15261	-0.990924	-1.14243	0.443602	0.678	-2.59458	6.32855	6.13199	5.29302	5.8096	0.176219	0.172563	8.08777e-10	0.000669156	0.148417	0.311602	0.0931425	0.0710823	0	1	1	1	1	0	0	0	1	AT4G27420	0	Chr4	13712199	13714797	-	NaN	protein_coding	ABC-2 type transporter family protein	---	ABC-2 type transporter family protein; FUNCTIONS IN: ATPase activity, coupled to transmembrane movement of substances; LOCATED IN: membrane; EXPRESSED IN: petal, leaf whorl, sepal, flower, egg cell; EXPRESSED DURING: 4 anthesis, petal differentiation and expansion stage; CONTAINS InterPro DOMAIN/s: ATPase, AAA+ type, core (InterPro:IPR003593), ABC transporter-like (InterPro:IPR003439), ABC-2 type…	0	1	0.263034	0.831812
2114	Chr4	TAIR10	5361001	5362000	0	1.28821	1.60677	-3.12298	0.883611	0.456246	1.7425	2.24899	0.960541	5.69725	5.91179	3.73228	5.60927	1.60341e-05	3.80957e-09	2.30651e-07	0.00513503	0.149795	0.166475	1.89013	0.318488	1	2	0	0	0	0	0	0	1	NaN	NaN	NaN	NaN	NaN	NaN	NaN	NaN	NaN	NaN	NaN	NaN	NaN	NaN	NaN
2673	Chr5	TAIR10	4893001	4894000	0	0.771363	0.418179	-1.57948	-0.432479	-0.607566	1.04965	0.614024	-2.52715	6.27559	5.95456	5.29843	5.80798	0.00196901	0.135909	9.10285e-06	0.14202	0.152651	0.189369	0.230879	0.168669	0	0	0	0	0	0	0	0	0	AT5G15100	0	Chr5	4892159	4893937	-	NaN	protein_coding	Auxin efflux carrier family protein	Encodes an auxin transporter with a strong expression in a male gametophyte. Mutant studies reveal a role for auxin transport in regulating pollen development and function. It acts together with PIN5.	PIN-FORMED 8 (PIN8); FUNCTIONS IN: auxin:hydrogen symporter activity, transporter activity; INVOLVED IN: auxin polar transport, transmembrane transport; LOCATED IN: endomembrane system, integral to membrane; EXPRESSED IN: 9 plant structures; EXPRESSED DURING: 6 growth stages; CONTAINS InterPro DOMAIN/s: Auxin efflux carrier, subgroup (InterPro:IPR014024), Auxin efflux carrier (InterPro:IPR004776)…	-0.115477	1	0.691878	0.229481
1940	Chr3	TAIR10	19470001	19471000	0	0.646528	0.457534	-3.47643	-1.29303	-1.24133	0.881055	1.78247	-1.35107	4.70377	4.82507	2.89991	3.83225	0.13512	0.24515	1.82532e-05	0.0285787	0.153328	0.590961	0.440443	0.0204153	0	1	0	0	0	0	0	0	0	AT3G52510	0	Chr3	19469652	19470378	-	NaN	protein_coding	F-box associated ubiquitination effector family protein	---	F-box associated ubiquitination effector family protein; CONTAINS InterPro DOMAIN/s: F-box associated domain, type 3 (InterPro:IPR013187), F-box associated interaction domain (InterPro:IPR017451); BEST Arabidopsis thaliana protein match is: F-box and associated interaction domains-containing protein (TAIR:AT3G52320.1); Has 431 Blast hits to 421 proteins in 3 species: Archae - 0; Bacteria - 0; Met…	0.0995357	1	-0.347923	0.690038
977	Chr2	TAIR10	1689001	1690000	0	0.552373	0.647516	-1.58004	-0.615952	-0.85635	0.753714	0.753126	-2.36528	6.09621	6.01602	5.22933	5.64469	0.0407438	0.0192096	1.50516e-05	0.0511466	0.15392	0.0752938	0.19913	0.163503	0	1	0	0	0	0	0	0	0	AT2G04810	0	Chr2	1688773	1689966	+	NaN	protein_coding	Protein of unknown function (DUF295)	---	Protein of unknown function (DUF295); CONTAINS InterPro DOMAIN/s: Protein of unknown function DUF295 (InterPro:IPR005174); BEST Arabidopsis thaliana protein match is: Protein of unknown function (DUF295) (TAIR:AT2G04840.1); Has 335 Blast hits to 324 proteins in 11 species: Archae - 0; Bacteria - 0; Metazoa - 0; Fungi - 0; Plants - 335; Viruses - 0; Other Eukaryotes - 0 (source: NCBI BLink).	0	1	0	1
1437	Chr2	TAIR10	19404001	19405000	0	-3.19939	-0.90147	-1.58321	-3.10327	-0.640129	-2.33566	-1.30352	-1.8626	3.6719	4.27038	3.89997	3.02054	0.00989666	0.117339	0.00780698	3.63232e-05	0.156102	0.182501	0.0811297	0.658347	0	1	0	0	1	0	0	0	0	AT2G47260	0	Chr2	19404820	19407084	-	NaN	protein_coding	WRKY DNA-binding protein 23	Encodes a member of WRKY Transcription Factor; Group I. Involved in nematode feeding site establishment.	WRKY DNA-binding protein 23 (WRKY23); CONTAINS InterPro DOMAIN/s: DNA-binding WRKY (InterPro:IPR003657), Transcription factor, WRKY group IIc (InterPro:IPR017396); BEST Arabidopsis thaliana protein match is: WRKY family transcription factor (TAIR:AT3G62340.1); Has 3541 Blast hits to 3088 proteins in 202 species: Archae - 0; Bacteria - 3; Metazoa - 11; Fungi - 7; Plants - 3503; Viruses - 0; Other …	0.969626	0.0723452	-0.222392	0.549956
507	Chr1	TAIR10	19280001	19281000	0	0.248291	0.23243	-1.17099	-0.335007	0.119874	0.180598	0.151134	-2.82715	5.91552	5.78667	5.39778	5.75583	0.319786	0.349464	0.00081285	0.241337	0.157103	0.21085	0.414441	2.13426	1	2	0	0	0	0	0	0	0	AT1G51900	0	Chr1	19279884	19282895	-	NaN	protein_coding	Regulator of Vps4 activity in the MVB pathway protein	---	Regulator of Vps4 activity in the MVB pathway protein; FUNCTIONS IN: molecular_function unknown; INVOLVED IN: biological_process unknown; LOCATED IN: mitochondrion; CONTAINS InterPro DOMAIN/s: Protein of unknown function DUF292, eukaryotic (InterPro:IPR005061); BEST Arabidopsis thaliana protein match is: Regulator of Vps4 activity in the MVB pathway protein (TAIR:AT2G14830.1); Has 11301 Blast hit…	0	1	0	1
2749	Chr5	TAIR10	7354001	7355000	0	0.381233	0.107208	-2.34655	-0.38608	-0.698207	0.524103	0.970095	-2.1165	5.36514	5.25442	4.2251	5.0987	0.243494	0.474334	5.12181e-06	0.270729	0.157461	0.799485	0.0515678	0.288396	0	0	0	0	0	0	0	0	0	AT5G22190	0	Chr5	7354164	7354688	+	NaN	protein_coding	---	---	unknown protein; BEST Arabidopsis thaliana protein match is: unknown protein (TAIR:AT5G22160.1); Has 30201 Blast hits to 17322 proteins in 780 species: Archae - 12; Bacteria - 1396; Metazoa - 17338; Fungi - 3422; Plants - 5037; Viruses - 0; Other Eukaryotes - 2996 (source: NCBI BLink).	0	1	0	1
2893	Chr5	TAIR10	15159001	15160000	0	0.771558	0.792529	-1.49566	0.41189	0.106042	1.06508	0.964212	-2.11769	6.10667	6.01306	5.17227	6.05711	0.00362132	0.00382649	6.3896e-05	0.128737	0.159643	0.0976168	0.172241	0.588247	0	2	0	0	0	0	0	0	1	AT5G38010	0	Chr5	15158275	15160212	+	0	protein_coding	UDP-Glycosyltransferase superfamily protein	---	UDP-Glycosyltransferase superfamily protein; FUNCTIONS IN: UDP-glycosyltransferase activity, transferase activity, transferring glycosyl groups; INVOLVED IN: metabolic process; LOCATED IN: cellular_component unknown; CONTAINS InterPro DOMAIN/s: UDP-glucuronosyl/UDP-glucosyltransferase (InterPro:IPR002213); BEST Arabidopsis thaliana protein match is: UDP-Glycosyltransferase superfamily protein (TA…	-0.331621	0.767443	1.36257	0.00160084
78	Chr1	TAIR10	2906001	2907000	0	0.0908797	0.18104	-1.36089	-1.31246	-0.672837	0.126085	-0.459121	-3.4333	5.83393	5.75877	5.30363	5.26414	0.472492	0.404013	0.000147622	0.000175335	0.16078	2.31875	0.432456	0.322505	1	2	0	0	0	0	0	0	0	AT1G09026	-124	Chr1	2907124	2907279	+	NaN	protein_coding	---	---	unknown protein; LOCATED IN: endomembrane system; Has 30201 Blast hits to 17322 proteins in 780 species: Archae - 12; Bacteria - 1396; Metazoa - 17338; Fungi - 3422; Plants - 5037; Viruses - 0; Other Eukaryotes - 2996 (source: NCBI BLink).	0	1	0	1
404	Chr1	TAIR10	12965001	12966000	0	0.676725	0.818416	-1.0801	-0.218725	-0.12911	0.936587	1.2777	-0.675968	6.52164	6.37803	5.82744	6.21523	0.0031916	0.000620392	0.000318619	0.326253	0.160874	0.218903	0.230396	0.259127	0	0	0	0	0	0	0	0	1	AT1G35330	0	Chr1	12965046	12966113	+	NaN	protein_coding	RING/U-box superfamily protein	---	RING/U-box superfamily protein; FUNCTIONS IN: zinc ion binding; LOCATED IN: endomembrane system; EXPRESSED IN: root; CONTAINS InterPro DOMAIN/s: Zinc finger, RING-type (InterPro:IPR001841), Zinc finger, C3HC4 RING-type (InterPro:IPR018957); BEST Arabidopsis thaliana protein match is: RING/U-box superfamily protein (TAIR:AT4G09120.1); Has 10408 Blast hits to 10377 proteins in 292 species: Archae -…	0	1	0	1
1214	Chr2	TAIR10	12527001	12528000	0	0.206871	-0.00147487	-1.64297	-0.395784	-0.485184	0.287328	0.0940387	-2.21037	5.64955	5.48308	4.92931	5.47432	0.386285	0.499996	5.33933e-05	0.216621	0.162147	1.01004	0.147323	0.10171	1	0	0	0	0	0	0	0	0	AT2G29130	0	Chr2	12524889	12527747	-	0	protein_coding	laccase 2	putative laccase, knockout mutant had reduced root elongation under PEG-induced dehydration	laccase 2 (LAC2); FUNCTIONS IN: laccase activity; INVOLVED IN: response to water deprivation; LOCATED IN: endomembrane system, apoplast; EXPRESSED IN: 6 plant structures; EXPRESSED DURING: petal differentiation and expansion stage; CONTAINS InterPro DOMAIN/s: Multicopper oxidase, type 3 (InterPro:IPR011707), Laccase (InterPro:IPR017761), Multicopper oxidase, type 2 (InterPro:IPR011706), Cupredoxi…	0.459432	0.417692	1.32193	0.0138596
2959	Chr5	TAIR10	17056001	17057000	0	0.353039	0.549768	-1.22167	0.066571	0.0125125	0.493996	-0.0214685	-2.74814	6.21465	6.1332	5.61643	6.20927	0.164479	0.0391108	0.000146687	0.48069	0.16602	1.0772	0.384712	0.666702	0	1	0	0	0	0	0	0	0	AT5G42600	0	Chr5	17053517	17058245	+	NaN	protein_coding	marneral synthase	Encodes an oxidosqualene synthase that produces the monocyclic triterpene marneral. Crucial for growth and development.	marneral synthase (MRN1); CONTAINS InterPro DOMAIN/s: Terpene synthase, conserved site (InterPro:IPR002365), Terpenoid cylases/protein prenyltransferase alpha-alpha toroid (InterPro:IPR008930), Squalene cyclase (InterPro:IPR018333), Prenyltransferase/squalene oxidase (InterPro:IPR001330); BEST Arabidopsis thaliana protein match is: Terpenoid cyclases family protein (TAIR:AT1G78500.1); Has 1807 Bl…	-0.137504	1	-0.137504	1
2515	Chr5	TAIR10	397001	398000	0	-1.30158	0.00937759	0.0653033	-1.32528	-1.21761	-0.930157	-0.0395679	-0.718193	6.2723	6.28903	6.7875	6.08627	0.00979997	0.499587	0.472493	2.95275e-07	0.166576	1.73625	1.20373	0.0423739	0	1	0	0	1	0	0	0	0	AT5G02030	0	Chr5	395634	399041	+	1	protein_coding	POX (plant homeobox) family protein	Mutant has additional lateral organs and phyllotaxy defect. Encodes a homeodomain transcription factor. Has sequence similarity to the Arabidopsis ovule development regulator Bell1. Binds directly to the AGAMOUS cis-regulatory element. Its localization to the nucleus is dependent on the coexpression of either STM or BP.	REPLUMLESS (RPL); CONTAINS InterPro DOMAIN/s: Homeobox (InterPro:IPR001356), Homeodomain-like (InterPro:IPR009057), POX (InterPro:IPR006563), Homeodomain-related (InterPro:IPR012287); BEST Arabidopsis thaliana protein match is: BEL1-like homeodomain 8 (TAIR:AT2G27990.1); Has 5109 Blast hits to 5109 proteins in 341 species: Archae - 0; Bacteria - 2; Metazoa - 2052; Fungi - 344; Plants - 2481; Viru…	0.652077	0.164802	0.0983764	0.745634
1344	Chr2	TAIR10	17030001	17031000	0	-0.485771	0.191189	-0.707424	-1.49609	-0.165179	-0.34722	-1.24768	-3.84754	5.13763	5.36079	5.09641	4.63027	0.389616	0.417462	0.074679	0.00063767	0.166729	1.36452	0.689686	0.802107	0	1	0	0	1	0	0	0	0	NaN	NaN	NaN	NaN	NaN	NaN	NaN	NaN	NaN	NaN	NaN	NaN	NaN	NaN	NaN
1818	Chr3	TAIR10	11949001	11950000	0	0.750546	0.503681	-1.75511	-0.471331	0.0882695	1.05582	0.265936	-3.23324	5.4981	5.4133	4.45853	5.00314	0.0234862	0.136458	0.000267672	0.212484	0.168811	0.308113	0.296435	1.46853	0	1	0	0	0	0	0	0	0	NaN	NaN	NaN	NaN	NaN	NaN	NaN	NaN	NaN	NaN	NaN	NaN	NaN	NaN	NaN
511	Chr1	TAIR10	19356001	19357000	0	0.568439	0.475513	-2.37645	0.00895503	0.650571	0.401728	0.271138	-2.53342	5.32061	5.33341	4.07469	5.15479	0.10601	0.16726	1.22197e-05	0.499828	0.171484	0.272992	0.0319844	0.969903	0	0	0	0	0	0	0	0	0	AT1G52050	0	Chr1	19354919	19356764	-	NaN	protein_coding	Mannose-binding lectin superfamily protein	---	Mannose-binding lectin superfamily protein; FUNCTIONS IN: molecular_function unknown; INVOLVED IN: biological_process unknown; LOCATED IN: endomembrane system; EXPRESSED IN: 7 plant structures; EXPRESSED DURING: 4 anthesis, E expanded cotyledon stage; CONTAINS InterPro DOMAIN/s: Mannose-binding lectin (InterPro:IPR001229); BEST Arabidopsis thaliana protein match is: Mannose-binding lectin superfa…	0	1	0.137504	1
454	Chr1	TAIR10	17692001	17693000	0	0.39339	0.360739	-1.65652	-0.32199	-0.0477125	0.558091	0.240366	-2.65662	6.47498	6.22153	5.64388	6.26088	0.09569	0.155744	1.18488e-07	0.192412	0.172737	0.199589	0.231981	0.745922	0	2	0	0	0	0	0	0	0	AT1G47980	0	Chr1	17691834	17693867	-	NaN	protein_coding	---	---	unknown protein; FUNCTIONS IN: molecular_function unknown; INVOLVED IN: biological_process unknown; LOCATED IN: endomembrane system; EXPRESSED IN: 6 plant structures; EXPRESSED DURING: 4 anthesis, F mature embryo stage, petal differentiation and expansion stage, E expanded cotyledon stage; BEST Arabidopsis thaliana protein match is: unknown protein (TAIR:AT3G62730.1); Has 169 Blast hits to 169 pr…	-0.137504	1	0.447459	0.557197
3137	Chr5	TAIR10	22162001	22163000	0	-0.25987	-0.513884	-1.51052	-0.77949	-1.39869	-0.368121	0.252398	-1.42264	5.21284	5.05406	4.72875	5.00775	0.463775	0.222241	0.000600719	0.0477727	0.172927	2.95308	0.0299814	0.284534	0	0	0	0	0	0	0	0	1	AT5G54560	0	Chr5	22161134	22162216	+	NaN	protein_coding	Protein of unknown function (DUF295)	---	Protein of unknown function (DUF295); CONTAINS InterPro DOMAIN/s: Protein of unknown function DUF295 (InterPro:IPR005174); BEST Arabidopsis thaliana protein match is: Protein of unknown function (DUF295) (TAIR:AT5G54550.1); Has 1807 Blast hits to 1807 proteins in 277 species: Archae - 0; Bacteria - 0; Metazoa - 736; Fungi - 347; Plants - 385; Viruses - 0; Other Eukaryotes - 339 (source: NCBI BLin…	0	1	-0.378512	0.67764
1688	Chr3	TAIR10	7757001	7758000	0	0.146043	0.107852	-2.21223	0.0257126	0.354219	0.207885	0.54394	-2.55856	5.94083	5.78257	4.97246	6.01445	0.427194	0.462987	1.82519e-08	0.49744	0.173749	0.667012	0.0726254	0.860118	0	0	0	0	0	0	0	0	0	AT3G22022	0	Chr3	7757829	7758032	+	NaN	protein_coding	---	---	unknown protein; Has 30201 Blast hits to 17322 proteins in 780 species: Archae - 12; Bacteria - 1396; Metazoa - 17338; Fungi - 3422; Plants - 5037; Viruses - 0; Other Eukaryotes - 2996 (source: NCBI BLink).	0	1	0	1
1080	Chr2	TAIR10	8664001	8665000	0	0.307193	0.319081	-1.52182	-0.782931	-0.297276	0.437119	0.0842304	-2.08733	6.14266	5.9805	5.4238	5.73428	0.224479	0.231008	7.94513e-06	0.00992299	0.174091	0.579432	0.156776	0.450429	0	2	0	0	0	0	0	0	0	AT2G20080	0	Chr2	8662930	8665026	-	NaN	protein_coding	---	---	unknown protein; FUNCTIONS IN: molecular_function unknown; INVOLVED IN: biological_process unknown; LOCATED IN: chloroplast; BEST Arabidopsis thaliana protein match is: unknown protein (TAIR:AT4G28840.1); Has 35333 Blast hits to 34131 proteins in 2444 species: Archae - 798; Bacteria - 22429; Metazoa - 974; Fungi - 991; Plants - 531; Viruses - 0; Other Eukaryotes - 9610 (source: NCBI BLink).	0	1	0.137504	1
3070	Chr5	TAIR10	20227001	20228000	0	0.424162	0.087797	-1.29206	0.314121	0.117142	0.605274	0.58018	-2.21739	5.87844	5.61917	5.21645	5.95239	0.140235	0.477756	0.000505923	0.240018	0.175592	0.734925	0.26382	0.454641	0	1	0	0	0	0	0	0	0	AT5G49770	0	Chr5	20222669	20227267	+	NaN	protein_coding	Leucine-rich repeat protein kinase family protein	---	Leucine-rich repeat protein kinase family protein; FUNCTIONS IN: protein serine/threonine kinase activity, protein kinase activity, ATP binding; INVOLVED IN: transmembrane receptor protein tyrosine kinase signaling pathway, protein amino acid phosphorylation; LOCATED IN: endomembrane system; EXPRESSED IN: sperm cell, root; CONTAINS InterPro DOMAIN/s: Protein kinase, ATP binding site (InterPro:IPR…	-0.36257	0.596615	0.152003	0.871415
2960	Chr5	TAIR10	17057001	17058000	0	0.454159	0.566746	-1.09665	0.296863	0.295402	0.648577	0.115413	-2.34999	6.72589	6.49242	6.13022	6.7961	0.0363129	0.0155013	4.31672e-05	0.154202	0.175986	0.659689	0.363849	0.00245861	0	1	0	0	0	0	0	0	0	AT5G42600	0	Chr5	17053517	17058245	+	NaN	protein_coding	marneral synthase	Encodes an oxidosqualene synthase that produces the monocyclic triterpene marneral. Crucial for growth and development.	marneral synthase (MRN1); CONTAINS InterPro DOMAIN/s: Terpene synthase, conserved site (InterPro:IPR002365), Terpenoid cylases/protein prenyltransferase alpha-alpha toroid (InterPro:IPR008930), Squalene cyclase (InterPro:IPR018333), Prenyltransferase/squalene oxidase (InterPro:IPR001330); BEST Arabidopsis thaliana protein match is: Terpenoid cyclases family protein (TAIR:AT1G78500.1); Has 1807 Bl…	-0.137504	1	-0.137504	1
498	Chr1	TAIR10	19015001	19016000	0	0.540549	0.362823	-1.30342	-0.117316	-0.656653	0.772648	0.426608	-2.32041	6.47949	6.16998	5.74561	6.29249	0.0218204	0.16015	1.99823e-05	0.439233	0.176475	0.0805945	0.280793	0.698652	0	1	0	0	0	0	0	0	0	AT1G51300	0	Chr1	19014260	19016103	-	NaN	protein_coding	alpha/beta-Hydrolases superfamily protein	---	alpha/beta-Hydrolases superfamily protein; FUNCTIONS IN: hydrolase activity; INVOLVED IN: biological_process unknown; LOCATED IN: cellular_component unknown; EXPRESSED IN: embryo, pedicel; EXPRESSED DURING: 4 anthesis, C globular stage; CONTAINS InterPro DOMAIN/s: Phospholipase/carboxylesterase (InterPro:IPR003140); BEST Arabidopsis thaliana protein match is: alpha/beta-Hydrolases superfamily pro…	0	1	0.925999	0.136046
2894	Chr5	TAIR10	15166001	15167000	0	0.741058	0.455102	-1.68895	0.206315	0.0753996	1.06143	0.963007	-1.54835	6.00282	5.77688	4.99208	5.8636	0.00727564	0.127813	2.06487e-05	0.371263	0.177544	0.357652	0.04346	0.461434	0	0	0	0	0	0	0	0	0	AT5G38020	0	Chr5	15165652	15167729	-	NaN	protein_coding	S-adenosyl-L-methionine-dependent methyltransferases superfamily protein	encodes a protein whose sequence is similar to SAM:salicylic acid carboxyl methyltransferase (SAMT) (GI:6002712)(Clarkia breweri) and to SAM:benzoic acid carboxyl methyltransferase (BAMT)(GI:9789277)(Antirrhinum majus)	S-adenosyl-L-methionine-dependent methyltransferases superfamily protein; CONTAINS InterPro DOMAIN/s: SAM dependent carboxyl methyltransferase (InterPro:IPR005299); BEST Arabidopsis thaliana protein match is: S-adenosyl-L-methionine-dependent methyltransferases superfamily protein (TAIR:AT3G21950.1); Has 1807 Blast hits to 1807 proteins in 277 species: Archae - 0; Bacteria - 0; Metazoa - 736; Fun…	-0.0312509	0.980594	0.109122	0.830172
448	Chr1	TAIR10	17497001	17498000	0	0.533148	0.188512	-1.15793	-0.0390386	-0.520143	0.369198	0.686883	-1.66659	6.31235	5.95839	5.65459	6.16429	0.0331583	0.383444	0.000275775	0.493479	0.181292	0.568012	0.180215	0.863461	0	2	0	0	0	0	0	0	0	AT1G47603	0	Chr1	17496839	17498110	-	NaN	protein_coding	purine permease 19	Member of a family of proteins related to PUP1, a purine transporter. May be involved in the transport of purine and purine derivatives such as cytokinins, across the plasma membrane.	purine permease 19 (PUP19); CONTAINS InterPro DOMAIN/s: Protein of unknown function DUF250 (InterPro:IPR004853); BEST Arabidopsis thaliana protein match is: purine permease 17 (TAIR:AT1G57943.1); Has 35333 Blast hits to 34131 proteins in 2444 species: Archae - 798; Bacteria - 22429; Metazoa - 974; Fungi - 991; Plants - 531; Viruses - 0; Other Eukaryotes - 9610 (source: NCBI BLink).	-0.584963	0.310505	-0.584963	0.310505
2013	Chr3	TAIR10	22219001	22220000	0	0.167378	0.0238579	-1.49701	-0.790139	-0.346534	0.242558	0.0246659	-2.8133	5.86639	5.67578	5.23249	5.51938	0.410878	0.498256	4.28751e-05	0.016036	0.182503	0.0159908	0.305525	0.390954	0	1	0	0	0	0	0	0	0	AT3G60140	0	Chr3	22216672	22220824	+	NaN	protein_coding	Glycosyl hydrolase superfamily protein	Encodes a protein similar to beta-glucosidase and is a member of glycoside hydrolase family 1. Expression is induced after 24 hours of dark treatment, in senescing leaves and treatment with exogenous photosynthesis inhibitor. Induction of gene expression was suppressed in excised leaves supplied with sugar. The authors suggest that the gene's expression pattern is responding to the level of sugar…	DARK INDUCIBLE 2 (DIN2); FUNCTIONS IN: cation binding, hydrolase activity, hydrolyzing O-glycosyl compounds, catalytic activity; INVOLVED IN: aging, response to light stimulus, response to sucrose stimulus; LOCATED IN: endomembrane system; EXPRESSED IN: 10 plant structures; EXPRESSED DURING: LP.04 four leaves visible, 4 anthesis, 4 leaf senescence stage; CONTAINS InterPro DOMAIN/s: Glycoside hydr…	-0.137504	1	-0.137504	1
2956	Chr5	TAIR10	17033001	17034000	0	0.755849	0.62955	-1.55114	-0.0397044	0.176599	0.522122	0.387971	-1.98215	6.24017	6.03919	5.28481	5.97604	0.00279262	0.0218438	1.48239e-05	0.494076	0.182604	0.236953	0.122053	1.55732	0	1	0	0	0	0	0	0	0	AT5G42590	0	Chr5	17031111	17033726	-	NaN	protein_coding	cytochrome P450, family 71, subfamily A, polypeptide 16	putative cytochrome P450	cytochrome P450, family 71, subfamily A, polypeptide 16 (CYP71A16); FUNCTIONS IN: electron carrier activity, monooxygenase activity, iron ion binding, oxygen binding, heme binding; INVOLVED IN: oxidation reduction; LOCATED IN: chloroplast; EXPRESSED IN: root, cultured cell; CONTAINS InterPro DOMAIN/s: Cytochrome P450 (InterPro:IPR001128), Cytochrome P450, conserved site (InterPro:IPR017972), Cyto…	0	1	0.263034	0.831812
812	Chr1	TAIR10	26335001	26336000	0	0.410691	0.244209	-1.87657	-0.0443832	-0.484639	0.281884	0.94419	-1.54028	5.14701	5.14564	4.22172	5.03113	0.243903	0.388011	0.000334086	0.496147	0.185447	0.588022	0.0984796	0.835365	0	0	0	0	0	0	0	0	0	AT1G69920	0	Chr1	26334250	26335558	-	0	protein_coding	glutathione S-transferase TAU 12	Encodes glutathione transferase belonging to the tau class of GSTs. Naming convention according to Wagner et al. (2002).	glutathione S-transferase TAU 12 (GSTU12); CONTAINS InterPro DOMAIN/s: Thioredoxin fold (InterPro:IPR012335), Glutathione S-transferase, C-terminal-like (InterPro:IPR010987), Glutathione S-transferase/chloride channel, C-terminal (InterPro:IPR017933), Thioredoxin-like fold (InterPro:IPR012336), Glutathione S-transferase, N-terminal (InterPro:IPR004045); BEST Arabidopsis thaliana protein match is:…	0.469485	0.47313	1.20645	0.0137182
2923	Chr5	TAIR10	15971001	15972000	0	-0.386444	-0.760216	-1.80871	-0.327947	-0.870468	-0.265521	-0.387385	-1.44113	5.16623	4.93463	4.57065	5.21819	0.425636	0.0976141	8.77543e-05	0.309121	0.186044	0.325446	0.113177	0.453456	0	0	0	0	0	0	0	0	0	AT5G39880	0	Chr5	15970887	15972237	+	NaN	protein_coding	---	---	unknown protein; FUNCTIONS IN: molecular_function unknown; INVOLVED IN: biological_process unknown; LOCATED IN: endomembrane system; EXPRESSED IN: 10 plant structures; EXPRESSED DURING: L mature pollen stage, M germinated pollen stage, 4 anthesis, C globular stage, petal differentiation and expansion stage; BEST Arabidopsis thaliana protein match is: unknown protein (TAIR:AT3G28750.1); Has 25 Bla…	0	1	0	1
620	Chr1	TAIR10	22530001	22531000	0	0.237526	0.214773	-1.25738	-0.677278	-0.356796	0.162432	-0.162134	-2.84031	6.04946	5.88391	5.49346	5.72735	0.319187	0.360478	0.000183015	0.0269918	0.18682	6.89816	0.386488	0.310522	0	1	0	0	0	0	0	0	0	AT1G61130	0	Chr1	22529024	22531784	-	NaN	protein_coding	serine carboxypeptidase-like 32	---	serine carboxypeptidase-like 32 (SCPL32); FUNCTIONS IN: serine-type carboxypeptidase activity; INVOLVED IN: proteolysis; LOCATED IN: endomembrane system; EXPRESSED IN: male gametophyte, root, flower; EXPRESSED DURING: 4 anthesis; CONTAINS InterPro DOMAIN/s: Peptidase S10, serine carboxypeptidase (InterPro:IPR001563), Peptidase S10, serine carboxypeptidase, active site (InterPro:IPR018202); BEST A…	0.263034	0.831812	0.263034	0.831812
1731	Chr3	TAIR10	9177001	9178000	0	-0.258905	-1.07148	-1.06184	-0.871799	-0.848119	-0.176755	0.192091	-0.534113	5.99119	5.40191	5.71078	5.75829	0.43991	0.00562728	0.000708519	0.00357062	0.189436	1.44015	0.33108	0.0137844	0	0	0	0	0	0	0	0	1	AT3G25200	0	Chr3	9176932	9178268	+	NaN	protein_coding	---	---	unknown protein; BEST Arabidopsis thaliana protein match is: Protein of unknown function (DUF295) (TAIR:AT5G54320.1); Has 64 Blast hits to 64 proteins in 2 species: Archae - 0; Bacteria - 0; Metazoa - 0; Fungi - 0; Plants - 64; Viruses - 0; Other Eukaryotes - 0 (source: NCBI BLink).	0	1	0	1
2934	Chr5	TAIR10	16142001	16143000	0	0.267859	-0.470627	-1.55635	-0.674885	-0.0970976	0.395772	0.0662426	-2.70221	6.04298	5.55363	5.3284	5.70637	0.283265	0.191161	1.0015e-05	0.0287303	0.192169	1.33422	0.2692	0.75039	0	2	0	0	0	0	0	0	0	NaN	NaN	NaN	NaN	NaN	NaN	NaN	NaN	NaN	NaN	NaN	NaN	NaN	NaN	NaN
400	Chr1	TAIR10	12958001	12959000	0	0.758243	0.337007	-2.27718	0.38421	0.455812	1.12567	1.73121	-1.07127	4.97515	4.92889	3.68872	4.89153	0.056962	0.329992	0.000288858	0.295395	0.194828	0.673457	0.360354	0.0850357	0	0	0	0	0	0	0	0	0	NaN	NaN	NaN	NaN	NaN	NaN	NaN	NaN	NaN	NaN	NaN	NaN	NaN	NaN	NaN
1686	Chr3	TAIR10	7755001	7756000	0	0.411939	-0.0472373	-2.08504	0.340428	0.141669	0.611945	0.867166	-2.29738	5.6102	5.35498	4.57705	5.69715	0.184745	0.495798	4.78177e-06	0.242842	0.194959	1.11251	0.0484752	0.410576	0	0	0	0	0	0	0	0	0	AT3G22010	0	Chr3	7754311	7755762	+	NaN	protein_coding	Receptor-like protein kinase-related family protein	---	Receptor-like protein kinase-related family protein; FUNCTIONS IN: molecular_function unknown; INVOLVED IN: biological_process unknown; LOCATED IN: endomembrane system; CONTAINS InterPro DOMAIN/s: Protein of unknown function DUF26 (InterPro:IPR002902); BEST Arabidopsis thaliana protein match is: Domain of unknown function (DUF26) (TAIR:AT4G20680.1); Has 1318 Blast hits to 1299 proteins in 20 spec…	0	1	0	1
3236	Chr5	TAIR10	25080001	25081000	0	0.282151	-0.485182	-2.24189	-1.37663	-1.13601	0.189647	-0.161571	-3.72552	5.7982	5.35544	4.7507	5.09756	0.293687	0.20518	1.40464e-07	0.000205068	0.19524	0.501915	0.248705	0.0958407	0	1	0	0	1	0	0	0	0	AT5G62470	0	Chr5	25078991	25081101	-	NaN	protein_coding	myb domain protein 96	Encodes a R2R3 type Myb transcription factor whose expression is strongly induced by abscisic acid. Mediates abscisic acid signaling during drought stress response.	myb domain protein 96 (MYB96); CONTAINS InterPro DOMAIN/s: SANT, DNA-binding (InterPro:IPR001005), Homeodomain-like (InterPro:IPR009057), Myb, DNA-binding (InterPro:IPR014778), HTH transcriptional regulator, Myb-type, DNA-binding (InterPro:IPR017930), Homeodomain-related (InterPro:IPR012287), Myb transcription factor (InterPro:IPR015495); BEST Arabidopsis thaliana protein match is: myb domain pro…	0.0449601	0.899438	-0.131772	0.566489
2885	Chr5	TAIR10	15117001	15118000	0	0.345609	0.172467	-1.21988	-0.0248526	-0.0800572	0.514135	0.60567	-1.9192	6.37967	6.07302	5.78346	6.33632	0.151407	0.393106	5.55121e-05	0.497012	0.195564	0.55529	0.22292	0.536437	1	2	0	0	0	0	0	0	0	AT5G37950	0	Chr5	15115883	15117617	+	0	protein_coding	UDP-Glycosyltransferase superfamily protein	---	UDP-Glycosyltransferase superfamily protein; FUNCTIONS IN: transferase activity, transferring hexosyl groups; INVOLVED IN: metabolic process; CONTAINS InterPro DOMAIN/s: UDP-glucuronosyl/UDP-glucosyltransferase (InterPro:IPR002213); BEST Arabidopsis thaliana protein match is: UDP-Glycosyltransferase superfamily protein (TAIR:AT5G38010.1); Has 1807 Blast hits to 1807 proteins in 277 species: Archa…	0.616671	0.255875	0.552541	0.324009
2244	Chr4	TAIR10	9085001	9086000	0	0.357638	0.140864	-1.43159	0.0512196	-0.214732	0.533646	0.886501	-1.55654	5.65187	5.49853	4.95898	5.62301	0.230944	0.448927	0.000419313	0.492295	0.197035	0.724366	0.0418442	1.64663	0	1	0	0	0	0	0	0	0	NaN	NaN	NaN	NaN	NaN	NaN	NaN	NaN	NaN	NaN	NaN	NaN	NaN	NaN	NaN
1016	Chr2	TAIR10	6898001	6899000	0	0.431645	0.587471	-1.34583	-0.662346	-0.53717	0.644784	0.491848	-2.37615	6.1865	6.1007	5.4903	5.77574	0.0979716	0.0290699	5.88948e-05	0.0278713	0.197639	0.0884319	0.276968	0.10453	0	1	0	0	0	0	0	0	0	NaN	NaN	NaN	NaN	NaN	NaN	NaN	NaN	NaN	NaN	NaN	NaN	NaN	NaN	NaN
3053	Chr5	TAIR10	19680001	19681000	0	0.32191	-0.0714384	-1.35555	-1.14647	-0.966536	0.48435	0.317358	-1.96587	5.97813	5.65877	5.33446	5.37652	0.228147	0.488226	0.000132196	0.000707421	0.200976	1.56824	0.183864	0.0852343	0	1	0	0	0	0	0	0	1	AT5G48550	0	Chr5	19678917	19680560	+	0	protein_coding	F-box associated ubiquitination effector family protein	---	F-box associated ubiquitination effector family protein; CONTAINS InterPro DOMAIN/s: F-box associated interaction domain (InterPro:IPR017451); Has 1807 Blast hits to 1807 proteins in 277 species: Archae - 0; Bacteria - 0; Metazoa - 736; Fungi - 347; Plants - 385; Viruses - 0; Other Eukaryotes - 339 (source: NCBI BLink).	0.222392	0.845019	-0.263034	0.831812
3228	Chr5	TAIR10	24854001	24855000	0	-0.705537	-0.184867	-0.374451	-2.75066	0.663912	-0.468659	-0.768594	-2.55973	4.23883	4.54164	4.42542	3.13896	0.377054	0.464538	0.357819	0.00015425	0.202081	0.613506	0.745274	1.63788	0	0	0	0	0	0	0	0	0	AT5G61890	-92	Chr5	24852639	24853910	-	NaN	protein_coding	Integrase-type DNA-binding superfamily protein	encodes a member of the ERF (ethylene response factor) subfamily B-4 of ERF/AP2 transcription factor family. The protein contains one AP2 domain. There are 7 members in this subfamily.	Integrase-type DNA-binding superfamily protein; CONTAINS InterPro DOMAIN/s: DNA-binding, integrase-type (InterPro:IPR016177), Pathogenesis-related transcriptional factor/ERF, DNA-binding (InterPro:IPR001471); BEST Arabidopsis thaliana protein match is: Integrase-type DNA-binding superfamily protein (TAIR:AT5G07310.1); Has 1807 Blast hits to 1807 proteins in 277 species: Archae - 0; Bacteria - 0; …	0.970854	0.395321	0.214125	0.733512
3161	Chr5	TAIR10	22845001	22846000	0	0.328442	0.861288	-2.18084	-0.351664	-0.484188	0.496836	0.482898	-2.72269	5.5438	5.78758	4.50671	5.32586	0.273188	0.00364118	2.92513e-06	0.275564	0.203552	0.281083	0.110547	0.15893	0	0	0	0	0	0	0	0	0	NaN	NaN	NaN	NaN	NaN	NaN	NaN	NaN	NaN	NaN	NaN	NaN	NaN	NaN	NaN
510	Chr1	TAIR10	19294001	19295000	0	0.366982	0.367629	-1.79976	-0.495488	-0.595641	0.555342	1.27743	-1.41504	5.13395	5.21404	4.26732	4.81459	0.283326	0.273706	0.000484814	0.218058	0.203781	0.552378	0.119747	0.0919572	0	2	0	0	0	0	0	0	0	AT1G51930	0	Chr1	19294838	19295236	-	NaN	protein_coding	RING/U-box superfamily protein	---	RING/U-box superfamily protein; FUNCTIONS IN: zinc ion binding; LOCATED IN: endomembrane system; CONTAINS InterPro DOMAIN/s: Zinc finger, RING-type (InterPro:IPR001841), Zinc finger, C3HC4 RING-type (InterPro:IPR018957); BEST Arabidopsis thaliana protein match is: RING/U-box superfamily protein (TAIR:AT5G41450.1); Has 8601 Blast hits to 8582 proteins in 272 species: Archae - 0; Bacteria - 0; Meta…	0	1	0	1
2821	Chr5	TAIR10	9018001	9019000	0	0.426537	-0.275893	-1.4078	-0.458756	-0.862048	0.645635	0.514307	-2.54271	5.71319	5.32755	4.99689	5.39554	0.158883	0.376949	0.000441433	0.172521	0.203968	3.28683	0.287427	0.305801	1	2	0	0	0	0	0	0	0	AT5G25860	0	Chr5	9016908	9018424	-	NaN	protein_coding	F-box/RNI-like superfamily protein	---	F-box/RNI-like superfamily protein; FUNCTIONS IN: molecular_function unknown; INVOLVED IN: biological_process unknown; LOCATED IN: vacuole; CONTAINS InterPro DOMAIN/s: F-box domain, cyclin-like (InterPro:IPR001810), F-box domain, Skp2-like (InterPro:IPR022364), FBD-like (InterPro:IPR006566); BEST Arabidopsis thaliana protein match is: F-box family protein (TAIR:AT3G60040.1); Has 1807 Blast hits t…	0	1	0.137504	1
1395	Chr2	TAIR10	18370001	18371000	0	-0.23401	0.144341	-1.18543	-1.80258	-0.87913	-0.154382	-1.53473	-4.10148	5.23046	5.36011	4.89603	4.50763	0.470066	0.451161	0.00479014	6.85139e-05	0.20608	1.20937	0.55177	0.344607	0	0	0	0	0	0	0	0	0	NaN	NaN	NaN	NaN	NaN	NaN	NaN	NaN	NaN	NaN	NaN	NaN	NaN	NaN	NaN
439	Chr1	TAIR10	17370001	17371000	0	0.319966	0.475728	-2.15591	-0.272594	-0.375393	0.48991	-0.329807	-4.0852	5.20477	5.33991	4.18899	5.02261	0.317695	0.16627	3.9498e-05	0.374086	0.209322	5.44572	0.309226	0.159134	0	0	0	0	0	0	0	0	0	NaN	NaN	NaN	NaN	NaN	NaN	NaN	NaN	NaN	NaN	NaN	NaN	NaN	NaN	NaN
981	Chr2	TAIR10	1695001	1696000	0	0.293125	0.457429	-1.57477	-1.22017	-0.812584	0.449036	0.409518	-2.88597	6.05289	5.98668	5.31686	5.43094	0.252002	0.101583	8.45e-06	0.00022242	0.209512	0.055137	0.294074	0.200706	1	2	0	0	0	0	0	0	1	AT2G04830	0	Chr2	1695355	1695856	+	NaN	protein_coding	Protein of unknown function (DUF295)	---	Protein of unknown function (DUF295); CONTAINS InterPro DOMAIN/s: Protein of unknown function DUF295 (InterPro:IPR005174); BEST Arabidopsis thaliana protein match is: Protein of unknown function (DUF295) (TAIR:AT2G04840.1); Has 68 Blast hits to 68 proteins in 3 species: Archae - 0; Bacteria - 0; Metazoa - 0; Fungi - 0; Plants - 68; Viruses - 0; Other Eukaryotes - 0 (source: NCBI BLink).	0	1	0	1
1771	Chr3	TAIR10	10539001	10540000	0	0.537861	0.448437	-1.87091	-0.459025	-0.702137	0.823681	0.59865	-1.89214	6.36738	6.12846	5.36369	6.00823	0.0283815	0.0922742	5.42513e-08	0.0980615	0.209616	0.143185	0.00564549	0.209731	0	1	0	0	0	0	0	0	0	AT3G28270	0	Chr3	10538105	10540024	+	0	protein_coding	Protein of unknown function (DUF677)	---	Protein of unknown function (DUF677); CONTAINS InterPro DOMAIN/s: Protein of unknown function DUF677 (InterPro:IPR007749); BEST Arabidopsis thaliana protein match is: Protein of unknown function (DUF677) (TAIR:AT3G28290.1); Has 636 Blast hits to 621 proteins in 191 species: Archae - 37; Bacteria - 189; Metazoa - 134; Fungi - 25; Plants - 165; Viruses - 1; Other Eukaryotes - 85 (source: NCBI BLink…	-1.24202	0.00126795	0.933762	1.18248e-05
2160	Chr4	TAIR10	7144001	7145000	0	0.599931	1.33133	-1.12655	-1.39291	0.762422	0.391493	-1.15488	-4.57258	4.4845	5.11276	3.83666	3.58165	0.189964	0.000314665	0.066718	0.0306452	0.209818	13.9327	0.604872	3.42938	1	1	0	0	1	0	0	0	0	AT4G11880	0	Chr4	7143115	7147391	+	NaN	protein_coding	AGAMOUS-like 14	AGL12, AGL14, and AGL17 are all preferentially expressed in root tissues and therefore represent the only characterized MADS box genes expressed in roots.	AGAMOUS-like 14 (AGL14); FUNCTIONS IN: DNA binding, sequence-specific DNA binding transcription factor activity; INVOLVED IN: regulation of transcription, DNA-dependent; LOCATED IN: nucleus; EXPRESSED IN: root; CONTAINS InterPro DOMAIN/s: Transcription factor, MADS-box (InterPro:IPR002100), Transcription factor, K-box (InterPro:IPR002487); BEST Arabidopsis thaliana protein match is: AGAMOUS-like …	0.125531	1	0.447459	0.557197
2882	Chr5	TAIR10	15036001	15037000	0	0.67468	0.68175	-1.91347	-0.275125	-0.35609	1.03406	1.07512	-2.76006	5.82051	5.77668	4.73728	5.4702	0.0227519	0.0234288	9.52832e-06	0.334144	0.210073	0.223647	0.181223	0.128677	1	0	0	0	0	0	0	0	0	AT5G37800	0	Chr5	15036197	15037574	+	NaN	protein_coding	RHD SIX-LIKE 1	---	RHD SIX-LIKE 1 (RSL1); FUNCTIONS IN: DNA binding, sequence-specific DNA binding transcription factor activity; INVOLVED IN: regulation of transcription; LOCATED IN: nucleus; CONTAINS InterPro DOMAIN/s: Helix-loop-helix DNA-binding domain (InterPro:IPR001092), Helix-loop-helix DNA-binding (InterPro:IPR011598); BEST Arabidopsis thaliana protein match is: ROOT HAIR DEFECTIVE6 (TAIR:AT1G66470.1); Has…	-0.378512	0.67764	0	1
1765	Chr3	TAIR10	10378001	10379000	0	1.25697	0.99353	-2.34863	-0.0596543	-0.807055	1.93623	2.16214	-1.55773	4.9256	5.02958	3.35999	4.36355	0.00155928	0.0103941	0.000901081	0.49562	0.212588	0.370086	0.202568	0.864337	0	0	0	0	0	0	0	0	0	AT3G27950	0	Chr3	10378048	10379896	+	NaN	protein_coding	GDSL-like Lipase/Acylhydrolase superfamily protein	---	GDSL-like Lipase/Acylhydrolase superfamily protein; FUNCTIONS IN: hydrolase activity, acting on ester bonds, carboxylesterase activity; INVOLVED IN: lipid metabolic process; LOCATED IN: endomembrane system; EXPRESSED IN: root; CONTAINS InterPro DOMAIN/s: Lipase, GDSL (InterPro:IPR001087); BEST Arabidopsis thaliana protein match is: GDSL-like Lipase/Acylhydrolase superfamily protein (TAIR:AT5G1445…	-0.137504	1	-0.137504	1
3182	Chr5	TAIR10	23361001	23362000	0	0.705392	0.735024	-2.59989	-0.228649	-0.369384	1.08759	1.56131	-2.32842	5.41832	5.48542	3.99605	5.06591	0.03881	0.0273107	2.8949e-06	0.405154	0.212927	0.359515	0.0551061	0.236119	0	1	0	0	0	0	0	0	0	AT5G57670	0	Chr5	23360400	23363757	-	NaN	NaN	NaN	NaN	NaN	0.049753	0.986343	0.452512	0.564951
1970	Chr3	TAIR10	20665001	20666000	0	0.291607	0.600904	-1.17766	-0.349877	-0.331183	0.449933	-0.0621696	-2.53097	6.2393	6.20092	5.6921	6.05773	0.231133	0.0205731	0.000173661	0.187759	0.212937	1.22625	0.365104	0.0275294	0	1	0	0	0	0	0	0	0	AT3G55680	0	Chr3	20665685	20666315	-	NaN	protein_coding	Plant invertase/pectin methylesterase inhibitor superfamily protein	---	Plant invertase/pectin methylesterase inhibitor superfamily protein; FUNCTIONS IN: enzyme inhibitor activity, pectinesterase inhibitor activity, pectinesterase activity; INVOLVED IN: biological_process unknown; LOCATED IN: endomembrane system; EXPRESSED IN: pedicel, synergid; EXPRESSED DURING: 4 anthesis; CONTAINS InterPro DOMAIN/s: Pectinesterase inhibitor (InterPro:IPR006501); BEST Arabidopsis …	0	1	0	1
1072	Chr2	TAIR10	8259001	8260000	0	0.266735	0.556936	-1.58498	-0.64954	-0.604149	0.412296	0.563935	-1.64367	5.76253	5.82542	5.03899	5.43247	0.314407	0.0604562	5.14778e-05	0.0560401	0.213737	0.00623342	0.0181919	0.0362641	1	0	0	0	0	0	0	0	0	AT2G19060	0	Chr2	8257000	8260545	+	NaN	protein_coding	SGNH hydrolase-type esterase superfamily protein	---	SGNH hydrolase-type esterase superfamily protein; FUNCTIONS IN: lipase activity, hydrolase activity, acting on ester bonds; INVOLVED IN: lipid metabolic process; LOCATED IN: endomembrane system; EXPRESSED IN: root; CONTAINS InterPro DOMAIN/s: Lipase, GDSL (InterPro:IPR001087), Esterase, SGNH hydrolase-type (InterPro:IPR013830); BEST Arabidopsis thaliana protein match is: GDSL-like Lipase/Acylhydr…	0	1	0	1
2892	Chr5	TAIR10	15158001	15159000	0	0.576086	0.272893	-1.82942	-0.121323	0.0244992	0.891339	1.30059	-2.337	5.81449	5.6052	4.82031	5.59141	0.0530474	0.323497	1.35062e-05	0.459144	0.214542	0.652306	0.121885	1.53782	0	3	0	0	0	0	0	0	0	AT5G38010	0	Chr5	15158275	15160212	+	0	protein_coding	UDP-Glycosyltransferase superfamily protein	---	UDP-Glycosyltransferase superfamily protein; FUNCTIONS IN: UDP-glycosyltransferase activity, transferase activity, transferring glycosyl groups; INVOLVED IN: metabolic process; LOCATED IN: cellular_component unknown; CONTAINS InterPro DOMAIN/s: UDP-glucuronosyl/UDP-glucosyltransferase (InterPro:IPR002213); BEST Arabidopsis thaliana protein match is: UDP-Glycosyltransferase superfamily protein (TA…	-0.331621	0.767443	1.36257	0.00160084
1057	Chr2	TAIR10	8013001	8014000	0	-0.0641557	-0.601918	-2.03035	-1.20822	-0.534671	-0.0992493	-1.00759	-4.60714	5.82943	5.44763	5.03789	5.37461	0.496498	0.115958	1.41293e-07	0.000345485	0.217426	0.252361	0.388335	0.386898	0	1	0	0	0	0	0	0	0	NaN	NaN	NaN	NaN	NaN	NaN	NaN	NaN	NaN	NaN	NaN	NaN	NaN	NaN	NaN
515	Chr1	TAIR10	19374001	19375000	0	0.552631	0.685243	-3.75787	-0.0663417	-0.376291	0.860618	0.753345	-2.34533	5.12779	5.29749	3.22843	4.92781	0.138659	0.054402	1.4004e-07	0.492019	0.217621	0.0472738	0.231518	0.703419	0	1	0	0	0	0	0	0	0	NaN	NaN	NaN	NaN	NaN	NaN	NaN	NaN	NaN	NaN	NaN	NaN	NaN	NaN	NaN
2134	Chr4	TAIR10	6202001	6203000	0	-0.110682	-0.484154	-2.31004	-1.35087	-0.4727	-0.0714281	0.136018	-2.70978	5.1112	4.96133	4.20755	4.57981	0.493683	0.254596	8.37983e-06	0.00263668	0.217946	1.7917	0.0796657	0.482093	0	1	0	0	0	0	0	0	0	NaN	NaN	NaN	NaN	NaN	NaN	NaN	NaN	NaN	NaN	NaN	NaN	NaN	NaN	NaN
193	Chr1	TAIR10	6509001	6510000	0	0.206517	-0.452662	-1.40391	-1.331	-0.842349	0.323613	0.00830015	-2.69714	5.50399	5.1745	4.90107	4.85785	0.396287	0.252315	0.000719314	0.00104144	0.220052	1.04205	0.315495	0.225044	0	1	0	0	0	0	0	0	0	AT1G18860	0	Chr1	6509492	6511227	+	NaN	protein_coding	WRKY DNA-binding protein 61	member of WRKY Transcription Factor; Group II-b	WRKY DNA-binding protein 61 (WRKY61); CONTAINS InterPro DOMAIN/s: DNA-binding WRKY (InterPro:IPR003657); BEST Arabidopsis thaliana protein match is: WRKY DNA-binding protein 72 (TAIR:AT5G15130.1); Has 5252 Blast hits to 3559 proteins in 289 species: Archae - 0; Bacteria - 31; Metazoa - 146; Fungi - 97; Plants - 3463; Viruses - 1; Other Eukaryotes - 1514 (source: NCBI BLink).	-0.137504	1	0.447459	0.557197
1718	Chr3	TAIR10	8712001	8713000	0	0.25934	0.31815	-1.97343	-0.641149	-0.184047	0.406913	0.638028	-2.02092	5.78061	5.72261	4.87368	5.45897	0.320705	0.263121	1.51105e-06	0.0569813	0.220835	0.33384	0.0118973	0.555277	0	1	0	0	0	0	0	0	0	AT3G24130	0	Chr3	8711663	8713424	-	NaN	protein_coding	Pectin lyase-like superfamily protein	---	Pectin lyase-like superfamily protein; FUNCTIONS IN: pectinesterase activity; INVOLVED IN: cell wall modification; LOCATED IN: endomembrane system, cell wall, plant-type cell wall; EXPRESSED IN: flower; CONTAINS InterPro DOMAIN/s: Pectinesterase, active site (InterPro:IPR018040), Pectin lyase fold/virulence factor (InterPro:IPR011050), Pectinesterase, catalytic (InterPro:IPR000070), Pectin lyase …	0	1	0	1
2235	Chr4	TAIR10	8787001	8788000	0	0.235437	0.4607	-1.62701	0.300491	0.0385509	0.370497	0.135579	-2.0054	6.16603	6.09642	5.43158	6.33665	0.309986	0.0873786	1.52278e-06	0.208108	0.222162	0.543428	0.104228	0.768058	0	0	0	0	0	0	0	0	0	AT4G15380	-739	Chr4	8788739	8790444	+	0	protein_coding	cytochrome P450, family 705, subfamily A, polypeptide 4	member of CYP705A	cytochrome P450, family 705, subfamily A, polypeptide 4 (CYP705A4); FUNCTIONS IN: electron carrier activity, monooxygenase activity, iron ion binding, oxygen binding, heme binding; INVOLVED IN: oxidation reduction; LOCATED IN: endomembrane system; EXPRESSED IN: 11 plant structures; EXPRESSED DURING: LP.04 four leaves visible, 4 anthesis, LP.10 ten leaves visible, F mature embryo stage, petal diff…	0.514573	0.391528	0.652077	0.242985
1244	Chr2	TAIR10	13516001	13517000	0	0.204732	0.195149	-0.671323	-1.2334	-1.1202	0.129166	0.117036	-1.38979	6.69039	6.37455	6.42257	6.12231	0.297272	0.34209	0.00682997	1.47339e-06	0.224968	0.248619	0.348921	0.0481381	0	1	0	0	0	0	0	0	0	AT2G31780	0	Chr2	13515199	13517413	+	NaN	protein_coding	RING/U-box superfamily protein	---	ARIADNE 11 (ARI11); FUNCTIONS IN: zinc ion binding; CONTAINS InterPro DOMAIN/s: Zinc finger, RING-type, conserved site (InterPro:IPR017907), Zinc finger, C6HC-type (InterPro:IPR002867), Zinc finger, RING-type (InterPro:IPR001841); BEST Arabidopsis thaliana protein match is: RING/U-box superfamily protein (TAIR:AT2G31760.1); Has 3062 Blast hits to 3040 proteins in 224 species: Archae - 0; Bacteria…	0.137504	1	0	1
2829	Chr5	TAIR10	9120001	9121000	0	0.993884	0.0330932	-2.39017	0.0463432	0.214015	1.57241	1.02409	-2.17038	5.30176	4.93589	3.84002	4.93637	0.00463516	0.497991	5.41467e-05	0.496066	0.225256	0.935623	0.0482146	0.639094	0	0	0	0	0	0	0	0	0	AT5G26114	0	Chr5	9120688	9120960	-	NaN	protein_coding	---	This gene encodes a small protein and has either evidence of transcription or purifying selection.	unknown protein; Has 30201 Blast hits to 17322 proteins in 780 species: Archae - 12; Bacteria - 1396; Metazoa - 17338; Fungi - 3422; Plants - 5037; Viruses - 0; Other Eukaryotes - 2996 (source: NCBI BLink).	0	1	0	1
1020	Chr2	TAIR10	7036001	7037000	0	0.681531	0.671791	-1.24755	-0.20069	-0.53705	1.08022	1.14475	-1.39147	6.14078	6.01292	5.36947	5.83183	0.00975563	0.015089	0.000393187	0.379578	0.226048	0.260076	0.0545761	0.457173	0	0	0	0	0	0	0	0	0	AT2G16230	0	Chr2	7035463	7038326	-	NaN	protein_coding	O-Glycosyl hydrolases family 17 protein	---	O-Glycosyl hydrolases family 17 protein; FUNCTIONS IN: cation binding, hydrolase activity, hydrolyzing O-glycosyl compounds, catalytic activity; INVOLVED IN: carbohydrate metabolic process; LOCATED IN: endomembrane system; EXPRESSED IN: root; CONTAINS InterPro DOMAIN/s: X8 (InterPro:IPR012946), Glycoside hydrolase, catalytic core (InterPro:IPR017853), Glycoside hydrolase, family 17 (InterPro:IPR0…	0	1	0	1
713	Chr1	TAIR10	24452001	24453000	0	0.398748	0.472592	-2.00672	0.602541	0.452913	0.639768	0.640929	-2.54793	6.16212	6.03722	5.16475	6.40006	0.127353	0.0858692	5.18172e-08	0.0125753	0.231636	0.150904	0.118879	0.141498	0	0	0	0	0	0	0	0	0	AT1G65740	0	Chr1	24452096	24453211	-	NaN	protein_coding	Protein of unknown function (DUF295)	---	Protein of unknown function (DUF295); CONTAINS InterPro DOMAIN/s: Protein of unknown function DUF295 (InterPro:IPR005174); BEST Arabidopsis thaliana protein match is: Protein of unknown function (DUF295) (TAIR:AT1G65760.1); Has 192 Blast hits to 188 proteins in 11 species: Archae - 0; Bacteria - 0; Metazoa - 0; Fungi - 0; Plants - 192; Viruses - 0; Other Eukaryotes - 0 (source: NCBI BLink).	0	1	0	1
438	Chr1	TAIR10	17369001	17370000	0	0.400887	0.550163	-1.80925	-0.0875028	-0.414961	0.646269	1.05368	-1.58658	5.00053	5.19083	4.11466	4.86461	0.269527	0.132513	0.000910733	0.486781	0.233885	0.313556	0.0656091	0.65431	0	1	0	0	0	0	0	0	0	AT1G47370	-299	Chr1	17365898	17368703	-	NaN	protein_coding	Toll-Interleukin-Resistance (TIR) domain family protein	---	Toll-Interleukin-Resistance (TIR) domain family protein; FUNCTIONS IN: transmembrane receptor activity; INVOLVED IN: signal transduction, defense response, innate immune response; LOCATED IN: intrinsic to membrane; CONTAINS InterPro DOMAIN/s: Toll-Interleukin receptor (InterPro:IPR000157); BEST Arabidopsis thaliana protein match is: Toll-Interleukin-Resistance (TIR) domain family protein (TAIR:AT…	0.281771	0.860341	0.866733	0.247384
2458	Chr4	TAIR10	16517001	16518000	0	0.729177	-0.0480713	-1.62063	-0.958287	-1.75832	0.451129	0.79892	-3.10817	5.93017	5.47746	4.95923	5.213	0.0101778	0.495265	5.67579e-05	0.0083538	0.235175	1.12505	0.314702	0.294713	0	1	0	0	0	0	0	0	0	AT4G34580	0	Chr4	16515327	16519534	+	NaN	protein_coding	Sec14p-like phosphatidylinositol transfer family protein	Encodes COW1 (can of worms1), a phosphatidylinositol transfer protein essential for root hair tip growth. The N-terminus of the COW1 protein is 32% identical to an essential phosphatidylinositol transfer protein (PITP), the yeast Sec14 protein (sec14p) while the C-terminus is 34.5% identical to a late nodulin of Lotus japonicus, Nlj16. Expression of COW1 complements the growth defect associated w…	CAN OF WORMS1 (COW1); FUNCTIONS IN: transporter activity, phosphatidylinositol transporter activity; INVOLVED IN: root epidermal cell differentiation, transport, root hair cell tip growth, cell tip growth; LOCATED IN: intracellular; EXPRESSED IN: 9 plant structures; CONTAINS InterPro DOMAIN/s: Cellular retinaldehyde-binding/triple function, C-terminal (InterPro:IPR001251), Cellular retinaldehyde-…	-2.24393	0.148475	0.811928	0.116651
2973	Chr5	TAIR10	17344001	17345000	0	-1.34072	-0.239612	-1.35679	-1.42502	-1.37943	-0.8299	-0.591988	-4.09346	4.97957	5.20248	4.83905	4.72281	0.0910639	0.411257	0.00143352	0.000793526	0.235552	0.424754	0.502304	0.0162669	0	1	0	0	0	0	0	0	0	NaN	NaN	NaN	NaN	NaN	NaN	NaN	NaN	NaN	NaN	NaN	NaN	NaN	NaN	NaN
2469	Chr4	TAIR10	16831001	16832000	0	-0.187307	0.302216	-1.37792	-0.417174	-0.215834	-0.115822	0.294872	-1.6228	5.66208	5.75877	5.21707	5.6303	0.474026	0.276056	0.0001954	0.177538	0.23739	0.0122589	0.0816643	0.319076	0	1	0	0	0	0	0	0	0	NaN	NaN	NaN	NaN	NaN	NaN	NaN	NaN	NaN	NaN	NaN	NaN	NaN	NaN	NaN
1155	Chr2	TAIR10	10792001	10793000	0	-0.816211	-0.0315994	-1.17324	-0.281198	-0.557909	-0.500873	0.547091	-1.08691	5.93362	5.92024	5.73774	6.1373	0.14721	0.497213	0.000142986	0.256228	0.239785	1.11826	0.0382323	0.330557	0	0	0	0	0	0	0	0	0	AT2G25340	0	Chr2	10792664	10793832	-	NaN	protein_coding	vesicle-associated membrane protein 712	Member of Synaptobrevin-like AtVAMP7C, v-SNARE protein family.	vesicle-associated membrane protein 712 (VAMP712); INVOLVED IN: transport, vesicle-mediated transport; LOCATED IN: vacuolar membrane, membrane; EXPRESSED IN: 10 plant structures; EXPRESSED DURING: LP.04 four leaves visible, 4 anthesis, petal differentiation and expansion stage, LP.08 eight leaves visible; CONTAINS InterPro DOMAIN/s: Longin (InterPro:IPR010908), Longin-like (InterPro:IPR011012), S…	0.263034	0.831812	0	1
2791	Chr5	TAIR10	8199001	8200000	0	0.364097	0.389165	-2.39214	-0.0576951	-0.413497	0.596222	0.466514	-2.59913	6.40992	6.19735	5.24056	6.3414	0.129109	0.131592	1.63271e-11	0.48405	0.241215	0.0901841	0.0414874	0.758329	0	1	0	0	0	0	0	0	0	AT5G24190	0	Chr5	8199757	8201051	+	0	protein_coding	Lipase class 3-related protein	---	Lipase class 3-related protein; FUNCTIONS IN: triglyceride lipase activity; INVOLVED IN: lipid metabolic process; LOCATED IN: cellular_component unknown; CONTAINS InterPro DOMAIN/s: Lipase, class 3 (InterPro:IPR002921); BEST Arabidopsis thaliana protein match is: Lipase class 3-related protein (TAIR:AT5G24180.1); Has 1807 Blast hits to 1807 proteins in 277 species: Archae - 0; Bacteria - 0; Metaz…	-0.263034	0.831812	1.54432	0.00108854
108	Chr1	TAIR10	4127001	4128000	0	-2.24398	-0.6948	-1.37962	-0.565744	-1.50339	-1.36949	0.509563	-1.42342	5.07441	5.24697	5.14387	5.48077	0.00305975	0.0918574	0.000282806	0.0898217	0.242142	6.57271	0.015634	0.453597	0	0	0	0	0	0	0	0	0	AT1G12160	0	Chr1	4126066	4128310	+	1	protein_coding	Flavin-binding monooxygenase family protein	---	Flavin-binding monooxygenase family protein; FUNCTIONS IN: NADP or NADPH binding, monooxygenase activity, FAD binding, flavin-containing monooxygenase activity; INVOLVED IN: oxidation reduction; LOCATED IN: cellular_component unknown; EXPRESSED IN: 15 plant structures; EXPRESSED DURING: 6 growth stages; CONTAINS InterPro DOMAIN/s: Flavin-containing monooxygenase FMO (InterPro:IPR000960), Flavin-c…	2.92376	0.0474386	1.37197	0.0195923
2768	Chr5	TAIR10	7689001	7690000	0	0.527557	-0.213865	-2.09371	-0.303938	-0.40356	0.865762	1.04131	-2.9712	5.45394	5.11892	4.36206	5.15579	0.115501	0.431692	2.1791e-05	0.336652	0.242386	1.51327	0.173318	0.141207	0	0	0	0	0	0	0	0	0	AT5G22980	0	Chr5	7688084	7690648	+	NaN	protein_coding	serine carboxypeptidase-like 47	---	serine carboxypeptidase-like 47 (scpl47); FUNCTIONS IN: serine-type carboxypeptidase activity; INVOLVED IN: proteolysis; LOCATED IN: endomembrane system; EXPRESSED IN: 7 plant structures; EXPRESSED DURING: 4 anthesis, C globular stage, petal differentiation and expansion stage; CONTAINS InterPro DOMAIN/s: Peptidase S10, serine carboxypeptidase (InterPro:IPR001563), Peptidase S10, serine carboxype…	0	1	0	1
1341	Chr2	TAIR10	17001001	17002000	0	0.418963	0.382432	-1.38757	-1.5851	-2.3798	0.69273	0.710755	-1.26654	5.44204	5.43622	4.7433	4.55862	0.199946	0.233689	0.00162309	0.000404248	0.245819	0.299787	0.0456363	0.200535	0	1	0	0	1	0	0	1	0	AT2G40750	0	Chr2	17000454	17002468	-	NaN	protein_coding	WRKY DNA-binding protein 54	member of WRKY Transcription Factor; Group III	WRKY DNA-binding protein 54 (WRKY54); CONTAINS InterPro DOMAIN/s: DNA-binding WRKY (InterPro:IPR003657); BEST Arabidopsis thaliana protein match is: WRKY DNA-binding protein 70 (TAIR:AT3G56400.1); Has 3183 Blast hits to 2752 proteins in 165 species: Archae - 0; Bacteria - 0; Metazoa - 0; Fungi - 0; Plants - 3171; Viruses - 0; Other Eukaryotes - 12 (source: NCBI BLink).	0.452967	0.597814	0.776622	0.0841375
690	Chr1	TAIR10	24008001	24009000	0	-0.618565	0.281858	-1.05104	-0.732139	-1.06017	-0.373324	0.578055	-1.4261	5.95615	6.05456	5.77002	5.88431	0.245009	0.265167	0.000618093	0.011149	0.247746	0.343651	0.151531	0.183224	0	1	0	0	1	0	0	1	1	AT1G64620	0	Chr1	24006992	24008694	+	NaN	protein_coding	Dof-type zinc finger DNA-binding family protein	---	Dof-type zinc finger DNA-binding family protein; CONTAINS InterPro DOMAIN/s: Zinc finger, Dof-type (InterPro:IPR003851); BEST Arabidopsis thaliana protein match is: Dof-type zinc finger DNA-binding family protein (TAIR:AT4G24060.1); Has 1750 Blast hits to 1190 proteins in 84 species: Archae - 0; Bacteria - 10; Metazoa - 53; Fungi - 16; Plants - 1095; Viruses - 0; Other Eukaryotes - 576 (source: N…	0.00669465	0.995254	0	1
2564	Chr5	TAIR10	1793001	1794000	0	0.187632	0.319052	-0.404585	-2.74407	-0.772596	0.112704	-0.279265	-2.33827	5.06176	5.20307	4.95529	3.7082	0.434142	0.318688	0.28448	3.27586e-06	0.247829	14.3182	0.705504	0.560928	1	1	0	0	0	0	0	0	0	AT5G05965	-368	Chr5	1790788	1792634	-	NaN	protein_coding	---	---	unknown protein; FUNCTIONS IN: molecular_function unknown; INVOLVED IN: biological_process unknown; LOCATED IN: chloroplast; BEST Arabidopsis thaliana protein match is: unknown protein (TAIR:AT2G39855.2); Has 30201 Blast hits to 17322 proteins in 780 species: Archae - 12; Bacteria - 1396; Metazoa - 17338; Fungi - 3422; Plants - 5037; Viruses - 0; Other Eukaryotes - 2996 (source: NCBI BLink).	-0.702614	0.629318	-0.30895	0.68281
3250	Chr5	TAIR10	25505001	25506000	0	0.0988288	0.195145	-0.725373	-1.99563	-0.0327404	0.164778	-1.46227	-3.0388	4.93745	5.08028	4.72237	4.0006	0.482345	0.428316	0.106916	0.000231185	0.248297	1.31008	0.614918	0.968673	0	2	0	1	1	0	0	0	0	NaN	NaN	NaN	NaN	NaN	NaN	NaN	NaN	NaN	NaN	NaN	NaN	NaN	NaN	NaN
1157	Chr2	TAIR10	10828001	10829000	0	-1.45523	-0.328352	-0.902504	-1.33425	-1.17268	-0.876202	-0.202867	-2.67271	6.39512	6.26307	6.47974	6.24687	0.00236864	0.232596	0.000155831	4.3868e-08	0.248569	0.237112	0.495411	0.0644993	1	1	0	0	0	0	0	0	0	AT2G25440	0	Chr2	10826735	10829402	+	NaN	protein_coding	receptor like protein 20	---	receptor like protein 20 (RLP20); FUNCTIONS IN: kinase activity; INVOLVED IN: signal transduction; LOCATED IN: endomembrane system; EXPRESSED IN: 6 plant structures; EXPRESSED DURING: LP.06 six leaves visible, LP.04 four leaves visible, 4 anthesis, petal differentiation and expansion stage, LP.08 eight leaves visible; CONTAINS InterPro DOMAIN/s: Leucine-rich repeat (InterPro:IPR001611); BEST Arab…	-0.36257	0.596615	0.530515	0.291215
1454	Chr3	TAIR10	418001	419000	0	0.107596	-0.121154	-0.881802	-2.1543	-0.752827	0.064325	-0.0990092	-3.77891	5.39401	5.27382	5.09248	4.38424	0.471603	0.474434	0.0262629	4.20395e-06	0.248797	0.101507	0.621869	0.482413	0	0	0	0	0	0	0	0	0	AT3G02240	0	Chr3	418459	419164	+	NaN	protein_coding	---	Encodes a root meristem growth factor (RGF). Belongs to a family of functionally redundant homologous peptides that are secreted, tyrosine-sulfated, and expressed mainly in the stem cell area and the innermost layer of central columella cells. RGFs are required for maintenance of the root stem cell niche and transit amplifying cell proliferation. Members of this family include: At5g60810 (RGF1), …	root meristem growth factor 7 (RGF7); FUNCTIONS IN: molecular_function unknown; INVOLVED IN: biological_process unknown; LOCATED IN: endomembrane system; EXPRESSED IN: root, stamen; EXPRESSED DURING: 4 anthesis; BEST Arabidopsis thaliana protein match is: unknown protein (TAIR:AT3G02242.1); Has 6 Blast hits to 6 proteins in 2 species: Archae - 0; Bacteria - 0; Metazoa - 0; Fungi - 0; Plants - 6; …	0	1	0.137504	1
2175	Chr4	TAIR10	7434001	7435000	0	0.512772	-0.082145	-1.29326	-0.128172	-0.185033	0.855503	0.877851	-1.96091	5.94413	5.55553	5.23693	5.75314	0.0715299	0.485548	0.000452484	0.449521	0.250119	1.20345	0.205293	0.182711	1	1	0	0	0	0	0	0	0	AT4G12545	0	Chr4	7434199	7434858	+	NaN	protein_coding	Bifunctional inhibitor/lipid-transfer protein/seed storage 2S albumin superfamily protein	---	Bifunctional inhibitor/lipid-transfer protein/seed storage 2S albumin superfamily protein; FUNCTIONS IN: molecular_function unknown; INVOLVED IN: lipid transport; LOCATED IN: endomembrane system; CONTAINS InterPro DOMAIN/s: Bifunctional inhibitor/plant lipid transfer protein/seed storage (InterPro:IPR016140), Plant lipid transfer protein/seed storage/trypsin-alpha amylase inhibitor (InterPro:IPR0…	-0.137504	1	0	1
1961	Chr3	TAIR10	20583001	20584000	0	0.500327	-0.115212	-2.41901	-1.32701	0.117445	0.839594	-0.0376557	-3.83032	4.94334	4.78382	3.71622	4.1354	0.198241	0.483385	9.34265e-05	0.012124	0.252822	0.514068	0.225907	1.19617	0	0	0	1	1	0	1	0	0	NaN	NaN	NaN	NaN	NaN	NaN	NaN	NaN	NaN	NaN	NaN	NaN	NaN	NaN	NaN
3169	Chr5	TAIR10	22869001	22870000	0	0.500239	0.484403	-1.3017	-0.0218891	-0.689103	0.84432	0.433951	-2.13777	6.3999	6.18552	5.6879	6.27935	0.0395072	0.0642819	3.05006e-05	0.49777	0.255526	0.0548173	0.243224	0.941074	0	0	0	0	0	0	0	0	0	AT5G56470	0	Chr5	22869060	22869958	+	NaN	protein_coding	FAD-dependent oxidoreductase family protein	---	FAD-dependent oxidoreductase family protein; FUNCTIONS IN: oxidoreductase activity, D-arabinono-1,4-lactone oxidase activity; INVOLVED IN: oxidation reduction; LOCATED IN: membrane; CONTAINS InterPro DOMAIN/s: D-arabinono-1,4-lactone oxidase (InterPro:IPR007173); BEST Arabidopsis thaliana protein match is: D-arabinono-1,4-lactone oxidase family protein (TAIR:AT1G32300.1); Has 1807 Blast hits to 1…	0	1	0.137504	1
2150	Chr4	TAIR10	6902001	6903000	0	-2.89443	-0.333689	-1.22893	-0.771423	-1.0363	-1.71374	-0.694307	-1.69809	4.63817	5.19703	4.94683	5.09776	0.000946361	0.342784	0.0028288	0.0432397	0.256329	0.351481	0.160394	0.146689	0	1	0	0	1	0	0	0	0	AT4G11350	0	Chr4	6901682	6904244	+	NaN	protein_coding	Protein of unknown function (DUF604)	---	Protein of unknown function (DUF604); CONTAINS InterPro DOMAIN/s: Protein of unknown function DUF604 (InterPro:IPR006740); BEST Arabidopsis thaliana protein match is: Protein of unknown function (DUF604) (TAIR:AT4G23490.1); Has 568 Blast hits to 557 proteins in 86 species: Archae - 0; Bacteria - 0; Metazoa - 99; Fungi - 181; Plants - 281; Viruses - 0; Other Eukaryotes - 7 (source: NCBI BLink).	1.23758	0.163703	0.726239	0.203083
1953	Chr3	TAIR10	20119001	20120000	0	0.274373	-0.0208217	-0.599185	-1.47916	-0.29753	0.464599	0.284579	-1.41354	6.17787	5.85113	5.91821	5.43901	0.259816	0.498845	0.0448584	5.53645e-06	0.256724	1.14917	0.405005	0.665823	0	1	0	0	0	0	0	0	0	AT3G54340	0	Chr3	20119173	20121170	-	0	protein_coding	K-box region and MADS-box transcription factor family protein	Floral homeotic gene encoding a MADS domain protein homologous to SRF transcription factors. Specifies petal and stamen identities. Associates with PISTILLATA.	APETALA 3 (AP3); CONTAINS InterPro DOMAIN/s: Transcription factor, MADS-box (InterPro:IPR002100), Transcription factor, K-box (InterPro:IPR002487); BEST Arabidopsis thaliana protein match is: AGAMOUS-like 71 (TAIR:AT5G51870.1); Has 6838 Blast hits to 6837 proteins in 855 species: Archae - 0; Bacteria - 0; Metazoa - 626; Fungi - 302; Plants - 5820; Viruses - 0; Other Eukaryotes - 90 (source: NCBI …	-0.115477	1	1.79141	0.00169149
891	Chr1	TAIR10	29266001	29267000	0	1.05244	0.360913	-2.34247	-0.446177	0.248742	1.78759	1.26941	-2.05904	5.05837	4.89221	3.59442	4.41093	0.00593264	0.314187	0.000307352	0.300649	0.25867	0.556568	0.0644236	3.55576	0	0	0	0	0	0	0	0	0	NaN	NaN	NaN	NaN	NaN	NaN	NaN	NaN	NaN	NaN	NaN	NaN	NaN	NaN	NaN
1148	Chr2	TAIR10	10530001	10531000	0	-2.23629	-0.129279	-0.764337	-0.721064	-0.687305	-1.31742	0.298707	-1.3248	6.04056	6.22911	6.38928	6.39036	2.53913e-05	0.445293	0.00217285	0.00265269	0.258711	2.4966	0.26853	0.0240044	1	1	0	0	0	0	0	0	1	AT2G24740	0	Chr2	10529690	10531957	-	NaN	protein_coding	SET domain group 21	Encodes a SU(VAR)3-9 homolog, a SET domain protein (Homology Subgroup V; Orthology Group 1). Known SET domain proteins are involved in epigenetic control of gene expression. There are 10 SUVH genes in Arabidopsis and members of this subfamily of the SET proteins have an additional conserved SRA domain. This protein is a putative histone methyltransferase (predicted to methylate H3K9/20) related t…	SET domain group 21 (SDG21); FUNCTIONS IN: histone methyltransferase activity; INVOLVED IN: regulation of gene expression, epigenetic; LOCATED IN: nucleus; CONTAINS InterPro DOMAIN/s: SET domain (InterPro:IPR001214), AT hook, DNA-binding motif (InterPro:IPR017956), SRA-YDG (InterPro:IPR003105), Pre-SET zinc-binding sub-group (InterPro:IPR003606), Pre-SET domain (InterPro:IPR007728), Post-SET doma…	0	1	0	1
619	Chr1	TAIR10	22529001	22530000	0	0.284886	0.0675406	-1.65679	-0.208187	-0.165214	0.484973	0.387156	-2.5688	5.85435	5.64372	5.08595	5.73787	0.284469	0.486489	1.5742e-05	0.378715	0.259228	0.699842	0.215933	0.115706	0	0	0	0	0	0	0	0	0	AT1G61130	0	Chr1	22529024	22531784	-	NaN	protein_coding	serine carboxypeptidase-like 32	---	serine carboxypeptidase-like 32 (SCPL32); FUNCTIONS IN: serine-type carboxypeptidase activity; INVOLVED IN: proteolysis; LOCATED IN: endomembrane system; EXPRESSED IN: male gametophyte, root, flower; EXPRESSED DURING: 4 anthesis; CONTAINS InterPro DOMAIN/s: Peptidase S10, serine carboxypeptidase (InterPro:IPR001563), Peptidase S10, serine carboxypeptidase, active site (InterPro:IPR018202); BEST A…	0.263034	0.831812	0.263034	0.831812
798	Chr1	TAIR10	26055001	26056000	0	-0.545818	0.14737	-0.0941487	-2.32175	-1.37281	-0.320852	-0.469769	-3.50314	6.00849	6.01332	6.2637	5.12447	0.281093	0.422466	0.463578	6.90473e-11	0.260176	1.92616	0.948183	0.256986	0	1	0	0	0	0	0	0	0	AT1G69310	0	Chr1	26054308	26058105	-	NaN	protein_coding	WRKY DNA-binding protein 57	Encodes WRKY57, a member of the WRKY Transcription Factor. Activation of WRKY57 confers drought tolerance.	WRKY DNA-binding protein 57 (WRKY57); CONTAINS InterPro DOMAIN/s: DNA-binding WRKY (InterPro:IPR003657); BEST Arabidopsis thaliana protein match is: WRKY DNA-binding protein 48 (TAIR:AT5G49520.1); Has 3531 Blast hits to 3086 proteins in 203 species: Archae - 2; Bacteria - 2; Metazoa - 6; Fungi - 13; Plants - 3487; Viruses - 0; Other Eukaryotes - 21 (source: NCBI BLink).	0.366861	0.520559	0.396547	0.23067
1412	Chr2	TAIR10	18729001	18730000	0	-1.41255	-0.113105	-0.990782	-1.43315	-0.553164	-0.827798	-0.317451	-2.19813	5.71789	5.83376	5.75983	5.49309	0.0213473	0.467395	0.00135897	7.40552e-06	0.261243	0.476826	0.378846	0.443472	0	1	0	0	0	0	0	0	1	AT2G45434	0	Chr2	18729733	18729843	+	NaN	protein_coding	---	---	unknown protein; Has 30201 Blast hits to 17322 proteins in 780 species: Archae - 12; Bacteria - 1396; Metazoa - 17338; Fungi - 3422; Plants - 5037; Viruses - 0; Other Eukaryotes - 2996 (source: NCBI BLink).	0	1	0	1
2539	Chr5	TAIR10	1025001	1026000	0	0.093293	0.129745	-0.717752	-1.52572	-0.804054	0.16044	-0.267958	-2.68312	5.89772	5.78078	5.67447	5.2216	0.469788	0.447396	0.0269132	1.45683e-05	0.262566	2.91972	0.578242	0.310025	1	2	0	0	1	0	0	0	0	AT5G03840	0	Chr5	1024641	1025812	-	0	protein_coding	PEBP (phosphatidylethanolamine-binding protein) family protein	Controls inflorescence meristem identity. Involved in the floral initiation process. Ortholog of the Antirrhinum gene CENTRORADIALIS (CEN). Involved in protein trafficking to the protein storage vacuole.	TERMINAL FLOWER 1 (TFL1); CONTAINS InterPro DOMAIN/s: Phosphatidylethanolamine-binding, conserved site (InterPro:IPR001858), Phosphatidylethanolamine-binding protein PEBP (InterPro:IPR008914); BEST Arabidopsis thaliana protein match is: centroradialis (TAIR:AT2G27550.1); Has 1807 Blast hits to 1807 proteins in 277 species: Archae - 0; Bacteria - 0; Metazoa - 736; Fungi - 347; Plants - 385; Viruse…	0.504473	0.741107	0.246161	0.780042
954	Chr2	TAIR10	1001001	1002000	0	1.06103	0.520034	-0.639083	-1.13731	-1.47845	0.614439	0.670845	-2.01884	5.55425	5.34603	4.8975	4.5687	0.000868583	0.133404	0.129374	0.0125097	0.266229	0.126427	0.519503	0.130518	1	1	0	0	0	0	0	0	0	NaN	NaN	NaN	NaN	NaN	NaN	NaN	NaN	NaN	NaN	NaN	NaN	NaN	NaN	NaN
1769	Chr3	TAIR10	10531001	10532000	0	0.453318	0.303174	-1.35912	-0.753847	-1.12435	0.788292	0.836829	-2.06758	6.33745	6.06522	5.6219	5.87345	0.0679384	0.238737	2.03853e-05	0.00914008	0.269357	0.467298	0.206866	0.197477	1	1	0	0	0	0	0	0	0	NaN	NaN	NaN	NaN	NaN	NaN	NaN	NaN	NaN	NaN	NaN	NaN	NaN	NaN	NaN
2460	Chr4	TAIR10	16579001	16580000	0	-0.692882	-0.0269714	-2.07717	-2.04654	0.00128318	-0.399047	-0.918396	-4.85732	4.72386	4.97776	4.08137	3.9844	0.341604	0.498942	0.000146573	0.000169736	0.269591	0.944939	0.401031	1.00223	0	0	0	0	0	0	0	0	0	NaN	NaN	NaN	NaN	NaN	NaN	NaN	NaN	NaN	NaN	NaN	NaN	NaN	NaN	NaN
1871	Chr3	TAIR10	16921001	16922000	0	-0.700309	-1.67526	-0.487333	-1.92966	-1.24193	-0.403107	-0.605581	-1.58712	4.64853	4.19889	4.77336	3.96762	0.345586	0.00424937	0.243064	0.000449114	0.269836	0.469395	0.530669	0.216978	0	2	0	0	0	0	0	0	0	AT3G46070	-45	Chr3	16920445	16920957	-	NaN	protein_coding	C2H2-type zinc finger family protein	---	C2H2-type zinc finger family protein; FUNCTIONS IN: sequence-specific DNA binding transcription factor activity, zinc ion binding, nucleic acid binding; INVOLVED IN: regulation of transcription; LOCATED IN: intracellular; EXPRESSED IN: root, flower; EXPRESSED DURING: petal differentiation and expansion stage; CONTAINS InterPro DOMAIN/s: Zinc finger, C2H2-like (InterPro:IPR015880), Zinc finger, C2…	0	1	0	1
790	Chr1	TAIR10	25849001	25850000	0	0.398438	0.374687	-2.96755	-0.869932	-0.199613	0.694073	-0.0311006	-4.17202	5.42796	5.42944	3.97994	4.91229	0.220016	0.241752	8.3586e-08	0.0323655	0.270107	1.1742	0.168751	0.627906	0	0	0	0	1	0	0	0	0	AT1G68800	-462	Chr1	25847066	25848540	-	0	protein_coding	TCP domain protein 12	Encodes a TCP transcription factor, closely related to teosinte branched1, arrests axillary bud development and prevents axillary bud outgrowth. Transcription level and mutant phenotype are weaker than its homolog BRC1 (At3G18550).	TCP domain protein 12 (TCP12); CONTAINS InterPro DOMAIN/s: Transcription factor, TCP (InterPro:IPR005333), CYC/TB1, R domain (InterPro:IPR017888), Transcription factor TCP subgroup (InterPro:IPR017887); BEST Arabidopsis thaliana protein match is: TCP family transcription factor (TAIR:AT1G67260.1); Has 30201 Blast hits to 17322 proteins in 780 species: Archae - 12; Bacteria - 1396; Metazoa - 17338…	-0.695145	0.36618	2.22542	0.000560356
115	Chr1	TAIR10	4163001	4164000	0	0.456403	0.385492	-1.27079	-0.905772	-0.980633	0.795204	0.702357	-1.62418	6.71685	6.39406	6.03649	6.18437	0.0359721	0.111436	3.84044e-06	0.000385625	0.270261	0.290742	0.122155	0.0397268	1	1	0	0	0	0	0	0	0	AT1G12260	0	Chr1	4162832	4165852	-	NaN	protein_coding	NAC 007	Encodes a NAC-domain transcription factor. Expressed in the vascular tissue.	NAC 007 (NAC007); CONTAINS InterPro DOMAIN/s: No apical meristem (NAM) protein (InterPro:IPR003441); BEST Arabidopsis thaliana protein match is: Arabidopsis NAC domain containing protein 26 (TAIR:AT1G62700.1); Has 3158 Blast hits to 3153 proteins in 90 species: Archae - 0; Bacteria - 0; Metazoa - 15; Fungi - 2; Plants - 3027; Viruses - 0; Other Eukaryotes - 114 (source: NCBI BLink).	-1	0.45815	0.835369	0.0808724
3125	Chr5	TAIR10	22009001	22010000	0	0.587873	0.107491	-2.10979	-0.48876	-0.311737	1.03175	1.0202	-1.73135	5.11755	4.9874	3.99333	4.68807	0.11833	0.478465	0.000185939	0.238636	0.273724	0.807927	0.0985759	0.221696	0	0	0	0	0	0	0	0	0	AT5G54210	0	Chr5	22008612	22009532	+	NaN	protein_coding	Haloacid dehalogenase-like hydrolase (HAD) superfamily protein	---	Haloacid dehalogenase-like hydrolase (HAD) superfamily protein; FUNCTIONS IN: phosphoprotein phosphatase activity; INVOLVED IN: biological_process unknown; LOCATED IN: nucleus; CONTAINS InterPro DOMAIN/s: FCP1-like phosphatase, phosphatase domain (InterPro:IPR011947), NLI interacting factor (InterPro:IPR004274); BEST Arabidopsis thaliana protein match is: Haloacid dehalogenase-like hydrolase (HAD…	0	1	0	1
1869	Chr3	TAIR10	16722001	16723000	0	0.409657	0.251985	-1.37314	-0.656465	-0.120896	0.720995	0.303951	-2.14679	6.36423	6.07664	5.66304	5.97192	0.0950144	0.298826	1.22635e-05	0.0194054	0.274875	0.0931395	0.219918	0.690734	1	1	0	0	0	0	0	0	0	AT3G45560	0	Chr3	16719630	16722674	-	NaN	protein_coding	zinc finger (C3HC4-type RING finger) family protein	---	zinc finger (C3HC4-type RING finger) family protein; FUNCTIONS IN: zinc ion binding; CONTAINS InterPro DOMAIN/s: Zinc finger, RING-type, conserved site (InterPro:IPR017907), Zinc finger, RING-type (InterPro:IPR001841); BEST Arabidopsis thaliana protein match is: RING/U-box protein with C6HC-type zinc finger (TAIR:AT3G45580.1); Has 537 Blast hits to 473 proteins in 76 species: Archae - 0; Bacteria…	0	1	0	1
2234	Chr4	TAIR10	8786001	8787000	0	0.268955	0.468111	-1.37363	-0.0146357	-0.0684354	0.47385	-0.0194587	-2.7893	5.87026	5.86218	5.24561	5.85909	0.300774	0.108156	0.000175582	0.499254	0.275098	1.08192	0.340231	0.663611	0	0	0	0	0	0	0	0	0	NaN	NaN	NaN	NaN	NaN	NaN	NaN	NaN	NaN	NaN	NaN	NaN	NaN	NaN	NaN
3241	Chr5	TAIR10	25274001	25275000	0	0.239853	0.390641	-1.55754	-0.542191	-0.885292	0.423325	0.947363	-1.05233	5.58959	5.62084	4.89509	5.32284	0.358475	0.202886	0.000163758	0.121669	0.275824	0.415463	0.193726	0.240691	1	0	0	0	0	0	0	0	0	NaN	NaN	NaN	NaN	NaN	NaN	NaN	NaN	NaN	NaN	NaN	NaN	NaN	NaN	NaN
441	Chr1	TAIR10	17379001	17380000	0	0.29094	-0.11596	-1.73289	-0.50436	-0.492538	0.513921	-0.037763	-2.94817	6.60538	6.12858	5.78603	6.35566	0.185796	0.45836	4.96641e-09	0.0409523	0.276355	0.515393	0.259727	0.011883	1	1	0	0	0	0	0	0	0	AT1G47390	0	Chr1	17379544	17380656	+	NaN	protein_coding	F-box and associated interaction domains-containing protein	---	F-box and associated interaction domains-containing protein; CONTAINS InterPro DOMAIN/s: F-box domain, cyclin-like (InterPro:IPR001810), F-box domain, Skp2-like (InterPro:IPR022364), F-box associated domain, type 1 (InterPro:IPR006527), F-box associated interaction domain (InterPro:IPR017451); BEST Arabidopsis thaliana protein match is: F-box and associated interaction domains-containing protein …	-0.137504	1	-0.137504	1
683	Chr1	TAIR10	23838001	23839000	0	-3.41038	-0.570359	-1.22017	-1.17507	-1.7058	-1.93197	0.123374	-0.780353	4.67056	5.21608	5.10997	5.06116	6.76217e-05	0.163534	0.0016532	0.00196492	0.276838	1.559	0.220071	0.184352	0	0	0	0	0	0	0	0	0	NaN	NaN	NaN	NaN	NaN	NaN	NaN	NaN	NaN	NaN	NaN	NaN	NaN	NaN	NaN
1372	Chr2	TAIR10	17743001	17744000	0	0.0796948	0.365079	0.352552	-1.09635	-0.0076519	0.141485	-0.905209	-2.9787	6.15801	6.10178	6.45886	5.70975	0.473491	0.166522	0.134472	0.00026092	0.276862	2.36056	1.26946	0.987928	0	1	0	1	1	0	0	1	0	NaN	NaN	NaN	NaN	NaN	NaN	NaN	NaN	NaN	NaN	NaN	NaN	NaN	NaN	NaN
412	Chr1	TAIR10	13457001	13458000	0	-0.367899	0.277106	-1.69123	-0.331572	-0.251904	-0.207351	0.0422121	-2.07198	5.44433	5.61481	4.89645	5.49638	0.418903	0.318187	3.84554e-05	0.275476	0.280065	0.731033	0.10123	0.137011	0	0	0	0	0	0	0	0	0	AT1G36060	-671	Chr1	13454496	13456331	-	1	protein_coding	Integrase-type DNA-binding superfamily protein	encodes a member of the DREB subfamily A-6 of ERF/AP2 transcription factor family. The protein contains one AP2 domain. There are 8 members in this subfamily including RAP2.4.	Integrase-type DNA-binding superfamily protein; FUNCTIONS IN: DNA binding, sequence-specific DNA binding transcription factor activity; INVOLVED IN: regulation of transcription, DNA-dependent; LOCATED IN: nucleus; EXPRESSED IN: root, flower; EXPRESSED DURING: petal differentiation and expansion stage; CONTAINS InterPro DOMAIN/s: DNA-binding, integrase-type (InterPro:IPR016177), Pathogenesis-relat…	3.43879	6.41945e-05	0.285402	0.699657
2889	Chr5	TAIR10	15136001	15137000	0	0.577963	0.164855	-2.51647	0.0694743	0.0770559	1.03141	1.23589	-2.58815	5.15882	5.05128	3.84334	5.01452	0.119251	0.448707	1.94358e-05	0.490717	0.281402	0.763528	0.0140479	0.0510445	0	0	0	0	0	0	0	0	0	AT5G37990	-502	Chr5	15133737	15135500	-	1	protein_coding	S-adenosyl-L-methionine-dependent methyltransferases superfamily protein	---	S-adenosyl-L-methionine-dependent methyltransferases superfamily protein; FUNCTIONS IN: S-adenosylmethionine-dependent methyltransferase activity, methyltransferase activity; INVOLVED IN: biological_process unknown; LOCATED IN: endomembrane system; EXPRESSED IN: hypocotyl, root; CONTAINS InterPro DOMAIN/s: SAM dependent carboxyl methyltransferase (InterPro:IPR005299); BEST Arabidopsis thaliana pr…	-0.765535	0.247789	1.08246	0.0310449
2963	Chr5	TAIR10	17076001	17077000	0	1.58128	0.644271	-2.7374	-0.0449052	-0.583873	0.883864	0.562263	-2.64351	5.30103	5.01732	3.38313	4.58929	3.55258e-06	0.0994692	7.8902e-05	0.497093	0.282681	0.0678581	0.017455	0.859902	0	1	0	0	0	0	0	0	0	AT5G42635	0	Chr5	17076227	17076725	+	NaN	protein_coding	glycine-rich protein	---	glycine-rich protein; Has 30201 Blast hits to 17322 proteins in 780 species: Archae - 12; Bacteria - 1396; Metazoa - 17338; Fungi - 3422; Plants - 5037; Viruses - 0; Other Eukaryotes - 2996 (source: NCBI BLink).	0	1	0	1
1067	Chr2	TAIR10	8241001	8242000	0	0.337726	0.814755	-1.2078	-0.00834558	-0.523127	0.612074	0.734775	-1.2995	5.91648	6.04451	5.33698	5.87435	0.218574	0.00258896	0.000714833	0.499755	0.288241	0.0515487	0.036599	0.972253	0	1	0	0	0	0	0	0	0	AT2G19000	0	Chr2	8241104	8241784	+	NaN	protein_coding	---	---	unknown protein; FUNCTIONS IN: molecular_function unknown; INVOLVED IN: biological_process unknown; LOCATED IN: endomembrane system; EXPRESSED IN: 9 plant structures; EXPRESSED DURING: L mature pollen stage, M germinated pollen stage, 4 anthesis, C globular stage, petal differentiation and expansion stage; Has 71 Blast hits to 71 proteins in 12 species: Archae - 0; Bacteria - 0; Metazoa - 2; Fung…	0	1	0	1
2487	Chr4	TAIR10	17460001	17461000	0	-0.899034	-1.08925	-2.52551	-2.16194	-0.932107	-0.497123	-0.817239	-3.71779	4.29654	4.22575	3.49574	3.54194	0.310336	0.0642363	0.000161318	0.000704543	0.288283	0.142827	0.191031	0.397741	1	0	0	0	0	0	0	0	0	AT4G37050	-232	Chr4	17457135	17459770	-	NaN	protein_coding	PATATIN-like protein 4	Patatin-related phospholipase A. Expressed in the floral gynaecium and is induced by abscisic acid (ABA) or phosphate deficiency in roots.	PATATIN-like protein 4 (PLP4); CONTAINS InterPro DOMAIN/s: Acyl transferase/acyl hydrolase/lysophospholipase (InterPro:IPR016035), Patatin (InterPro:IPR002641); BEST Arabidopsis thaliana protein match is: Acyl transferase/acyl hydrolase/lysophospholipase superfamily protein (TAIR:AT4G37070.2); Has 2044 Blast hits to 2033 proteins in 371 species: Archae - 0; Bacteria - 489; Metazoa - 210; Fungi - …	-0.115477	1	0.29956	0.711071
1847	Chr3	TAIR10	16305001	16306000	0	0.273771	0.0173339	-1.08257	-1.38677	-0.772829	0.4994	-0.198779	-2.70756	6.61941	6.20532	6.12096	5.9376	0.20633	0.49867	5.81137e-05	3.51516e-07	0.29107	1.20434	0.42897	0.284548	0	1	0	0	0	0	0	0	0	AT3G44760	0	Chr3	16305322	16306378	+	NaN	protein_coding	---	---	unknown protein; FUNCTIONS IN: molecular_function unknown; INVOLVED IN: biological_process unknown; LOCATED IN: endomembrane system; EXPRESSED IN: root, flower; EXPRESSED DURING: petal differentiation and expansion stage; BEST Arabidopsis thaliana protein match is: Protein of unknown function (DUF626) (TAIR:AT3G44770.1); Has 9 Blast hits to 9 proteins in 2 species: Archae - 0; Bacteria - 0; Metaz…	0.137504	1	0	1
667	Chr1	TAIR10	23436001	23437000	0	0.489359	-0.579735	-2.4961	-0.864635	0.100085	0.268228	-0.37713	-4.27797	4.99203	4.62132	3.7325	4.42204	0.200182	0.232773	4.80115e-05	0.0729244	0.29112	0.212181	0.26312	1.26512	0	0	0	0	0	0	0	0	0	NaN	NaN	NaN	NaN	NaN	NaN	NaN	NaN	NaN	NaN	NaN	NaN	NaN	NaN	NaN
1830	Chr3	TAIR10	14930001	14931000	0	0.39138	-0.0192355	-1.54992	-0.621982	-0.297786	0.714182	0.932212	-1.70792	5.3584	5.18339	4.59646	4.96866	0.235054	0.499379	0.000782507	0.116696	0.291453	1.03986	0.0485272	0.353244	1	1	0	0	0	0	0	0	0	AT3G42830	0	Chr3	14929714	14930678	-	NaN	protein_coding	RING/U-box superfamily protein	---	RING/U-box superfamily protein; CONTAINS InterPro DOMAIN/s: Zinc finger, RING-type (InterPro:IPR001841); BEST Arabidopsis thaliana protein match is: RING-box 1 (TAIR:AT5G20570.1); Has 1105 Blast hits to 1103 proteins in 231 species: Archae - 0; Bacteria - 0; Metazoa - 490; Fungi - 231; Plants - 178; Viruses - 3; Other Eukaryotes - 203 (source: NCBI BLink).	0	1	0	1
245	Chr1	TAIR10	7818001	7819000	0	0.54352	0.25437	-1.67861	-0.712239	-0.53812	1.01431	0.797889	-2.05132	5.45412	5.33397	4.55394	4.94364	0.105537	0.36545	0.00031823	0.0766616	0.30182	0.515546	0.0999763	0.139479	0	0	0	0	0	0	0	0	1	AT1G22150	0	Chr1	7818361	7821344	+	NaN	protein_coding	sulfate transporter 1;3	sulfate transporter Sultr1;3	sulfate transporter 1;3 (SULTR1;3); FUNCTIONS IN: sulfate transmembrane transporter activity; INVOLVED IN: sulfate transport, transport, transmembrane transport; LOCATED IN: integral to membrane, membrane; EXPRESSED IN: petal, leaf whorl, sperm cell, flower, pollen tube; EXPRESSED DURING: 4 anthesis, petal differentiation and expansion stage; CONTAINS InterPro DOMAIN/s: Sulphate transporter (Inte…	-0.823122	0.132498	-0.716207	0.187742
689	Chr1	TAIR10	23991001	23992000	0	-1.99556	-0.799521	-3.03198	-2.09748	-1.14955	-1.06907	-0.0890808	-2.77248	4.38462	4.62859	3.60896	3.94503	0.041112	0.115942	1.67374e-06	0.000141872	0.302515	0.801307	0.0447211	0.292119	0	0	0	0	0	0	0	0	0	AT1G64585	-905	Chr1	23989933	23990097	-	NaN	protein_coding	ROTUNDIFOLIA like 22	---	ROTUNDIFOLIA like 22 (RTFL22); CONTAINS InterPro DOMAIN/s: DVL (InterPro:IPR012552); Has 17 Blast hits to 17 proteins in 7 species: Archae - 0; Bacteria - 0; Metazoa - 0; Fungi - 0; Plants - 17; Viruses - 0; Other Eukaryotes - 0 (source: NCBI BLink).	0	1	0	1
1007	Chr2	TAIR10	6133001	6134000	0	0.732959	0.548215	-1.7471	-0.523654	-0.249975	1.37336	0.728565	-2.90629	5.7637	5.64447	4.73262	5.25793	0.0150072	0.0821763	6.01565e-05	0.141781	0.303748	0.141033	0.249215	0.354676	0	0	0	0	0	0	0	0	0	NaN	NaN	NaN	NaN	NaN	NaN	NaN	NaN	NaN	NaN	NaN	NaN	NaN	NaN	NaN
1123	Chr2	TAIR10	9711001	9712000	0	0.990954	0.623808	-1.79982	-0.677469	-0.16706	0.528668	-0.279588	-2.83471	5.92752	5.70878	4.74156	5.21668	0.00038073	0.0433774	3.25448e-05	0.0643643	0.303811	2.60931	0.223395	0.605806	0	1	0	0	0	0	0	0	1	AT2G22805	-291	Chr2	9712291	9713001	+	NaN	protein_coding	Defensin-like (DEFL) family protein	Encodes a defensin-like (DEFL) family protein.	Defensin-like (DEFL) family protein; LOCATED IN: endomembrane system; BEST Arabidopsis thaliana protein match is: Defensin-like (DEFL) family protein (TAIR:AT2G22807.1); Has 35333 Blast hits to 34131 proteins in 2444 species: Archae - 798; Bacteria - 22429; Metazoa - 974; Fungi - 991; Plants - 531; Viruses - 0; Other Eukaryotes - 9610 (source: NCBI BLink).	0	1	0	1
1046	Chr2	TAIR10	7859001	7860000	0	0.319413	0.443708	-1.57301	-1.01471	-0.887401	0.169599	-0.0585958	-3.32481	5.71233	5.71053	4.96936	5.17152	0.262986	0.144936	9.05193e-05	0.0057925	0.305113	1.29757	0.357815	0.0669988	0	1	0	0	0	0	0	0	0	AT2G18080	0	Chr2	7857198	7859715	+	NaN	protein_coding	Serine carboxypeptidase S28 family protein	---	embryo sac development arrest 2 (EDA2); FUNCTIONS IN: serine-type peptidase activity; INVOLVED IN: proteolysis, megagametogenesis; LOCATED IN: endomembrane system; EXPRESSED IN: male gametophyte, flower, pollen tube; EXPRESSED DURING: L mature pollen stage, M germinated pollen stage, 4 anthesis; CONTAINS InterPro DOMAIN/s: Peptidase S28 (InterPro:IPR008758); BEST Arabidopsis thaliana protein matc…	0	1	0	1
2748	Chr5	TAIR10	7353001	7354000	0	0.48825	0.480881	-1.62329	-0.280951	-0.574878	0.259089	0.627243	-1.93689	6.06699	5.93487	5.21134	5.8151	0.0733271	0.0914145	9.66745e-06	0.293189	0.305818	0.131843	0.0881362	0.344246	0	1	0	0	0	0	0	0	1	AT5G22180	0	Chr5	7353070	7353706	-	NaN	protein_coding	---	---	unknown protein; BEST Arabidopsis thaliana protein match is: unknown protein (TAIR:AT5G22160.1); Has 30201 Blast hits to 17322 proteins in 780 species: Archae - 12; Bacteria - 1396; Metazoa - 17338; Fungi - 3422; Plants - 5037; Viruses - 0; Other Eukaryotes - 2996 (source: NCBI BLink).	0	1	0	1
1794	Chr3	TAIR10	11310001	11311000	0	0.443529	0.310046	-2.26936	0.0747959	-0.494408	0.836372	1.38691	0.194832	4.56696	4.72444	3.44545	4.48	0.285589	0.368473	0.000959578	0.492558	0.306453	0.633838	1.18898	1.363	0	0	0	0	0	0	0	0	0	AT3G29430	-356	Chr3	11311356	11312792	+	NaN	protein_coding	Terpenoid synthases superfamily protein	---	Terpenoid synthases superfamily protein; INVOLVED IN: isoprenoid biosynthetic process; EXPRESSED IN: root; CONTAINS InterPro DOMAIN/s: Polyprenyl synthetase-related (InterPro:IPR017446), Terpenoid synthase (InterPro:IPR008949), Polyprenyl synthetase (InterPro:IPR000092); BEST Arabidopsis thaliana protein match is: Terpenoid synthases superfamily protein (TAIR:AT3G32040.1); Has 16721 Blast hits to…	0	1	0	1
546	Chr1	TAIR10	20162001	20163000	0	0.115017	0.085487	-1.00515	-1.21549	-0.464797	0.219033	0.095201	-2.62815	6.49455	6.20477	6.11339	5.97668	0.433258	0.468653	0.000211282	6.97573e-06	0.309525	0.0531724	0.446946	0.447298	0	1	0	0	0	0	0	0	0	AT1G54020	0	Chr1	20161670	20163748	-	0	protein_coding	GDSL-like Lipase/Acylhydrolase superfamily protein	---	GDSL-like Lipase/Acylhydrolase superfamily protein; FUNCTIONS IN: hydrolase activity, acting on ester bonds, carboxylesterase activity; INVOLVED IN: lipid metabolic process; LOCATED IN: vacuole; EXPRESSED IN: 16 plant structures; EXPRESSED DURING: 10 growth stages; CONTAINS InterPro DOMAIN/s: Lipase, GDSL (InterPro:IPR001087); BEST Arabidopsis thaliana protein match is: GDSL-like Lipase/Acylhydro…	0.63196	0.415137	0.961268	0.0201507
1506	Chr3	TAIR10	2578001	2579000	0	-0.967403	-0.970568	-0.622426	-1.5248	-0.139162	-0.510218	-0.540414	-1.10498	5.55241	5.24696	5.66435	5.16388	0.133723	0.0183218	0.0564095	2.22096e-05	0.309826	0.285062	0.279677	0.833737	0	1	0	0	0	0	0	0	0	AT3G08500	0	Chr3	2576794	2578246	-	NaN	protein_coding	myb domain protein 83	Encodes a putative R2R3-type MYB transcription factor (MYB83).	myb domain protein 83 (MYB83); CONTAINS InterPro DOMAIN/s: SANT, DNA-binding (InterPro:IPR001005), Homeodomain-like (InterPro:IPR009057), Myb, DNA-binding (InterPro:IPR014778), HTH transcriptional regulator, Myb-type, DNA-binding (InterPro:IPR017930), Homeodomain-related (InterPro:IPR012287), Myb transcription factor (InterPro:IPR015495); BEST Arabidopsis thaliana protein match is: myb domain pro…	-0.479168	0.706104	-0.0317089	1
2325	Chr4	TAIR10	12100001	12101000	0	0.301453	0.233713	-1.92928	-0.578672	-0.626579	0.576968	0.510036	-2.54842	6.42901	6.15801	5.51275	6.13254	0.195216	0.312973	3.05516e-09	0.029746	0.312935	0.370532	0.138335	0.0398143	0	1	0	0	0	0	0	0	0	AT4G23090	0	Chr4	12100391	12101483	-	NaN	protein_coding	---	---	unknown protein; Has 7 Blast hits to 7 proteins in 2 species: Archae - 0; Bacteria - 0; Metazoa - 0; Fungi - 0; Plants - 7; Viruses - 0; Other Eukaryotes - 0 (source: NCBI BLink).	0	1	0.847997	0.184933
724	Chr1	TAIR10	24618001	24619000	0	-0.802437	0.0889196	-1.03154	-1.1117	-0.375531	-0.418507	-0.807988	-2.96172	5.78845	5.86542	5.65951	5.56989	0.171728	0.473069	0.00127213	0.000432218	0.314969	1.2508	0.483602	0.49566	1	0	0	0	0	0	0	0	0	NaN	NaN	NaN	NaN	NaN	NaN	NaN	NaN	NaN	NaN	NaN	NaN	NaN	NaN	NaN
2063	Chr4	TAIR10	361001	362000	0	-1.57868	-0.39078	-0.75038	-2.68842	-0.461693	-0.82207	-1.75409	-3.11627	4.71198	4.97775	4.92564	3.87803	0.0703206	0.320498	0.0747443	1.27579e-06	0.315418	0.636208	0.612188	0.707321	0	1	0	1	1	0	0	0	0	NaN	NaN	NaN	NaN	NaN	NaN	NaN	NaN	NaN	NaN	NaN	NaN	NaN	NaN	NaN
2730	Chr5	TAIR10	6724001	6725000	0	0.102163	-0.383557	-1.01726	-1.03804	-0.696449	0.197702	0.277713	-1.49381	6.42871	5.94856	6.04905	6.00457	0.448815	0.215914	0.000247626	0.000122857	0.316496	6.3679	0.189931	0.197167	0	1	0	0	0	0	0	0	0	AT5G19890	0	Chr5	6724115	6725923	-	NaN	protein_coding	Peroxidase superfamily protein	---	Peroxidase superfamily protein; FUNCTIONS IN: peroxidase activity, heme binding; INVOLVED IN: oxidation reduction, response to oxidative stress; LOCATED IN: nucleus, cytoplasm; EXPRESSED IN: 17 plant structures; EXPRESSED DURING: 10 growth stages; CONTAINS InterPro DOMAIN/s: Haem peroxidase (InterPro:IPR010255), Plant peroxidase (InterPro:IPR000823), Peroxidases heam-ligand binding site (InterPro…	0.137504	1	0	1
2975	Chr5	TAIR10	17346001	17347000	0	-1.57996	-0.0780086	-1.97915	-1.55604	-2.14951	-0.815184	0.875856	-1.47963	5.13475	5.43704	4.75157	4.87742	0.0359053	0.487964	3.9599e-06	9.60136e-05	0.31957	1.19256	0.144503	0.160242	0	1	0	0	0	0	0	0	0	AT5G43200	0	Chr5	17346141	17346764	-	0	protein_coding	Zinc finger, C3HC4 type (RING finger) family protein	---	Zinc finger, C3HC4 type (RING finger) family protein; FUNCTIONS IN: zinc ion binding; EXPRESSED IN: sperm cell; CONTAINS InterPro DOMAIN/s: Zinc finger, RING-type (InterPro:IPR001841), Zinc finger, C3HC4 RING-type (InterPro:IPR018957); BEST Arabidopsis thaliana protein match is: Zinc finger, C3HC4 type (RING finger) family protein (TAIR:AT3G28620.1); Has 1807 Blast hits to 1807 proteins in 277 sp…	-0.125531	1	0.807355	0.162756
406	Chr1	TAIR10	13102001	13103000	0	0.619464	0.401718	-1.74505	0.192574	-0.281491	1.20306	1.55087	-0.889437	5.30791	5.26742	4.34061	5.20747	0.0805366	0.236988	0.0005235	0.424122	0.319861	0.587926	0.32502	5.45424	0	1	0	0	0	0	0	0	0	NaN	NaN	NaN	NaN	NaN	NaN	NaN	NaN	NaN	NaN	NaN	NaN	NaN	NaN	NaN
639	Chr1	TAIR10	23017001	23018000	0	0.218285	-0.00196783	-1.76639	-0.32406	-0.555866	0.425854	0.325188	-1.24478	6.71262	6.28788	5.91132	6.5928	0.274335	0.499986	4.24802e-10	0.147982	0.321245	1.00595	0.173341	0.264038	0	1	0	0	0	0	0	0	0	AT1G62300	0	Chr1	23016683	23019279	-	0	protein_coding	WRKY family transcription factor	Encodes a transcription factor WRKY6. Regulates Phosphate1 (Pho1) expression in response to low phosphate (Pi) stress.	WRKY6; CONTAINS InterPro DOMAIN/s: DNA-binding WRKY (InterPro:IPR003657); BEST Arabidopsis thaliana protein match is: WRKY family transcription factor (TAIR:AT4G04450.1); Has 3824 Blast hits to 3363 proteins in 295 species: Archae - 0; Bacteria - 33; Metazoa - 119; Fungi - 43; Plants - 3509; Viruses - 0; Other Eukaryotes - 120 (source: NCBI BLink).	0.0627951	0.908128	1.35449	7.53971e-07
1602	Chr3	TAIR10	6002001	6003000	0	-1.34783	-0.26978	-1.08559	-1.08353	-0.926064	-0.692456	-0.00546393	-2.07133	5.68066	5.72438	5.66165	5.61322	0.0304621	0.350362	0.000662409	0.000501621	0.321531	0.967326	0.312444	0.0784341	0	1	0	0	0	0	0	0	0	AT3G17540	0	Chr3	6002783	6003973	+	NaN	protein_coding	F-box and associated interaction domains-containing protein	---	F-box and associated interaction domains-containing protein; CONTAINS InterPro DOMAIN/s: F-box domain, cyclin-like (InterPro:IPR001810), F-box domain, Skp2-like (InterPro:IPR022364), F-box associated domain, type 1 (InterPro:IPR006527), F-box associated interaction domain (InterPro:IPR017451); BEST Arabidopsis thaliana protein match is: F-box and associated interaction domains-containing protein …	0	1	0	1
3165	Chr5	TAIR10	22853001	22854000	0	0.199506	0.0192052	-1.42771	-1.04819	-1.07057	0.389895	0.545368	-2.49957	5.56263	5.42995	4.95083	5.06289	0.398877	0.499046	0.000453373	0.00606448	0.321928	0.928676	0.273066	0.0105769	0	1	0	0	0	0	0	0	0	AT5G56430	0	Chr5	22853323	22854575	-	NaN	protein_coding	F-box/FBD-like domains containing protein	---	F-box/FBD-like domains containing protein; FUNCTIONS IN: molecular_function unknown; INVOLVED IN: biological_process unknown; LOCATED IN: endomembrane system; CONTAINS InterPro DOMAIN/s: FBD (InterPro:IPR013596), F-box domain, cyclin-like (InterPro:IPR001810), F-box domain, Skp2-like (InterPro:IPR022364), FBD-like (InterPro:IPR006566), Leucine-rich repeat 2 (InterPro:IPR013101); BEST Arabidopsis …	0	1	0	1
2845	Chr5	TAIR10	10139001	10140000	0	0.338153	0.196828	-1.48945	-0.905593	-0.681311	0.661646	0.258153	-1.56519	5.69223	5.56466	4.98051	5.1959	0.245786	0.401164	0.000208154	0.0135113	0.322913	0.134196	0.0248121	0.141512	0	0	0	0	0	0	0	0	0	AT5G28160	0	Chr5	10137926	10139013	+	NaN	protein_coding	Galactose oxidase/kelch repeat superfamily protein	---	Galactose oxidase/kelch repeat superfamily protein; CONTAINS InterPro DOMAIN/s: F-box domain, cyclin-like (InterPro:IPR001810), Galactose oxidase/kelch, beta-propeller (InterPro:IPR011043), Kelch repeat type 1 (InterPro:IPR006652), Kelch related (InterPro:IPR013089), Kelch-type beta propeller (InterPro:IPR015915); BEST Arabidopsis thaliana protein match is: Galactose oxidase/kelch repeat superfam…	0	1	0	1
1647	Chr3	TAIR10	7313001	7314000	0	0.317037	-0.236949	-1.46113	-0.789562	-0.923352	0.621084	0.323276	-1.6905	6.15801	5.72498	5.46325	5.74164	0.211137	0.379991	1.42281e-05	0.00909537	0.323412	6.34261	0.072825	0.078198	0	1	0	0	1	0	0	0	0	AT3G20880	0	Chr3	7313538	7315883	-	NaN	protein_coding	WIP domain protein 4	---	WIP domain protein 4 (WIP4); FUNCTIONS IN: sequence-specific DNA binding transcription factor activity, zinc ion binding, nucleic acid binding; INVOLVED IN: regulation of transcription; LOCATED IN: nucleus; EXPRESSED IN: central root cap of the primary root, quiescent center; EXPRESSED DURING: seedling growth; CONTAINS InterPro DOMAIN/s: Zinc finger, C2H2-like (InterPro:IPR015880), Zinc finger, C…	0	1	0	1
2831	Chr5	TAIR10	9128001	9129000	0	0.677812	0.458764	-1.47669	-0.000828886	0.0164401	1.32815	1.48112	-1.17415	5.98985	5.79292	5.1125	5.77913	0.0149913	0.123105	0.00011424	0.499998	0.323879	0.526476	0.114215	0.980568	1	0	0	0	0	0	0	0	0	AT5G26130	0	Chr5	9128110	9128610	-	NaN	protein_coding	CAP (Cysteine-rich secretory proteins, Antigen 5, and Pathogenesis-related 1 protein) superfamily protein	---	CAP (Cysteine-rich secretory proteins, Antigen 5, and Pathogenesis-related 1 protein) superfamily protein; FUNCTIONS IN: molecular_function unknown; INVOLVED IN: biological_process unknown; LOCATED IN: endomembrane system, extracellular region; EXPRESSED IN: root, leaf; EXPRESSED DURING: LP.04 four leaves visible; CONTAINS InterPro DOMAIN/s: Allergen V5/Tpx-1 related, conserved site (InterPro:IPR…	0	1	0	1
2828	Chr5	TAIR10	9111001	9112000	0	0.462913	0.174466	-1.25314	-0.26042	-0.369509	0.910361	0.66954	-1.22462	6.8881	6.41645	6.21043	6.67906	0.0237095	0.365885	1.22551e-06	0.216999	0.325352	0.585189	0.0115194	0.173727	0	1	0	0	0	0	0	0	0	AT5G26090	0	Chr5	9109026	9113235	-	NaN	protein_coding	Plant self-incompatibility protein S1 family	---	Plant self-incompatibility protein S1 family; CONTAINS InterPro DOMAIN/s: Plant self-incompatibility S1 (InterPro:IPR010264); BEST Arabidopsis thaliana protein match is: Plant self-incompatibility protein S1 family (TAIR:AT5G11830.1); Has 1807 Blast hits to 1807 proteins in 277 species: Archae - 0; Bacteria - 0; Metazoa - 736; Fungi - 347; Plants - 385; Viruses - 0; Other Eukaryotes - 339 (source…	0.765535	0.247789	0	1
3084	Chr5	TAIR10	20646001	20647000	0	-2.38574	-0.334069	-1.94312	-1.06959	-0.668211	-1.21181	0.00714396	-2.11965	4.65888	5.1158	4.49862	4.83967	0.00665501	0.349657	3.74277e-05	0.00976629	0.326496	1.05013	0.0434718	0.231234	1	1	0	0	0	0	0	0	0	AT5G50770	0	Chr5	20646680	20648725	-	1	protein_coding	hydroxysteroid dehydrogenase 6	Encodes a putative hydroxysteroid dehydrogenase (HSD). Genes that encode HSD include: At5g50600 and At5g50700 (HSD1), At3g47350(HSD2), At3g47360(HSD3), At5g50590 and At5g50690(HSD4), At5g50770(HSD6) (Plant Cell Physiology 50:1463). Two copies of HSD1 and HSD4 exist due to a gene duplication event. In Plant Physiology 145:87, At5g50690 is HSD7, At4g10020 is HSD5.	hydroxysteroid dehydrogenase 6 (HSD6); FUNCTIONS IN: oxidoreductase activity, binding, catalytic activity; INVOLVED IN: oxidation reduction, metabolic process; LOCATED IN: endomembrane system; EXPRESSED IN: 12 plant structures; EXPRESSED DURING: 8 growth stages; CONTAINS InterPro DOMAIN/s: Short-chain dehydrogenase/reductase, conserved site (InterPro:IPR020904), NAD(P)-binding domain (InterPro:IP…	4.70044	7.40276e-08	1.40439	0.0188625
1742	Chr3	TAIR10	9418001	9419000	0	-0.938969	0.580561	-0.299433	-2.24763	0.403163	-0.47605	-1.38023	-2.78141	4.5223	5.17325	4.79814	3.74047	0.272112	0.116022	0.379021	0.000144744	0.32761	2.45815	0.806139	1.43872	1	0	0	0	0	0	0	0	0	AT3G25795	0	Chr3	9417551	9418705	-	2	other_rna	other RNA	Encodes a trans-acting siRNA that is phosphate starvation-upregulated and activated by PAP1 (MYB75).	---	-1.49476	0.00288725	-0.253757	0.68694
2702	Chr5	TAIR10	5714001	5715000	0	0.232865	0.819443	-1.85971	-0.828152	-1.14388	0.461902	1.0284	-1.87731	5.43849	5.72286	4.60445	5.02872	0.376965	0.00706041	4.30097e-05	0.0339624	0.328714	0.11296	0.00471293	0.160264	0	1	0	0	0	0	0	0	0	AT5G17330	0	Chr5	5711012	5715075	+	NaN	protein_coding	glutamate decarboxylase	Encodes one of two isoforms of glutamate decarboxylase.	glutamate decarboxylase (GAD); FUNCTIONS IN: calmodulin binding, glutamate decarboxylase activity; INVOLVED IN: response to cadmium ion; EXPRESSED IN: 13 plant structures; EXPRESSED DURING: 6 growth stages; CONTAINS InterPro DOMAIN/s: Pyridoxal phosphate-dependent transferase, major domain (InterPro:IPR015424), Pyridoxal phosphate-dependent decarboxylase (InterPro:IPR002129), Glutamate decarboxyl…	-0.537266	0.62674	0.36257	0.462917
1594	Chr3	TAIR10	5848001	5849000	0	-0.587403	-0.59215	-1.98684	-1.61616	-0.4828	-0.29493	0.271101	-1.20416	5.04331	4.95301	4.41344	4.49968	0.355296	0.183239	4.28482e-05	0.00040989	0.33223	2.7057	0.245429	0.540477	0	0	0	0	0	0	0	0	0	AT3G17152	0	Chr3	5848787	5849614	+	NaN	protein_coding	Plant invertase/pectin methylesterase inhibitor superfamily protein	---	Plant invertase/pectin methylesterase inhibitor superfamily protein; FUNCTIONS IN: enzyme inhibitor activity, pectinesterase activity; INVOLVED IN: biological_process unknown; LOCATED IN: endomembrane system; CONTAINS InterPro DOMAIN/s: Pectinesterase inhibitor (InterPro:IPR006501); BEST Arabidopsis thaliana protein match is: Plant invertase/pectin methylesterase inhibitor superfamily protein (TA…	0.263034	0.831812	0.263034	0.831812
728	Chr1	TAIR10	24700001	24701000	0	0.310166	0.31455	-1.99112	-1.07654	-0.249291	0.620529	-0.00742814	-3.6277	6.20593	6.02528	5.25902	5.65073	0.213066	0.230574	2.28493e-08	0.000458099	0.332759	1.04159	0.291372	0.62489	0	1	0	0	0	0	0	0	0	AT1G66270	0	Chr1	24699990	24703041	-	NaN	protein_coding	Glycosyl hydrolase superfamily protein	BGLU21 encodes a beta-glucosidase that has a high level of activity against the naturally occuring secondary metabolite scopolin. Recombinant BGLU21 produced in insect cells shows lower levels of activity using the structurally similar substrates esculin (33%) and 4-MU-glucoside (9%). BGLU21 is glycosylated in planta and has a C-terminal ER retention signal. Transcript analysis as well as protein…	BGLU21; FUNCTIONS IN: beta-glucosidase activity, hydrolase activity, hydrolyzing O-glycosyl compounds; INVOLVED IN: cellular response to phosphate starvation, response to salt stress, cellular response to cold, cellular response to salt stress, response to osmotic stress; LOCATED IN: vacuole, membrane; EXPRESSED IN: root, callus, leaf; EXPRESSED DURING: seedling growth; CONTAINS InterPro DOMAIN/s…	0	1	0	1
3201	Chr5	TAIR10	24241001	24242000	0	0.414172	0.631216	-1.06057	-0.295246	-0.541125	0.206119	0.429955	-1.71642	6.45573	6.3342	5.9012	6.2439	0.0819476	0.0105193	0.000285891	0.226124	0.334335	0.189302	0.236343	0.294689	1	1	1	0	0	0	0	0	0	AT5G60200	0	Chr5	24240975	24242523	+	NaN	protein_coding	TARGET OF MONOPTEROS 6	Encodes a Dof-type transcription factor.	TARGET OF MONOPTEROS 6 (TMO6); CONTAINS InterPro DOMAIN/s: Zinc finger, Dof-type (InterPro:IPR003851); BEST Arabidopsis thaliana protein match is: Dof-type zinc finger DNA-binding family protein (TAIR:AT3G45610.1); Has 30201 Blast hits to 17322 proteins in 780 species: Archae - 12; Bacteria - 1396; Metazoa - 17338; Fungi - 3422; Plants - 5037; Viruses - 0; Other Eukaryotes - 2996 (source: NCBI BL…	-0.0050239	0.994025	-0.265377	0.341801
1384	Chr2	TAIR10	17988001	17989000	0	-0.0815897	-0.784651	-1.29446	-0.909896	-1.15579	-0.0411873	0.231287	-1.03952	5.94235	5.45678	5.50719	5.64385	0.493892	0.0410739	0.000105149	0.0034619	0.334521	1.84259	0.109323	0.119153	1	1	0	0	0	0	0	0	0	AT2G43270	0	Chr2	17988207	17989491	-	NaN	protein_coding	F-box and associated interaction domains-containing protein	---	F-box and associated interaction domains-containing protein; CONTAINS InterPro DOMAIN/s: F-box domain, cyclin-like (InterPro:IPR001810), F-box domain, Skp2-like (InterPro:IPR022364), F-box associated interaction domain (InterPro:IPR017451); BEST Arabidopsis thaliana protein match is: F-box and associated interaction domains-containing protein (TAIR:AT2G43445.1); Has 749 Blast hits to 743 proteins…	0.485427	0.541256	0.137504	1
2974	Chr5	TAIR10	17345001	17346000	0	-0.503746	0.112484	-2.14949	-1.08426	-1.03426	-1.01377	0.140073	-3.38649	5.10662	5.30124	4.377	4.80904	0.384546	0.470918	1.13116e-05	0.00953675	0.336536	0.108383	0.223528	0.0236216	0	1	0	0	0	0	0	0	0	NaN	NaN	NaN	NaN	NaN	NaN	NaN	NaN	NaN	NaN	NaN	NaN	NaN	NaN	NaN
2848	Chr5	TAIR10	10285001	10286000	0	0.228909	-0.0900942	-1.46315	-0.821769	-1.01739	0.466141	0.695345	-1.19248	5.82035	5.56586	5.17313	5.42492	0.350361	0.482544	9.35321e-05	0.0153279	0.340338	1.29343	0.101997	0.106479	0	0	0	0	0	0	0	0	0	NaN	NaN	NaN	NaN	NaN	NaN	NaN	NaN	NaN	NaN	NaN	NaN	NaN	NaN	NaN
1258	Chr2	TAIR10	13782001	13783000	0	0.278357	-0.0359438	-1.49602	-0.796163	-1.28769	0.5675	0.761928	-1.73322	5.66233	5.45048	4.97735	5.25062	0.312085	0.497396	0.000197656	0.0275438	0.341028	1.096	0.0735006	0.236099	0	1	0	0	0	0	0	0	0	AT2G32460	0	Chr2	13782208	13784471	-	NaN	protein_coding	myb domain protein 101	Member of the R2R3 factor gene family.	myb domain protein 101 (MYB101); CONTAINS InterPro DOMAIN/s: SANT, DNA-binding (InterPro:IPR001005), Homeodomain-like (InterPro:IPR009057), Myb, DNA-binding (InterPro:IPR014778), HTH transcriptional regulator, Myb-type, DNA-binding (InterPro:IPR017930), Homeodomain-related (InterPro:IPR012287), Myb transcription factor (InterPro:IPR015495); BEST Arabidopsis thaliana protein match is: myb domain p…	0.847997	0.184933	0	1
2929	Chr5	TAIR10	16099001	16100000	0	-1.17217	-0.751374	-0.790202	-1.31424	-0.745809	-0.573666	-0.811772	-2.39155	5.98298	5.70988	6.05815	5.76243	0.0367802	0.0325701	0.00492269	6.38586e-06	0.343213	0.0386881	0.503607	0.276201	2	1	0	0	0	0	0	0	0	AT5G40275	0	Chr5	16098190	16100051	-	NaN	other_rna	other RNA	---	---	0	1	0	1
2410	Chr4	TAIR10	14687001	14688000	0	0.323604	-0.320471	-2.85355	-0.179881	-0.663693	0.157135	0.358704	-1.79129	5.32056	5.04825	3.96582	5.18566	0.302462	0.365231	3.18516e-07	0.43405	0.344842	16.8812	0.228794	0.57489	0	0	0	0	0	0	0	0	0	AT4G30050	0	Chr4	14687029	14687776	-	NaN	protein_coding	---	---	unknown protein; FUNCTIONS IN: molecular_function unknown; INVOLVED IN: biological_process unknown; LOCATED IN: endomembrane system; EXPRESSED IN: leaf whorl, sepal, flower; EXPRESSED DURING: petal differentiation and expansion stage; Has 6 Blast hits to 6 proteins in 2 species: Archae - 0; Bacteria - 0; Metazoa - 0; Fungi - 0; Plants - 6; Viruses - 0; Other Eukaryotes - 0 (source: NCBI BLink).	0	1	0	1
2548	Chr5	TAIR10	1482001	1483000	0	0.062961	-0.370213	-0.597001	-1.21651	-0.160229	0.130655	-0.620177	-2.50823	5.75238	5.45442	5.60432	5.24291	0.48733	0.286913	0.0728989	0.000594835	0.346054	0.252901	0.615884	0.76835	0	1	0	0	0	0	0	0	0	AT5G05020	-366	Chr5	1480772	1481636	-	NaN	protein_coding	Pollen Ole e 1 allergen and extensin family protein	---	Pollen Ole e 1 allergen and extensin family protein; LOCATED IN: endomembrane system; CONTAINS InterPro DOMAIN/s: Pollen Ole e 1 allergen/extensin (InterPro:IPR006041); BEST Arabidopsis thaliana protein match is: Pollen Ole e 1 allergen and extensin family protein (TAIR:AT2G41390.1); Has 1807 Blast hits to 1807 proteins in 277 species: Archae - 0; Bacteria - 0; Metazoa - 736; Fungi - 347; Plants …	0.485427	0.541256	0	1
349	Chr1	TAIR10	11318001	11319000	0	0.394891	0.333757	-1.50292	-0.848398	-0.840594	0.814649	0.753253	-1.03342	6.02315	5.86347	5.272	5.53428	0.147889	0.229434	3.06301e-05	0.00909384	0.346466	0.385208	0.185253	0.00462646	0	1	0	0	0	0	0	0	0	AT1G31630	0	Chr1	11318528	11319547	-	NaN	protein_coding	AGAMOUS-like 86	---	AGAMOUS-like 86 (AGL86); FUNCTIONS IN: DNA binding, sequence-specific DNA binding transcription factor activity; INVOLVED IN: regulation of transcription, DNA-dependent; LOCATED IN: nucleus; EXPRESSED IN: antipodal cell, endosperm; CONTAINS InterPro DOMAIN/s: Transcription factor, MADS-box (InterPro:IPR002100); BEST Arabidopsis thaliana protein match is: AGAMOUS-like 92 (TAIR:AT1G31640.1); Has 38…	0	1	0	1
872	Chr1	TAIR10	28433001	28434000	0	0.321099	0.0339899	-1.56783	-2.54005	-0.351477	0.154901	-0.138714	-1.82437	4.43934	4.53585	3.71733	3.10459	0.382192	0.498393	0.0137444	0.000606797	0.347695	1.68124	0.0756711	0.757415	0	2	0	0	0	0	0	0	0	AT1G75717	0	Chr1	28433919	28434261	+	NaN	protein_coding	---	---	unknown protein; FUNCTIONS IN: molecular_function unknown; INVOLVED IN: biological_process unknown; LOCATED IN: cellular_component unknown; Has 30201 Blast hits to 17322 proteins in 780 species: Archae - 12; Bacteria - 1396; Metazoa - 17338; Fungi - 3422; Plants - 5037; Viruses - 0; Other Eukaryotes - 2996 (source: NCBI BLink).	0	1	0	1
965	Chr2	TAIR10	1237001	1238000	0	0.502961	0.16074	-1.66218	-0.086952	-0.242605	1.0461	0.770342	-2.09963	6.23793	5.89934	5.35374	6.07959	0.0504646	0.415456	1.75159e-06	0.470216	0.350171	0.653321	0.116349	0.475193	0	1	0	0	0	0	0	0	0	AT2G03955	-677	Chr2	1238677	1239071	+	NaN	protein_coding	Cysteine-rich protein	Encodes a defensin-like (DEFL) family protein.	Cysteine-rich protein; LOCATED IN: endomembrane system; BEST Arabidopsis thaliana protein match is: Cysteine-rich protein (TAIR:AT2G03933.1); Has 35333 Blast hits to 34131 proteins in 2444 species: Archae - 798; Bacteria - 22429; Metazoa - 974; Fungi - 991; Plants - 531; Viruses - 0; Other Eukaryotes - 9610 (source: NCBI BLink).	0	1	0	1
2198	Chr4	TAIR10	7897001	7898000	0	0.542319	-0.401842	-1.94141	-0.389727	0.0169266	0.260425	-0.702971	-4.0455	5.22601	4.85732	4.20353	4.87196	0.133276	0.324408	0.000219933	0.293064	0.35029	0.273055	0.351565	1.09669	0	1	0	0	0	0	0	0	0	NaN	NaN	NaN	NaN	NaN	NaN	NaN	NaN	NaN	NaN	NaN	NaN	NaN	NaN	NaN
1844	Chr3	TAIR10	16126001	16127000	0	0.442934	0.26581	-3.00476	-0.741494	-0.243479	0.924135	1.20269	-2.21474	5.46543	5.38659	3.97704	4.9921	0.176517	0.350577	5.77314e-08	0.0611145	0.35148	0.637117	0.151417	0.506642	0	0	0	0	0	0	0	0	0	AT3G44540	0	Chr3	16124021	16127954	+	NaN	protein_coding	fatty acid reductase 4	Encodes a member of the eight-member gene family encoding alcohol-forming fatty acyl-CoA reductases (FARs) identified in Arabidopsis thaliana. Three of the FARs, FAR1 (At5g22500), FAR4 (At3g44540) and FAR5 (At3g44550), are shown to generate the fatty alcohols found in root, seed coat, and wound-induced leaf tissue.	fatty acid reductase 4 (FAR4); CONTAINS InterPro DOMAIN/s: NAD(P)-binding domain (InterPro:IPR016040), Male sterility (InterPro:IPR004262), Male sterility, NAD-binding (InterPro:IPR013120); BEST Arabidopsis thaliana protein match is: fatty acid reductase 1 (TAIR:AT5G22500.1); Has 1944 Blast hits to 1910 proteins in 300 species: Archae - 2; Bacteria - 305; Metazoa - 993; Fungi - 183; Plants - 285;…	-0.106915	1	-0.222392	0.845019
133	Chr1	TAIR10	4555001	4556000	0	-0.470608	-0.028711	-2.49894	-2.62214	-0.371318	-0.225893	-1.22532	-4.89109	4.86763	5.04414	3.96546	3.78691	0.411765	0.498745	9.25611e-06	5.103e-06	0.352361	0.955734	0.323788	0.752417	0	0	0	0	1	0	0	0	0	AT1G13300	-892	Chr1	4556892	4558708	+	NaN	protein_coding	myb-like transcription factor family protein	Overexpression confers hypersensitivity to low phosphate-elicited inhibition of primary root growth.	HYPERSENSITIVITY TO LOW PI-ELICITED PRIMARY ROOT SHORTENING 1 (HRS1); CONTAINS InterPro DOMAIN/s: Homeodomain-like (InterPro:IPR009057), Myb, DNA-binding (InterPro:IPR014778), HTH transcriptional regulator, Myb-type, DNA-binding (InterPro:IPR017930), Myb-like DNA-binding domain, SHAQKYF class (InterPro:IPR006447), Homeodomain-related (InterPro:IPR012287); BEST Arabidopsis thaliana protein match i…	0.0614005	1	0.868755	0.162991
975	Chr2	TAIR10	1687001	1688000	0	0.504653	0.125255	-2.04523	-2.04807	-1.20593	1.05791	1.01026	-3.77189	5.43077	5.26643	4.37383	4.27172	0.133635	0.465018	3.19807e-05	2.87671e-05	0.353616	0.778015	0.296926	0.25896	0	1	0	0	0	0	0	0	0	AT2G04800	0	Chr2	1687196	1687817	-	NaN	protein_coding	---	---	unknown protein; FUNCTIONS IN: molecular_function unknown; INVOLVED IN: N-terminal protein myristoylation; LOCATED IN: cellular_component unknown; EXPRESSED IN: hypocotyl, root; Has 4 Blast hits to 4 proteins in 1 species: Archae - 0; Bacteria - 0; Metazoa - 0; Fungi - 0; Plants - 4; Viruses - 0; Other Eukaryotes - 0 (source: NCBI BLink).	-1	0.0435585	1	0.192444
1677	Chr3	TAIR10	7728001	7729000	0	0.161668	0.102182	-1.87851	0.00551898	-0.467795	0.340041	0.293456	-2.86944	5.72558	5.60991	4.91321	5.77596	0.423474	0.470295	3.63633e-06	0.4999	0.35412	0.481025	0.208795	1.02833	0	0	0	0	0	0	0	0	0	AT3G21940	-806	Chr3	7729806	7731171	+	NaN	protein_coding	Receptor protein kinase-related	---	Receptor protein kinase-related; FUNCTIONS IN: molecular_function unknown; INVOLVED IN: biological_process unknown; LOCATED IN: endomembrane system; CONTAINS InterPro DOMAIN/s: Protein of unknown function DUF26 (InterPro:IPR002902); BEST Arabidopsis thaliana protein match is: Receptor-like protein kinase-related family protein (TAIR:AT3G21960.2); Has 1304 Blast hits to 1267 proteins in 21 species…	0	1	0	1
1890	Chr3	TAIR10	17539001	17540000	0	0.269565	-0.429576	-1.23823	-1.66509	-1.92262	0.571426	0.188507	-2.33403	5.87057	5.43972	5.3107	5.03387	0.300049	0.238496	0.000579343	8.99756e-06	0.358084	2.58538	0.306924	0.071822	0	1	0	0	1	0	0	0	0	AT3G47600	0	Chr3	17539338	17541230	-	NaN	protein_coding	myb domain protein 94	Encodes a putative transcription factor (MYB94).	myb domain protein 94 (MYB94); CONTAINS InterPro DOMAIN/s: SANT, DNA-binding (InterPro:IPR001005), Homeodomain-like (InterPro:IPR009057), Myb, DNA-binding (InterPro:IPR014778), HTH transcriptional regulator, Myb-type, DNA-binding (InterPro:IPR017930), Homeodomain-related (InterPro:IPR012287), Myb transcription factor (InterPro:IPR015495); BEST Arabidopsis thaliana protein match is: myb domain pro…	-0.0215734	0.970939	-0.0215734	0.950954
2827	Chr5	TAIR10	9106001	9107000	0	0.383623	0.00267704	-2.72546	-0.687244	-0.62441	0.817592	1.25758	-2.20581	5.09789	4.99777	3.77855	4.67326	0.272937	0.499986	5.52623e-06	0.117577	0.360674	0.994174	0.105421	0.0479773	1	0	0	0	0	0	0	0	0	AT5G26070	0	Chr5	9106341	9106649	+	NaN	protein_coding	hydroxyproline-rich glycoprotein family protein	Encodes a protein with 23.5% proline residues and proline-rich extensin domains, INTERPRO:IPR002965; similar to root nodule extensin (Pisum sativum) gi:15021750/gb:AAK77902; Common family members: At5g19800, At5g57070, At1g72790 (Arabidopsis thaliana)	hydroxyproline-rich glycoprotein family protein; FUNCTIONS IN: molecular_function unknown; INVOLVED IN: biological_process unknown; LOCATED IN: endomembrane system; BEST Arabidopsis thaliana protein match is: proline-rich family protein (TAIR:AT5G26080.1); Has 1807 Blast hits to 1807 proteins in 277 species: Archae - 0; Bacteria - 0; Metazoa - 736; Fungi - 347; Plants - 385; Viruses - 0; Other Eu…	0	1	0	1
1467	Chr3	TAIR10	669001	670000	0	-1.02888	-0.491906	-1.19273	-0.824656	-0.582678	-0.482886	-0.40871	-1.78397	5.75265	5.62105	5.60251	5.73472	0.0900811	0.166326	0.000231343	0.00645283	0.36164	0.0925823	0.198757	0.172186	0	0	0	0	0	0	0	0	0	AT3G02970	0	Chr3	669103	670541	-	NaN	protein_coding	EXORDIUM like 6	---	EXORDIUM like 6 (EXL6); FUNCTIONS IN: molecular_function unknown; INVOLVED IN: biological_process unknown; LOCATED IN: endomembrane system; EXPRESSED IN: 12 plant structures; EXPRESSED DURING: 6 growth stages; CONTAINS InterPro DOMAIN/s: Phosphate-induced protein 1 (InterPro:IPR006766); BEST Arabidopsis thaliana protein match is: Phosphate-responsive 1 family protein (TAIR:AT1G35140.1); Has 398 B…	0.137504	1	0.137504	1
2336	Chr4	TAIR10	12234001	12235000	0	-1.63437	-0.736395	-0.279424	-1.66466	-0.123506	-0.763099	-2.18423	-3.58604	4.94243	5.01221	5.39273	4.64013	0.0424389	0.0991971	0.347351	0.000122818	0.363716	0.496067	0.855868	0.862828	0	0	0	0	0	0	0	0	0	AT4G23432	-527	Chr4	12233194	12233475	-	NaN	protein_coding	---	This gene encodes a small protein and has either evidence of transcription or purifying selection.	unknown protein; Has 30201 Blast hits to 17322 proteins in 780 species: Archae - 12; Bacteria - 1396; Metazoa - 17338; Fungi - 3422; Plants - 5037; Viruses - 0; Other Eukaryotes - 2996 (source: NCBI BLink).	0	1	0	1
1754	Chr3	TAIR10	9926001	9927000	0	-2.99247	-0.136336	-1.33666	-1.33746	-0.988473	-1.39553	-0.0879418	-2.20518	5.93089	6.28645	6.1923	6.16344	3.69596e-08	0.437254	2.48039e-07	1.01516e-07	0.364099	0.217718	0.245357	0.150171	0	1	0	0	0	0	0	0	0	AT3G26930	0	Chr3	9925754	9927393	+	NaN	protein_coding	Protein with RNI-like/FBD-like domains	---	Protein with RNI-like/FBD-like domains; CONTAINS InterPro DOMAIN/s: FBD (InterPro:IPR013596), FBD-like (InterPro:IPR006566), Leucine-rich repeat 2 (InterPro:IPR013101); BEST Arabidopsis thaliana protein match is: Protein with RNI-like/FBD-like domains (TAIR:AT4G13965.1); Has 974 Blast hits to 953 proteins in 26 species: Archae - 0; Bacteria - 8; Metazoa - 17; Fungi - 0; Plants - 945; Viruses - 0;…	1.14439	0.195278	0.559427	0.24296
2759	Chr5	TAIR10	7432001	7433000	0	0.241751	-0.424396	-2.52894	-0.375036	0.0847941	0.521012	0.0637646	-2.54099	5.0801	4.85076	3.92538	4.88378	0.394314	0.309286	9.63052e-06	0.303637	0.36516	1.36118	0.00237787	1.59529	0	0	0	1	1	1	1	1	0	AT5G22420	0	Chr5	7429903	7432586	+	NaN	protein_coding	fatty acid reductase 7	---	fatty acid reductase 7 (FAR7); FUNCTIONS IN: oxidoreductase activity, acting on the CH-CH group of donors, binding, catalytic activity; INVOLVED IN: microsporogenesis, metabolic process; LOCATED IN: cellular_component unknown; EXPRESSED IN: petal, embryo, sepal, flower, stamen; EXPRESSED DURING: 4 anthesis, C globular stage, petal differentiation and expansion stage; CONTAINS InterPro DOMAIN/s: M…	0	1	0	1
2536	Chr5	TAIR10	1022001	1023000	0	0.346793	-0.360836	-0.224819	-1.62752	-0.711699	0.160698	-0.572298	-2.62722	5.23071	4.95332	5.12973	4.35797	0.29067	0.344394	0.410795	0.00072746	0.365258	0.227101	0.842936	0.391843	1	1	0	1	1	0	1	1	0	NaN	NaN	NaN	NaN	NaN	NaN	NaN	NaN	NaN	NaN	NaN	NaN	NaN	NaN	NaN
3172	Chr5	TAIR10	23133001	23134000	0	-1.50842	-0.518042	-0.659723	-1.31155	-0.0943426	-0.698708	-1.60473	-3.69975	5.08577	5.19314	5.32005	4.93121	0.0491143	0.201783	0.0725097	0.000911393	0.367196	0.512402	0.697658	0.867023	0	0	0	1	1	0	0	1	0	NaN	NaN	NaN	NaN	NaN	NaN	NaN	NaN	NaN	NaN	NaN	NaN	NaN	NaN	NaN
3209	Chr5	TAIR10	24466001	24467000	0	-1.64448	-0.713595	-1.11028	-2.37813	-0.105044	-0.761368	-1.01255	-2.8863	4.87041	4.96931	4.92485	4.21224	0.046481	0.114461	0.00780881	1.58339e-06	0.367374	0.173391	0.444607	0.916134	0	0	0	0	0	0	0	0	0	AT5G60810	0	Chr5	24466531	24467179	-	NaN	protein_coding	root meristem growth factor 1	Encodes a root meristem growth factor (RGF). Belongs to a family of functionally redundant homologous peptides that are secreted, tyrosine-sulfated, and expressed mainly in the stem cell area and the innermost layer of central columella cells. RGFs are required for maintenance of the root stem cell niche and transit amplifying cell proliferation. Members of this family include: At5g60810 (RGF1), …	root meristem growth factor 1 (RGF1); FUNCTIONS IN: molecular_function unknown; INVOLVED IN: regulation of root meristem growth, positive regulation of gene expression; LOCATED IN: endomembrane system; EXPRESSED IN: columella root cap initial cell, quiescent center; Has 4 Blast hits to 4 proteins in 2 species: Archae - 0; Bacteria - 0; Metazoa - 0; Fungi - 0; Plants - 4; Viruses - 0; Other Eukary…	0	1	0	1
1257	Chr2	TAIR10	13767001	13768000	0	-0.642287	-1.04901	-0.201395	-1.29996	0.464201	-0.297607	-1.62659	-2.43569	5.41789	5.04826	5.65424	5.05535	0.294424	0.0172688	0.398524	0.000583631	0.367505	0.216033	0.847902	2.11591	0	0	0	0	1	0	0	0	0	NaN	NaN	NaN	NaN	NaN	NaN	NaN	NaN	NaN	NaN	NaN	NaN	NaN	NaN	NaN
2911	Chr5	TAIR10	15434001	15435000	0	-0.790314	-0.862427	-0.995472	-1.12604	-0.875377	-0.36482	-0.266308	-1.56062	5.63096	5.32049	5.51876	5.39836	0.197387	0.0320554	0.00321677	0.000809883	0.368989	0.529067	0.221271	0.125368	0	0	0	0	0	0	0	0	0	AT5G38550	0	Chr5	15432781	15435779	-	NaN	protein_coding	Mannose-binding lectin superfamily protein	---	Mannose-binding lectin superfamily protein; CONTAINS InterPro DOMAIN/s: Mannose-binding lectin (InterPro:IPR001229); BEST Arabidopsis thaliana protein match is: Mannose-binding lectin superfamily protein (TAIR:AT5G38540.1); Has 1807 Blast hits to 1807 proteins in 277 species: Archae - 0; Bacteria - 0; Metazoa - 736; Fungi - 347; Plants - 385; Viruses - 0; Other Eukaryotes - 339 (source: NCBI BLin…	0.906891	0.113086	0.392317	0.511376
666	Chr1	TAIR10	23434001	23435000	0	0.329481	0.210838	-1.61232	-0.073057	-0.232622	0.720618	0.659311	-2.52955	5.76236	5.62836	4.99478	5.68842	0.246368	0.383942	4.97803e-05	0.48374	0.371768	0.514216	0.221559	0.52544	0	1	0	0	0	0	0	0	0	AT1G63200	0	Chr1	23433630	23434600	-	1	protein_coding	Cystatin/monellin superfamily protein	---	Cystatin/monellin superfamily protein; CONTAINS InterPro DOMAIN/s: Cystatin-related, plant (InterPro:IPR006525); BEST Arabidopsis thaliana protein match is: Cystatin/monellin superfamily protein (TAIR:AT1G63190.1); Has 85 Blast hits to 83 proteins in 2 species: Archae - 0; Bacteria - 0; Metazoa - 0; Fungi - 0; Plants - 85; Viruses - 0; Other Eukaryotes - 0 (source: NCBI BLink).	0	1	0.137504	1
805	Chr1	TAIR10	26198001	26199000	0	0.151389	0.12733	-1.62914	-1.19322	-0.780147	0.332168	-0.357493	-3.64983	5.7543	5.64826	5.06645	5.21126	0.43096	0.453475	2.54015e-05	0.000883963	0.372314	2.1249	0.382927	0.209537	0	0	0	0	0	0	0	0	0	AT1G69650	0	Chr1	26197498	26198821	-	NaN	protein_coding	TRAF-like family protein	---	TRAF-like family protein; FUNCTIONS IN: molecular_function unknown; INVOLVED IN: N-terminal protein myristoylation; LOCATED IN: vacuole; CONTAINS InterPro DOMAIN/s: TRAF-like (InterPro:IPR008974), MATH (InterPro:IPR002083); BEST Arabidopsis thaliana protein match is: TRAF-like family protein (TAIR:AT1G69660.1); Has 587 Blast hits to 575 proteins in 46 species: Archae - 0; Bacteria - 0; Metazoa - …	0	1	0	1
687	Chr1	TAIR10	23989001	23990000	0	-0.69176	-0.288167	-0.930993	-1.03358	-0.640601	-0.315684	-0.0887829	-1.71701	5.9106	5.7665	5.80089	5.70569	0.210654	0.32925	0.00233454	0.000616583	0.37404	0.531762	0.297057	0.235008	0	1	1	0	0	0	0	0	0	AT1G64585	0	Chr1	23989933	23990097	-	NaN	protein_coding	ROTUNDIFOLIA like 22	---	ROTUNDIFOLIA like 22 (RTFL22); CONTAINS InterPro DOMAIN/s: DVL (InterPro:IPR012552); Has 17 Blast hits to 17 proteins in 7 species: Archae - 0; Bacteria - 0; Metazoa - 0; Fungi - 0; Plants - 17; Viruses - 0; Other Eukaryotes - 0 (source: NCBI BLink).	0	1	0	1
688	Chr1	TAIR10	23990001	23991000	0	-1.09892	-0.459198	-1.3836	-1.08267	-0.96347	-0.498409	-0.420104	-2.51479	5.53102	5.48	5.30972	5.39672	0.0934891	0.209515	0.000108343	0.00132528	0.376416	0.0445613	0.290317	0.0583135	0	1	0	0	0	0	0	0	0	AT1G64585	0	Chr1	23989933	23990097	-	NaN	protein_coding	ROTUNDIFOLIA like 22	---	ROTUNDIFOLIA like 22 (RTFL22); CONTAINS InterPro DOMAIN/s: DVL (InterPro:IPR012552); Has 17 Blast hits to 17 proteins in 7 species: Archae - 0; Bacteria - 0; Metazoa - 0; Fungi - 0; Plants - 17; Viruses - 0; Other Eukaryotes - 0 (source: NCBI BLink).	0	1	0	1
3273	Chr5	TAIR10	26633001	26634000	0	-0.199096	-0.244589	-0.139592	-1.22139	-0.260881	-0.0904375	-0.82097	-2.53082	6.01371	5.77035	6.16163	5.59125	0.462988	0.369747	0.428246	8.82531e-05	0.377898	0.541936	0.896124	0.648874	1	2	0	0	1	0	0	0	0	AT5G66700	-320	Chr5	26634320	26635885	+	NaN	protein_coding	homeobox 53	Encodes a homeodomain protein. Member of HD-ZIP 1 family, most closely related to HB5. AtHB53 is auxin-inducible and its induction is inhibited by cytokinin, especially in roots therefore may be involved in root development.	homeobox 53 (HB53); FUNCTIONS IN: DNA binding, sequence-specific DNA binding transcription factor activity; INVOLVED IN: response to auxin stimulus, regulation of transcription, DNA-dependent, root development; LOCATED IN: nucleus; EXPRESSED IN: 16 plant structures; EXPRESSED DURING: 8 growth stages; CONTAINS InterPro DOMAIN/s: Homeobox, conserved site (InterPro:IPR017970), Homeobox (InterPro:IPR…	0.874469	0.196305	-0.584963	0.361595
1158	Chr2	TAIR10	10829001	10830000	0	-1.76249	-0.851508	-0.885209	-1.43372	-0.907581	-0.793945	0.207489	-1.63199	5.37085	5.31229	5.55496	5.22705	0.0105306	0.0348755	0.00835797	4.78256e-05	0.379163	1.64948	0.296908	0.224912	0	1	0	0	0	0	0	0	0	AT2G25450	0	Chr2	10829916	10831655	-	NaN	protein_coding	2-oxoglutarate (2OG) and Fe(II)-dependent oxygenase superfamily protein	encodes a protein whose sequence is similar to ACC oxidase	2-oxoglutarate (2OG) and Fe(II)-dependent oxygenase superfamily protein; CONTAINS InterPro DOMAIN/s: Oxoglutarate/iron-dependent oxygenase (InterPro:IPR005123); BEST Arabidopsis thaliana protein match is: 2-oxoglutarate (2OG) and Fe(II)-dependent oxygenase superfamily protein (TAIR:AT2G30830.1); Has 7865 Blast hits to 7837 proteins in 966 species: Archae - 0; Bacteria - 1060; Metazoa - 82; Fungi …	0.48036	0.0541633	0.308351	0.0862288
602	Chr1	TAIR10	22243001	22244000	0	0.361758	0.125305	-1.76054	-0.286607	-0.720104	0.808686	0.519439	-1.49147	6.56925	6.18762	5.70228	6.39128	0.112384	0.435783	8.01259e-09	0.218419	0.381194	0.609412	0.08279	0.431465	0	0	0	0	0	0	0	0	0	AT1G60360	0	Chr1	22242748	22243731	-	0	protein_coding	RING/U-box superfamily protein	---	RING/U-box superfamily protein; FUNCTIONS IN: zinc ion binding; CONTAINS InterPro DOMAIN/s: Zinc finger, RING-type (InterPro:IPR001841), Zinc finger, C3HC4 RING-type (InterPro:IPR018957); BEST Arabidopsis thaliana protein match is: RING/U-box superfamily protein (TAIR:AT3G19950.1); Has 9982 Blast hits to 9957 proteins in 273 species: Archae - 0; Bacteria - 6; Metazoa - 2754; Fungi - 1005; Plants …	-0.540568	0.442068	1.42626	0.0122607
2761	Chr5	TAIR10	7462001	7463000	0	-0.867325	-1.22997	-1.34975	-0.716607	-1.34656	-0.38855	-0.135799	-1.31503	6.07948	5.51542	5.80911	6.08203	0.10853	0.00083311	5.88617e-06	0.00765868	0.381837	0.802313	0.0130388	0.305629	1	1	0	0	0	0	0	0	0	AT5G22490	-953	Chr5	7458943	7461049	-	NaN	protein_coding	O-acyltransferase (WSD1-like) family protein	---	O-acyltransferase (WSD1-like) family protein; CONTAINS InterPro DOMAIN/s: O-acyltransferase, WSD1, C-terminal (InterPro:IPR009721), O-acyltransferase, WSD1, N-terminal (InterPro:IPR004255); BEST Arabidopsis thaliana protein match is: O-acyltransferase (WSD1-like) family protein (TAIR:AT5G16350.1); Has 1311 Blast hits to 1297 proteins in 176 species: Archae - 4; Bacteria - 1046; Metazoa - 16; Fung…	-0.932886	0.110184	0.0671142	1
2890	Chr5	TAIR10	15141001	15142000	0	0.307768	0.150064	-1.57315	0.0358589	-0.339258	0.691812	1.11792	-0.900402	5.69999	5.55875	4.96288	5.69014	0.276766	0.440149	9.39416e-05	0.496029	0.383439	0.762102	0.272196	1.24459	0	1	0	0	0	0	0	0	0	AT5G38000	0	Chr5	15141788	15143492	+	NaN	protein_coding	Zinc-binding dehydrogenase family protein	---	Zinc-binding dehydrogenase family protein; FUNCTIONS IN: oxidoreductase activity, binding, zinc ion binding, catalytic activity; INVOLVED IN: response to oxidative stress; CONTAINS InterPro DOMAIN/s: GroES-like (InterPro:IPR011032), NAD(P)-binding domain (InterPro:IPR016040), Alcohol dehydrogenase, C-terminal (InterPro:IPR013149), Alcohol dehydrogenase superfamily, zinc-containing (InterPro:IPR00…	-0.263034	0.765024	0.222392	0.759459
417	Chr1	TAIR10	16154001	16155000	0	0.374789	-0.138241	-1.20231	-0.329402	-0.0492352	0.844079	0.754434	-0.883871	6.16071	5.74834	5.5619	5.94491	0.149539	0.454711	0.000253794	0.224022	0.38439	1.44401	0.152787	0.743864	1	1	0	0	0	0	0	0	0	AT1G43010	0	Chr1	16153609	16154468	+	NaN	protein_coding	Pentatricopeptide repeat (PPR) superfamily protein	---	Pentatricopeptide repeat (PPR) superfamily protein; CONTAINS InterPro DOMAIN/s: Pentatricopeptide repeat (InterPro:IPR002885); BEST Arabidopsis thaliana protein match is: Tetratricopeptide repeat (TPR)-like superfamily protein (TAIR:AT1G28020.1); Has 605 Blast hits to 542 proteins in 61 species: Archae - 0; Bacteria - 0; Metazoa - 0; Fungi - 0; Plants - 603; Viruses - 0; Other Eukaryotes - 2 (sou…	0	1	0	1
2513	Chr5	TAIR10	353001	354000	0	0.097144	0.257035	-0.601161	-1.19809	-0.0871754	0.0424768	-1.06459	-3.27111	6.06361	5.96925	5.892	5.55329	0.463494	0.304126	0.0461209	0.000151864	0.386012	1.64064	0.689861	0.865694	0	1	0	0	0	0	0	0	0	AT5G01900	-933	Chr5	351008	352069	-	2	protein_coding	WRKY DNA-binding protein 62	member of WRKY Transcription Factor; Group III	WRKY DNA-binding protein 62 (WRKY62); CONTAINS InterPro DOMAIN/s: DNA-binding WRKY (InterPro:IPR003657); BEST Arabidopsis thaliana protein match is: WRKY DNA-binding protein 38 (TAIR:AT5G22570.1); Has 3146 Blast hits to 2717 proteins in 131 species: Archae - 0; Bacteria - 0; Metazoa - 0; Fungi - 0; Plants - 3132; Viruses - 0; Other Eukaryotes - 14 (source: NCBI BLink).	-1.5502	0.0426342	1.38391	0.062599
756	Chr1	TAIR10	25015001	25016000	0	-0.985559	-0.768426	-1.37234	-2.02899	-0.155303	-0.436591	-1.16007	-2.76006	4.66417	4.66282	4.43351	4.00698	0.238669	0.125481	0.00543427	0.00017203	0.386557	0.203293	0.335977	0.858586	0	0	0	0	0	0	0	0	0	AT1G67025	-277	Chr1	25013026	25014725	-	NaN	protein_coding	---	---	BEST Arabidopsis thaliana protein match is: Protein kinase superfamily protein (TAIR:AT1G18390.1); Has 221 Blast hits to 191 proteins in 10 species: Archae - 0; Bacteria - 0; Metazoa - 0; Fungi - 0; Plants - 221; Viruses - 0; Other Eukaryotes - 0 (source: NCBI BLink).	0.23816	0.872032	0.358454	0.665836
862	Chr1	TAIR10	28293001	28294000	0	-2.4248	-0.239058	-0.874333	-1.89498	-0.125865	-1.072	-0.942601	-2.08354	4.33546	4.91868	4.70357	4.10583	0.0141357	0.426175	0.0547268	0.000292447	0.387088	0.596395	0.409085	0.876301	0	0	0	0	1	0	0	0	0	AT1G75390	0	Chr1	28291698	28293008	+	NaN	protein_coding	basic leucine-zipper 44	---	basic leucine-zipper 44 (bZIP44); FUNCTIONS IN: DNA binding, protein heterodimerization activity, sequence-specific DNA binding transcription factor activity; INVOLVED IN: regulation of transcription, DNA-dependent; LOCATED IN: chloroplast; CONTAINS InterPro DOMAIN/s: Basic-leucine zipper (bZIP) transcription factor (InterPro:IPR004827), bZIP transcription factor, bZIP-1 (InterPro:IPR011616); BES…	0	1	0	1
474	Chr1	TAIR10	18241001	18242000	0	0.386173	0.220561	-3.08841	-1.48328	-0.755793	0.877167	0.127308	-3.83063	5.67962	5.54864	4.17571	4.86956	0.199638	0.380356	1.89344e-09	0.00021916	0.388033	0.266538	0.107303	0.325197	0	0	0	0	0	0	0	0	0	NaN	NaN	NaN	NaN	NaN	NaN	NaN	NaN	NaN	NaN	NaN	NaN	NaN	NaN	NaN
1623	Chr3	TAIR10	6912001	6913000	0	-0.462001	0.0506596	-1.55666	-0.329838	-0.0948768	-0.20309	-0.130457	-2.65049	5.57224	5.61688	5.1103	5.65231	0.36858	0.492493	4.55198e-05	0.259147	0.39046	2.32806	0.260116	0.555839	0	0	0	0	0	0	0	0	0	AT3G19880	0	Chr3	6911435	6912604	-	NaN	protein_coding	F-box and associated interaction domains-containing protein	---	F-box and associated interaction domains-containing protein; CONTAINS InterPro DOMAIN/s: F-box domain, cyclin-like (InterPro:IPR001810), F-box domain, Skp2-like (InterPro:IPR022364), F-box associated domain, type 1 (InterPro:IPR006527), F-box associated interaction domain (InterPro:IPR017451); BEST Arabidopsis thaliana protein match is: F-box and associated interaction domains-containing protein …	0	1	0	1
573	Chr1	TAIR10	21419001	21420000	0	-0.382123	0.1056	-1.53272	-2.50717	-0.35157	-0.168024	-0.725478	-3.99604	5.44405	5.53155	4.97588	4.41193	0.413116	0.469962	0.000134963	4.68249e-08	0.390586	1.34505	0.445707	0.754567	0	1	0	0	0	0	0	0	0	AT1G57830	-309	Chr1	21420309	21420803	+	NaN	protein_coding	Toll-Interleukin-Resistance (TIR) domain family protein	---	Toll-Interleukin-Resistance (TIR) domain family protein; FUNCTIONS IN: transmembrane receptor activity; INVOLVED IN: signal transduction, defense response, innate immune response; LOCATED IN: intrinsic to membrane; EXPRESSED IN: 12 plant structures; EXPRESSED DURING: 9 growth stages; CONTAINS InterPro DOMAIN/s: Toll-Interleukin receptor (InterPro:IPR000157); BEST Arabidopsis thaliana protein matc…	0	1	0	1
1208	Chr2	TAIR10	12383001	12384000	0	0.40982	0.237175	-1.26388	-0.063668	-0.238946	0.178917	0.407176	-0.603159	5.85895	5.68448	5.21786	5.75088	0.155053	0.353234	0.000676994	0.487061	0.390873	0.263018	0.354268	0.583067	0	0	0	0	0	0	0	0	0	AT2G28850	0	Chr2	12383480	12384961	-	NaN	protein_coding	cytochrome P450, family 710, subfamily A, polypeptide 3	member of CYP710A	cytochrome P450, family 710, subfamily A, polypeptide 3 (CYP710A3); FUNCTIONS IN: electron carrier activity, monooxygenase activity, iron ion binding, oxygen binding, heme binding; INVOLVED IN: oxidation reduction; LOCATED IN: endomembrane system; EXPRESSED IN: stem, petal, root cap of the primary root; CONTAINS InterPro DOMAIN/s: Cytochrome P450 (InterPro:IPR001128), Cytochrome P450, conserved s…	0.137504	1	0.137504	1
1300	Chr2	TAIR10	15712001	15713000	0	-1.90679	-0.225961	-1.03649	-1.85345	-0.263208	-0.83462	-0.918146	-3.44805	5.58427	5.7766	5.72794	5.27264	0.00265308	0.386032	0.000896014	5.70965e-08	0.391387	0.60606	0.53799	0.752009	0	1	0	0	0	0	0	0	0	NaN	NaN	NaN	NaN	NaN	NaN	NaN	NaN	NaN	NaN	NaN	NaN	NaN	NaN	NaN
1539	Chr3	TAIR10	3543001	3544000	0	0.237289	0.138255	-1.73128	-1.00039	-1.10613	0.55371	1.21515	-1.06675	6.24902	5.99768	5.46227	5.77024	0.298933	0.431776	2.07338e-07	0.000706588	0.399018	0.79452	0.23767	0.0502444	1	0	0	0	0	0	0	0	1	AT3G11310	0	Chr3	3542536	3544333	-	NaN	protein_coding	---	---	unknown protein; BEST Arabidopsis thaliana protein match is: unknown protein (TAIR:AT3G11290.1); Has 575 Blast hits to 342 proteins in 22 species: Archae - 0; Bacteria - 2; Metazoa - 0; Fungi - 10; Plants - 559; Viruses - 0; Other Eukaryotes - 4 (source: NCBI BLink).	0	1	0	1
907	Chr1	TAIR10	29880001	29881000	0	-0.776563	-1.05308	-1.19303	-2.53851	-0.668421	-0.333315	-1.68496	-3.01358	4.83382	4.62736	4.63534	3.87243	0.298323	0.0396857	0.00982551	5.49609e-06	0.400087	0.230948	0.432988	0.583503	0	0	0	0	0	0	0	0	0	AT1G79430	-796	Chr1	29877228	29879206	-	NaN	protein_coding	Homeodomain-like superfamily protein	Encodes gene product that is required for several aspects of phloem development in the root: (1) the specific divisions organizing the phloem pole, (2) sieve element differentiation and (3) the expression of a companion-specific gene. Mutant has a defect in the organization of phloem poles in the root. apl seedlings have a short, determinate root with only occasional lateral branches.	ALTERED PHLOEM DEVELOPMENT (APL); BEST Arabidopsis thaliana protein match is: Homeodomain-like superfamily protein (TAIR:AT3G12730.1); Has 30201 Blast hits to 17322 proteins in 780 species: Archae - 12; Bacteria - 1396; Metazoa - 17338; Fungi - 3422; Plants - 5037; Viruses - 0; Other Eukaryotes - 2996 (source: NCBI BLink).	-0.187627	0.745238	0.337834	0.282252
2820	Chr5	TAIR10	9015001	9016000	0	0.272626	0.125728	-2.6492	-1.09115	-0.955178	0.637947	0.825273	-2.76753	5.9392	5.74208	4.69843	5.38954	0.289118	0.451685	7.01624e-10	0.0012438	0.40032	0.734045	0.0218536	0.066512	1	0	0	0	0	0	0	0	0	AT5G25850	0	Chr5	9014082	9015917	+	NaN	protein_coding	F-box/RNI-like/FBD-like domains-containing protein	---	F-box/RNI-like/FBD-like domains-containing protein; CONTAINS InterPro DOMAIN/s: FBD (InterPro:IPR013596), F-box domain, cyclin-like (InterPro:IPR001810), F-box domain, Skp2-like (InterPro:IPR022364), FBD-like (InterPro:IPR006566), Leucine-rich repeat 2 (InterPro:IPR013101); BEST Arabidopsis thaliana protein match is: F-box/RNI-like/FBD-like domains-containing protein (TAIR:AT5G53635.1); Has 1807 …	0	1	0	1
28	Chr1	TAIR10	858001	859000	0	-0.584991	0.11383	-1.19791	-0.867257	-0.824063	-0.251028	0.396466	-1.579	5.80321	5.84772	5.54052	5.65156	0.281687	0.457136	0.000299692	0.00532735	0.400427	0.551705	0.137334	0.0255691	0	1	0	0	0	0	0	0	0	AT1G03445	0	Chr1	854410	859701	-	NaN	protein_coding	Serine/threonine protein phosphatase family protein	encodes a serine?threonine protein phosphatase with an N-terminal Kelch-repeat domain, which is nuclear localized and expressed preferentially in elongating cells. Genetic evidence suggest that this gene plays a redundant role (along with other members of the same gene family) in modulating growth in response to brassinosteroid.	BRI1 SUPPRESSOR 1 (BSU1); FUNCTIONS IN: protein binding, protein serine/threonine phosphatase activity; INVOLVED IN: brassinosteroid mediated signaling pathway, regulation of protein localization; LOCATED IN: nucleus; EXPRESSED IN: sperm cell, male gametophyte, cultured cell, pollen tube; EXPRESSED DURING: L mature pollen stage, M germinated pollen stage; CONTAINS InterPro DOMAIN/s: Serine/threon…	-0.514573	0.391528	0.201634	0.760792
352	Chr1	TAIR10	11499001	11500000	0	0.283709	-0.171767	-2.10633	-1.15663	-0.452233	0.670105	0.0313637	-4.02985	5.51433	5.27619	4.53554	4.91611	0.32141	0.449861	5.26321e-06	0.00390186	0.404259	1.46767	0.313574	0.438366	1	0	0	0	0	0	0	0	0	NaN	NaN	NaN	NaN	NaN	NaN	NaN	NaN	NaN	NaN	NaN	NaN	NaN	NaN	NaN
2747	Chr5	TAIR10	7345001	7346000	0	0.269327	0.341902	-1.04878	-0.280511	-0.395627	0.636963	0.528125	-1.11245	6.43769	6.23095	5.96043	6.30695	0.234946	0.174162	0.000248335	0.236587	0.404756	0.213552	0.0294871	0.17076	0	1	0	0	0	0	0	0	0	AT5G22150	0	Chr5	7342567	7345956	+	NaN	protein_coding	---	---	unknown protein; BEST Arabidopsis thaliana protein match is: unknown protein (TAIR:AT5G22160.1); Has 30201 Blast hits to 17322 proteins in 780 species: Archae - 12; Bacteria - 1396; Metazoa - 17338; Fungi - 3422; Plants - 5037; Viruses - 0; Other Eukaryotes - 2996 (source: NCBI BLink).	-0.137504	1	0.347923	0.690038
150	Chr1	TAIR10	4830001	4831000	0	0.258492	0.221376	-1.74157	0.0183242	-0.388526	0.614914	0.528578	-1.60065	6.12353	5.93562	5.32329	6.14025	0.285728	0.348737	6.81593e-07	0.49858	0.40715	0.408539	0.0421878	1.10497	0	1	0	0	0	0	0	0	0	AT1G14110	0	Chr1	4830297	4831915	+	NaN	protein_coding	fucosyltransferase 9	member of xyloglucan fucosyltransferase family	fucosyltransferase 9 (FUT9); FUNCTIONS IN: fucosyltransferase activity; INVOLVED IN: cell wall biogenesis; LOCATED IN: endomembrane system, membrane; EXPRESSED IN: stem, cauline leaf; CONTAINS InterPro DOMAIN/s: Xyloglucan fucosyltransferase (InterPro:IPR004938); BEST Arabidopsis thaliana protein match is: fucosyltransferase 8 (TAIR:AT1G14100.1); Has 330 Blast hits to 321 proteins in 17 species: …	0	1	0	1
2483	Chr4	TAIR10	17323001	17324000	0	-1.07272	-0.385222	-0.879919	-1.31387	-0.650124	-0.452008	-1.07115	-3.12794	5.33896	5.36123	5.35627	5.07775	0.123471	0.284533	0.0147628	0.000452972	0.40763	0.471632	0.561183	0.338303	0	0	0	0	1	0	1	0	0	AT4G36750	-571	Chr4	17324571	17326457	+	NaN	protein_coding	Quinone reductase family protein	---	Quinone reductase family protein; FUNCTIONS IN: oxidoreductase activity, FMN binding; INVOLVED IN: negative regulation of transcription; LOCATED IN: plasma membrane; EXPRESSED IN: 24 plant structures; EXPRESSED DURING: 13 growth stages; CONTAINS InterPro DOMAIN/s: Flavoprotein WrbA (InterPro:IPR010089), Flavodoxin/nitric oxide synthase (InterPro:IPR008254); BEST Arabidopsis thaliana protein match…	0.196958	0.626556	0.0473455	0.855439
2803	Chr5	TAIR10	8401001	8402000	0	0.118133	0.0484328	-1.88762	-1.26096	-0.841764	0.282136	0.473608	-3.00059	5.86482	5.70561	5.0674	5.30757	0.453468	0.492702	8.41979e-07	0.000258536	0.407694	0.81134	0.227779	0.199548	0	0	0	0	0	0	0	0	0	AT5G24560	-205	Chr5	8402205	8403266	+	NaN	protein_coding	phloem protein 2-B12	---	phloem protein 2-B12 (PP2-B12); CONTAINS InterPro DOMAIN/s: F-box domain, cyclin-like (InterPro:IPR001810), F-box domain, Skp2-like (InterPro:IPR022364); BEST Arabidopsis thaliana protein match is: phloem protein 2-B1 (TAIR:AT2G02230.1); Has 1807 Blast hits to 1807 proteins in 277 species: Archae - 0; Bacteria - 0; Metazoa - 736; Fungi - 347; Plants - 385; Viruses - 0; Other Eukaryotes - 339 (sou…	0.137504	1	0	1
1238	Chr2	TAIR10	13279001	13280000	0	-0.36987	0.3615	-0.996186	-1.55733	0.127787	-0.155801	-1.11441	-3.02831	5.69891	5.8512	5.48181	5.14467	0.403921	0.20204	0.00362882	1.65411e-05	0.408784	1.96549	0.505189	1.18043	1	1	0	1	1	0	0	0	0	NaN	NaN	NaN	NaN	NaN	NaN	NaN	NaN	NaN	NaN	NaN	NaN	NaN	NaN	NaN
2684	Chr5	TAIR10	5152001	5153000	0	0.149907	0.248998	-0.315333	-1.95703	-0.928226	0.359784	0.0555011	-1.60277	6.2606	6.09513	6.19745	5.34851	0.40653	0.300519	0.222348	3.44233e-09	0.410164	0.631314	0.671903	0.356821	0	1	0	0	0	0	0	0	0	AT5G15800	0	Chr5	5151334	5154154	-	0	protein_coding	K-box region and MADS-box transcription factor family protein	Encodes a MADS box transcription factor involved flower and ovule development. Functionally redundant with SEP2 and SEP3.	SEPALLATA1 (SEP1); FUNCTIONS IN: DNA binding, sequence-specific DNA binding transcription factor activity; INVOLVED IN: flower development, ovule development; LOCATED IN: nucleus; EXPRESSED IN: 12 plant structures; EXPRESSED DURING: 6 growth stages; CONTAINS InterPro DOMAIN/s: Transcription factor, MADS-box (InterPro:IPR002100), Transcription factor, K-box (InterPro:IPR002487); BEST Arabidopsis t…	0.120294	0.914447	0.334419	0.536867
1182	Chr2	TAIR10	11896001	11897000	0	0.318563	-0.762343	-2.37079	-1.60611	-0.344111	0.763895	-0.222556	-3.09667	4.9641	4.58498	3.84934	4.11014	0.341769	0.137747	5.92837e-05	0.00235621	0.410649	0.549178	0.132813	0.647771	0	0	0	0	0	0	0	0	0	AT2G27940	-942	Chr2	11897942	11898867	+	1	protein_coding	RING/U-box superfamily protein	---	RING/U-box superfamily protein; FUNCTIONS IN: zinc ion binding; EXPRESSED IN: leaf apex, root, carpel, leaf; EXPRESSED DURING: LP.04 four leaves visible, 4 anthesis; CONTAINS InterPro DOMAIN/s: Zinc finger, RING-type (InterPro:IPR001841), Zinc finger, C3HC4 RING-type (InterPro:IPR018957); BEST Arabidopsis thaliana protein match is: RING/U-box superfamily protein (TAIR:AT3G05200.1); Has 9623 Blast…	0.241008	0.83882	0.125531	1
865	Chr1	TAIR10	28349001	28350000	0	-0.0859821	-0.213491	-0.605905	-1.71653	-0.604071	-0.205649	-0.997614	-3.32543	5.22247	5.16005	5.13034	4.50458	0.495873	0.430089	0.119894	0.000160094	0.41317	0.648515	0.692108	0.479797	0	1	0	0	1	0	0	0	0	AT1G75510	-267	Chr1	28347055	28348735	-	NaN	protein_coding	Transcription initiation factor IIF, beta subunit	---	Transcription initiation factor IIF, beta subunit; FUNCTIONS IN: RNA polymerase II transcription factor activity, general RNA polymerase II transcription factor activity, catalytic activity, ATP binding, ATP-dependent helicase activity; INVOLVED IN: transcription initiation from RNA polymerase II promoter, transcription from RNA polymerase II promoter; LOCATED IN: mitochondrion, transcription fac…	0.136548	0.742579	0.0780025	0.76443
2277	Chr4	TAIR10	10358001	10359000	0	-3.85974	0.0448544	-1.3813	-0.933799	-1.3608	-1.6003	0.312657	-2.2846	3.99866	5.06265	4.48143	4.60887	0.00038497	0.495978	0.0043872	0.038805	0.413965	0.744907	0.24654	0.186253	0	0	0	0	0	0	0	0	0	AT4G18900	0	Chr4	10356465	10359078	+	1	protein_coding	Transducin/WD40 repeat-like superfamily protein	---	Transducin/WD40 repeat-like superfamily protein; CONTAINS InterPro DOMAIN/s: WD40 repeat 2 (InterPro:IPR019782), WD40 repeat, conserved site (InterPro:IPR019775), WD40 repeat (InterPro:IPR001680), G-protein beta WD-40 repeat, region (InterPro:IPR020472), WD40 repeat-like-containing domain (InterPro:IPR011046), WD40-repeat-containing domain (InterPro:IPR017986), WD40/YVTN repeat-like-containing do…	5.70044	8.39857e-13	0.206451	0.850554
1150	Chr2	TAIR10	10675001	10676000	0	-3.03275	-1.19942	-2.72822	-2.78192	-0.749454	-1.25621	-0.945847	-3.09959	4.27821	4.56959	3.90557	3.75935	0.00234049	0.0212556	1.8842e-06	1.50054e-06	0.414404	0.11831	0.0637449	0.575872	0	0	0	0	0	0	0	0	0	NaN	NaN	NaN	NaN	NaN	NaN	NaN	NaN	NaN	NaN	NaN	NaN	NaN	NaN	NaN
1141	Chr2	TAIR10	10317001	10318000	0	-0.976771	0.0423857	-1.12412	-0.719936	-0.826773	-0.402253	0.00523976	-2.15752	6.24037	6.2194	6.10299	6.27311	0.0573169	0.492025	3.22694e-05	0.00405359	0.417217	0.748526	0.315096	0.0691634	0	1	1	0	0	0	0	0	0	AT2G24255	0	Chr2	10315515	10317353	-	1	protein_coding	---	---	unknown protein; CONTAINS InterPro DOMAIN/s: Protein of unknown function DUF295 (InterPro:IPR005174); BEST Arabidopsis thaliana protein match is: Protein of unknown function (DUF295) (TAIR:AT1G64840.1); Has 124 Blast hits to 121 proteins in 7 species: Archae - 0; Bacteria - 0; Metazoa - 0; Fungi - 0; Plants - 124; Viruses - 0; Other Eukaryotes - 0 (source: NCBI BLink).	0.447459	0.557197	-0.137504	1
2173	Chr4	TAIR10	7420001	7421000	0	0.28885	0.345215	-2.43545	-0.346018	-0.420061	0.706151	0.523434	-3.21963	5.12106	5.22276	3.98746	4.91611	0.352781	0.29297	1.37156e-05	0.323892	0.418556	0.204697	0.138716	0.0969046	0	0	0	0	0	0	0	0	0	NaN	NaN	NaN	NaN	NaN	NaN	NaN	NaN	NaN	NaN	NaN	NaN	NaN	NaN	NaN
493	Chr1	TAIR10	18974001	18975000	0	-0.73067	-0.565812	-1.72062	-2.53448	0.0348764	-0.299146	-1.72797	-4.04844	5.0036	4.96159	4.53759	4.03652	0.298963	0.198867	0.000238876	1.44729e-06	0.419845	0.507099	0.40364	1.02873	0	1	0	0	0	0	0	0	0	NaN	NaN	NaN	NaN	NaN	NaN	NaN	NaN	NaN	NaN	NaN	NaN	NaN	NaN	NaN
1356	Chr2	TAIR10	17237001	17238000	0	-4.41055	-1.13146	-1.57775	-3.19636	-0.54748	-1.7982	-1.4332	-3.19538	3.30683	4.1221	3.84126	2.91023	0.00150591	0.0636828	0.009473	4.21089e-05	0.420889	0.117745	0.339046	0.707908	0	1	0	0	0	0	0	0	1	AT2G41370	0	Chr2	17237745	17240440	-	1	protein_coding	Ankyrin repeat family protein / BTB/POZ domain-containing protein	Encodes BOP2, a cytoplasmic and nuclear-localized NPR1 like protein with BTB/POZ domain and ankyrin repeats. Interacts with BOP1 and appears to be genetically redundant with BOP1.bop1/bop2 double mutants have longer leaves, often with leaflets on the petiole, asymmetric flowers with extra organs and no nectaries. Also defective in floral organ abscission. BOP1/2 promotes floral meristem fate and …	BLADE ON PETIOLE2 (BOP2); CONTAINS InterPro DOMAIN/s: BTB/POZ (InterPro:IPR013069), BTB/POZ fold (InterPro:IPR011333), Ankyrin repeat-containing domain (InterPro:IPR020683), BTB/POZ-like (InterPro:IPR000210), Ankyrin repeat (InterPro:IPR002110); BEST Arabidopsis thaliana protein match is: Ankyrin repeat family protein / BTB/POZ domain-containing protein (TAIR:AT3G57130.1); Has 6067 Blast hits to …	0.64811	0.277445	0.0334969	0.937836
1037	Chr2	TAIR10	7435001	7436000	0	0.423637	-0.0480482	-1.58761	0.188543	-0.511111	1.04385	1.325	-1.08678	5.65419	5.38367	4.85376	5.66026	0.168853	0.495566	0.00015148	0.402895	0.422062	1.07357	0.187409	2.18254	0	0	0	0	0	0	0	0	0	AT2G17090	0	Chr2	7435088	7437298	-	NaN	protein_coding	Protein kinase protein with tetratricopeptide repeat domain	Encodes a N-myrystolylated plasma membrane associated member of the RLCK II family of IRAK/Pelle-like kinases that regulates the MAPK pathway that promotes the elongation of the Arabidopsis zygote and the development of its basal daughter cell into the extra-embryonic suspensor. SSP transcripts are produced in mature pollen but are not translated until delivery to the zygote and the endosperm aft…	SHORT SUSPENSOR (SSP); FUNCTIONS IN: binding, protein kinase activity, kinase activity, ATP binding; INVOLVED IN: suspensor development, positive regulation of intracellular protein kinase cascade, N-terminal protein myristoylation, zygote elongation; LOCATED IN: internal side of plasma membrane; EXPRESSED IN: zygote, sperm cell, male gametophyte, micropylar endosperm, pollen tube; EXPRESSED DURI…	0	1	0	1
1456	Chr3	TAIR10	420001	421000	0	0.2378	0.661612	-1.09209	-0.952258	-0.148923	0.0956846	-0.0640483	-2.75453	6.08958	6.13777	5.61229	5.63079	0.314837	0.0123339	0.000766485	0.00226356	0.423613	1.21031	0.432407	0.730849	0	1	0	0	0	0	0	0	0	AT3G02242	0	Chr3	420108	420680	+	NaN	protein_coding	---	---	unknown protein; FUNCTIONS IN: molecular_function unknown; INVOLVED IN: biological_process unknown; LOCATED IN: endomembrane system; BEST Arabidopsis thaliana protein match is: unknown protein (TAIR:AT3G02240.1); Has 30201 Blast hits to 17322 proteins in 780 species: Archae - 12; Bacteria - 1396; Metazoa - 17338; Fungi - 3422; Plants - 5037; Viruses - 0; Other Eukaryotes - 2996 (source: NCBI BLin…	0	1	0	1
2329	Chr4	TAIR10	12114001	12115000	0	0.179953	-0.454721	-1.12075	-0.135097	-0.342313	0.447133	0.450483	-1.50576	6.23975	5.74388	5.7749	6.22275	0.37266	0.179556	0.000240494	0.424488	0.424711	404.582	0.146697	0.435868	0	0	0	0	0	0	0	0	0	AT4G23120	0	Chr4	12113308	12115523	+	NaN	protein_coding	Bromo-adjacent homology (BAH) domain-containing protein	---	Bromo-adjacent homology (BAH) domain-containing protein; FUNCTIONS IN: DNA binding; LOCATED IN: cellular_component unknown; CONTAINS InterPro DOMAIN/s: Bromo adjacent homology (BAH) domain (InterPro:IPR001025); BEST Arabidopsis thaliana protein match is: Bromo-adjacent homology (BAH) domain-containing protein (TAIR:AT2G25120.1); Has 462 Blast hits to 462 proteins in 68 species: Archae - 0; Bacter…	0	1	0	1
204	Chr1	TAIR10	6840001	6841000	0	0.0767835	0.319739	-0.906737	-1.38521	-0.99944	0.192242	-0.401633	-2.39035	5.95288	5.92405	5.64606	5.35677	0.478541	0.237228	0.00516515	3.93044e-05	0.426007	9.02911	0.45025	0.161908	0	2	1	0	0	0	0	0	0	AT1G19790	0	Chr1	6838120	6840293	-	0	protein_coding	SHI-related sequence 7	A member of SHI gene family. Arabidopsis thaliana has ten members that encode proteins with a RING finger-like zinc finger motif. Despite being highly divergent in sequence, many of the SHI-related genes are partially redundant in function and synergistically promote gynoecium, stamen and leaf development in Arabidopsis.	SHI-related sequence 7 (SRS7); CONTAINS InterPro DOMAIN/s: Lateral Root Primordium type 1, C-terminal (InterPro:IPR006511), Zinc finger, Lateral Root Primordium type 1 (InterPro:IPR006510), Protein of unknown function DUF702 (InterPro:IPR007818); BEST Arabidopsis thaliana protein match is: SHI-related sequence 5 (TAIR:AT1G75520.1); Has 184 Blast hits to 184 proteins in 22 species: Archae - 0; Bac…	-0.104337	0.955111	0.274175	0.752911
13	Chr1	TAIR10	465001	466000	0	0.590517	-0.00316627	-0.523785	-2.34861	-1.30939	0.236571	-0.463491	-1.62245	5.27622	5.05206	4.9108	3.91925	0.0986353	0.499985	0.199957	2.09999e-05	0.426911	0.990676	0.512381	0.284252	0	1	0	0	0	0	0	0	0	AT1G02340	0	Chr1	465718	467844	-	0	protein_coding	basic helix-loop-helix (bHLH) DNA-binding superfamily protein	Encodes a light-inducible, nuclear bHLH protein involved in phytochrome signaling. Mutants exhibit a long-hypocotyl phenotype only under far-red light but not under red light and are defective in other phytochrome A-related responses. Mutants also show blue light response defects. HFR1 interacts with COP1, co-localizes to the nuclear specks and is ubiquinated by COP1.	LONG HYPOCOTYL IN FAR-RED (HFR1); CONTAINS InterPro DOMAIN/s: Helix-loop-helix DNA-binding domain (InterPro:IPR001092), Helix-loop-helix DNA-binding (InterPro:IPR011598); BEST Arabidopsis thaliana protein match is: phytochrome interacting factor 3 (TAIR:AT1G09530.2); Has 1715 Blast hits to 1709 proteins in 90 species: Archae - 0; Bacteria - 0; Metazoa - 4; Fungi - 4; Plants - 1707; Viruses - 0; O…	1.87288	4.54983e-08	-0.395206	0.133267
1101	Chr2	TAIR10	9347001	9348000	0	-3.09488	0.0332723	-1.21205	-1.08862	-0.622993	-1.2433	-0.0700618	-2.23195	5.70266	6.20861	6.05266	6.08039	1.53634e-07	0.495107	9.86728e-06	3.27056e-05	0.427005	2.97027	0.296309	0.272359	0	1	0	0	0	0	0	0	0	AT2G21930	0	Chr2	9347641	9349128	-	1	protein_coding	F-box associated ubiquitination effector family protein	A paternally expressed imprinted gene.	F-box associated ubiquitination effector family protein; CONTAINS InterPro DOMAIN/s: F-box associated domain, type 3 (InterPro:IPR013187), F-box associated interaction domain (InterPro:IPR017451); BEST Arabidopsis thaliana protein match is: F-box and associated interaction domains-containing protein (TAIR:AT4G38870.1); Has 35333 Blast hits to 34131 proteins in 2444 species: Archae - 798; Bacteria…	1.34395	0.019133	-0.115477	1
1066	Chr2	TAIR10	8176001	8177000	0	-0.444299	-1.07888	-1.30826	-2.29733	-0.735357	-0.178818	-0.389083	-1.88901	4.99963	4.67903	4.66143	4.07774	0.41363	0.0317626	0.00406471	1.06424e-05	0.427425	0.470543	0.181755	0.515385	0	0	0	0	0	0	0	0	0	AT2G18880	0	Chr2	8172189	8178995	+	NaN	protein_coding	vernalization5/VIN3-like	---	vernalization5/VIN3-like (VEL2); FUNCTIONS IN: molecular_function unknown; INVOLVED IN: biological_process unknown; LOCATED IN: cellular_component unknown; EXPRESSED IN: leaf; CONTAINS InterPro DOMAIN/s: Fibronectin, type III (InterPro:IPR003961); BEST Arabidopsis thaliana protein match is: vernalization5/VIN3-like (TAIR:AT4G30200.3); Has 278 Blast hits to 186 proteins in 23 species: Archae - 0; …	0	1	-0.137504	1
215	Chr1	TAIR10	7059001	7060000	0	-0.854659	-0.318663	-0.332172	-2.21683	-0.557166	-0.342018	-1.24335	-3.23699	5.01508	5.10233	5.24695	4.23884	0.246003	0.362203	0.313971	6.88344e-06	0.429105	0.592744	0.814322	0.598725	1	0	0	0	0	0	0	0	0	NaN	NaN	NaN	NaN	NaN	NaN	NaN	NaN	NaN	NaN	NaN	NaN	NaN	NaN	NaN
1932	Chr3	TAIR10	19294001	19295000	0	0.267777	0.228446	-1.46464	-0.735752	-0.830863	0.105824	0.159388	-2.04471	6.35943	6.11523	5.68419	6	0.246521	0.323783	2.37335e-06	0.00779148	0.431184	0.177146	0.165387	0.0607887	1	1	0	0	0	0	0	0	0	AT3G52000	0	Chr3	19293010	19294702	+	NaN	protein_coding	serine carboxypeptidase-like 36	---	serine carboxypeptidase-like 36 (scpl36); FUNCTIONS IN: serine-type carboxypeptidase activity; INVOLVED IN: proteolysis; LOCATED IN: endomembrane system; EXPRESSED IN: male gametophyte, pollen tube; EXPRESSED DURING: L mature pollen stage, M germinated pollen stage; CONTAINS InterPro DOMAIN/s: Peptidase S10, serine carboxypeptidase (InterPro:IPR001563), Peptidase S10, serine carboxypeptidase, act…	0	1	0	1
2809	Chr5	TAIR10	8780001	8781000	0	-0.643639	-0.000449907	-0.506281	-1.68308	-0.953896	-0.254852	0.139437	-1.98995	6.46363	6.30457	6.53788	5.93485	0.166786	0.499999	0.0355063	4.42208e-10	0.433677	0.992197	0.59484	0.276734	0	1	0	0	0	0	0	0	0	AT5G25300	0	Chr5	8780258	8783093	+	NaN	protein_coding	---	---	CONTAINS InterPro DOMAIN/s: F-box domain, cyclin-like (InterPro:IPR001810); BEST Arabidopsis thaliana protein match is: F-box family protein with a domain of unknown function (DUF295) (TAIR:AT5G25290.1); Has 285 Blast hits to 224 proteins in 5 species: Archae - 0; Bacteria - 0; Metazoa - 0; Fungi - 0; Plants - 282; Viruses - 0; Other Eukaryotes - 3 (source: NCBI BLink).	0	1	0	1
2886	Chr5	TAIR10	15123001	15124000	0	0.225258	0.417068	-1.68001	-0.340603	-0.170252	0.572043	0.261537	-2.46789	6.46424	6.30552	5.7048	6.32665	0.291921	0.0957795	3.89028e-08	0.163399	0.43386	0.228519	0.190038	0.334774	0	2	0	0	0	0	0	0	0	AT5G37970	0	Chr5	15123089	15124684	-	NaN	protein_coding	S-adenosyl-L-methionine-dependent methyltransferases superfamily protein	---	S-adenosyl-L-methionine-dependent methyltransferases superfamily protein; FUNCTIONS IN: S-adenosylmethionine-dependent methyltransferase activity, methyltransferase activity; INVOLVED IN: biological_process unknown; EXPRESSED IN: 6 plant structures; EXPRESSED DURING: M germinated pollen stage, 4 anthesis, petal differentiation and expansion stage; CONTAINS InterPro DOMAIN/s: SAM dependent carboxy…	0	1	0.263034	0.831812
141	Chr1	TAIR10	4664001	4665000	0	0.272083	0.216326	-1.35066	-0.639134	-0.335067	0.691331	0.430208	-1.81032	6.2542	6.02741	5.63322	5.93835	0.253631	0.34653	2.1365e-05	0.0246723	0.434268	0.329794	0.145509	0.312762	0	0	0	0	0	0	0	0	0	AT1G13610	0	Chr1	4663831	4666031	-	NaN	protein_coding	alpha/beta-Hydrolases superfamily protein	---	alpha/beta-Hydrolases superfamily protein; EXPRESSED IN: cotyledon, hypocotyl, root; CONTAINS InterPro DOMAIN/s: Alpha/beta hydrolase fold-1 (InterPro:IPR000073); BEST Arabidopsis thaliana protein match is: alpha/beta-Hydrolases superfamily protein (TAIR:AT3G30380.2); Has 4490 Blast hits to 4478 proteins in 963 species: Archae - 8; Bacteria - 1669; Metazoa - 672; Fungi - 266; Plants - 333; Viruse…	-0.222392	0.845019	0.192645	0.855536
3231	Chr5	TAIR10	24967001	24968000	0	0.238215	-0.128864	-2.81409	-2.09709	-0.583307	0.608615	0.0576535	-3.49154	5.1555	5.03913	3.86429	4.10177	0.392161	0.475394	1.21765e-06	5.57581e-05	0.436365	2.69493	0.10747	0.565183	0	0	0	0	0	0	0	1	0	AT5G62165	0	Chr5	24964700	24968520	+	0	protein_coding	AGAMOUS-like 42	Encodes a MADS box transcription factor. Expressed in quiescent center. Involved in floral transition.	AGAMOUS-like 42 (AGL42); FUNCTIONS IN: sequence-specific DNA binding transcription factor activity; INVOLVED IN: regulation of transcription, DNA-dependent; LOCATED IN: nucleus; EXPRESSED IN: 17 plant structures; EXPRESSED DURING: 8 growth stages; CONTAINS InterPro DOMAIN/s: Transcription factor, MADS-box (InterPro:IPR002100), Transcription factor, K-box (InterPro:IPR002487); BEST Arabidopsis tha…	-1.10692	0.0275332	1.28011	0.11641
2855	Chr5	TAIR10	12598001	12599000	0	0.183176	-0.29783	-1.78919	-1.08605	-1.72393	0.468378	0.577065	-1.28543	5.51325	5.25834	4.73645	5.00176	0.415939	0.365336	3.77231e-05	0.00533506	0.436387	3.11091	0.163953	0.227167	0	0	0	0	0	0	0	0	0	AT5G33355	-253	Chr5	12599253	12599671	+	NaN	protein_coding	Defensin-like (DEFL) family protein	Encodes a defensin-like (DEFL) family protein.	Defensin-like (DEFL) family protein; LOCATED IN: endomembrane system; BEST Arabidopsis thaliana protein match is: unknown protein (TAIR:AT3G59930.1); Has 30201 Blast hits to 17322 proteins in 780 species: Archae - 12; Bacteria - 1396; Metazoa - 17338; Fungi - 3422; Plants - 5037; Viruses - 0; Other Eukaryotes - 2996 (source: NCBI BLink).	0	1	0	1
2309	Chr4	TAIR10	11684001	11685000	0	0.313136	-0.478783	-1.58237	0.545768	-0.0244706	0.806963	1.07309	-1.63493	5.44182	5.07512	4.70154	5.678	0.29967	0.244789	0.000357761	0.0800681	0.440092	2.60248	0.0163452	1.0897	0	0	0	0	0	0	0	0	0	AT4G22050	0	Chr4	11683865	11685644	+	NaN	protein_coding	Eukaryotic aspartyl protease family protein	---	Eukaryotic aspartyl protease family protein; FUNCTIONS IN: aspartic-type endopeptidase activity; INVOLVED IN: proteolysis; LOCATED IN: endomembrane system; EXPRESSED IN: 6 plant structures; EXPRESSED DURING: LP.04 four leaves visible, 4 anthesis, C globular stage, petal differentiation and expansion stage; CONTAINS InterPro DOMAIN/s: Peptidase aspartic (InterPro:IPR021109), Peptidase aspartic, ca…	-0.943416	0.0729514	1.37851	0.0846702
2646	Chr5	TAIR10	4066001	4067000	0	0.150359	0.0967911	-0.795323	-1.09806	-0.870564	0.389202	-0.666588	-3.12659	5.92345	5.76217	5.63442	5.43256	0.424027	0.470377	0.0152573	0.000959028	0.441028	1.34446	0.594724	0.115677	0	2	0	0	0	0	0	0	0	NaN	NaN	NaN	NaN	NaN	NaN	NaN	NaN	NaN	NaN	NaN	NaN	NaN	NaN	NaN
1135	Chr2	TAIR10	10237001	10238000	0	0.280987	-0.198262	-1.26972	-0.845879	-0.696033	0.726715	0.461679	-1.11484	6.19894	5.78682	5.61332	5.77384	0.24912	0.409132	7.7804e-05	0.00453525	0.441445	2.48643	0.0650093	0.0973082	1	1	1	0	0	0	0	0	1	AT2G24080	0	Chr2	10237604	10238779	-	NaN	protein_coding	Protein of unknown function (DUF295)	---	Protein of unknown function (DUF295); CONTAINS InterPro DOMAIN/s: Protein of unknown function DUF295 (InterPro:IPR005174); BEST Arabidopsis thaliana protein match is: Protein of unknown function (DUF295) (TAIR:AT1G27540.1); Has 263 Blast hits to 254 proteins in 6 species: Archae - 0; Bacteria - 0; Metazoa - 0; Fungi - 0; Plants - 263; Viruses - 0; Other Eukaryotes - 0 (source: NCBI BLink).	0	1	0	1
1995	Chr3	TAIR10	21562001	21563000	0	-1.02685	-0.582912	-0.151298	-1.06851	-0.347028	-0.396767	-0.345708	-1.24679	6.40742	6.07925	6.74753	6.28268	0.0340204	0.0598128	0.38049	1.15112e-05	0.443214	0.255989	0.784687	0.510408	1	1	0	0	0	0	0	0	0	AT3G58210	0	Chr3	21562442	21564067	-	1	protein_coding	TRAF-like family protein	---	TRAF-like family protein; CONTAINS InterPro DOMAIN/s: TRAF-like (InterPro:IPR008974), MATH (InterPro:IPR002083); BEST Arabidopsis thaliana protein match is: Arabidopsis phospholipase-like protein (PEARLI 4) with TRAF-like domain (TAIR:AT3G58270.2); Has 1155 Blast hits to 996 proteins in 134 species: Archae - 2; Bacteria - 3; Metazoa - 121; Fungi - 102; Plants - 866; Viruses - 0; Other Eukaryotes …	3.45943	0.0301061	0	1
1963	Chr3	TAIR10	20585001	20586000	0	0.243595	0.242034	-1.42726	-0.0765929	-0.102168	0.633854	0.760379	-2.18822	6.78593	6.45593	6.13409	6.77864	0.227719	0.269594	6.22444e-08	0.462776	0.443753	0.516068	0.21059	0.144689	0	2	0	1	1	0	1	0	1	NaN	NaN	NaN	NaN	NaN	NaN	NaN	NaN	NaN	NaN	NaN	NaN	NaN	NaN	NaN
2941	Chr5	TAIR10	16603001	16604000	0	0.151952	0.0700417	-1.34245	-1.3308	-1.01406	0.05772	-0.202118	-2.8372	6.01742	5.81972	5.46313	5.41158	0.417782	0.483633	7.29038e-05	5.81114e-05	0.445178	2.09231	0.357797	0.135194	0	1	0	0	0	0	0	0	0	AT5G41500	-2	Chr5	16604002	16605213	+	NaN	protein_coding	F-box and associated interaction domains-containing protein	---	F-box and associated interaction domains-containing protein; CONTAINS InterPro DOMAIN/s: F-box domain, cyclin-like (InterPro:IPR001810), F-box domain, Skp2-like (InterPro:IPR022364), F-box associated domain, type 1 (InterPro:IPR006527), F-box associated interaction domain (InterPro:IPR017451); BEST Arabidopsis thaliana protein match is: F-box and associated interaction domains-containing protein …	0	1	0	1
2155	Chr4	TAIR10	6942001	6943000	0	0.258249	0.621044	-2.40871	-1.42987	0.165229	0.675354	0.519806	-1.85687	4.56146	4.94628	3.46428	3.81689	0.413831	0.119855	0.000393328	0.0156579	0.445815	0.0885834	0.12943	1.2633	0	0	0	0	0	0	0	0	0	NaN	NaN	NaN	NaN	NaN	NaN	NaN	NaN	NaN	NaN	NaN	NaN	NaN	NaN	NaN
1814	Chr3	TAIR10	11902001	11903000	0	0.45832	0.155472	-1.92879	-0.703443	-0.361797	1.19916	0.715387	-2.04286	4.98136	4.95702	4.01003	4.50761	0.225334	0.456883	0.000633656	0.129354	0.446427	0.641472	0.0287376	0.321325	0	0	0	0	0	0	0	0	0	NaN	NaN	NaN	NaN	NaN	NaN	NaN	NaN	NaN	NaN	NaN	NaN	NaN	NaN	NaN
1295	Chr2	TAIR10	15499001	15500000	0	-0.835687	-0.704139	-0.916163	-1.59476	-0.174224	-0.320051	-1.25952	-1.8662	4.82326	4.78362	4.7726	4.34863	0.27614	0.141518	0.0391147	0.00098347	0.446927	0.283116	0.341694	0.803932	0	0	0	1	1	0	0	1	0	NaN	NaN	NaN	NaN	NaN	NaN	NaN	NaN	NaN	NaN	NaN	NaN	NaN	NaN	NaN
705	Chr1	TAIR10	24343001	24344000	0	0.176643	0.337194	-1.2553	-0.0559988	0.190798	0.46658	0.410293	-1.74294	6.04576	5.96548	5.52079	6.06536	0.390339	0.212987	0.000161567	0.487546	0.44936	0.097532	0.162752	1.80408	0	1	0	0	0	0	0	0	0	AT1G65483	0	Chr1	24342483	24343731	+	NaN	protein_coding	---	---	unknown protein; Has 5 Blast hits to 5 proteins in 2 species: Archae - 0; Bacteria - 0; Metazoa - 0; Fungi - 0; Plants - 5; Viruses - 0; Other Eukaryotes - 0 (source: NCBI BLink).	-0.263034	0.831812	-0.125531	1
2619	Chr5	TAIR10	3232001	3233000	0	0.179775	-0.318158	-1.69675	-1.25678	-1.14022	0.476452	0.275184	-2.62098	6.69721	6.15212	5.94858	6.13038	0.334216	0.25705	1.29494e-09	8.39858e-07	0.450721	14.481	0.214153	0.0486712	1	1	0	0	0	0	0	0	0	AT5G10280	0	Chr5	3232569	3234210	+	NaN	protein_coding	myb domain protein 92	Encodes a putative transcription factor (MYB92).	myb domain protein 92 (MYB92); CONTAINS InterPro DOMAIN/s: SANT, DNA-binding (InterPro:IPR001005), Homeodomain-like (InterPro:IPR009057), Myb, DNA-binding (InterPro:IPR014778), HTH transcriptional regulator, Myb-type, DNA-binding (InterPro:IPR017930), Homeodomain-related (InterPro:IPR012287), Myb transcription factor (InterPro:IPR015495); BEST Arabidopsis thaliana protein match is: myb domain pro…	0.25634	0.851048	-0.215729	0.773304
3164	Chr5	TAIR10	22849001	22850000	0	0.156397	0.0968484	-1.31833	-0.118492	-0.116335	0.41549	-0.0627038	-3.16442	6.74978	6.38901	6.1938	6.76532	0.364464	0.454951	3.63079e-07	0.416194	0.451469	4.41428	0.412004	0.0092631	1	2	0	0	0	0	0	0	0	AT5G56410	0	Chr5	22848508	22850331	-	NaN	protein_coding	Protein with RNI-like/FBD-like domains	---	Protein with RNI-like/FBD-like domains; CONTAINS InterPro DOMAIN/s: FBD (InterPro:IPR013596), F-box domain, Skp2-like (InterPro:IPR022364), FBD-like (InterPro:IPR006566), Leucine-rich repeat 2 (InterPro:IPR013101); BEST Arabidopsis thaliana protein match is: Protein with RNI-like/FBD-like domains (TAIR:AT5G62970.1); Has 1807 Blast hits to 1807 proteins in 277 species: Archae - 0; Bacteria - 0; Me…	0	1	0	1
172	Chr1	TAIR10	5878001	5879000	0	0.222589	-0.152858	-1.65089	-0.861686	-0.320766	0.591074	0.495544	-1.58264	5.12229	5.00928	4.39851	4.69347	0.406395	0.466407	0.000838344	0.0497363	0.451762	1.88114	0.0211204	0.458232	0	0	0	0	0	0	0	0	0	AT1G17200	0	Chr1	5878400	5880041	+	NaN	protein_coding	Uncharacterised protein family (UPF0497)	---	Uncharacterised protein family (UPF0497); CONTAINS InterPro DOMAIN/s: Uncharacterised protein family UPF0497, trans-membrane plant (InterPro:IPR006702), Uncharacterised protein family UPF0497, trans-membrane plant subgroup (InterPro:IPR006459); BEST Arabidopsis thaliana protein match is: Uncharacterised protein family (UPF0497) (TAIR:AT3G14380.1); Has 681 Blast hits to 681 proteins in 21 species:…	0.123468	0.729505	-0.0706517	0.762361
435	Chr1	TAIR10	17270001	17271000	0	0.249989	-0.075926	-2.11765	-0.984777	-1.00287	0.66386	0.48315	-2.74047	6.0557	5.74322	5.07986	5.5736	0.303472	0.485932	2.29678e-08	0.00194688	0.451898	1.36619	0.128256	0.00911222	1	1	0	0	0	0	0	0	0	AT1G46840	0	Chr1	17270185	17271706	+	NaN	protein_coding	F-box family protein	---	F-box family protein; CONTAINS InterPro DOMAIN/s: F-box domain, cyclin-like (InterPro:IPR001810), F-box domain, Skp2-like (InterPro:IPR022364), F-box associated domain, type 3 (InterPro:IPR013187), F-box associated interaction domain (InterPro:IPR017451); BEST Arabidopsis thaliana protein match is: F-box family protein (TAIR:AT1G46984.1); Has 1463 Blast hits to 1399 proteins in 43 species: Archae…	0	1	0	1
2157	Chr4	TAIR10	7076001	7077000	0	0.0595261	0.284613	-2.45604	-0.720809	-1.20111	0.159634	0.658548	-1.84671	5.84694	5.8324	4.80537	5.58935	0.4879	0.287206	3.30632e-09	0.0247743	0.45265	0.395631	0.141681	0.250169	0	1	0	0	0	0	0	0	0	AT4G11745	0	Chr4	7075826	7076680	-	NaN	protein_coding	Galactose oxidase/kelch repeat superfamily protein	---	Galactose oxidase/kelch repeat superfamily protein; CONTAINS InterPro DOMAIN/s: Galactose oxidase/kelch, beta-propeller (InterPro:IPR011043), Kelch related (InterPro:IPR013089), Kelch-type beta propeller (InterPro:IPR015915); BEST Arabidopsis thaliana protein match is: Galactose oxidase/kelch repeat superfamily protein (TAIR:AT4G11770.1); Has 1087 Blast hits to 1039 proteins in 91 species: Archae…	0	1	0	1
2178	Chr4	TAIR10	7546001	7547000	0	0.237601	-0.813894	-1.55411	0.00496533	-0.197318	0.632633	0.240397	-2.29333	5.23355	4.79834	4.54722	5.23303	0.387412	0.0910077	0.000939594	0.499944	0.452896	1.84479	0.192234	1.06268	0	0	0	0	0	0	0	0	0	AT4G12890	0	Chr4	7546377	7547641	+	NaN	protein_coding	Gamma interferon responsive lysosomal thiol (GILT) reductase family protein	---	Gamma interferon responsive lysosomal thiol (GILT) reductase family protein; FUNCTIONS IN: catalytic activity; INVOLVED IN: biological_process unknown; LOCATED IN: endomembrane system; EXPRESSED IN: 9 plant structures; EXPRESSED DURING: 4 anthesis, C globular stage, petal differentiation and expansion stage, E expanded cotyledon stage, D bilateral stage; CONTAINS InterPro DOMAIN/s: Gamma interfer…	0.308122	0.648705	-0.0703893	1
558	Chr1	TAIR10	20691001	20692000	0	-1.45558	-0.593315	-1.66736	-1.8453	-1.53315	-0.547434	-0.34769	-2.12367	5.04383	5.11814	4.78131	4.60787	0.0613017	0.16152	0.000101695	2.28227e-05	0.453842	0.261579	0.12043	0.0924507	0	1	0	0	0	0	0	0	0	AT1G55420	0	Chr1	20691775	20693952	-	NaN	protein_coding	Cysteine/Histidine-rich C1 domain family protein	---	embryo sac development arrest 11 (EDA11); FUNCTIONS IN: zinc ion binding; INVOLVED IN: megagametogenesis; LOCATED IN: chloroplast; CONTAINS InterPro DOMAIN/s: DC1 (InterPro:IPR004146), Zinc finger, PHD-type (InterPro:IPR001965), C1-like (InterPro:IPR011424); BEST Arabidopsis thaliana protein match is: Cysteine/Histidine-rich C1 domain family protein (TAIR:AT1G55380.1); Has 31248 Blast hits to 271…	1.96347	0.188614	0.137504	0.877614
459	Chr1	TAIR10	17819001	17820000	0	0.44969	0.481228	-2.9779	-0.841346	-0.908543	1.20414	-0.0978728	-3.56237	4.52804	4.77805	3.06344	3.97892	0.285491	0.233088	0.000121069	0.130821	0.455631	1.50277	0.0893934	0.0384447	0	1	0	0	0	0	0	0	0	NaN	NaN	NaN	NaN	NaN	NaN	NaN	NaN	NaN	NaN	NaN	NaN	NaN	NaN	NaN
665	Chr1	TAIR10	23433001	23434000	0	0.0346442	0.273316	-2.23022	-0.707089	0.0350963	0.0956252	0.235069	-3.66555	5.45626	5.53878	4.54143	5.20893	0.496845	0.329471	1.23439e-06	0.054235	0.461036	0.0749382	0.243532	1.10775	0	2	0	0	0	0	0	0	0	AT1G63200	0	Chr1	23433630	23434600	-	1	protein_coding	Cystatin/monellin superfamily protein	---	Cystatin/monellin superfamily protein; CONTAINS InterPro DOMAIN/s: Cystatin-related, plant (InterPro:IPR006525); BEST Arabidopsis thaliana protein match is: Cystatin/monellin superfamily protein (TAIR:AT1G63190.1); Has 85 Blast hits to 83 proteins in 2 species: Archae - 0; Bacteria - 0; Metazoa - 0; Fungi - 0; Plants - 85; Viruses - 0; Other Eukaryotes - 0 (source: NCBI BLink).	0	1	0.137504	1
2633	Chr5	TAIR10	3702001	3703000	0	-0.214858	-0.105272	-0.423097	-1.10515	0.200197	-0.0798125	-0.880773	-2.3786	6.11288	5.90995	6.12687	5.75494	0.45426	0.470136	0.124632	0.000180901	0.461425	0.788075	0.69847	1.44564	0	1	0	0	0	0	0	0	0	NaN	NaN	NaN	NaN	NaN	NaN	NaN	NaN	NaN	NaN	NaN	NaN	NaN	NaN	NaN
3235	Chr5	TAIR10	25079001	25080000	0	0.383118	0.489452	-1.50021	-0.921628	-0.879146	0.140139	0.118035	-2.78006	5.93918	5.88186	5.1964	5.41771	0.1695	0.0916335	5.19613e-05	0.00637818	0.46259	0.609394	0.299152	0.0236175	0	1	0	0	1	0	0	0	0	AT5G62470	0	Chr5	25078991	25081101	-	NaN	protein_coding	myb domain protein 96	Encodes a R2R3 type Myb transcription factor whose expression is strongly induced by abscisic acid. Mediates abscisic acid signaling during drought stress response.	myb domain protein 96 (MYB96); CONTAINS InterPro DOMAIN/s: SANT, DNA-binding (InterPro:IPR001005), Homeodomain-like (InterPro:IPR009057), Myb, DNA-binding (InterPro:IPR014778), HTH transcriptional regulator, Myb-type, DNA-binding (InterPro:IPR017930), Homeodomain-related (InterPro:IPR012287), Myb transcription factor (InterPro:IPR015495); BEST Arabidopsis thaliana protein match is: myb domain pro…	0.0449601	0.899438	-0.131772	0.566489
3022	Chr5	TAIR10	18781001	18782000	0	0.174475	0.0729064	-1.75773	-1.13916	-0.308715	0.476599	-1.04603	-4.48966	5.36504	5.3159	4.6099	4.82791	0.430055	0.487445	0.000113454	0.00596665	0.462618	1.15221	0.437432	0.574354	0	1	0	0	0	0	0	0	0	AT5G46295	-797	Chr5	18779796	18780205	-	NaN	protein_coding	---	---	unknown protein; BEST Arabidopsis thaliana protein match is: unknown protein (TAIR:AT1G06475.1); Has 30201 Blast hits to 17322 proteins in 780 species: Archae - 12; Bacteria - 1396; Metazoa - 17338; Fungi - 3422; Plants - 5037; Viruses - 0; Other Eukaryotes - 2996 (source: NCBI BLink).	1.55254	0.306027	1.39689	0.0910842
1520	Chr3	TAIR10	3074001	3075000	0	1.32007	1.25312	-1.40045	-0.417927	-0.0967725	0.47994	0.451082	-3.54788	5.56161	5.61957	4.41115	4.80332	2.53085e-05	4.67418e-05	0.00484423	0.278335	0.466218	0.470071	0.434147	0.626399	0	0	0	0	0	0	0	0	0	AT3G09990	0	Chr3	3072662	3075142	-	NaN	protein_coding	Nucleoside transporter family protein	---	Nucleoside transporter family protein; FUNCTIONS IN: nucleoside transmembrane transporter activity; INVOLVED IN: transport; LOCATED IN: membrane; CONTAINS InterPro DOMAIN/s: Delayed-early response protein/equilibrative nucleoside transporter (InterPro:IPR002259); BEST Arabidopsis thaliana protein match is: Major facilitator superfamily protein (TAIR:AT4G05120.1); Has 921 Blast hits to 872 protein…	0	1	0	1
2790	Chr5	TAIR10	8196001	8197000	0	0.344982	0.632456	-1.89326	-0.558839	-1.15017	0.950576	0.985566	-1.71798	6.35814	6.28686	5.43883	6.0476	0.15477	0.011742	1.53137e-08	0.0418163	0.466719	0.217966	0.0485633	0.346414	0	1	0	0	0	0	0	0	0	AT5G24180	0	Chr5	8195600	8197119	+	NaN	protein_coding	Lipase class 3-related protein	---	Lipase class 3-related protein; FUNCTIONS IN: triglyceride lipase activity; INVOLVED IN: lipid metabolic process; LOCATED IN: cellular_component unknown; CONTAINS InterPro DOMAIN/s: Lipase, class 3 (InterPro:IPR002921); BEST Arabidopsis thaliana protein match is: Lipase class 3-related protein (TAIR:AT5G24220.1); Has 1807 Blast hits to 1807 proteins in 277 species: Archae - 0; Bacteria - 0; Metaz…	0	1	0.137504	1
348	Chr1	TAIR10	11279001	11280000	0	0.0899538	0.0722138	-1.74462	0.0375719	-0.430785	0.24923	1.04123	-1.21148	5.52815	5.47191	4.81845	5.62655	0.47807	0.486292	3.55463e-05	0.495829	0.466833	0.868727	0.180474	1.19719	0	0	0	0	0	0	0	0	0	AT1G31520	0	Chr1	11278983	11279639	-	NaN	protein_coding	---	---	unknown protein; Has 2 Blast hits to 2 proteins in 1 species: Archae - 0; Bacteria - 0; Metazoa - 0; Fungi - 0; Plants - 2; Viruses - 0; Other Eukaryotes - 0 (source: NCBI BLink).	0	1	0	1
2473	Chr4	TAIR10	17118001	17119000	0	-0.382208	0.357696	-0.989489	-1.47759	-0.0955421	-0.139334	-1.30276	-3.72868	5.28048	5.53308	5.07598	4.75927	0.421624	0.245426	0.0127627	0.000409086	0.467476	1.7607	0.580808	0.879651	0	0	0	0	0	0	0	0	0	AT4G36170	0	Chr4	17113872	17119834	+	NaN	protein_coding	---	---	unknown protein; Has 2 Blast hits to 2 proteins in 1 species: Archae - 0; Bacteria - 0; Metazoa - 0; Fungi - 0; Plants - 2; Viruses - 0; Other Eukaryotes - 0 (source: NCBI BLink).	0	1	0.137504	1
593	Chr1	TAIR10	22123001	22124000	0	0.212163	0.101978	-2.20654	-0.549758	-0.347331	0.587379	0.547389	-2.26867	6.35473	6.06958	5.35026	6.11665	0.32122	0.459764	1.21564e-10	0.0402681	0.468117	0.683809	0.0138896	0.226154	0	0	0	0	0	0	0	0	0	AT1G60050	0	Chr1	22121550	22123702	-	NaN	protein_coding	Nodulin MtN21 /EamA-like transporter family protein	nodulin MtN21-like transporter family protein	Nodulin MtN21 /EamA-like transporter family protein; FUNCTIONS IN: molecular_function unknown; INVOLVED IN: biological_process unknown; LOCATED IN: endomembrane system, membrane; CONTAINS InterPro DOMAIN/s: Protein of unknown function DUF6, transmembrane (InterPro:IPR000620); BEST Arabidopsis thaliana protein match is: nodulin MtN21 /EamA-like transporter family protein (TAIR:AT1G70260.1); Has 12…	0	1	0.137504	1
525	Chr1	TAIR10	19622001	19623000	0	0.19224	0.682475	-2.25822	-0.548677	-0.0999844	0.536676	-0.114906	-3.23099	5.56239	5.76417	4.55489	5.31612	0.405389	0.0239008	7.84874e-07	0.118393	0.471238	1.39997	0.177279	0.69386	0	0	0	0	0	0	0	0	0	AT1G52695	0	Chr1	19621238	19623461	-	NaN	protein_coding	alpha/beta-Hydrolases superfamily protein	---	alpha/beta-Hydrolases superfamily protein; FUNCTIONS IN: hydrolase activity, hydrolase activity, acting on ester bonds; INVOLVED IN: metabolic process; LOCATED IN: cellular_component unknown; CONTAINS InterPro DOMAIN/s: Phospholipase/carboxylesterase (InterPro:IPR003140); BEST Arabidopsis thaliana protein match is: alpha/beta-Hydrolases superfamily protein (TAIR:AT1G52700.1); Has 1130 Blast hits …	0	1	0	1
1569	Chr3	TAIR10	4618001	4619000	0	-1.55574	-1.36032	-0.424813	-2.24706	-0.454319	-0.558607	-1.02791	-2.37528	5.0976	4.84173	5.45629	4.48767	0.0415109	0.0037005	0.207414	5.79064e-07	0.472049	0.139303	0.69707	0.664132	0	0	0	0	0	0	0	0	0	NaN	NaN	NaN	NaN	NaN	NaN	NaN	NaN	NaN	NaN	NaN	NaN	NaN	NaN	NaN
119	Chr1	TAIR10	4278001	4279000	0	-0.86168	-0.615361	-1.26743	-1.17413	-1.46321	-0.309113	0.388902	-1.03099	5.71259	5.50458	5.48597	5.47616	0.155309	0.102076	0.000168018	0.000313836	0.472767	4.47414	0.102958	0.109693	0	1	0	0	0	0	0	0	0	AT1G12570	0	Chr1	4277993	4280862	-	NaN	protein_coding	Glucose-methanol-choline (GMC) oxidoreductase family protein	---	Glucose-methanol-choline (GMC) oxidoreductase family protein; FUNCTIONS IN: aldehyde-lyase activity, oxidoreductase activity, acting on CH-OH group of donors, FAD binding; INVOLVED IN: alcohol metabolic process; LOCATED IN: endomembrane system; EXPRESSED IN: 17 plant structures; EXPRESSED DURING: 9 growth stages; CONTAINS InterPro DOMAIN/s: Glucose-methanol-choline oxidoreductase, N-terminal (Int…	-0.82103	0.155529	-0.176404	0.579608
1603	Chr3	TAIR10	6003001	6004000	0	-0.983823	-0.529431	-1.32864	-0.970355	-0.601142	-0.352021	-0.149862	-2.54638	6.59838	6.2399	6.35897	6.51626	0.0299134	0.0705736	5.09493e-08	1.59287e-05	0.47367	0.56042	0.314415	0.235243	1	1	0	0	0	0	0	0	0	AT3G17540	0	Chr3	6002783	6003973	+	NaN	protein_coding	F-box and associated interaction domains-containing protein	---	F-box and associated interaction domains-containing protein; CONTAINS InterPro DOMAIN/s: F-box domain, cyclin-like (InterPro:IPR001810), F-box domain, Skp2-like (InterPro:IPR022364), F-box associated domain, type 1 (InterPro:IPR006527), F-box associated interaction domain (InterPro:IPR017451); BEST Arabidopsis thaliana protein match is: F-box and associated interaction domains-containing protein …	0	1	0	1
514	Chr1	TAIR10	19373001	19374000	0	0.13832	0.746429	-1.50387	-0.630366	-0.281643	0.389224	0.24954	-2.80032	5.7232	5.9391	5.10248	5.46753	0.44284	0.00823486	8.88094e-05	0.060502	0.473812	0.497901	0.301347	0.383208	0	2	0	0	0	0	0	0	0	NaN	NaN	NaN	NaN	NaN	NaN	NaN	NaN	NaN	NaN	NaN	NaN	NaN	NaN	NaN
1320	Chr2	TAIR10	16358001	16359000	0	0.157336	0.307926	-1.64001	-1.73094	-0.566994	0.44428	-0.19665	-3.99413	5.4829	5.52967	4.79101	4.66147	0.437745	0.295449	0.000126935	5.45762e-05	0.475376	4.4544	0.41798	0.50696	0	1	0	0	0	0	0	0	0	AT2G39200	0	Chr2	16356148	16359813	-	0	protein_coding	Seven transmembrane MLO family protein	A member of a large family of seven-transmembrane domain proteins specific to plants, homologs of the barley mildew resistance locus o (MLO) protein. The Arabidopsis genome contains 15 genes encoding MLO proteins, with localization in plasma membrane. Phylogenetic analysis revealed four clades of closely-related AtMLO genes. ATMLO6 belongs to the clade IV, with AtMLO2, AtMLO3 and AtMLO12. The gen…	MILDEW RESISTANCE LOCUS O 12 (MLO12); FUNCTIONS IN: calmodulin binding; INVOLVED IN: defense response to fungus, incompatible interaction, response to cyclopentenone, leaf senescence, cell death, defense response; LOCATED IN: plasma membrane; EXPRESSED IN: 16 plant structures; EXPRESSED DURING: 7 growth stages; CONTAINS InterPro DOMAIN/s: Mlo-related protein (InterPro:IPR004326); BEST Arabidopsis…	-0.87317	0.126074	1.88154	3.37406e-13
1505	Chr3	TAIR10	2573001	2574000	0	-2.04983	-0.650446	-0.633072	-1.91377	-0.322226	-0.728634	-0.394971	-1.8923	5.01728	5.18597	5.39872	4.69856	0.00839429	0.120439	0.0764736	5.31815e-06	0.475855	0.244844	0.499026	0.712421	1	1	0	0	0	0	0	0	0	AT3G08490	0	Chr3	2573944	2575215	-	NaN	protein_coding	---	---	BEST Arabidopsis thaliana protein match is: Late embryogenesis abundant protein, group 2 (TAIR:AT3G24600.1); Has 161 Blast hits to 158 proteins in 15 species: Archae - 0; Bacteria - 0; Metazoa - 0; Fungi - 0; Plants - 161; Viruses - 0; Other Eukaryotes - 0 (source: NCBI BLink).	-0.657112	0.519983	-0.499571	0.465788
367	Chr1	TAIR10	11728001	11729000	0	0.321134	0.36881	-2.22448	-1.85495	-1.23316	0.910168	-0.829152	-5.42201	5.62684	5.60734	4.57111	4.66298	0.27111	0.225457	1.0105e-06	1.38623e-05	0.477607	2.61368	0.418279	0.201482	0	0	0	0	0	0	0	0	0	NaN	NaN	NaN	NaN	NaN	NaN	NaN	NaN	NaN	NaN	NaN	NaN	NaN	NaN	NaN
3017	Chr5	TAIR10	18592001	18593000	0	-1.47562	-1.00927	-0.55412	-2.10782	-0.198839	-0.522281	-1.66477	-2.24081	4.54613	4.56059	4.83129	3.97214	0.108523	0.0542021	0.189402	0.000111853	0.477647	0.245319	0.603914	0.828314	0	0	0	0	0	0	0	0	0	AT5G45830	-602	Chr5	18589482	18591400	-	1	protein_coding	delay of germination 1	Encodes DOG1 (DELAY OF GERMINATION 1). A quantitative trait locus involved in the control of seed dormancy. Belongs to a novel plant-specific gene family whose members include: DOG1-like 1-4 (DOGL1-4, At4g18660, At4g18680, At4g18690, At4g18650 respectively) and DOG1. DOG1 expression is seed-specific.	DELAY OF GERMINATION 1 (DOG1); BEST Arabidopsis thaliana protein match is: unknown protein (TAIR:AT4G18690.1); Has 412 Blast hits to 412 proteins in 33 species: Archae - 0; Bacteria - 0; Metazoa - 0; Fungi - 0; Plants - 412; Viruses - 0; Other Eukaryotes - 0 (source: NCBI BLink).	2.95174	1.48711e-05	-0.724366	0.369313
2132	Chr4	TAIR10	6095001	6096000	0	0.258283	0.240112	-0.857858	-2.69169	-0.418336	0.73479	-0.876452	-3.80219	5.72677	5.643	5.3575	4.37911	0.327101	0.35374	0.0175261	5.80154e-09	0.478866	1.7602	0.632096	0.731447	0	1	0	0	0	0	0	0	0	NaN	NaN	NaN	NaN	NaN	NaN	NaN	NaN	NaN	NaN	NaN	NaN	NaN	NaN	NaN
1342	Chr2	TAIR10	17028001	17029000	0	0.245418	0.184774	-0.375368	-1.43953	-0.508374	0.0857148	-0.249131	-2.20626	5.64256	5.55611	5.51287	4.92555	0.348351	0.412264	0.244727	0.00025771	0.479398	6.95842	0.70975	0.47852	0	1	0	0	1	0	0	0	0	AT2G40802	0	Chr2	17028304	17028405	-	NaN	protein_coding	---	---	unknown protein; Has 30201 Blast hits to 17322 proteins in 780 species: Archae - 12; Bacteria - 1396; Metazoa - 17338; Fungi - 3422; Plants - 5037; Viruses - 0; Other Eukaryotes - 2996 (source: NCBI BLink).	0.115477	1	-0.125531	1
1393	Chr2	TAIR10	18293001	18294000	0	0.144542	-0.150324	-2.22413	-0.616682	-0.733552	0.414869	0.322237	-2.16935	4.87709	4.85341	3.91985	4.60486	0.464454	0.470706	0.000118669	0.164525	0.481513	2.71723	0.0124738	0.0866844	0	0	0	0	0	0	0	0	0	AT2G44250	0	Chr2	18293457	18295536	+	0	protein_coding	Protein of Unknown Function (DUF239)	---	Protein of Unknown Function (DUF239); FUNCTIONS IN: molecular_function unknown; INVOLVED IN: biological_process unknown; LOCATED IN: endomembrane system; CONTAINS InterPro DOMAIN/s: Protein of unknown function DUF239, plant (InterPro:IPR004314); BEST Arabidopsis thaliana protein match is: Protein of Unknown Function (DUF239) (TAIR:AT2G44210.1); Has 35333 Blast hits to 34131 proteins in 2444 speci…	0	1	0.788496	0.200488
109	Chr1	TAIR10	4128001	4129000	0	-2.51456	-1.51128	-1.59063	-1.76624	-1.11928	-0.879242	0.57022	-1.03993	4.44938	4.4645	4.49348	4.30981	0.00788119	0.00471842	0.000886067	0.0002922	0.482139	2.21658	0.209507	0.224363	0	0	0	0	0	0	0	0	0	AT1G12170	0	Chr1	4128607	4129701	-	NaN	protein_coding	F-box family protein	---	F-box family protein; CONTAINS InterPro DOMAIN/s: F-box domain, cyclin-like (InterPro:IPR001810), F-box domain, Skp2-like (InterPro:IPR022364), F-box associated domain, type 1 (InterPro:IPR006527), F-box associated interaction domain (InterPro:IPR017451); BEST Arabidopsis thaliana protein match is: F-box and associated interaction domains-containing protein (TAIR:AT1G12190.1); Has 1693 Blast hits…	0	1	0	1
2142	Chr4	TAIR10	6546001	6547000	0	0.213343	0.393048	-1.93153	-1.00238	-1.37341	0.613227	0.578685	-2.82476	5.30849	5.41812	4.4515	4.8185	0.402605	0.226149	5.66801e-05	0.0165859	0.48262	0.190645	0.187878	0.156303	0	1	0	0	0	0	0	0	0	AT4G10596	0	Chr4	6546697	6546795	-	NaN	protein_coding	---	This gene encodes a small protein and has either evidence of transcription or purifying selection.	unknown protein; Has 30201 Blast hits to 17322 proteins in 780 species: Archae - 12; Bacteria - 1396; Metazoa - 17338; Fungi - 3422; Plants - 5037; Viruses - 0; Other Eukaryotes - 2996 (source: NCBI BLink).	0	1	0	1
1733	Chr3	TAIR10	9200001	9201000	0	0.193923	0.24909	-1.16103	-0.384267	-0.399096	0.558091	0.409391	-1.16199	6.52353	6.27859	6.02812	6.38156	0.329987	0.280352	2.85114e-05	0.113959	0.482972	0.242703	0.000414665	0.0189786	0	2	0	0	0	0	0	0	0	AT3G25260	0	Chr3	9199438	9202000	+	NaN	protein_coding	Major facilitator superfamily protein	---	Major facilitator superfamily protein; FUNCTIONS IN: transporter activity; INVOLVED IN: oligopeptide transport; LOCATED IN: membrane; EXPRESSED IN: embryo, flower; EXPRESSED DURING: 4 anthesis, C globular stage, petal differentiation and expansion stage; CONTAINS InterPro DOMAIN/s: Oligopeptide transporter (InterPro:IPR000109), Major facilitator superfamily, general substrate transporter (InterPr…	0	1	0.137504	1
2888	Chr5	TAIR10	15135001	15136000	0	0.49773	-0.374224	-2.44067	-0.551368	0.371998	1.43281	0.978184	-2.86942	5.17726	4.84929	3.93745	4.76405	0.170359	0.344297	1.87746e-05	0.185379	0.48386	2.23184	0.0807732	5.20588	0	0	0	0	0	0	0	0	0	AT5G37990	0	Chr5	15133737	15135500	-	1	protein_coding	S-adenosyl-L-methionine-dependent methyltransferases superfamily protein	---	S-adenosyl-L-methionine-dependent methyltransferases superfamily protein; FUNCTIONS IN: S-adenosylmethionine-dependent methyltransferase activity, methyltransferase activity; INVOLVED IN: biological_process unknown; LOCATED IN: endomembrane system; EXPRESSED IN: hypocotyl, root; CONTAINS InterPro DOMAIN/s: SAM dependent carboxyl methyltransferase (InterPro:IPR005299); BEST Arabidopsis thaliana pr…	-0.765535	0.247789	1.08246	0.0310449
1905	Chr3	TAIR10	18203001	18204000	0	-0.789638	-0.35325	-1.66572	-1.44047	-0.396803	-0.274789	-0.0436994	-3.68785	5.47202	5.42267	5.03982	5.07824	0.217794	0.30488	1.9565e-05	0.000109473	0.484597	0.783773	0.377857	0.56867	0	0	0	0	0	0	0	0	0	AT3G49110	0	Chr3	18200664	18203142	+	NaN	protein_coding	peroxidase CA	Class III peroxidase Perx33. Expressed in roots. Located in the cell wall. Involved in cell elongation. Expression activated by light. May play a role in generating H2O2 during defense response.	peroxidase CA (PRXCA); FUNCTIONS IN: peroxidase activity; INVOLVED IN: oxygen and reactive oxygen species metabolic process, response to light stimulus, defense response to bacterium, defense response to fungus, unidimensional cell growth; LOCATED IN: vacuole, plant-type cell wall; EXPRESSED IN: stem, root; CONTAINS InterPro DOMAIN/s: Haem peroxidase (InterPro:IPR010255), Plant peroxidase (InterP…	0.183035	0.64894	0.647826	0.00728991
2431	Chr4	TAIR10	15439001	15440000	0	-1.42274	-0.512131	-0.91384	-1.19482	-0.451887	-0.493731	-1.05186	-2.73155	5.52872	5.51666	5.61303	5.42118	0.0302181	0.16482	0.00533952	0.000321212	0.485255	0.34554	0.498906	0.451711	0	0	0	0	1	0	0	0	0	NaN	NaN	NaN	NaN	NaN	NaN	NaN	NaN	NaN	NaN	NaN	NaN	NaN	NaN	NaN
2424	Chr4	TAIR10	15229001	15230000	0	-1.81401	0.408882	-0.883238	-2.20949	-0.200528	-0.624351	-0.490491	-1.33848	4.02381	4.87444	4.24197	3.47313	0.100193	0.277431	0.0970479	0.000722545	0.488292	11.2974	0.205092	0.83428	0	1	0	0	0	0	0	0	0	AT4G31380	0	Chr4	15229785	15230718	+	NaN	protein_coding	FPF1-like protein 1	encodes a small protein with unknown function and is similar to flower promoting factor 1. This gene is not expressed in apical meristem after floral induction but is expressed in roots, flowers, and in low abundance, leaves.	FPF1-like protein 1 (FLP1); FUNCTIONS IN: molecular_function unknown; LOCATED IN: endomembrane system; BEST Arabidopsis thaliana protein match is: flowering promoting factor 1 (TAIR:AT5G24860.1); Has 122 Blast hits to 122 proteins in 14 species: Archae - 0; Bacteria - 0; Metazoa - 0; Fungi - 0; Plants - 122; Viruses - 0; Other Eukaryotes - 0 (source: NCBI BLink).	1.43238	0.0766942	-0.681178	0.351214
2326	Chr4	TAIR10	12101001	12102000	0	0.161114	0.192394	-1.84175	-0.58324	-0.325732	0.470747	0.000684359	-3.54271	6.04065	5.8951	5.24145	5.80446	0.407223	0.383759	3.15374e-07	0.0509605	0.488487	0.982731	0.316019	0.28392	0	1	0	0	0	0	0	0	0	AT4G23090	0	Chr4	12100391	12101483	-	NaN	protein_coding	---	---	unknown protein; Has 7 Blast hits to 7 proteins in 2 species: Archae - 0; Bacteria - 0; Metazoa - 0; Fungi - 0; Plants - 7; Viruses - 0; Other Eukaryotes - 0 (source: NCBI BLink).	0	1	0.847997	0.184933
2978	Chr5	TAIR10	17411001	17412000	0	0.193425	0.127347	-1.04425	-0.465665	-0.111799	0.567324	0.181836	-1.28172	6.72505	6.37134	6.28298	6.54746	0.310819	0.425534	4.00752e-05	0.043744	0.4902	0.175104	0.102184	0.614924	1	1	0	0	0	0	0	0	1	AT5G43360	0	Chr5	17409524	17411214	+	NaN	protein_coding	phosphate transporter 1;3	Encodes Pht1;3, a member of the Pht1 family of phosphate transporters which include: Pht1;1/At5g43350, Pht1;2/At5g43370, Pht1;3/At5g43360, Pht1;4/At2g38940, Pht1;5/At2g32830, Pht1;6/At5g43340, Pht1;7/At3g54700, Pht1;8/At1g20860, Pht1;9/At1g76430 (Plant Journal 2002, 31:341).	phosphate transporter 1;3 (PHT1;3); FUNCTIONS IN: phosphate transmembrane transporter activity, carbohydrate transmembrane transporter activity, inorganic phosphate transmembrane transporter activity, sugar:hydrogen symporter activity; INVOLVED IN: transport, phosphate transport, transmembrane transport; LOCATED IN: plasma membrane, membrane; EXPRESSED IN: root; CONTAINS InterPro DOMAIN/s: Major …	0.137504	1	0.137504	1
657	Chr1	TAIR10	23223001	23224000	0	-0.389331	-0.0907062	-1.1136	-1.97008	-0.768407	-0.133353	-1.05336	-3.26054	5.01337	5.11245	4.75501	4.24136	0.431643	0.487018	0.0121216	7.22905e-05	0.491618	0.842905	0.491048	0.439129	0	0	0	0	0	0	0	0	0	AT1G62710	0	Chr1	23223874	23226916	-	1	protein_coding	beta vacuolar processing enzyme	Encodes a vacuolar processing enzyme belonging to a novel group of cysteine proteases that is expressed specifically in seeds and is essential for the proper processing of storage proteins.	beta vacuolar processing enzyme (BETA-VPE); FUNCTIONS IN: cysteine-type endopeptidase activity; INVOLVED IN: proteolysis, response to salt stress, vacuolar protein processing; LOCATED IN: endomembrane system; EXPRESSED IN: 23 plant structures; EXPRESSED DURING: 13 growth stages; CONTAINS InterPro DOMAIN/s: Peptidase C13, legumain (InterPro:IPR001096); BEST Arabidopsis thaliana protein match is: g…	1.81046	0.00161808	0.461407	0.254269
1363	Chr2	TAIR10	17370001	17371000	0	-1.14292	-1.2967	-0.82273	-1.43579	-0.177489	-0.388388	-1.07877	-2.38089	5.42918	5.04351	5.4899	5.12714	0.0922484	0.00296778	0.0170528	8.6638e-05	0.493382	0.0918176	0.486678	0.780933	1	0	0	0	0	0	0	0	0	NaN	NaN	NaN	NaN	NaN	NaN	NaN	NaN	NaN	NaN	NaN	NaN	NaN	NaN	NaN
485	Chr1	TAIR10	18857001	18858000	0	0.266976	1.54195	-1.92257	-0.934931	-0.133698	0.0893622	-0.392867	-3.27583	3.75752	4.79134	2.90195	3.23675	0.445332	0.000182342	0.0231017	0.185814	0.49566	1.68087	0.260423	0.751183	0	0	0	0	0	0	0	0	0	NaN	NaN	NaN	NaN	NaN	NaN	NaN	NaN	NaN	NaN	NaN	NaN	NaN	NaN	NaN
2096	Chr4	TAIR10	1342001	1343000	0	-0.686968	0.354382	-0.492618	-1.40824	-0.318052	-0.232189	-0.630105	-2.29154	5.39384	5.67574	5.50155	4.98802	0.275556	0.231255	0.147482	0.000259101	0.495858	3.59665	0.646593	0.632253	0	0	0	0	0	0	0	0	0	AT4G03040	0	Chr4	1341083	1343140	+	NaN	protein_coding	---	---	BEST Arabidopsis thaliana protein match is: Polynucleotidyl transferase, ribonuclease H-like superfamily protein (TAIR:AT5G33330.1); Has 18 Blast hits to 18 proteins in 2 species: Archae - 0; Bacteria - 0; Metazoa - 0; Fungi - 0; Plants - 18; Viruses - 0; Other Eukaryotes - 0 (source: NCBI BLink).	0	1	0	1
559	Chr1	TAIR10	20759001	20760000	0	0.130494	-0.148788	-1.04272	-0.498818	-0.420925	0.390914	0.0111535	-1.0749	7.20567	6.63228	6.78804	7.0552	0.369697	0.408151	7.99648e-07	0.00939233	0.497547	1.17921	0.0152129	0.0848737	0	1	0	0	0	0	0	0	0	AT1G55570	0	Chr1	20757767	20760076	+	NaN	protein_coding	SKU5 similar 12	---	SKU5 similar 12 (sks12); FUNCTIONS IN: oxidoreductase activity, copper ion binding; INVOLVED IN: oxidation reduction; LOCATED IN: endomembrane system; EXPRESSED IN: 9 plant structures; EXPRESSED DURING: L mature pollen stage, M germinated pollen stage, 4 anthesis, C globular stage, petal differentiation and expansion stage; CONTAINS InterPro DOMAIN/s: Multicopper oxidase, type 3 (InterPro:IPR0117…	-0.485427	0.541256	-0.347923	0.690038
1649	Chr3	TAIR10	7315001	7316000	0	0.233312	0.125137	-1.30373	-0.691342	-0.43308	0.699664	0.501469	-1.72026	6.9644	6.53728	6.37431	6.65926	0.220987	0.419857	7.85556e-08	0.00150962	0.498784	0.598677	0.137831	0.230094	0	1	0	0	1	0	0	0	0	AT3G20880	0	Chr3	7313538	7315883	-	NaN	protein_coding	WIP domain protein 4	---	WIP domain protein 4 (WIP4); FUNCTIONS IN: sequence-specific DNA binding transcription factor activity, zinc ion binding, nucleic acid binding; INVOLVED IN: regulation of transcription; LOCATED IN: nucleus; EXPRESSED IN: central root cap of the primary root, quiescent center; EXPRESSED DURING: seedling growth; CONTAINS InterPro DOMAIN/s: Zinc finger, C2H2-like (InterPro:IPR015880), Zinc finger, C…	0	1	0	1
1040	Chr2	TAIR10	7720001	7721000	0	0.386556	-0.196645	-2.69622	-0.489605	-1.04621	1.16422	1.89887	-1.46181	4.90632	4.76323	3.60251	4.57444	0.29189	0.453753	2.55162e-05	0.25179	0.500823	1.2296	0.297018	0.362891	0	0	0	0	1	0	0	0	0	NaN	NaN	NaN	NaN	NaN	NaN	NaN	NaN	NaN	NaN	NaN	NaN	NaN	NaN	NaN
513	Chr1	TAIR10	19366001	19367000	0	0.209152	0.291389	-1.95824	-0.390536	-0.218259	0.632389	0.589257	-2.67181	5.76478	5.71628	4.89011	5.59376	0.375749	0.29249	1.59246e-06	0.206416	0.501738	0.337472	0.154185	0.283912	0	0	0	0	0	0	0	0	0	AT1G52070	0	Chr1	19364888	19366924	-	NaN	protein_coding	Mannose-binding lectin superfamily protein	---	Mannose-binding lectin superfamily protein; FUNCTIONS IN: molecular_function unknown; INVOLVED IN: biological_process unknown; LOCATED IN: endomembrane system; EXPRESSED IN: root; CONTAINS InterPro DOMAIN/s: Mannose-binding lectin (InterPro:IPR001229); BEST Arabidopsis thaliana protein match is: Mannose-binding lectin superfamily protein (TAIR:AT1G52060.1); Has 1736 Blast hits to 822 proteins in …	0	1	0	1
1902	Chr3	TAIR10	17996001	17997000	0	0.161287	0.359219	-1.86749	-2.30908	-0.154236	0.488928	-1.3362	-3.69817	4.87124	5.08813	4.07732	3.74411	0.456304	0.295122	0.000714696	8.97873e-05	0.502351	1.73893	0.329042	0.875484	0	0	0	0	0	0	0	0	0	NaN	NaN	NaN	NaN	NaN	NaN	NaN	NaN	NaN	NaN	NaN	NaN	NaN	NaN	NaN
2833	Chr5	TAIR10	9137001	9138000	0	0.17342	0.264157	-1.58034	-0.631582	-0.565415	0.530388	0.440677	-1.8902	6.50485	6.27971	5.81824	6.24927	0.360162	0.260717	7.86701e-08	0.0130622	0.505758	0.249734	0.0893367	0.0553702	0	1	0	0	0	0	0	0	0	AT5G26150	0	Chr5	9137461	9140099	-	1	protein_coding	protein kinase family protein	---	protein kinase family protein; FUNCTIONS IN: protein serine/threonine kinase activity, protein kinase activity, kinase activity, ATP binding; INVOLVED IN: protein amino acid phosphorylation, response to stress; LOCATED IN: cellular_component unknown; EXPRESSED IN: male gametophyte, flower, pollen tube; EXPRESSED DURING: L mature pollen stage, M germinated pollen stage, 4 anthesis; CONTAINS InterP…	0.115477	1	0	1
1925	Chr3	TAIR10	18909001	18910000	0	-0.0253554	0.397169	-0.799829	-1.26547	0.0880382	-0.0752262	-0.414655	-2.10218	6.17457	6.1656	5.95984	5.68943	0.499303	0.128316	0.00600382	2.43182e-05	0.505884	52.4245	0.449086	1.1515	0	2	0	0	1	0	0	0	0	AT3G50870	-990	Chr3	18910990	18912608	+	NaN	protein_coding	GATA type zinc finger transcription factor family protein	Encodes a GATA transcriptional regulator required to position the proembryo boundary in the early embryo. Regulates shoot apical meristem and flower development.	MONOPOLE (MNP); CONTAINS InterPro DOMAIN/s: Zinc finger, NHR/GATA-type (InterPro:IPR013088), Zinc finger, GATA-type (InterPro:IPR000679); BEST Arabidopsis thaliana protein match is: GATA transcription factor 19 (TAIR:AT4G36620.1); Has 2164 Blast hits to 2065 proteins in 231 species: Archae - 0; Bacteria - 0; Metazoa - 372; Fungi - 903; Plants - 779; Viruses - 0; Other Eukaryotes - 110 (source: NC…	0.0774045	0.940396	-0.545741	0.341876
940	Chr2	TAIR10	435001	436000	0	-2.01679	-0.336948	-1.60644	-2.35876	-0.353585	-0.66196	-0.879198	-2.83519	4.93474	5.25434	4.84133	4.38309	0.0119209	0.334986	0.000134015	4.0709e-07	0.506147	0.44661	0.27677	0.739823	0	1	0	1	1	1	0	0	0	AT2G01940	0	Chr2	432275	435077	+	NaN	protein_coding	C2H2-like zinc finger protein	May be involved in an early event in shoot gravitropism such as gravity perception and/or a signaling process subsequent to amyloplast sedimentation as a putative transcription factor in gravity-perceptive cells.	SHOOT GRAVITROPISM 5 (SGR5); CONTAINS InterPro DOMAIN/s: Zinc finger, C2H2-like (InterPro:IPR015880), Zinc finger, C2H2-type (InterPro:IPR007087); BEST Arabidopsis thaliana protein match is: indeterminate(ID)-domain 14 (TAIR:AT1G68130.1); Has 34856 Blast hits to 17366 proteins in 321 species: Archae - 1; Bacteria - 0; Metazoa - 32828; Fungi - 237; Plants - 754; Viruses - 1; Other Eukaryotes - 103…	0.901992	0.15169	0.106042	0.799264
2703	Chr5	TAIR10	5715001	5716000	0	0.134918	-0.0763726	-1.59039	-0.629209	-1.0812	0.413935	0.250485	-2.10336	6.36825	6.0248	5.69784	6.13031	0.417376	0.482755	2.29353e-07	0.0178749	0.506517	1.85596	0.138953	0.264569	0	1	0	0	0	0	0	0	1	AT5G17340	0	Chr5	5715624	5716268	-	NaN	protein_coding	Putative membrane lipoprotein	---	Putative membrane lipoprotein; FUNCTIONS IN: molecular_function unknown; INVOLVED IN: biological_process unknown; LOCATED IN: endomembrane system; EXPRESSED IN: petal, leaf whorl, sepal, flower; EXPRESSED DURING: 4 anthesis, petal differentiation and expansion stage; BEST Arabidopsis thaliana protein match is: Protein of unknown function (DUF1278) (TAIR:AT3G03272.1); Has 1807 Blast hits to 1807 p…	0	1	0	1
615	Chr1	TAIR10	22518001	22519000	0	-1.20583	-0.768893	-1.4062	-1.23414	-0.238307	-0.395039	-0.695371	-1.43337	5.08166	5.02239	4.88262	4.88825	0.11398	0.0846642	0.000765317	0.00221283	0.507103	0.0502795	0.00957526	0.677232	0	0	0	0	0	0	0	0	0	AT1G61110	0	Chr1	22516602	22518287	+	NaN	protein_coding	NAC domain containing protein 25	---	NAC domain containing protein 25 (NAC025); FUNCTIONS IN: sequence-specific DNA binding transcription factor activity; INVOLVED IN: multicellular organismal development, regulation of transcription; LOCATED IN: cellular_component unknown; EXPRESSED IN: 6 plant structures; EXPRESSED DURING: 4 anthesis, petal differentiation and expansion stage; CONTAINS InterPro DOMAIN/s: No apical meristem (NAM) p…	0.932886	0.110184	0.241008	0.83882
2186	Chr4	TAIR10	7722001	7723000	0	0.140114	0.175759	-1.24537	-0.488392	-0.308278	0.431144	0.242302	-1.87551	6.74164	6.42847	6.22888	6.58037	0.388489	0.363225	1.22022e-06	0.0322302	0.507676	0.158414	0.202039	0.226652	1	1	1	0	0	0	0	0	0	AT4G13260	0	Chr4	7721618	7723989	-	2	protein_coding	Flavin-binding monooxygenase family protein	Encodes YUC2. Catalyzes conversion of IPA (indole-3-pyruvic acid) to IAA (indole-3-acetic acid) in auxin biosynthesis pathway.	YUCCA2 (YUC2); FUNCTIONS IN: NADP or NADPH binding, oxidoreductase activity, FAD binding, flavin-containing monooxygenase activity; INVOLVED IN: auxin biosynthetic process; EXPRESSED IN: 24 plant structures; EXPRESSED DURING: 13 growth stages; CONTAINS InterPro DOMAIN/s: Pyridine nucleotide-disulphide oxidoreductase, class-II (InterPro:IPR000103), FAD-dependent pyridine nucleotide-disulphide oxid…	0.230298	0.715678	0.08092	0.832171
1095	Chr2	TAIR10	9335001	9336000	0	-0.271181	0.171109	-1.48647	-1.75654	-0.339428	-0.089211	-0.522391	-2.97947	5.78328	5.80146	5.3049	5.10619	0.442744	0.410951	3.04063e-05	1.39738e-06	0.50774	1.9855	0.334457	0.676759	1	1	0	0	0	0	0	0	0	AT2G21900	0	Chr2	9334149	9336222	-	NaN	protein_coding	WRKY DNA-binding protein 59	member of WRKY Transcription Factor; Group II-c	WRKY DNA-binding protein 59 (WRKY59); CONTAINS InterPro DOMAIN/s: DNA-binding WRKY (InterPro:IPR003657); BEST Arabidopsis thaliana protein match is: WRKY DNA-binding protein 51 (TAIR:AT5G64810.1); Has 3349 Blast hits to 2895 proteins in 189 species: Archae - 0; Bacteria - 0; Metazoa - 0; Fungi - 0; Plants - 3334; Viruses - 0; Other Eukaryotes - 15 (source: NCBI BLink).	-0.137504	1	0	1
1960	Chr3	TAIR10	20529001	20530000	0	-1.18454	-0.0169684	-1.18098	-2.56186	-1.29087	-0.384497	-0.538165	-2.86752	5.08344	5.34949	4.98741	4.22077	0.119823	0.499458	0.00366841	1.85154e-07	0.510545	0.942262	0.41679	0.330066	1	1	0	0	0	0	0	0	0	AT3G55370	0	Chr3	20527063	20529291	+	NaN	protein_coding	OBF-binding protein 3	Encodes a nuclear localized Dof domain containing transcription factor expressed primarily in roots. Responsive to salicylic acid. Transgenic overexpressors have yellow leaves and short, defective roots.	OBF-binding protein 3 (OBP3); CONTAINS InterPro DOMAIN/s: Zinc finger, Dof-type (InterPro:IPR003851); BEST Arabidopsis thaliana protein match is: Dof-type zinc finger DNA-binding family protein (TAIR:AT5G02460.1); Has 1095 Blast hits to 1086 proteins in 58 species: Archae - 0; Bacteria - 0; Metazoa - 0; Fungi - 0; Plants - 1086; Viruses - 0; Other Eukaryotes - 9 (source: NCBI BLink).	0.229823	0.740893	-0.191818	0.642562
460	Chr1	TAIR10	18026001	18027000	0	-1.22016	0.232187	-0.152145	-1.64577	0.907289	-0.393252	-1.5722	-1.8823	5.57661	5.85528	5.97651	5.19288	0.0592082	0.343689	0.425278	3.34022e-06	0.513157	1.34856	0.851268	3.46655	0	1	0	1	1	0	0	0	0	AT1G48742	0	Chr1	18026838	18027009	-	NaN	mirna	MIR157D; miRNA	Encodes a microRNA that targets several SPL family members, including SPL3,4, and 5. By regulating the expression of SPL3 (and probably also SPL4 and SPL5), this microRNA regulates vegetative phase change. MicroRNAs are regulatory RNAs with a mature length of ~21-nucleotides that are processed from hairpin precursors by Dicer-like enzymes. MicroRNAs can negatively regulate gene expression by atte…	---	0	1	0	1
1640	Chr3	TAIR10	7257001	7258000	0	0.120736	0.591443	-0.970338	-1.23744	-1.71622	0.0380796	0.339532	-2.32194	6.33639	6.33516	5.97154	5.80084	0.434035	0.016815	0.000706401	1.75381e-05	0.513982	0.270008	0.410786	0.162206	0	1	0	0	0	0	0	0	0	AT3G20760	0	Chr3	7256656	7259854	-	NaN	protein_coding	Nse4, component of Smc5/6 DNA repair complex	---	Nse4, component of Smc5/6 DNA repair complex; FUNCTIONS IN: molecular_function unknown; INVOLVED IN: biological_process unknown; LOCATED IN: cellular_component unknown; EXPRESSED IN: sperm cell, cotyledon; CONTAINS InterPro DOMAIN/s: Nse4 (InterPro:IPR014854); BEST Arabidopsis thaliana protein match is: Nse4, component of Smc5/6 DNA repair complex (TAIR:AT1G51130.1); Has 305 Blast hits to 304 pro…	0.113657	0.909806	0.0117772	1
1098	Chr2	TAIR10	9339001	9340000	0	-0.459468	-0.0395515	-2.02963	-0.782844	-0.200026	-0.147534	0.261269	-2.52416	5.21447	5.30134	4.52993	5.05883	0.395139	0.497158	1.25024e-05	0.0429845	0.51559	1.34464	0.108647	0.594184	0	0	0	0	0	0	0	0	0	NaN	NaN	NaN	NaN	NaN	NaN	NaN	NaN	NaN	NaN	NaN	NaN	NaN	NaN	NaN
2394	Chr4	TAIR10	14243001	14244000	0	-0.696271	0.107692	-2.10881	-1.83154	-1.04656	-0.223158	-0.414252	-3.64634	5.05467	5.29594	4.39279	4.43149	0.308208	0.473372	1.51192e-05	8.22634e-05	0.515694	1.71376	0.267251	0.272932	0	2	0	0	0	0	0	0	0	AT4G28850	-295	Chr4	14244295	14245957	+	NaN	protein_coding	xyloglucan endotransglucosylase/hydrolase 26	---	xyloglucan endotransglucosylase/hydrolase 26 (XTH26); FUNCTIONS IN: hydrolase activity, acting on glycosyl bonds, hydrolase activity, hydrolyzing O-glycosyl compounds, xyloglucan:xyloglucosyl transferase activity; INVOLVED IN: carbohydrate metabolic process, cellular glucan metabolic process; LOCATED IN: endomembrane system, apoplast, cell wall; EXPRESSED IN: root; CONTAINS InterPro DOMAIN/s: Xyl…	-0.137504	1	0.125531	1
2887	Chr5	TAIR10	15134001	15135000	0	0.381139	0.381838	-3.28967	0.131825	0.0156444	1.20319	1.26741	-2.84486	6.11858	5.96539	4.51374	6.12914	0.148745	0.167396	3.80768e-13	0.432037	0.518209	0.536304	0.0725329	0.777287	0	0	0	0	0	0	0	0	0	AT5G37990	0	Chr5	15133737	15135500	-	1	protein_coding	S-adenosyl-L-methionine-dependent methyltransferases superfamily protein	---	S-adenosyl-L-methionine-dependent methyltransferases superfamily protein; FUNCTIONS IN: S-adenosylmethionine-dependent methyltransferase activity, methyltransferase activity; INVOLVED IN: biological_process unknown; LOCATED IN: endomembrane system; EXPRESSED IN: hypocotyl, root; CONTAINS InterPro DOMAIN/s: SAM dependent carboxyl methyltransferase (InterPro:IPR005299); BEST Arabidopsis thaliana pr…	-0.765535	0.247789	1.08246	0.0310449
2479	Chr4	TAIR10	17314001	17315000	0	-1.83461	-0.299651	-1.69645	-1.59793	-1.03906	-0.581998	-0.208714	-2.55522	5.58203	5.72883	5.39068	5.37963	0.00394499	0.321982	7.38269e-07	1.40243e-06	0.518765	0.179589	0.20208	0.212097	1	0	0	0	1	0	0	0	0	AT4G36740	0	Chr4	17314559	17316374	-	0	protein_coding	homeobox protein 40	Encodes a homeodomain leucine zipper class I (HD-Zip I) protein.	homeobox protein 40 (HB40); FUNCTIONS IN: DNA binding, sequence-specific DNA binding transcription factor activity; INVOLVED IN: response to auxin stimulus, regulation of transcription, DNA-dependent; LOCATED IN: nucleus; EXPRESSED IN: ovule, fruit, root, flower; CONTAINS InterPro DOMAIN/s: Homeobox, conserved site (InterPro:IPR017970), Homeobox (InterPro:IPR001356), Helix-turn-helix motif, lambd…	0.758992	0.175465	1.46949	0.00154777
2089	Chr4	TAIR10	1188001	1189000	0	-0.548172	-0.780514	-2.1668	-1.86203	-0.913275	-0.174292	0.144496	-2.20408	5.6194	5.30153	4.88462	4.95655	0.320867	0.0542692	9.70508e-08	1.17641e-06	0.518944	1.45897	0.00853202	0.342103	0	0	0	0	0	0	0	0	0	AT4G02700	0	Chr4	1188983	1193611	+	1	protein_coding	sulfate transporter 3;2	---	sulfate transporter 3;2 (SULTR3;2); FUNCTIONS IN: sulfate transmembrane transporter activity; INVOLVED IN: sulfate transport, transport, transmembrane transport; LOCATED IN: integral to membrane, membrane; EXPRESSED IN: 12 plant structures; EXPRESSED DURING: 4 anthesis, C globular stage, petal differentiation and expansion stage; CONTAINS InterPro DOMAIN/s: Sulphate transporter (InterPro:IPR01154…	1.46503	0.0514171	0.329308	0.513578
1892	Chr3	TAIR10	17541001	17542000	0	0.193501	0.106823	-1.44763	-2.65959	-1.96304	0.61641	-0.446487	-2.44001	5.6232	5.52216	5.00386	4.32228	0.40059	0.469477	0.00028426	1.79406e-08	0.520881	1.63864	0.255396	0.150748	0	1	0	0	1	0	0	0	0	AT3G47600	0	Chr3	17539338	17541230	-	NaN	protein_coding	myb domain protein 94	Encodes a putative transcription factor (MYB94).	myb domain protein 94 (MYB94); CONTAINS InterPro DOMAIN/s: SANT, DNA-binding (InterPro:IPR001005), Homeodomain-like (InterPro:IPR009057), Myb, DNA-binding (InterPro:IPR014778), HTH transcriptional regulator, Myb-type, DNA-binding (InterPro:IPR017930), Homeodomain-related (InterPro:IPR012287), Myb transcription factor (InterPro:IPR015495); BEST Arabidopsis thaliana protein match is: myb domain pro…	-0.0215734	0.970939	-0.0215734	0.950954
1071	Chr2	TAIR10	8258001	8259000	0	0.122424	0.111024	-2.77573	-1.0765	-0.150266	0.394871	0.0180466	-3.37028	4.16702	4.44267	2.96625	3.65925	0.484089	0.484158	0.000588299	0.0861048	0.524649	0.709368	0.0967691	0.756254	0	0	0	0	0	0	0	0	0	AT2G19060	0	Chr2	8257000	8260545	+	NaN	protein_coding	SGNH hydrolase-type esterase superfamily protein	---	SGNH hydrolase-type esterase superfamily protein; FUNCTIONS IN: lipase activity, hydrolase activity, acting on ester bonds; INVOLVED IN: lipid metabolic process; LOCATED IN: endomembrane system; EXPRESSED IN: root; CONTAINS InterPro DOMAIN/s: Lipase, GDSL (InterPro:IPR001087), Esterase, SGNH hydrolase-type (InterPro:IPR013830); BEST Arabidopsis thaliana protein match is: GDSL-like Lipase/Acylhydr…	0	1	0	1
2499	Chr4	TAIR10	17866001	17867000	0	-1.36364	-0.887171	-1.23871	-1.96074	-0.642783	-0.424546	-1.36129	-2.84983	5.61653	5.40777	5.52876	5.11299	0.0322971	0.0227881	0.000191076	5.49263e-08	0.525753	0.211053	0.39425	0.50661	0	0	0	0	0	0	0	0	0	AT4G38030	0	Chr4	17863073	17866730	-	NaN	protein_coding	Rhamnogalacturonate lyase family protein	---	Rhamnogalacturonate lyase family protein; FUNCTIONS IN: lyase activity; LOCATED IN: endomembrane system; CONTAINS InterPro DOMAIN/s: Rhamnogalacturonate lyase (InterPro:IPR010325), Carbohydrate-binding-like fold (InterPro:IPR013784), Galactose-binding domain-like (InterPro:IPR008979); BEST Arabidopsis thaliana protein match is: Rhamnogalacturonate lyase family protein (TAIR:AT2G22620.1); Has 3020…	0	1	0.137504	1
1719	Chr3	TAIR10	8713001	8714000	0	0.111105	-0.130392	-2.82437	-1.66845	-1.09853	0.361494	-0.1198	-2.85734	5.28429	5.1849	4.04877	4.51303	0.471928	0.472221	1.87189e-07	0.000239092	0.52758	0.0426772	0.00580574	0.206122	0	0	0	0	0	0	0	0	0	AT3G24130	0	Chr3	8711663	8713424	-	NaN	protein_coding	Pectin lyase-like superfamily protein	---	Pectin lyase-like superfamily protein; FUNCTIONS IN: pectinesterase activity; INVOLVED IN: cell wall modification; LOCATED IN: endomembrane system, cell wall, plant-type cell wall; EXPRESSED IN: flower; CONTAINS InterPro DOMAIN/s: Pectinesterase, active site (InterPro:IPR018040), Pectin lyase fold/virulence factor (InterPro:IPR011050), Pectinesterase, catalytic (InterPro:IPR000070), Pectin lyase …	0	1	0	1
1156	Chr2	TAIR10	10827001	10828000	0	-1.30434	-0.3592	-0.832281	-1.33163	-1.28284	-0.401335	0.0028405	-2.15867	6.49594	6.29758	6.57564	6.31279	0.00497075	0.195699	0.000325244	2.19427e-08	0.530033	1.02168	0.443764	0.0186728	0	1	0	0	0	0	0	0	0	AT2G25440	0	Chr2	10826735	10829402	+	NaN	protein_coding	receptor like protein 20	---	receptor like protein 20 (RLP20); FUNCTIONS IN: kinase activity; INVOLVED IN: signal transduction; LOCATED IN: endomembrane system; EXPRESSED IN: 6 plant structures; EXPRESSED DURING: LP.06 six leaves visible, LP.04 four leaves visible, 4 anthesis, petal differentiation and expansion stage, LP.08 eight leaves visible; CONTAINS InterPro DOMAIN/s: Leucine-rich repeat (InterPro:IPR001611); BEST Arab…	-0.36257	0.596615	0.530515	0.291215
2369	Chr4	TAIR10	13353001	13354000	0	-1.9277	-1.01143	-1.67985	-2.0198	-0.196897	-0.591496	-0.784844	-1.90956	4.41966	4.5494	4.27683	4.00238	0.0458822	0.0546215	0.00114137	0.000189674	0.53083	0.126283	0.0640343	0.823093	0	0	0	0	0	0	0	0	0	AT4G26420	-433	Chr4	13350796	13352569	-	NaN	protein_coding	S-adenosyl-L-methionine-dependent methyltransferases superfamily protein	A member of the Arabidopsis SABATH methyltransferase gene family. Encodes GAMT1, a methyltransferase that uses S-adenosine-L-methionine (SAM) as a methyl donor to methylate the carboxyl group of GAs, resulting in the methyl esters of GAs (MeGAs). Expressed most highly in the siliques during seed development.	GAMT1; CONTAINS InterPro DOMAIN/s: SAM dependent carboxyl methyltransferase (InterPro:IPR005299); BEST Arabidopsis thaliana protein match is: gibberellic acid methyltransferase 2 (TAIR:AT5G56300.1); Has 916 Blast hits to 905 proteins in 122 species: Archae - 0; Bacteria - 67; Metazoa - 9; Fungi - 3; Plants - 723; Viruses - 0; Other Eukaryotes - 114 (source: NCBI BLink).	0.378512	0.67764	0	1
2120	Chr4	TAIR10	5425001	5426000	0	0.211004	-0.136465	-1.42726	-0.157446	-0.114983	0.694593	0.687665	-1.99658	5.86781	5.58847	5.24594	5.81485	0.365884	0.46026	9.29399e-05	0.422842	0.532823	1.48975	0.166376	0.157021	0	0	0	0	0	0	0	0	0	NaN	NaN	NaN	NaN	NaN	NaN	NaN	NaN	NaN	NaN	NaN	NaN	NaN	NaN	NaN
2764	Chr5	TAIR10	7511001	7512000	0	-0.0290538	0.171827	-1.46215	-0.500633	-0.349228	-0.0943913	0.584793	-2.40367	5.38995	5.45628	4.86961	5.26944	0.499469	0.42791	0.000481263	0.15656	0.538	0.544365	0.243675	0.178573	0	3	0	0	0	0	0	0	0	AT5G22600	0	Chr5	7510023	7511788	+	NaN	protein_coding	FBD / Leucine Rich Repeat domains containing protein	---	FBD / Leucine Rich Repeat domains containing protein; CONTAINS InterPro DOMAIN/s: FBD (InterPro:IPR013596), FBD-like (InterPro:IPR006566), Leucine-rich repeat 2 (InterPro:IPR013101); BEST Arabidopsis thaliana protein match is: F-box/RNI-like/FBD-like domains-containing protein (TAIR:AT5G22610.1); Has 687 Blast hits to 669 proteins in 15 species: Archae - 0; Bacteria - 0; Metazoa - 0; Fungi - 10; …	-0.137504	1	-0.137504	1
628	Chr1	TAIR10	22744001	22745000	0	0.216052	-0.25849	-2.4267	-1.08146	-0.613739	0.722511	-0.0100572	-3.88569	6.70958	6.1739	5.59197	6.21213	0.27805	0.320137	8.46574e-15	1.49506e-05	0.538463	0.932041	0.231205	0.276236	0	1	0	0	0	0	0	0	0	AT1G61630	0	Chr1	22744207	22746111	+	NaN	protein_coding	equilibrative nucleoside transporter 7	---	equilibrative nucleoside transporter 7 (ENT7); FUNCTIONS IN: nucleoside transmembrane transporter activity; INVOLVED IN: transport; LOCATED IN: plasma membrane; EXPRESSED IN: petal, leaf whorl, sperm cell, sepal, flower; EXPRESSED DURING: 4 anthesis, petal differentiation and expansion stage; CONTAINS InterPro DOMAIN/s: Delayed-early response protein/equilibrative nucleoside transporter (InterPro…	0	1	0	1
1696	Chr3	TAIR10	7897001	7898000	0	0.0910444	-0.103978	-1.1439	-0.651809	-0.735036	0.306212	0.284527	-1.36687	6.41884	6.0679	5.98392	6.19327	0.459171	0.467583	5.05459e-05	0.0119452	0.53892	2.12822	0.0888758	0.0600987	0	0	0	0	0	0	0	0	0	NaN	NaN	NaN	NaN	NaN	NaN	NaN	NaN	NaN	NaN	NaN	NaN	NaN	NaN	NaN
2048	Chr3	TAIR10	23269001	23270000	0	-0.913473	-0.268942	-0.824762	-1.43432	-0.656852	-0.273876	0.0528677	-1.61374	5.07537	5.18124	5.08398	4.70689	0.214817	0.392311	0.0385596	0.000783408	0.539585	1.50326	0.323815	0.372141	0	1	0	0	0	0	0	0	0	AT3G62960	0	Chr3	23268710	23269324	+	NaN	protein_coding	Thioredoxin superfamily protein	---	Thioredoxin superfamily protein; FUNCTIONS IN: electron carrier activity, protein disulfide oxidoreductase activity; INVOLVED IN: cell redox homeostasis; LOCATED IN: endomembrane system; EXPRESSED IN: 12 plant structures; EXPRESSED DURING: 4 anthesis, petal differentiation and expansion stage; CONTAINS InterPro DOMAIN/s: Glutaredoxin-like, plant II (InterPro:IPR011905), Thioredoxin fold (InterPro…	0.375509	0.787906	0	1
2746	Chr5	TAIR10	7344001	7345000	0	0.579359	0.559485	-2.47541	-1.35869	-0.568039	0.172517	0.548463	-2.57872	5.17772	5.26245	3.88101	4.31907	0.116199	0.118084	2.08957e-05	0.00596452	0.539667	0.00992963	0.0204477	0.410785	0	0	0	0	0	0	0	0	0	AT5G22150	0	Chr5	7342567	7345956	+	NaN	protein_coding	---	---	unknown protein; BEST Arabidopsis thaliana protein match is: unknown protein (TAIR:AT5G22160.1); Has 30201 Blast hits to 17322 proteins in 780 species: Archae - 12; Bacteria - 1396; Metazoa - 17338; Fungi - 3422; Plants - 5037; Viruses - 0; Other Eukaryotes - 2996 (source: NCBI BLink).	-0.137504	1	0.347923	0.690038
3184	Chr5	TAIR10	23416001	23417000	0	-0.955304	-0.510481	-1.36626	-2.0279	-0.85775	-0.285834	-1.53334	-3.6211	4.36765	4.54444	4.13696	3.69618	0.283972	0.285026	0.0130071	0.000812514	0.54027	0.500955	0.452293	0.405788	0	0	0	0	0	0	0	0	0	NaN	NaN	NaN	NaN	NaN	NaN	NaN	NaN	NaN	NaN	NaN	NaN	NaN	NaN	NaN
1134	Chr2	TAIR10	10236001	10237000	0	0.289337	0.311358	-1.8044	-2.07511	-0.602041	0.0856127	-0.0658162	-2.74332	4.94002	5.06782	4.11233	3.86596	0.367212	0.338342	0.000951739	0.000258702	0.540454	1.52368	0.206552	0.550649	0	0	0	0	0	0	0	0	0	AT2G24070	-526	Chr2	10231682	10235476	-	NaN	protein_coding	Family of unknown function (DUF566)	---	Family of unknown function (DUF566) ; LOCATED IN: chloroplast; EXPRESSED IN: shoot apex, inflorescence meristem, root, flower, carpel; EXPRESSED DURING: petal differentiation and expansion stage; CONTAINS InterPro DOMAIN/s: Protein of unknown function DUF566 (InterPro:IPR007573); BEST Arabidopsis thaliana protein match is: Family of unknown function (DUF566) (TAIR:AT4G30710.1); Has 35333 Blast hi…	-0.23816	0.872032	0.0911479	0.93736
1734	Chr3	TAIR10	9202001	9203000	0	0.0349061	0.0239059	-2.28789	-0.629895	-0.603199	0.119771	0.391738	-2.72946	5.33586	5.32231	4.395	5.12411	0.497053	0.498629	2.31836e-06	0.0948715	0.541655	0.880731	0.0880431	0.0216845	0	0	0	0	0	0	0	0	0	AT3G25265	0	Chr3	9202880	9203623	-	NaN	protein_coding	low-molecular-weight cysteine-rich 4	Encodes a member of a family of small,secreted, cysteine rich protein with sequence similarity to the PCP (pollen coat protein) gene family.	low-molecular-weight cysteine-rich 4 (LCR4); LOCATED IN: endomembrane system; CONTAINS InterPro DOMAIN/s: S locus-related glycoprotein 1 binding pollen coat (InterPro:IPR010851); BEST Arabidopsis thaliana protein match is: low-molecular-weight cysteine-rich 14 (TAIR:AT2G25344.1); Has 35333 Blast hits to 34131 proteins in 2444 species: Archae - 798; Bacteria - 22429; Metazoa - 974; Fungi - 991; Pl…	0	1	0	1
3219	Chr5	TAIR10	24583001	24584000	0	-0.588237	-0.935796	-2.05418	-0.996392	-0.72459	-0.17528	-0.5161	-2.26933	6.5152	5.92306	5.83085	6.31682	0.193293	0.00368131	1.2105e-12	3.71281e-05	0.542283	0.289466	0.0497858	0.158118	1	1	0	0	0	0	0	0	0	AT5G61120	0	Chr5	24582303	24585806	-	NaN	protein_coding	---	---	BEST Arabidopsis thaliana protein match is: Polynucleotidyl transferase, ribonuclease H-like superfamily protein (TAIR:AT5G61090.1); Has 125 Blast hits to 115 proteins in 16 species: Archae - 0; Bacteria - 0; Metazoa - 22; Fungi - 0; Plants - 102; Viruses - 0; Other Eukaryotes - 1 (source: NCBI BLink).	1.43063	0.283322	0.120294	0.885434
1727	Chr3	TAIR10	8997001	8998000	0	-1.32954	-0.506381	-0.490194	-1.00747	-0.531557	-0.394522	-0.129449	-0.810406	5.94364	5.81734	6.20238	5.91582	0.0190582	0.131397	0.0700766	0.000317536	0.542964	0.59469	0.246583	0.309632	0	2	1	0	0	0	0	0	1	AT3G24650	0	Chr3	8997370	9001063	+	1	protein_coding	AP2/B3-like transcriptional factor family protein	Homologous to the maize transcription factor Viviparous-1. Full length ABI3 protein binds to the highly conserved RY motif [DNA motif CATGCA(TG)], present in many seed-specific promoters, and the B3 domains of this transcription factor is necessary for the specific interaction with the RY element. Transcriptional activity of ABI3 requires the B3 DNA-binding domain and an activation domain. In add…	ABA INSENSITIVE 3 (ABI3); CONTAINS InterPro DOMAIN/s: Transcriptional factor B3 (InterPro:IPR003340); BEST Arabidopsis thaliana protein match is: AP2/B3-like transcriptional factor family protein (TAIR:AT3G26790.1); Has 4494 Blast hits to 2758 proteins in 300 species: Archae - 0; Bacteria - 132; Metazoa - 1104; Fungi - 405; Plants - 1155; Viruses - 101; Other Eukaryotes - 1597 (source: NCBI BLink…	2.1375	0.00533161	0.137504	1
3040	Chr5	TAIR10	19040001	19041000	0	0.154404	-0.3741	-1.21628	-0.906848	-0.616451	0.52579	0.82042	-0.918612	5.85119	5.49313	5.35887	5.4521	0.423816	0.279228	0.000588813	0.00661821	0.544398	2.66443	0.139563	0.190888	1	1	0	0	0	0	0	0	0	AT5G46900	0	Chr5	19039701	19040402	-	NaN	protein_coding	Bifunctional inhibitor/lipid-transfer protein/seed storage 2S albumin superfamily protein	---	Bifunctional inhibitor/lipid-transfer protein/seed storage 2S albumin superfamily protein; FUNCTIONS IN: lipid binding; INVOLVED IN: lipid transport; LOCATED IN: endomembrane system; CONTAINS InterPro DOMAIN/s: Bifunctional inhibitor/plant lipid transfer protein/seed storage (InterPro:IPR016140), Plant lipid transfer protein/seed storage/trypsin-alpha amylase inhibitor (InterPro:IPR003612), Plant…	0	1	0	1
1331	Chr2	TAIR10	16781001	16782000	0	-1.60384	-0.717009	-0.993375	-1.77018	-0.562608	-0.472747	-1.60485	-3.73711	4.8954	4.9791	4.99566	4.5314	0.0501767	0.111715	0.0151479	8.16574e-05	0.545212	0.382712	0.580257	0.518096	0	0	0	0	0	0	0	0	0	AT2G40180	-522	Chr2	16782522	16784147	+	0	protein_coding	phosphatase 2C5	Encodes PP2C5, a member of the PP2C family phosphatases. PP2C5 acts as a MAPK phosphatase that positively regulates seed germination, stomatal closure and ABA-inducible gene expression.	phosphatase 2C5 (PP2C5); CONTAINS InterPro DOMAIN/s: Protein phosphatase 2C, manganese/magnesium aspartate binding site (InterPro:IPR000222), Protein phosphatase 2C-related (InterPro:IPR001932), Protein phosphatase 2C (InterPro:IPR015655), Protein phosphatase 2C, N-terminal (InterPro:IPR014045); BEST Arabidopsis thaliana protein match is: Protein phosphatase 2C family protein (TAIR:AT1G07160.1); …	0.757143	0.508521	1.25964	0.017736
634	Chr1	TAIR10	22754001	22755000	0	0.0837594	0.27928	-1.2031	-1.64517	-1.2049	0.289725	0.185519	-2.58322	5.97258	5.91617	5.51955	5.2434	0.47423	0.283971	0.000313004	2.2044e-06	0.548533	0.200859	0.364693	0.154582	1	1	0	0	0	0	0	0	0	AT1G61660	0	Chr1	22753715	22756300	-	NaN	protein_coding	basic helix-loop-helix (bHLH) DNA-binding superfamily protein	---	basic helix-loop-helix (bHLH) DNA-binding superfamily protein; FUNCTIONS IN: DNA binding, sequence-specific DNA binding transcription factor activity; INVOLVED IN: regulation of transcription; LOCATED IN: nucleus; EXPRESSED IN: 22 plant structures; EXPRESSED DURING: 13 growth stages; CONTAINS InterPro DOMAIN/s: Helix-loop-helix DNA-binding domain (InterPro:IPR001092), Helix-loop-helix DNA-binding…	0.00480099	0.991253	0.321928	0.159231
1338	Chr2	TAIR10	16889001	16890000	0	0.214652	-0.020651	-2.0039	-1.31092	-0.528829	0.741376	0.48082	-2.01172	5.73022	5.53312	4.83141	5.09536	0.372718	0.499088	1.48266e-06	0.000429082	0.549799	1.08504	0.00194816	0.425571	0	1	0	0	0	0	0	0	0	AT2G40440	0	Chr2	16889212	16891292	-	NaN	protein_coding	BTB/POZ domain-containing protein	---	BTB/POZ domain-containing protein; CONTAINS InterPro DOMAIN/s: BTB/POZ (InterPro:IPR013069), BTB/POZ fold (InterPro:IPR011333), Kelch related (InterPro:IPR013089), BTB/POZ-like (InterPro:IPR000210); BEST Arabidopsis thaliana protein match is: BTB/POZ domain-containing protein (TAIR:AT2G40450.1); Has 178 Blast hits to 120 proteins in 24 species: Archae - 0; Bacteria - 0; Metazoa - 9; Fungi - 0; Pl…	-0.485427	0.541256	0.280108	0.7201
2465	Chr4	TAIR10	16687001	16688000	0	-2.79802	-2.32951	-2.02672	-3.71301	-0.529454	-0.813101	-2.34761	-2.24031	4.24656	4.00517	4.15387	3.20132	0.00574812	0.00015496	0.000145601	7.77244e-08	0.549972	0.00387001	0.0500785	0.750757	0	1	0	0	0	0	0	0	0	AT4G35060	-299	Chr4	16685720	16686703	-	1	protein_coding	Heavy metal transport/detoxification superfamily protein	---	Heavy metal transport/detoxification superfamily protein ; FUNCTIONS IN: metal ion binding; INVOLVED IN: metal ion transport; LOCATED IN: cellular_component unknown; EXPRESSED IN: 14 plant structures; EXPRESSED DURING: LP.06 six leaves visible, LP.04 four leaves visible, 4 anthesis, C globular stage, petal differentiation and expansion stage; CONTAINS InterPro DOMAIN/s: Heavy metal transport/deto…	1.08774	0.0461335	-0.182739	0.632684
1073	Chr2	TAIR10	8305001	8306000	0	0.329491	0.526322	-2.71568	-0.154723	-0.878436	1.14157	1.24875	-2.3234	4.99303	5.20037	3.70664	4.85987	0.330081	0.147114	1.04166e-05	0.459947	0.551288	0.406529	0.0778777	0.701844	0	0	0	0	0	0	0	0	0	AT2G19150	0	Chr2	8305100	8307444	+	NaN	protein_coding	Pectin lyase-like superfamily protein	---	Pectin lyase-like superfamily protein; FUNCTIONS IN: pectinesterase activity; INVOLVED IN: cell wall modification; LOCATED IN: endomembrane system, cell wall, plant-type cell wall; EXPRESSED IN: 6 plant structures; EXPRESSED DURING: LP.04 four leaves visible; CONTAINS InterPro DOMAIN/s: Pectin lyase fold/virulence factor (InterPro:IPR011050), Pectinesterase, catalytic (InterPro:IPR000070), Pectin…	0	1	0.137504	1
2538	Chr5	TAIR10	1024001	1025000	0	-0.296159	-0.213038	-1.40879	-1.14684	-0.828945	-0.0862418	-0.225847	-2.12311	5.96664	5.76682	5.52898	5.60518	0.42407	0.397906	1.89004e-05	0.000228116	0.551832	0.0293178	0.202363	0.161058	0	1	0	0	1	0	0	1	0	AT5G03840	0	Chr5	1024641	1025812	-	0	protein_coding	PEBP (phosphatidylethanolamine-binding protein) family protein	Controls inflorescence meristem identity. Involved in the floral initiation process. Ortholog of the Antirrhinum gene CENTRORADIALIS (CEN). Involved in protein trafficking to the protein storage vacuole.	TERMINAL FLOWER 1 (TFL1); CONTAINS InterPro DOMAIN/s: Phosphatidylethanolamine-binding, conserved site (InterPro:IPR001858), Phosphatidylethanolamine-binding protein PEBP (InterPro:IPR008914); BEST Arabidopsis thaliana protein match is: centroradialis (TAIR:AT2G27550.1); Has 1807 Blast hits to 1807 proteins in 277 species: Archae - 0; Bacteria - 0; Metazoa - 736; Fungi - 347; Plants - 385; Viruse…	0.504473	0.741107	0.246161	0.780042
1562	Chr3	TAIR10	4101001	4102000	0	-1.41519	-0.606861	-1.65581	-2.41543	-0.507788	-0.401379	-0.685514	-2.66431	5.05043	5.10954	4.78341	4.31922	0.0681417	0.154388	0.000112993	3.86347e-07	0.558705	0.0609534	0.233551	0.653029	1	0	0	0	0	0	0	0	0	NaN	NaN	NaN	NaN	NaN	NaN	NaN	NaN	NaN	NaN	NaN	NaN	NaN	NaN	NaN
594	Chr1	TAIR10	22124001	22125000	0	0.221301	0.0351959	-2.62163	-2.70358	0.00994223	0.789675	-0.333452	-4.08722	4.59351	4.69183	3.41168	3.23177	0.433803	0.498081	0.00014014	0.000121396	0.561093	1.24436	0.218523	1.00813	0	0	0	0	0	0	0	0	0	AT1G60050	-300	Chr1	22121550	22123702	-	NaN	protein_coding	Nodulin MtN21 /EamA-like transporter family protein	nodulin MtN21-like transporter family protein	Nodulin MtN21 /EamA-like transporter family protein; FUNCTIONS IN: molecular_function unknown; INVOLVED IN: biological_process unknown; LOCATED IN: endomembrane system, membrane; CONTAINS InterPro DOMAIN/s: Protein of unknown function DUF6, transmembrane (InterPro:IPR000620); BEST Arabidopsis thaliana protein match is: nodulin MtN21 /EamA-like transporter family protein (TAIR:AT1G70260.1); Has 12…	0	1	0.137504	1
1417	Chr2	TAIR10	18809001	18810000	0	-1.81651	0.0472653	-1.84412	-4.22932	-0.964914	-0.51022	-1.35239	-3.80911	5.68355	5.95774	5.4152	4.16324	0.00306951	0.49173	4.86655e-08	1.60612e-18	0.56191	1.07408	0.34771	0.628709	0	1	0	1	1	0	0	0	0	AT2G45660	0	Chr2	18807538	18811047	-	0	protein_coding	AGAMOUS-like 20	Controls flowering and is required for CO to promote flowering. It acts downstream of FT. Overexpression of (SOC1) AGL20 suppresses not only the late flowering of plants that have functional FRI and FLC alleles but also the delayed phase transitions during the vegetative stages of development. AGL20/SOC1 acts with AGL24 to promote flowering and inflorescence meristem identity.AGL20 upregulates ex…	AGAMOUS-like 20 (AGL20); FUNCTIONS IN: sequence-specific DNA binding transcription factor activity; INVOLVED IN: flower development, response to cold, positive regulation of flower development, maintenance of inflorescence meristem identity; LOCATED IN: nucleus; EXPRESSED IN: 22 plant structures; EXPRESSED DURING: 12 growth stages; CONTAINS InterPro DOMAIN/s: Transcription factor, MADS-box (Inter…	0.19885	0.619126	-0.0728789	0.777191
725	Chr1	TAIR10	24667001	24668000	0	0.271936	-0.477191	-1.22787	-0.320957	-0.58198	0.974077	1.11357	-0.447906	5.93023	5.46335	5.37327	5.76581	0.290901	0.197565	0.000482992	0.255028	0.562608	2.49187	0.465991	0.289724	0	0	0	0	0	0	0	0	1	AT1G66210	0	Chr1	24665629	24668783	-	NaN	protein_coding	Subtilisin-like serine endopeptidase family protein	---	Subtilisin-like serine endopeptidase family protein; FUNCTIONS IN: identical protein binding, serine-type endopeptidase activity; INVOLVED IN: proteolysis, negative regulation of catalytic activity; LOCATED IN: endomembrane system; EXPRESSED IN: 9 plant structures; EXPRESSED DURING: L mature pollen stage, M germinated pollen stage, 4 anthesis, C globular stage, petal differentiation and expansion…	-0.137504	1	0	1
1299	Chr2	TAIR10	15711001	15712000	0	-2.16825	-0.675454	-1.03751	-1.43714	-0.732507	-0.600913	-0.402815	-2.61841	6.15171	6.06124	6.35067	6.12872	2.18176e-05	0.0299293	2.89304e-05	1.42576e-08	0.566406	0.253319	0.432658	0.325067	1	2	0	0	0	0	0	0	0	NaN	NaN	NaN	NaN	NaN	NaN	NaN	NaN	NaN	NaN	NaN	NaN	NaN	NaN	NaN
2006	Chr3	TAIR10	21898001	21899000	0	0.174014	-0.216186	-1.51396	0.0377549	0.0474472	0.634214	0.213748	-2.82476	6.20026	5.82069	5.54988	6.27177	0.382669	0.391689	3.27981e-06	0.493429	0.567988	981.38	0.302254	0.111147	0	1	0	0	0	0	0	0	0	AT3G59240	0	Chr3	21898682	21900364	-	NaN	protein_coding	RNI-like superfamily protein	---	RNI-like superfamily protein; CONTAINS InterPro DOMAIN/s: FBD (InterPro:IPR013596), FBD-like (InterPro:IPR006566), Leucine-rich repeat 2 (InterPro:IPR013101); BEST Arabidopsis thaliana protein match is: F-box/RNI-like superfamily protein (TAIR:AT3G49150.1); Has 1728 Blast hits to 1678 proteins in 25 species: Archae - 0; Bacteria - 0; Metazoa - 0; Fungi - 0; Plants - 1728; Viruses - 0; Other Eukar…	0	1	0	1
1151	Chr2	TAIR10	10678001	10679000	0	-1.83665	-0.568183	-2.11377	0.0319531	0.274159	-0.505978	0.118254	-2.15805	4.28818	4.62639	3.91631	4.87034	0.0690813	0.239283	0.000272469	0.49821	0.568511	1.53247	0.0103699	0.786097	0	0	0	0	0	0	0	0	0	NaN	NaN	NaN	NaN	NaN	NaN	NaN	NaN	NaN	NaN	NaN	NaN	NaN	NaN	NaN
2243	Chr4	TAIR10	9067001	9068000	0	0.30127	0.279967	-2.54215	-0.460766	-0.0868434	1.09956	0.584208	-2.72659	4.68818	4.85584	3.50374	4.40917	0.377494	0.380691	0.000138452	0.290847	0.569057	0.351247	0.0350185	0.68533	1	0	0	0	0	0	0	0	0	AT4G16008	0	Chr4	9067830	9068512	+	0	protein_coding	---	---	unknown protein; FUNCTIONS IN: molecular_function unknown; INVOLVED IN: biological_process unknown; LOCATED IN: cellular_component unknown; Has 30201 Blast hits to 17322 proteins in 780 species: Archae - 12; Bacteria - 1396; Metazoa - 17338; Fungi - 3422; Plants - 5037; Viruses - 0; Other Eukaryotes - 2996 (source: NCBI BLink).	0.208865	0.78412	0.712104	0.0684871
2220	Chr4	TAIR10	8718001	8719000	0	-2.11417	-0.559637	-1.82201	-2.2951	-0.32258	-0.580775	-1.03471	-2.61133	4.88268	5.13557	4.71039	4.38654	0.00952696	0.180738	3.1622e-05	8.38013e-07	0.569411	0.298348	0.178121	0.754113	0	0	0	0	0	0	0	0	0	AT4G15280	-182	Chr4	8719182	8720618	+	NaN	protein_coding	UDP-glucosyl transferase 71B5	---	UDP-glucosyl transferase 71B5 (UGT71B5); FUNCTIONS IN: quercetin 3-O-glucosyltransferase activity, UDP-glycosyltransferase activity, transferase activity, transferring glycosyl groups; INVOLVED IN: metabolic process; LOCATED IN: cellular_component unknown; CONTAINS InterPro DOMAIN/s: UDP-glucuronosyl/UDP-glucosyltransferase (InterPro:IPR002213); BEST Arabidopsis thaliana protein match is: UDP-Gly…	0.527932	0.72945	0.840522	0.298849
1808	Chr3	TAIR10	11747001	11748000	0	0.339421	0.145553	-1.41951	-0.250165	-0.32911	1.24501	0.336594	-2.2253	6.58151	6.21558	5.88931	6.43349	0.132867	0.413848	8.607e-07	0.2611	0.570834	0.394592	0.221201	0.136755	0	1	0	0	0	0	0	0	0	NaN	NaN	NaN	NaN	NaN	NaN	NaN	NaN	NaN	NaN	NaN	NaN	NaN	NaN	NaN
2337	Chr4	TAIR10	12259001	12260000	0	-1.39659	-0.557386	-1.27527	-1.46634	-1.59492	-0.381097	-0.848044	-2.65733	5.50473	5.47357	5.40919	5.25415	0.0349959	0.139594	0.000231463	2.59794e-05	0.571889	0.207106	0.351617	0.042032	0	1	0	0	0	0	0	0	0	AT4G23496	-591	Chr4	12257676	12258411	-	NaN	protein_coding	SPIRAL1-like5	Belongs to a six-member gene family in Arabidopsis; all members share high sequence similarity in amino- and carboxy-terminal regions. Regulates cortical microtubule organization. Mutant plants exhibit altered patterns of root, leaf and petal growth as a result of defective anisotropic cell expansion.	SPIRAL1-like5 (SP1L5); BEST Arabidopsis thaliana protein match is: SPIRAL1-like2 (TAIR:AT1G69230.2); Has 30201 Blast hits to 17322 proteins in 780 species: Archae - 12; Bacteria - 1396; Metazoa - 17338; Fungi - 3422; Plants - 5037; Viruses - 0; Other Eukaryotes - 2996 (source: NCBI BLink).	0.886343	0.537748	-0.722466	0.153561
978	Chr2	TAIR10	1692001	1693000	0	0.201925	0.420416	-1.46409	-0.48909	-0.422898	0.744687	0.440447	-2.22244	5.37877	5.48966	4.75108	5.15295	0.407825	0.192617	0.000818332	0.179889	0.572165	0.0232145	0.205819	0.0727395	0	1	0	0	0	0	0	0	0	NaN	NaN	NaN	NaN	NaN	NaN	NaN	NaN	NaN	NaN	NaN	NaN	NaN	NaN	NaN
816	Chr1	TAIR10	26577001	26578000	0	-2.57612	-0.590992	-1.475	-1.33124	-0.931728	-0.698842	-0.255692	-2.30441	6.12201	6.15329	6.2115	6.25565	4.65596e-07	0.0502492	8.26395e-09	4.27617e-08	0.573572	0.396954	0.219571	0.176701	0	1	0	0	1	0	0	1	0	AT1G70510	0	Chr1	26576486	26582431	+	NaN	protein_coding	KNOTTED-like from Arabidopsis thaliana 2	A member of class I knotted1-like homeobox gene family (together with KNAT1). Similar to the knotted1 (kn1) homeobox gene of maize. KNAT2 acts synergistically with cytokinins and antagonistically with ethylene based on ectopic expression studies in different mutant backgrounds and hormone treatments. In addition, KNAT2 is negatively regulated by AS and YABBY genes. KNAT2 is strongly expressed in …	KNOTTED-like from Arabidopsis thaliana 2 (KNAT2); FUNCTIONS IN: sequence-specific DNA binding transcription factor activity; INVOLVED IN: response to ethylene stimulus, cytokinin mediated signaling pathway, specification of carpel identity; LOCATED IN: nucleus; EXPRESSED IN: 16 plant structures; EXPRESSED DURING: 6 growth stages; CONTAINS InterPro DOMAIN/s: KNOX2 (InterPro:IPR005541), ELK (InterP…	1.2402	0.209588	-0.380604	0.645532
1142	Chr2	TAIR10	10320001	10321000	0	-2.21582	0.0799911	-0.33775	-0.86593	-0.137847	-0.595205	-0.325394	-1.38569	5.54944	5.948	6.10566	5.80984	0.000500479	0.476831	0.208979	0.00319538	0.576932	1.66549	0.608758	0.726792	1	1	1	0	1	0	0	0	0	AT2G24260	0	Chr2	10319334	10322222	-	NaN	protein_coding	LJRHL1-like 1	Encodes a basic helix-loop-helix (bHLH) protein that regulates root hair development. One of the three Arabidopsis homologs of the Lotus japonicus ROOTHAIRLESS1 (LjRHL1) gene: At2g24260 (AtLRL1), At4g30980 (AtLRL2), and At5g58010 (AtLRL3).	LJRHL1-like 1 (LRL1); FUNCTIONS IN: DNA binding, sequence-specific DNA binding transcription factor activity; INVOLVED IN: root hair cell development, regulation of transcription; LOCATED IN: nucleus; EXPRESSED IN: 8 plant structures; EXPRESSED DURING: 4 anthesis, petal differentiation and expansion stage; CONTAINS InterPro DOMAIN/s: Helix-loop-helix DNA-binding domain (InterPro:IPR001092), Helix…	0.4975	0.540392	0.47478	0.29465
169	Chr1	TAIR10	5796001	5797000	0	0.121996	0.399424	-1.19902	-0.62598	-0.0825604	0.458809	0.205248	-1.66887	5.86675	5.88111	5.39846	5.62506	0.45047	0.161612	0.000593521	0.0489927	0.577917	0.320067	0.163947	0.769128	0	1	0	0	1	0	0	0	0	AT1G16950	0	Chr1	5796009	5796559	+	NaN	protein_coding	---	---	unknown protein; FUNCTIONS IN: molecular_function unknown; INVOLVED IN: biological_process unknown; LOCATED IN: endomembrane system; EXPRESSED IN: stamen; EXPRESSED DURING: 4 anthesis; Has 17 Blast hits to 17 proteins in 5 species: Archae - 0; Bacteria - 0; Metazoa - 0; Fungi - 0; Plants - 17; Viruses - 0; Other Eukaryotes - 0 (source: NCBI BLink).	0	1	0	1
3176	Chr5	TAIR10	23144001	23145000	0	-2.96002	-0.0952724	-1.13119	-1.95861	-1.62211	-0.78973	-0.272086	-1.94062	4.95986	5.55899	5.32679	4.85033	0.000137928	0.480611	0.00166514	8.14388e-07	0.579091	0.483946	0.263677	0.0940287	1	1	0	0	1	0	0	0	0	AT5G57130	0	Chr5	23144980	23149568	+	NaN	protein_coding	Clp amino terminal domain-containing protein	Encodes a member of an eight-gene family (SMAX1 and SMAX1-like) that has weak similarity to AtHSP101, a ClpB chaperonin required for thermotolerance.	Clp amino terminal domain-containing protein; INVOLVED IN: protein metabolic process; LOCATED IN: cellular_component unknown; EXPRESSED IN: 17 plant structures; EXPRESSED DURING: 9 growth stages; CONTAINS InterPro DOMAIN/s: Clp, N-terminal (InterPro:IPR004176); BEST Arabidopsis thaliana protein match is: Double Clp-N motif-containing P-loop nucleoside triphosphate hydrolases superfamily protein (…	0.273153	0.501732	0.0103327	0.97189
1635	Chr3	TAIR10	7237001	7238000	0	-1.09905	0.191349	-0.163182	-1.2481	-0.625	-0.291337	-0.14504	-2.31472	5.46399	5.72606	5.83047	5.2454	0.100844	0.396161	0.422561	0.000412176	0.581765	6.9633	0.868991	0.333012	0	1	0	0	0	0	0	0	0	AT3G20710	0	Chr3	7237911	7238999	-	NaN	protein_coding	F-box family protein	---	F-box family protein; CONTAINS InterPro DOMAIN/s: F-box domain, cyclin-like (InterPro:IPR001810), F-box domain, Skp2-like (InterPro:IPR022364), F-box associated domain, type 1 (InterPro:IPR006527), F-box associated interaction domain (InterPro:IPR017451); BEST Arabidopsis thaliana protein match is: F-box and associated interaction domains-containing protein (TAIR:AT3G20690.1); Has 1375 Blast hits…	0.137504	1	0.137504	1
802	Chr1	TAIR10	26166001	26167000	0	-1.73105	-1.14907	-0.926242	-1.67489	-0.545798	-0.458362	-1.05744	-2.7833	4.6981	4.6636	4.86494	4.4096	0.0483578	0.0226722	0.0311234	0.000383982	0.581824	0.0415664	0.500887	0.508901	0	0	0	0	0	0	0	0	0	NaN	NaN	NaN	NaN	NaN	NaN	NaN	NaN	NaN	NaN	NaN	NaN	NaN	NaN	NaN
2262	Chr4	TAIR10	9976001	9977000	0	-0.757103	-0.770628	-0.72031	-1.27303	-0.31243	-0.200706	-0.103482	-1.40331	5.38919	5.17036	5.40476	5.06881	0.243046	0.069269	0.0435344	0.000724667	0.582122	0.764979	0.321924	0.606647	1	1	0	0	0	0	0	0	0	AT4G17970	0	Chr4	9975408	9977722	+	NaN	protein_coding	aluminum-activated, malate transporter 12	Anion transporter involved in stomatal closure. Gene has 3 splicing variants.	aluminum-activated, malate transporter 12 (ALMT12); CONTAINS InterPro DOMAIN/s: Malate transporter, aliminium toerance (InterPro:IPR020966); BEST Arabidopsis thaliana protein match is: Aluminium activated malate transporter family protein (TAIR:AT5G46610.1); Has 747 Blast hits to 732 proteins in 202 species: Archae - 0; Bacteria - 352; Metazoa - 0; Fungi - 13; Plants - 354; Viruses - 0; Other Euk…	-0.685891	0.567938	0.334867	0.519673
1978	Chr3	TAIR10	21028001	21029000	0	-1.7956	-0.215943	-0.591846	-2.75659	-1.50406	-0.473758	0.0548331	-2.2247	4.46613	4.90854	4.81315	3.64776	0.0588187	0.439292	0.167507	4.80518e-06	0.582988	1.70182	0.580149	0.294114	0	1	0	0	0	0	0	0	0	NaN	NaN	NaN	NaN	NaN	NaN	NaN	NaN	NaN	NaN	NaN	NaN	NaN	NaN	NaN
1045	Chr2	TAIR10	7858001	7859000	0	0.0906436	0.330393	-1.16046	-1.55012	-0.822966	0.34731	0.174113	-2.78772	6.5258	6.36029	6.0815	5.85384	0.456539	0.170276	1.99252e-05	2.76627e-08	0.583394	0.308544	0.412364	0.306676	0	1	0	0	0	0	0	0	0	AT2G18080	0	Chr2	7857198	7859715	+	NaN	protein_coding	Serine carboxypeptidase S28 family protein	---	embryo sac development arrest 2 (EDA2); FUNCTIONS IN: serine-type peptidase activity; INVOLVED IN: proteolysis, megagametogenesis; LOCATED IN: endomembrane system; EXPRESSED IN: male gametophyte, flower, pollen tube; EXPRESSED DURING: L mature pollen stage, M germinated pollen stage, 4 anthesis; CONTAINS InterPro DOMAIN/s: Peptidase S28 (InterPro:IPR008758); BEST Arabidopsis thaliana protein matc…	0	1	0	1
1896	Chr3	TAIR10	17857001	17858000	0	0.12192	0.163486	-1.18061	0.0604031	-0.46877	0.467819	0.902177	-0.472731	6.16436	5.98975	5.70044	6.27301	0.439903	0.407728	0.000159301	0.483339	0.584547	0.691876	0.428669	1.30221	0	0	0	0	0	0	0	0	1	AT3G48230	0	Chr3	17855112	17858120	+	NaN	protein_coding	Protein of Unknown Function (DUF239)	---	Protein of Unknown Function (DUF239); FUNCTIONS IN: molecular_function unknown; INVOLVED IN: biological_process unknown; LOCATED IN: endomembrane system; CONTAINS InterPro DOMAIN/s: Protein of unknown function DUF239, plant (InterPro:IPR004314); BEST Arabidopsis thaliana protein match is: Protein of Unknown Function (DUF239) (TAIR:AT5G18460.1); Has 744 Blast hits to 694 proteins in 28 species: Ar…	0	1	0.125531	1
2241	Chr4	TAIR10	9050001	9051000	0	0.056984	-0.427146	-1.38748	-0.799925	-0.488432	0.220661	0.131943	-2.05603	6.46135	5.97149	5.92545	6.18018	0.483108	0.173554	1.1289e-06	0.00189823	0.585302	1.90683	0.194261	0.242151	0	1	0	0	0	0	0	0	0	AT4G15970	0	Chr4	9049328	9051370	+	NaN	protein_coding	Nucleotide-diphospho-sugar transferase family protein	---	Nucleotide-diphospho-sugar transferase family protein; CONTAINS InterPro DOMAIN/s: Nucleotide-diphospho-sugar transferase, predicted (InterPro:IPR005069); BEST Arabidopsis thaliana protein match is: unknown protein (TAIR:AT4G19970.1); Has 239 Blast hits to 233 proteins in 12 species: Archae - 0; Bacteria - 0; Metazoa - 0; Fungi - 0; Plants - 239; Viruses - 0; Other Eukaryotes - 0 (source: NCBI BL…	-0.137504	1	0.125531	1
1185	Chr2	TAIR10	11933001	11934000	0	0.0579992	-0.635136	-1.88445	-1.57092	-0.924822	0.224914	-0.0176194	-2.90633	5.56858	5.20018	4.80678	4.88006	0.490504	0.126968	7.86558e-06	8.01335e-05	0.585844	0.948923	0.213391	0.259089	1	0	0	0	0	0	0	0	0	AT2G28020	0	Chr2	11933702	11934060	+	NaN	protein_coding	---	---	BEST Arabidopsis thaliana protein match is: TATA-binding related factor (TRF) of subunit 20 of Mediator complex (TAIR:AT2G28230.1); Has 37 Blast hits to 37 proteins in 13 species: Archae - 0; Bacteria - 0; Metazoa - 0; Fungi - 0; Plants - 37; Viruses - 0; Other Eukaryotes - 0 (source: NCBI BLink).	0	1	0	1
1823	Chr3	TAIR10	13066001	13067000	0	0.356136	0.389353	-2.93991	-0.7874	-0.358037	1.37335	1.17273	-1.00776	5.20181	5.28069	3.79133	4.74366	0.285407	0.246357	7.32931e-07	0.0679899	0.587482	0.500852	0.489688	0.375502	0	1	0	0	0	0	0	0	0	NaN	NaN	NaN	NaN	NaN	NaN	NaN	NaN	NaN	NaN	NaN	NaN	NaN	NaN	NaN
2558	Chr5	TAIR10	1581001	1582000	0	-0.106727	0.374664	-1.36055	-1.4885	-0.986509	-0.410841	-0.278988	-2.95227	5.54535	5.69079	5.09062	4.9545	0.492077	0.209284	0.000452075	0.000129405	0.589864	6.69203	0.36924	0.202989	1	0	0	0	0	0	0	0	0	AT5G05340	-127	Chr5	1578951	1580875	-	NaN	protein_coding	Peroxidase superfamily protein	---	Peroxidase superfamily protein; FUNCTIONS IN: protein binding, peroxidase activity; INVOLVED IN: response to oxidative stress, oxidation reduction; LOCATED IN: apoplast, cell wall; EXPRESSED IN: 9 plant structures; EXPRESSED DURING: LP.04 four leaves visible, 4 anthesis, C globular stage, petal differentiation and expansion stage; CONTAINS InterPro DOMAIN/s: Haem peroxidase (InterPro:IPR010255), …	-0.752072	0.269627	-0.245112	0.708101
490	Chr1	TAIR10	18891001	18892000	0	0.19244	0.423258	-1.57093	-0.666012	0.0765305	0.750191	-0.507751	-4.46088	5.37029	5.48824	4.69604	5.06067	0.415971	0.190322	0.000408152	0.0844698	0.590443	11.2859	0.479278	1.26394	0	0	0	0	0	0	0	0	0	AT1G50960	0	Chr1	18889549	18891719	+	NaN	protein_coding	gibberellin 2-oxidase 7	Encodes a protein with gibberellin 2-oxidase activity which acts specifically on C-20 gibberellins. DDF1 binds to GA2OX7 and regulates its expression in response to salt stress.	gibberellin 2-oxidase 7 (GA2OX7); FUNCTIONS IN: C-20 gibberellin 2-beta-dioxygenase activity; INVOLVED IN: response to salt stress, gibberellin biosynthetic process, gibberellin metabolic process; LOCATED IN: chloroplast; EXPRESSED IN: central cell, hypocotyl; CONTAINS InterPro DOMAIN/s: Oxoglutarate/iron-dependent oxygenase (InterPro:IPR005123); BEST Arabidopsis thaliana protein match is: gibber…	0	1	0.263034	0.831812
14	Chr1	TAIR10	466001	467000	0	0.759951	-0.153716	0.0765853	-1.19832	-0.751985	0.194413	-0.539248	-1.65617	6.17999	5.60961	6.00755	5.33302	0.00326995	0.449429	0.477844	0.000476856	0.591342	0.557962	1.09836	0.229088	0	1	1	0	0	0	0	0	0	AT1G02340	0	Chr1	465718	467844	-	0	protein_coding	basic helix-loop-helix (bHLH) DNA-binding superfamily protein	Encodes a light-inducible, nuclear bHLH protein involved in phytochrome signaling. Mutants exhibit a long-hypocotyl phenotype only under far-red light but not under red light and are defective in other phytochrome A-related responses. Mutants also show blue light response defects. HFR1 interacts with COP1, co-localizes to the nuclear specks and is ubiquinated by COP1.	LONG HYPOCOTYL IN FAR-RED (HFR1); CONTAINS InterPro DOMAIN/s: Helix-loop-helix DNA-binding domain (InterPro:IPR001092), Helix-loop-helix DNA-binding (InterPro:IPR011598); BEST Arabidopsis thaliana protein match is: phytochrome interacting factor 3 (TAIR:AT1G09530.2); Has 1715 Blast hits to 1709 proteins in 90 species: Archae - 0; Bacteria - 0; Metazoa - 4; Fungi - 4; Plants - 1707; Viruses - 0; O…	1.87288	4.54983e-08	-0.395206	0.133267
2364	Chr4	TAIR10	13144001	13145000	0	-1.66068	-1.22489	-1.9289	-1.71222	-0.301094	-0.421459	-0.415521	-1.48645	4.29293	4.30848	3.96654	3.95807	0.0986073	0.0320176	0.000771874	0.00208138	0.595739	0.493996	0.129623	0.701594	0	0	0	0	0	0	0	0	0	AT4G25850	0	Chr4	13142164	13146930	+	0	protein_coding	OSBP(oxysterol binding protein)-related protein 4B	---	OSBP(oxysterol binding protein)-related protein 4B (ORP4B); FUNCTIONS IN: oxysterol binding; INVOLVED IN: steroid metabolic process; LOCATED IN: cellular_component unknown; CONTAINS InterPro DOMAIN/s: Oxysterol-binding protein (InterPro:IPR000648); BEST Arabidopsis thaliana protein match is: OSBP(oxysterol binding protein)-related protein 4A (TAIR:AT4G25860.1); Has 30201 Blast hits to 17322 prote…	0.791413	0.468209	2.48938	0.00044853
2029	Chr3	TAIR10	22897001	22898000	0	-0.945434	0.0813133	-0.431721	-2.05066	-0.332007	-0.238737	-0.566377	-2.04626	5.43307	5.61827	5.63309	4.77314	0.156803	0.48087	0.179	4.8017e-07	0.597795	1.3408	0.65208	0.721921	0	1	0	0	1	0	0	0	0	AT3G61850	0	Chr3	22895268	22897558	+	NaN	protein_coding	Dof-type zinc finger DNA-binding family protein	Zinc finger transcription factor of the Dof family involved in the control of seed germination.	dof affecting germination 1 (DAG1); CONTAINS InterPro DOMAIN/s: Zinc finger, Dof-type (InterPro:IPR003851); BEST Arabidopsis thaliana protein match is: Dof-type zinc finger DNA-binding family protein (TAIR:AT2G46590.2); Has 1148 Blast hits to 1141 proteins in 61 species: Archae - 0; Bacteria - 0; Metazoa - 2; Fungi - 0; Plants - 1095; Viruses - 0; Other Eukaryotes - 51 (source: NCBI BLink).	0.167042	0.789075	0.0214372	0.961472
3115	Chr5	TAIR10	21786001	21787000	0	-0.0696571	-0.117939	-1.33049	-1.10062	-0.541168	-0.274974	0.0942544	-2.2347	5.82243	5.65562	5.36882	5.42265	0.495894	0.468625	0.000147672	0.000972375	0.599236	9.78538	0.253764	0.341173	0	0	0	0	0	0	0	0	0	AT5G53635	0	Chr5	21785999	21787444	-	NaN	protein_coding	F-box/RNI-like/FBD-like domains-containing protein	---	F-box/RNI-like/FBD-like domains-containing protein; CONTAINS InterPro DOMAIN/s: F-box domain, cyclin-like (InterPro:IPR001810), FBD (InterPro:IPR013596), F-box domain, Skp2-like (InterPro:IPR022364), FBD-like (InterPro:IPR006566), Leucine-rich repeat 2 (InterPro:IPR013101); BEST Arabidopsis thaliana protein match is: F-box/RNI-like/FBD-like domains-containing protein (TAIR:AT5G25850.1).	0	1	0	1
652	Chr1	TAIR10	23216001	23217000	0	0.134033	0.130868	-1.29884	-0.234464	0.226092	0.538071	0.204318	-1.9256	6.83483	6.47929	6.29794	6.80586	0.390835	0.416162	1.96959e-07	0.23885	0.59937	0.217834	0.1945	72.2829	0	1	0	0	0	0	0	0	0	AT1G62700	0	Chr1	23216218	23217916	-	NaN	protein_coding	Arabidopsis NAC domain containing protein 26	Encodes a NAC-domain transcription factor. Expressed in the vascular tissue.	Arabidopsis NAC domain containing protein 26 (ANAC026); CONTAINS InterPro DOMAIN/s: No apical meristem (NAM) protein (InterPro:IPR003441); BEST Arabidopsis thaliana protein match is: NAC 007 (TAIR:AT1G12260.1); Has 3282 Blast hits to 3264 proteins in 98 species: Archae - 0; Bacteria - 0; Metazoa - 27; Fungi - 6; Plants - 3017; Viruses - 0; Other Eukaryotes - 232 (source: NCBI BLink).	0.31895	0.761657	0.377367	0.502103
638	Chr1	TAIR10	23003001	23004000	0	0.0702643	0.081651	-1.18576	-0.140105	-0.00502428	0.284119	0.249279	-2.00856	6.38238	6.13449	5.93812	6.42243	0.475867	0.472648	3.46646e-05	0.408454	0.60007	0.503494	0.257743	0.943767	0	1	0	0	0	0	0	0	0	AT1G62270	-499	Chr1	23004499	23005650	+	NaN	protein_coding	F-box and associated interaction domains-containing protein	---	F-box and associated interaction domains-containing protein; CONTAINS InterPro DOMAIN/s: F-box domain, cyclin-like (InterPro:IPR001810), F-box domain, Skp2-like (InterPro:IPR022364), F-box associated domain, type 1 (InterPro:IPR006527), F-box associated interaction domain (InterPro:IPR017451); BEST Arabidopsis thaliana protein match is: F-box and associated interaction domains-containing protein …	0	1	0	1
473	Chr1	TAIR10	18239001	18240000	0	0.12266	-0.171248	-2.97297	-1.71683	-0.475542	0.493818	-0.40094	-5.03425	5.16391	5.07094	3.85309	4.35967	0.468633	0.456462	2.9471e-07	0.000344533	0.600115	0.402837	0.257493	0.566701	0	1	0	0	0	0	0	0	0	AT1G49310	-635	Chr1	18237863	18238367	-	NaN	protein_coding	---	---	unknown protein; FUNCTIONS IN: molecular_function unknown; INVOLVED IN: biological_process unknown; LOCATED IN: endomembrane system; EXPRESSED IN: 9 plant structures; EXPRESSED DURING: LP.04 four leaves visible, petal differentiation and expansion stage; Has 11 Blast hits to 11 proteins in 6 species: Archae - 0; Bacteria - 0; Metazoa - 0; Fungi - 0; Plants - 11; Viruses - 0; Other Eukaryotes - 0 …	0.103836	0.951963	0.291463	0.702163
1663	Chr3	TAIR10	7471001	7472000	0	0.197768	0.324669	-0.597962	-1.75473	-1.16103	0.0485337	0.188915	-2.58635	5.90464	5.84373	5.68743	5.06069	0.37735	0.241647	0.0646067	2.13238e-06	0.60102	0.263302	0.624824	0.203756	0	1	0	0	0	0	0	0	0	NaN	NaN	NaN	NaN	NaN	NaN	NaN	NaN	NaN	NaN	NaN	NaN	NaN	NaN	NaN
2743	Chr5	TAIR10	7191001	7192000	0	-2.80248	-1.01076	-1.09601	-3.3961	-0.325302	-0.691626	-3.08664	-3.62908	4.54335	4.81037	4.89471	3.66479	0.00203674	0.0353357	0.00944323	8.06508e-09	0.604465	0.506879	0.536315	0.825616	0	1	0	0	1	0	0	0	0	AT5G21150	-239	Chr5	7192239	7198324	+	1	protein_coding	Argonaute family protein	AGO9-dependent sRNA silencing is crucial to specify cell fate in the Arabidopsis ovule. AGO9 is expressed in reproductive companion cells but not in the associated male or female gametes or their precursors. Therefore, AGO9 acts non-cell autonomously to silencing the activity of TEs activity in the female gametophyte.	ARGONAUTE 9 (AGO9); FUNCTIONS IN: siRNA binding; INVOLVED IN: ovule development, negative regulation of transposition; LOCATED IN: cytoplasm; EXPRESSED IN: 14 plant structures; EXPRESSED DURING: 8 growth stages; CONTAINS InterPro DOMAIN/s: Domain of unknown function DUF1785 (InterPro:IPR014811), Stem cell self-renewal protein Piwi (InterPro:IPR003165), Polynucleotidyl transferase, ribonuclease H …	5.70133	1.52642e-33	-0.561879	0.499686
1463	Chr3	TAIR10	659001	660000	0	-1.06402	-1.53553	-0.562836	-2.49276	0.180127	-0.262395	-1.5114	-2.87801	5.43688	4.9296	5.603	4.58634	0.114657	0.000649907	0.0904433	7.23415e-09	0.605269	0.00792428	0.673242	1.15678	0	0	0	0	0	0	0	0	0	NaN	NaN	NaN	NaN	NaN	NaN	NaN	NaN	NaN	NaN	NaN	NaN	NaN	NaN	NaN
1492	Chr3	TAIR10	1574001	1575000	0	-2.16228	-0.209887	-0.816005	-1.65029	-1.60501	-0.531391	0.246947	-1.53366	6.03774	6.17752	6.34344	5.90392	4.9226e-05	0.37238	0.00123327	1.51566e-09	0.605902	11.6955	0.305688	0.0139155	0	1	0	0	0	0	0	0	0	AT3G05450	0	Chr3	1573909	1576418	-	0	protein_coding	---	---	CONTAINS InterPro DOMAIN/s: Cystatin-related, plant (InterPro:IPR006525); BEST Arabidopsis thaliana protein match is: Cystatin/monellin superfamily protein (TAIR:AT3G05685.1); Has 2098 Blast hits to 1525 proteins in 202 species: Archae - 2; Bacteria - 561; Metazoa - 485; Fungi - 302; Plants - 191; Viruses - 20; Other Eukaryotes - 537 (source: NCBI BLink).	1	0.0987372	0.847997	0.184933
359	Chr1	TAIR10	11563001	11564000	0	-0.589381	-0.664687	-0.670746	-1.50135	-0.90767	-0.144907	0.0790273	-1.61277	6.16905	5.77864	6.15534	5.71022	0.236048	0.0531409	0.0142022	3.44506e-07	0.606966	1.27423	0.412893	0.246645	1	1	0	1	0	0	0	0	0	AT1G32140	0	Chr1	11562742	11564833	-	NaN	protein_coding	F-box family protein	---	F-box family protein; CONTAINS InterPro DOMAIN/s: F-box domain, cyclin-like (InterPro:IPR001810), F-box domain, Skp2-like (InterPro:IPR022364), F-box associated domain, type 1 (InterPro:IPR006527), F-box associated interaction domain (InterPro:IPR017451); BEST Arabidopsis thaliana protein match is: F-box family protein (TAIR:AT3G49510.1); Has 1675 Blast hits to 964 proteins in 17 species: Archae …	0	1	0	1
2615	Chr5	TAIR10	3226001	3227000	0	0.0805725	-0.797174	-1.37952	-1.02886	-0.565597	0.333306	0.371763	-2.38704	6.22119	5.61738	5.68114	5.80774	0.471743	0.0279716	9.70123e-06	0.000402939	0.60771	2.76076	0.267632	0.290909	1	1	0	0	0	0	0	0	0	NaN	NaN	NaN	NaN	NaN	NaN	NaN	NaN	NaN	NaN	NaN	NaN	NaN	NaN	NaN
2583	Chr5	TAIR10	2307001	2308000	0	-1.6952	-0.385453	-1.00619	-2.803	-1.09794	-0.413312	-1.13485	-3.98131	5.53364	5.62783	5.64055	4.69186	0.00917905	0.253562	0.00183115	9.8845e-12	0.608536	0.493575	0.596753	0.437315	1	0	0	0	0	0	0	0	0	NaN	NaN	NaN	NaN	NaN	NaN	NaN	NaN	NaN	NaN	NaN	NaN	NaN	NaN	NaN
565	Chr1	TAIR10	21100001	21101000	0	0.163076	0.0745504	-1.88212	-0.553005	-0.246304	0.673431	0.752496	-1.75241	5.47172	5.40228	4.66077	5.23605	0.433919	0.486081	2.33799e-05	0.125236	0.608647	0.817741	0.0357084	0.38467	0	0	0	0	0	0	0	0	0	AT1G56360	0	Chr1	21098603	21100842	-	NaN	protein_coding	purple acid phosphatase 6	---	purple acid phosphatase 6 (PAP6); FUNCTIONS IN: protein serine/threonine phosphatase activity, acid phosphatase activity; INVOLVED IN: biological_process unknown; LOCATED IN: endomembrane system; EXPRESSED IN: petal, leaf whorl, sepal, flower; EXPRESSED DURING: 4 anthesis, petal differentiation and expansion stage; CONTAINS InterPro DOMAIN/s: Purple acid phosphatase, N-terminal (InterPro:IPR01591…	0	1	0	1
2777	Chr5	TAIR10	8078001	8079000	0	-3.08885	-1.14682	-0.973804	-3.64337	-0.338998	-0.75211	-1.39982	-1.5719	4.62851	4.87004	5.10785	3.70167	0.000414873	0.0142849	0.0132313	2.77531e-10	0.608691	0.0994222	0.235129	0.830167	0	0	0	0	1	0	0	0	0	AT5G23940	0	Chr5	8076329	8079793	-	NaN	protein_coding	HXXXD-type acyl-transferase family protein	Encodes PERMEABLE LEAVES3 (PEL3), a putative acyl-transferase. Mutation in this locus results in altered trichome phenotype (trcichomes become tangled during leaf expansion). Additional phenotype includes altered cuticle layer.	PERMEABLE LEAVES3 (PEL3); FUNCTIONS IN: transferase activity, transferring acyl groups other than amino-acyl groups, transferase activity; INVOLVED IN: epidermis morphogenesis, localization, trichome morphogenesis, cutin biosynthetic process, embryo development ending in seed dormancy; LOCATED IN: cytoplasm; EXPRESSED IN: 21 plant structures; EXPRESSED DURING: 7 growth stages; CONTAINS InterPro D…	-0.0950317	0.736745	-0.334106	0.0887112
3225	Chr5	TAIR10	24843001	24844000	0	-3.10984	-0.613993	-1.07187	-2.14029	-0.772453	-0.75599	-1.13979	-2.37252	5.5676	5.8227	5.99072	5.4201	5.13918e-07	0.0695844	0.000149498	2.68402e-11	0.609202	0.300151	0.377831	0.469926	0	2	0	1	1	0	0	0	0	AT5G61850	-295	Chr5	24844295	24846933	+	NaN	protein_coding	floral meristem identity control protein LEAFY (LFY)	Encodes transcriptional regulator that promotes the transition to flowering.Involved in floral meristem development. LFY is involved in the regulation of AP3 expression, and appears to bring the F-box protein UFO to the AP3 promoter. Amino acids 46-120 define a protein domain that mediates self-interaction.	LEAFY (LFY); CONTAINS InterPro DOMAIN/s: Floricaula/leafy protein (InterPro:IPR002910); Has 1807 Blast hits to 1807 proteins in 277 species: Archae - 0; Bacteria - 0; Metazoa - 736; Fungi - 347; Plants - 385; Viruses - 0; Other Eukaryotes - 339 (source: NCBI BLink).	0.760812	0.604082	-0.469485	0.446571
522	Chr1	TAIR10	19557001	19558000	0	0.0704938	-0.106384	-2.31024	-2.82704	0.175808	0.295249	0.210371	-1.84156	4.72343	4.78389	3.76359	3.38026	0.492178	0.485798	0.000154036	2.0457e-05	0.611175	2.98861	0.11294	1.13348	0	0	0	0	0	0	0	0	0	AT1G52490	0	Chr1	19556218	19559011	-	NaN	protein_coding	---	---	CONTAINS InterPro DOMAIN/s: F-box domain, cyclin-like (InterPro:IPR001810), F-box domain, Skp2-like (InterPro:IPR022364), F-box associated domain, type 3 (InterPro:IPR013187), F-box associated interaction domain (InterPro:IPR017451); BEST Arabidopsis thaliana protein match is: F-box and associated interaction domains-containing protein (TAIR:AT1G32420.1); Has 1577 Blast hits to 1056 proteins in 3…	-0.137504	1	-0.137504	1
2549	Chr5	TAIR10	1490001	1491000	0	0.0653096	-0.676287	-0.557298	-1.70386	-0.406154	0.273886	-0.527841	-3.25792	5.56896	5.17964	5.44161	4.81024	0.487987	0.108043	0.111679	2.77619e-05	0.61131	0.123486	0.708226	0.615605	0	1	0	0	0	0	0	0	0	AT5G05050	-639	Chr5	1491639	1493457	+	NaN	protein_coding	Cysteine proteinases superfamily protein	---	Cysteine proteinases superfamily protein; FUNCTIONS IN: cysteine-type peptidase activity; INVOLVED IN: proteolysis; LOCATED IN: cellular_component unknown; CONTAINS InterPro DOMAIN/s: Peptidase C1A, papain (InterPro:IPR013128), Peptidase C1A, papain C-terminal (InterPro:IPR000668); Has 1807 Blast hits to 1807 proteins in 277 species: Archae - 0; Bacteria - 0; Metazoa - 736; Fungi - 347; Plants - …	0	1	0	1
1906	Chr3	TAIR10	18204001	18205000	0	-1.15043	-0.333841	-0.815315	-2.15809	-0.149589	-0.278232	-1.03947	-3.66188	5.82072	5.76534	5.88092	5.16881	0.0528928	0.285526	0.00645006	8.42017e-10	0.611357	0.514564	0.636076	0.87111	0	0	0	0	0	0	0	0	0	AT3G49115	-775	Chr3	18205775	18205975	+	NaN	protein_coding	---	This gene encodes a small protein and has either evidence of transcription or purifying selection.	unknown protein; Has 30201 Blast hits to 17322 proteins in 780 species: Archae - 12; Bacteria - 1396; Metazoa - 17338; Fungi - 3422; Plants - 5037; Viruses - 0; Other Eukaryotes - 2996 (source: NCBI BLink).	0	1	0	1
3126	Chr5	TAIR10	22017001	22018000	0	0.0752581	-0.182109	-1.13105	-0.40593	-0.341759	0.316686	0.231002	-1.79366	5.96833	5.69665	5.55419	5.86302	0.47915	0.426512	0.000629746	0.158007	0.612848	8.11724	0.22671	0.0860571	1	1	0	0	0	0	0	0	0	AT5G54230	0	Chr5	22016250	22017933	-	NaN	protein_coding	myb domain protein 49	Encodes a putative transcription factor (MYB49).	myb domain protein 49 (MYB49); CONTAINS InterPro DOMAIN/s: SANT, DNA-binding (InterPro:IPR001005), Homeodomain-like (InterPro:IPR009057), Myb, DNA-binding (InterPro:IPR014778), HTH transcriptional regulator, Myb-type, DNA-binding (InterPro:IPR017930), Homeodomain-related (InterPro:IPR012287), Myb transcription factor (InterPro:IPR015495); BEST Arabidopsis thaliana protein match is: MYB-like 102 (…	0.263034	0.831812	0.137504	1
256	Chr1	TAIR10	8300001	8301000	0	-1.71048	-0.165259	-1.05283	-2.21032	-0.309899	-0.405675	-1.13569	-3.88708	5.87093	5.98411	5.95407	5.33746	0.00292275	0.426168	0.000242161	2.24022e-11	0.617176	0.747089	0.573979	0.754669	0	3	0	0	0	1	0	0	0	AT1G23380	0	Chr1	8297291	8302651	-	NaN	protein_coding	KNOTTED1-like homeobox gene 6	homeodomain transcription factor KNAT6, belonging to class I of KN transcription factor family (which also includes KNAT1 and KNAT2). Expression is increased in as and bop1 leaf mutants.	KNOTTED1-like homeobox gene 6 (KNAT6); FUNCTIONS IN: DNA binding, transcription activator activity, sequence-specific DNA binding transcription factor activity; INVOLVED IN: meristem maintenance; LOCATED IN: nucleus; EXPRESSED IN: 10 plant structures; EXPRESSED DURING: 4 anthesis, F mature embryo stage, petal differentiation and expansion stage, E expanded cotyledon stage, D bilateral stage; CONT…	0.149304	0.815245	-0.228397	0.545771
2622	Chr5	TAIR10	3253001	3254000	0	0.418708	1.11824	-1.3723	0.231553	-0.223074	1.77673	2.13521	1.6076	8.13495	7.85444	7.40286	8.22431	0.00134337	3.96538e-16	2.08647e-16	0.0728648	0.618002	0.312392	12.5578	43.3844	0	0	0	0	0	0	0	0	1	AT5G10340	0	Chr5	3253122	3255045	+	NaN	protein_coding	F-box family protein	---	F-box family protein; CONTAINS InterPro DOMAIN/s: F-box domain, cyclin-like (InterPro:IPR001810), F-box domain, Skp2-like (InterPro:IPR022364), F-box associated domain, type 1 (InterPro:IPR006527), F-box associated interaction domain (InterPro:IPR017451); BEST Arabidopsis thaliana protein match is: F-box and associated interaction domains-containing protein (TAIR:AT2G34280.1); Has 1807 Blast hits…	-0.540568	0.442068	-0.0931094	1
640	Chr1	TAIR10	23018001	23019000	0	0.078351	-0.629841	-1.07205	-0.622725	-0.364652	0.336334	-0.146301	-1.77288	6.2177	5.68896	5.82662	6.00837	0.473301	0.075425	0.000356848	0.0249324	0.619133	0.624613	0.246516	0.261903	0	2	0	0	0	0	0	0	0	AT1G62300	0	Chr1	23016683	23019279	-	0	protein_coding	WRKY family transcription factor	Encodes a transcription factor WRKY6. Regulates Phosphate1 (Pho1) expression in response to low phosphate (Pi) stress.	WRKY6; CONTAINS InterPro DOMAIN/s: DNA-binding WRKY (InterPro:IPR003657); BEST Arabidopsis thaliana protein match is: WRKY family transcription factor (TAIR:AT4G04450.1); Has 3824 Blast hits to 3363 proteins in 295 species: Archae - 0; Bacteria - 33; Metazoa - 119; Fungi - 43; Plants - 3509; Viruses - 0; Other Eukaryotes - 120 (source: NCBI BLink).	0.0627951	0.908128	1.35449	7.53971e-07
257	Chr1	TAIR10	8301001	8302000	0	-0.891687	-0.0658203	-1.1657	-1.50089	-0.547423	-0.208747	-0.447646	-2.25005	6.4149	6.28602	6.23393	6.03955	0.0651958	0.484619	5.81854e-06	9.15961e-09	0.62174	0.746531	0.317645	0.465944	0	1	0	0	0	0	0	0	0	AT1G23380	0	Chr1	8297291	8302651	-	NaN	protein_coding	KNOTTED1-like homeobox gene 6	homeodomain transcription factor KNAT6, belonging to class I of KN transcription factor family (which also includes KNAT1 and KNAT2). Expression is increased in as and bop1 leaf mutants.	KNOTTED1-like homeobox gene 6 (KNAT6); FUNCTIONS IN: DNA binding, transcription activator activity, sequence-specific DNA binding transcription factor activity; INVOLVED IN: meristem maintenance; LOCATED IN: nucleus; EXPRESSED IN: 10 plant structures; EXPRESSED DURING: 4 anthesis, F mature embryo stage, petal differentiation and expansion stage, E expanded cotyledon stage, D bilateral stage; CONT…	0.149304	0.815245	-0.228397	0.545771
795	Chr1	TAIR10	25994001	25995000	0	0.293623	0.293529	-1.11463	0.00960787	-0.0789023	0.0676196	0.0844365	-1.90924	6.87704	6.53201	6.34949	6.88942	0.148026	0.19189	6.48068e-06	0.499343	0.622183	0.550293	0.262952	1.31527	0	1	0	0	0	0	0	0	1	AT1G69150	0	Chr1	25993659	25995212	-	1	protein_coding	Cysteine/Histidine-rich C1 domain family protein	---	Cysteine/Histidine-rich C1 domain family protein; CONTAINS InterPro DOMAIN/s: DC1 (InterPro:IPR004146), C1-like (InterPro:IPR011424); BEST Arabidopsis thaliana protein match is: Cysteine/Histidine-rich C1 domain family protein (TAIR:AT3G43890.1); Has 1775 Blast hits to 646 proteins in 23 species: Archae - 0; Bacteria - 0; Metazoa - 2; Fungi - 0; Plants - 1755; Viruses - 0; Other Eukaryotes - 18 (…	1.24101	0.0200739	0.241008	0.83882
3060	Chr5	TAIR10	20086001	20087000	0	0.0551905	-0.453456	-0.878658	-1.99142	-0.854377	0.240388	-0.967792	-4.19779	5.96367	5.58173	5.68083	5.07578	0.488713	0.201228	0.00614774	5.03444e-08	0.622349	0.3624	0.654087	0.399832	0	2	0	0	1	0	0	0	0	NaN	NaN	NaN	NaN	NaN	NaN	NaN	NaN	NaN	NaN	NaN	NaN	NaN	NaN	NaN
982	Chr2	TAIR10	1696001	1697000	0	0.0779986	0.0300445	-1.68181	-2.17476	-0.768685	0.33902	0.250276	-2.59705	5.71761	5.59962	5.04113	4.72049	0.481138	0.497378	1.59094e-05	1.47339e-07	0.622936	0.780076	0.213998	0.478021	1	1	0	0	0	0	0	0	0	AT2G04840	-9	Chr2	1697009	1698240	+	NaN	protein_coding	Protein of unknown function (DUF295)	---	Protein of unknown function (DUF295); CONTAINS InterPro DOMAIN/s: Protein of unknown function DUF295 (InterPro:IPR005174); BEST Arabidopsis thaliana protein match is: Protein of unknown function (DUF295) (TAIR:AT2G04810.1); Has 244 Blast hits to 244 proteins in 8 species: Archae - 0; Bacteria - 0; Metazoa - 0; Fungi - 0; Plants - 244; Viruses - 0; Other Eukaryotes - 0 (source: NCBI BLink).	-0.192645	0.855536	-0.192645	0.855536
1622	Chr3	TAIR10	6677001	6678000	0	0.0839616	-0.305577	-0.952162	-1.89362	-0.230061	0.365156	-1.11096	-3.20801	5.48435	5.27072	5.15927	4.61918	0.481402	0.358324	0.0136849	1.23325e-05	0.623328	0.569361	0.542509	0.784076	0	0	0	0	1	0	0	0	0	AT3G19270	-482	Chr3	6673727	6676520	-	NaN	protein_coding	cytochrome P450, family 707, subfamily A, polypeptide 4	Encodes a protein with ABA 8'-hydroxylase activity, involved in ABA catabolism. Member of the CYP707A gene family.	cytochrome P450, family 707, subfamily A, polypeptide 4 (CYP707A4); CONTAINS InterPro DOMAIN/s: Cytochrome P450 (InterPro:IPR001128), Cytochrome P450, E-class, group I (InterPro:IPR002401), Cytochrome P450, conserved site (InterPro:IPR017972); BEST Arabidopsis thaliana protein match is: cytochrome P450, family 707, subfamily A, polypeptide 1 (TAIR:AT4G19230.1); Has 34460 Blast hits to 34219 prote…	-0.813988	0.513901	-0.539366	0.400582
1288	Chr2	TAIR10	15202001	15203000	0	0.0921894	-0.223106	-2.66805	-0.407087	-0.157044	0.400667	0.325011	-0.632591	4.51784	4.56791	3.37841	4.36863	0.488443	0.448314	0.000126413	0.331426	0.623368	5.27521	0.61706	0.444813	0	0	0	1	0	0	0	0	0	AT2G36260	0	Chr2	15202646	15203703	+	NaN	protein_coding	Iron-sulphur cluster biosynthesis family protein	---	Iron-sulphur cluster biosynthesis family protein; FUNCTIONS IN: iron-sulfur cluster binding, structural molecule activity; INVOLVED IN: iron-sulfur cluster assembly; LOCATED IN: mitochondrion; CONTAINS InterPro DOMAIN/s: FeS cluster biogenesis (InterPro:IPR000361), FeS cluster insertion (InterPro:IPR016092); BEST Arabidopsis thaliana protein match is: Iron-sulphur cluster biosynthesis family prot…	-0.125531	1	-0.125531	1
1881	Chr3	TAIR10	17054001	17055000	0	0.083767	0.00240255	-2.09872	-0.186911	-0.29722	0.364695	0.422955	-3.31487	5.66163	5.54099	4.78273	5.65415	0.479117	0.499984	6.82069e-07	0.40476	0.623644	0.984076	0.22473	0.228796	0	1	0	0	0	0	0	0	0	AT3G46370	0	Chr3	17051955	17055514	+	NaN	protein_coding	Leucine-rich repeat protein kinase family protein	---	Leucine-rich repeat protein kinase family protein; FUNCTIONS IN: protein serine/threonine kinase activity, kinase activity, ATP binding; INVOLVED IN: transmembrane receptor protein tyrosine kinase signaling pathway, protein amino acid phosphorylation; LOCATED IN: cellular_component unknown; CONTAINS InterPro DOMAIN/s: Protein kinase, ATP binding site (InterPro:IPR017441), Protein kinase, catalyti…	-0.625725	0.355418	0.212081	0.5462
153	Chr1	TAIR10	4978001	4979000	0	-1.42075	-0.714536	-1.14501	-1.99868	-0.275538	-0.329828	-0.646426	-2.26567	5.53472	5.43208	5.50731	5.02488	0.0301024	0.0651882	0.000663942	7.84994e-08	0.623891	0.0501196	0.328766	0.758353	0	0	0	0	0	0	0	0	0	AT1G14549	0	Chr1	4978794	4978907	-	NaN	protein_coding	---	---	unknown protein; LOCATED IN: endomembrane system; Has 30201 Blast hits to 17322 proteins in 780 species: Archae - 12; Bacteria - 1396; Metazoa - 17338; Fungi - 3422; Plants - 5037; Viruses - 0; Other Eukaryotes - 2996 (source: NCBI BLink).	0	1	0	1
1962	Chr3	TAIR10	20584001	20585000	0	0.141469	0.497019	-2.43957	-0.0193474	-0.173792	0.619499	0.421728	-2.81136	5.99604	6.02093	4.91978	6.05079	0.428881	0.0728111	9.20091e-10	0.498512	0.626539	0.0817719	0.0708306	0.80802	0	1	0	1	1	0	1	0	1	NaN	NaN	NaN	NaN	NaN	NaN	NaN	NaN	NaN	NaN	NaN	NaN	NaN	NaN	NaN
2926	Chr5	TAIR10	16029001	16030000	0	-1.28389	-0.588589	-0.613917	-1.34252	-0.168194	-0.29503	-0.642034	-0.959698	5.60164	5.51221	5.79484	5.38644	0.0451961	0.115962	0.0489567	5.80475e-05	0.627083	0.0435	0.220016	0.778362	0	1	0	0	1	0	0	1	0	AT5G40040	0	Chr5	16029752	16030313	-	NaN	protein_coding	60S acidic ribosomal protein family	---	60S acidic ribosomal protein family; FUNCTIONS IN: structural constituent of ribosome; INVOLVED IN: translational elongation; LOCATED IN: cytosolic ribosome, ribosome; EXPRESSED IN: 7 plant structures; EXPRESSED DURING: 4 anthesis, F mature embryo stage, petal differentiation and expansion stage, D bilateral stage; CONTAINS InterPro DOMAIN/s: Ribosomal protein 60S (InterPro:IPR001813); BEST Arabi…	0.356144	0.68247	-0.321928	0.551484
2158	Chr4	TAIR10	7077001	7078000	0	0.0948636	0.122048	-1.18642	-1.00291	-0.94958	0.419183	0.171078	-1.93883	6.64899	6.3483	6.18825	6.25141	0.4486	0.432177	5.58466e-06	5.02258e-05	0.628469	0.166134	0.240905	0.0273424	0	1	1	0	0	0	0	0	0	AT4G11750	0	Chr4	7077390	7078550	-	NaN	protein_coding	Galactose oxidase/kelch repeat superfamily protein	---	Galactose oxidase/kelch repeat superfamily protein; CONTAINS InterPro DOMAIN/s: F-box domain, cyclin-like (InterPro:IPR001810), Galactose oxidase/kelch, beta-propeller (InterPro:IPR011043), Kelch repeat type 1 (InterPro:IPR006652), Kelch related (InterPro:IPR013089), Kelch-type beta propeller (InterPro:IPR015915); BEST Arabidopsis thaliana protein match is: Galactose oxidase/kelch repeat superfam…	0	1	0	1
3090	Chr5	TAIR10	21025001	21026000	0	-2.11895	0.0564012	-1.09587	-2.41978	0.0148642	-0.482182	-1.3672	-2.99638	4.44689	5.07835	4.6315	3.87924	0.0264004	0.493587	0.0183229	1.50367e-05	0.629737	1.08772	0.464646	1.0132	0	0	0	0	1	0	0	0	0	AT5G51760	-916	Chr5	21026916	21029188	+	1	protein_coding	Protein phosphatase 2C family protein	Encodes AHG1 (ABA-hypersensitive germination 1), a putative protein phosphatase 2C (PP2C). Expressed in seeds. AHG1 functions in seed development and germination.	ABA-hypersensitive germination 1 (AHG1); FUNCTIONS IN: protein serine/threonine phosphatase activity, catalytic activity; INVOLVED IN: seed germination, response to abscisic acid stimulus, seed development; LOCATED IN: protein serine/threonine phosphatase complex; EXPRESSED IN: seed; CONTAINS InterPro DOMAIN/s: Protein phosphatase 2C, manganese/magnesium aspartate binding site (InterPro:IPR000222…	0.137504	1	0.263034	0.831812
381	Chr1	TAIR10	12249001	12250000	0	0.184722	0.647622	-2.51202	-0.634115	0.136391	0.818747	0.572726	-2.92423	6.18585	6.22428	5.05059	5.91561	0.371013	0.011566	3.56478e-11	0.0270878	0.630576	0.0612715	0.0758557	1.5543	1	1	0	0	0	0	0	0	0	NaN	NaN	NaN	NaN	NaN	NaN	NaN	NaN	NaN	NaN	NaN	NaN	NaN	NaN	NaN
3113	Chr5	TAIR10	21720001	21721000	0	0.49246	0.0874504	-0.859073	-1.47111	-0.58275	0.110072	-1.24088	-4.46015	5.62581	5.40066	5.14218	4.76614	0.118656	0.48097	0.0276633	0.000420969	0.632535	1.15364	0.677248	0.432955	0	1	0	0	0	0	0	0	0	AT5G53486	-731	Chr5	21721731	21722838	+	NaN	protein_coding	---	---	unknown protein; LOCATED IN: endomembrane system; Has 16 Blast hits to 16 proteins in 6 species: Archae - 0; Bacteria - 0; Metazoa - 0; Fungi - 0; Plants - 16; Viruses - 0; Other Eukaryotes - 0 (source: NCBI BLink).	-0.574749	0.294878	0.0279158	0.932673
1051	Chr2	TAIR10	7892001	7893000	0	0.153733	-0.22895	-1.05168	-1.13471	-1.18629	0.688286	0.699909	-1.69186	6.43502	6.00154	6.01332	5.93629	0.391111	0.36658	0.000178911	3.84356e-05	0.633343	1.96393	0.23351	0.0222398	0	1	0	0	0	0	0	0	1	AT2G18150	0	Chr2	7892133	7893653	-	0	protein_coding	Peroxidase superfamily protein	---	Peroxidase superfamily protein; FUNCTIONS IN: peroxidase activity, heme binding; INVOLVED IN: response to oxidative stress, oxidation reduction, response to nematode; LOCATED IN: cell wall; CONTAINS InterPro DOMAIN/s: Haem peroxidase (InterPro:IPR010255), Plant peroxidase (InterPro:IPR000823), Peroxidases heam-ligand binding site (InterPro:IPR019793), Haem peroxidase, plant/fungal/bacterial (Inte…	-1.37851	0.011331	0.157541	0.827459
2400	Chr4	TAIR10	14375001	14376000	0	0.0966676	-0.495611	-0.792317	-1.73566	-0.358012	0.436254	-1.59172	-3.78287	5.83103	5.44647	5.57128	5.04662	0.469052	0.185796	0.0181682	3.13547e-06	0.634834	0.525629	0.653932	0.658636	0	1	0	1	1	0	0	1	0	NaN	NaN	NaN	NaN	NaN	NaN	NaN	NaN	NaN	NaN	NaN	NaN	NaN	NaN	NaN
178	Chr1	TAIR10	6178001	6179000	0	0.142626	0.029053	-1.03987	-1.16937	-0.465985	0.642165	0.324789	-1.36949	6.40979	6.10151	5.99963	5.89882	0.406208	0.496531	0.00022988	2.76349e-05	0.634908	0.831088	0.136922	0.430637	0	1	0	0	0	0	0	0	0	AT1G17950	0	Chr1	6177617	6179289	+	NaN	protein_coding	myb domain protein 52	putative transcription factor: R2R3-MYB transcription family	myb domain protein 52 (MYB52); CONTAINS InterPro DOMAIN/s: SANT, DNA-binding (InterPro:IPR001005), Homeodomain-like (InterPro:IPR009057), Myb, DNA-binding (InterPro:IPR014778), HTH transcriptional regulator, Myb-type, DNA-binding (InterPro:IPR017930), Homeodomain-related (InterPro:IPR012287), Myb transcription factor (InterPro:IPR015495); BEST Arabidopsis thaliana protein match is: myb domain pro…	0	1	0.652077	0.242985
2032	Chr3	TAIR10	22923001	22924000	0	-0.307804	-0.103281	-0.772786	-2.92969	-1.32643	-0.0694325	-1.58463	-3.69078	4.92123	5.02126	4.80805	3.64634	0.458704	0.484245	0.0779957	1.05526e-06	0.635257	0.878664	0.654029	0.376871	0	1	0	0	0	0	0	0	0	NaN	NaN	NaN	NaN	NaN	NaN	NaN	NaN	NaN	NaN	NaN	NaN	NaN	NaN	NaN
850	Chr1	TAIR10	27679001	27680000	0	0.0656694	0.19967	-1.40976	-1.13506	-0.965724	0.302639	0.608266	-1.67034	5.91724	5.84112	5.3746	5.45106	0.484591	0.379969	5.24505e-05	0.000572869	0.639925	0.504479	0.0846555	0.0806813	0	1	0	0	0	0	0	0	0	AT1G73610	0	Chr1	27678377	27679807	+	NaN	protein_coding	GDSL-like Lipase/Acylhydrolase superfamily protein	---	GDSL-like Lipase/Acylhydrolase superfamily protein; FUNCTIONS IN: lipase activity, hydrolase activity, acting on ester bonds, carboxylesterase activity; INVOLVED IN: lipid metabolic process; LOCATED IN: endomembrane system; EXPRESSED IN: central cell, embryo, sperm cell; EXPRESSED DURING: C globular stage; CONTAINS InterPro DOMAIN/s: Lipase, GDSL, active site (InterPro:IPR008265), Lipase, GDSL (I…	0	1	0	1
1115	Chr2	TAIR10	9621001	9622000	0	0.0316414	0.0393971	-1.58386	-2.13334	-0.802718	0.148385	0.0502501	-2.4891	6.00227	5.83867	5.39139	5.05639	0.496161	0.494694	4.12609e-06	5.88098e-09	0.641356	0.118422	0.222365	0.453508	0	2	0	0	0	0	0	0	0	AT2G22630	0	Chr2	9618372	9621957	+	0	protein_coding	AGAMOUS-like 17	Encodes a MADs domain containing protein involved in promoting flowering. Loss of function mutations show delayed flowering in long days and reduced levels of LFY and AP1 expression.	AGAMOUS-like 17 (AGL17); FUNCTIONS IN: sequence-specific DNA binding transcription factor activity; INVOLVED IN: positive regulation of long-day photoperiodism, flowering; LOCATED IN: nucleus; EXPRESSED IN: 7 plant structures; EXPRESSED DURING: L mature pollen stage; CONTAINS InterPro DOMAIN/s: Transcription factor, MADS-box (InterPro:IPR002100), Transcription factor, K-box (InterPro:IPR002487); …	0	1	2.10434	7.52231e-05
1610	Chr3	TAIR10	6334001	6335000	0	-1.51165	-0.102166	-1.54487	-2.27839	-0.632526	-0.330746	0.225038	-2.19862	4.30024	4.7781	4.12167	3.64432	0.129368	0.486939	0.00493604	0.000198018	0.641657	2.62033	0.174729	0.5658	0	0	0	0	0	0	0	0	0	AT3G18470	0	Chr3	6334822	6335822	-	NaN	protein_coding	PLAC8 family protein	---	PLAC8 family protein; CONTAINS InterPro DOMAIN/s: Protein of unknown function Cys-rich (InterPro:IPR006461); BEST Arabidopsis thaliana protein match is: PLAC8 family protein (TAIR:AT1G49030.1); Has 854 Blast hits to 853 proteins in 105 species: Archae - 0; Bacteria - 0; Metazoa - 132; Fungi - 122; Plants - 567; Viruses - 0; Other Eukaryotes - 33 (source: NCBI BLink).	0	1	0	1
2620	Chr5	TAIR10	3233001	3234000	0	0.101321	0.0661783	-1.21849	-0.836265	-0.594594	0.468118	0.181587	-2.28981	7.03184	6.60939	6.5467	6.72342	0.425494	0.474967	1.00503e-07	6.97719e-05	0.641882	0.462069	0.30554	0.169135	0	1	0	0	0	0	0	0	0	AT5G10280	0	Chr5	3232569	3234210	+	NaN	protein_coding	myb domain protein 92	Encodes a putative transcription factor (MYB92).	myb domain protein 92 (MYB92); CONTAINS InterPro DOMAIN/s: SANT, DNA-binding (InterPro:IPR001005), Homeodomain-like (InterPro:IPR009057), Myb, DNA-binding (InterPro:IPR014778), HTH transcriptional regulator, Myb-type, DNA-binding (InterPro:IPR017930), Homeodomain-related (InterPro:IPR012287), Myb transcription factor (InterPro:IPR015495); BEST Arabidopsis thaliana protein match is: myb domain pro…	0.25634	0.851048	-0.215729	0.773304
1117	Chr2	TAIR10	9641001	9642000	0	-2.22302	-1.76971	-1.36182	-2.23213	0.425815	-0.485184	-1.53065	-2.45962	3.94367	3.91065	4.03367	3.48445	0.0509345	0.00640198	0.0171107	0.000598452	0.642167	0.07248	0.287426	1.4731	0	0	0	1	1	0	0	0	0	NaN	NaN	NaN	NaN	NaN	NaN	NaN	NaN	NaN	NaN	NaN	NaN	NaN	NaN	NaN
2767	Chr5	TAIR10	7688001	7689000	0	0.280043	-0.432291	-2.97437	-1.12353	-0.590132	1.29023	1.69298	-1.8102	5.74399	5.33817	4.3462	5.16968	0.3018	0.248618	8.36572e-10	0.0021285	0.642501	1.68313	0.243421	0.311628	1	0	0	0	0	0	0	0	0	AT5G22980	0	Chr5	7688084	7690648	+	NaN	protein_coding	serine carboxypeptidase-like 47	---	serine carboxypeptidase-like 47 (scpl47); FUNCTIONS IN: serine-type carboxypeptidase activity; INVOLVED IN: proteolysis; LOCATED IN: endomembrane system; EXPRESSED IN: 7 plant structures; EXPRESSED DURING: 4 anthesis, C globular stage, petal differentiation and expansion stage; CONTAINS InterPro DOMAIN/s: Peptidase S10, serine carboxypeptidase (InterPro:IPR001563), Peptidase S10, serine carboxype…	0	1	0	1
1255	Chr2	TAIR10	13743001	13744000	0	0.163791	0.0642731	-1.15127	-0.777982	-0.461387	0.772987	0.485528	-0.930542	6.95334	6.52489	6.47096	6.64021	0.335384	0.477668	1.0639e-06	0.000354334	0.648925	0.763418	0.106129	0.255862	1	2	1	0	0	0	0	0	0	AT2G32370	0	Chr2	13740878	13746286	+	NaN	protein_coding	homeodomain GLABROUS 3	Encodes a homeobox-leucine zipper family protein belonging to the HD-ZIP IV family. Together with ATML1 and PDF2, it is involved in cotyledon development.	homeodomain GLABROUS 3 (HDG3); FUNCTIONS IN: DNA binding, sequence-specific DNA binding transcription factor activity; INVOLVED IN: regulation of transcription, DNA-dependent, cotyledon development; LOCATED IN: nucleus; EXPRESSED IN: fruit; EXPRESSED DURING: seedling growth; CONTAINS InterPro DOMAIN/s: Homeobox, conserved site (InterPro:IPR017970), Homeobox (InterPro:IPR001356), Homeodomain-like …	0	1	0.584963	0.361595
2327	Chr4	TAIR10	12111001	12112000	0	0.0763268	0.131913	-1.36218	-0.52542	-0.335799	0.363926	0.182636	-1.8347	6.07119	5.92039	5.54384	5.90804	0.47702	0.44055	3.32468e-05	0.0682674	0.650305	0.160238	0.147898	0.22069	0	0	0	0	0	0	0	0	0	AT4G23110	0	Chr4	12110857	12111570	+	NaN	protein_coding	insulin-like growth factor binding	---	insulin-like growth factor binding; FUNCTIONS IN: insulin-like growth factor binding; INVOLVED IN: biological_process unknown; LOCATED IN: extracellular region; CONTAINS InterPro DOMAIN/s: Insulin-like growth factor binding protein (InterPro:IPR009168); Has 67 Blast hits to 60 proteins in 25 species: Archae - 0; Bacteria - 0; Metazoa - 4; Fungi - 27; Plants - 21; Viruses - 0; Other Eukaryotes - 1…	0	1	0	1
1815	Chr3	TAIR10	11903001	11904000	0	0.266797	0.498153	-1.32728	-0.744762	-0.64878	1.26294	0.363842	-2.98745	6.24419	6.16271	5.63721	5.87799	0.26152	0.0590974	2.93881e-05	0.00993673	0.650335	0.155454	0.384948	0.0689755	0	0	0	0	0	0	0	0	0	NaN	NaN	NaN	NaN	NaN	NaN	NaN	NaN	NaN	NaN	NaN	NaN	NaN	NaN	NaN
395	Chr1	TAIR10	12705001	12706000	0	-1.8017	-0.483785	-0.489783	-1.45362	0.226467	-0.381097	-1.63194	-2.82996	4.83111	5.0701	5.22316	4.67449	0.0311755	0.241757	0.184844	0.000761733	0.651414	0.543191	0.705352	1.37133	0	0	0	0	0	0	0	0	0	NaN	NaN	NaN	NaN	NaN	NaN	NaN	NaN	NaN	NaN	NaN	NaN	NaN	NaN	NaN
1277	Chr2	TAIR10	14856001	14857000	0	-2.17763	-0.0788835	-2.07777	-2.55929	-1.21868	-0.459924	-0.184874	-1.75989	5.08162	5.50997	4.79898	4.47439	0.00402036	0.487067	7.6889e-07	1.11431e-08	0.651744	0.404919	0.0828744	0.355037	0	1	0	0	0	0	0	0	0	AT2G35270	-21	Chr2	14857021	14857878	+	1	protein_coding	Predicted AT-hook DNA-binding family protein	Direct target of AGAMOUS. Regulates patterning and differentiation of reproductive organs.	GIANT KILLER (GIK); CONTAINS InterPro DOMAIN/s: Protein of unknown function DUF296 (InterPro:IPR005175), Predicted AT-hook DNA-binding (InterPro:IPR014476); BEST Arabidopsis thaliana protein match is: Predicted AT-hook DNA-binding family protein (TAIR:AT4G17800.1); Has 1072 Blast hits to 1056 proteins in 125 species: Archae - 2; Bacteria - 116; Metazoa - 122; Fungi - 9; Plants - 786; Viruses - 5;…	0	1	0.137504	1
2568	Chr5	TAIR10	1933001	1934000	0	-0.247317	-0.561259	-1.68261	-1.76662	-0.280444	-0.0529048	-1.22727	-3.85493	5.12443	4.96359	4.55586	4.42045	0.46897	0.201574	0.000304202	0.000160856	0.651905	0.372797	0.392431	0.726714	0	0	0	0	0	0	0	0	0	NaN	NaN	NaN	NaN	NaN	NaN	NaN	NaN	NaN	NaN	NaN	NaN	NaN	NaN	NaN
1864	Chr3	TAIR10	16673001	16674000	0	0.110778	0.380946	-1.16011	-0.312228	-0.65043	0.529871	0.200095	-1.91423	6.78562	6.57572	6.32763	6.7285	0.424958	0.0948154	3.04848e-06	0.144446	0.652135	0.310186	0.245454	0.352052	0	2	0	0	0	0	0	0	0	AT3G45450	0	Chr3	16673146	16674880	+	NaN	protein_coding	Double Clp-N motif-containing P-loop nucleoside triphosphate hydrolases superfamily protein	---	Double Clp-N motif-containing P-loop nucleoside triphosphate hydrolases superfamily protein; FUNCTIONS IN: ATP binding; INVOLVED IN: protein metabolic process; CONTAINS InterPro DOMAIN/s: ATPase, AAA-type, core (InterPro:IPR003959), Clp, N-terminal (InterPro:IPR004176); BEST Arabidopsis thaliana protein match is: CLPC homologue 1 (TAIR:AT5G50920.1); Has 16633 Blast hits to 16323 proteins in 2747 …	0	1	0	1
3181	Chr5	TAIR10	23335001	23336000	0	0.114611	0.181447	-0.828825	-1.15901	-0.676552	0.558339	0.0849063	-2.24244	6.47755	6.23996	6.18162	5.98772	0.434419	0.370822	0.00196761	1.78137e-05	0.657423	0.359752	0.460572	0.263126	1	1	0	0	0	0	0	0	0	AT5G57620	0	Chr5	23334817	23336566	+	1	protein_coding	myb domain protein 36	Encodes a putative transcription factor (MYB36).	myb domain protein 36 (MYB36); CONTAINS InterPro DOMAIN/s: SANT, DNA-binding (InterPro:IPR001005), Homeodomain-like (InterPro:IPR009057), Myb, DNA-binding (InterPro:IPR014778), HTH transcriptional regulator, Myb-type, DNA-binding (InterPro:IPR017930), Homeodomain-related (InterPro:IPR012287), Myb transcription factor (InterPro:IPR015495); BEST Arabidopsis thaliana protein match is: myb domain pro…	0.387023	0.584665	-0.115477	1
512	Chr1	TAIR10	19365001	19366000	0	0.164709	0.419683	-2.66583	-0.299254	-0.284491	0.814048	0.845754	-2.99615	6.15339	6.09321	4.95452	6.06004	0.396496	0.117949	9.80748e-12	0.243943	0.662079	0.336167	0.0583614	0.0253781	0	0	0	0	0	0	0	0	0	AT1G52070	0	Chr1	19364888	19366924	-	NaN	protein_coding	Mannose-binding lectin superfamily protein	---	Mannose-binding lectin superfamily protein; FUNCTIONS IN: molecular_function unknown; INVOLVED IN: biological_process unknown; LOCATED IN: endomembrane system; EXPRESSED IN: root; CONTAINS InterPro DOMAIN/s: Mannose-binding lectin (InterPro:IPR001229); BEST Arabidopsis thaliana protein match is: Mannose-binding lectin superfamily protein (TAIR:AT1G52060.1); Has 1736 Blast hits to 822 proteins in …	0	1	0	1
2284	Chr4	TAIR10	10424001	10425000	0	-0.850381	-0.835439	-1.42155	-1.92087	-0.433066	-0.171984	-1.24209	-2.27319	5.13122	4.96329	4.83654	4.50465	0.233588	0.0668277	0.000817345	2.08331e-05	0.664858	0.195927	0.230624	0.632587	0	0	0	0	0	0	0	0	0	AT4G19030	-515	Chr4	10421525	10423487	-	1	protein_coding	NOD26-like major intrinsic protein 1	an aquaporin whose expression level is reduced by ABA, NaCl, dark, and dessication. is expressed at relatively low levels under normal conditions. Also functions in arsenite transport and tolerance.	NOD26-like major intrinsic protein 1 (NLM1); CONTAINS InterPro DOMAIN/s: Major intrinsic protein, conserved site (InterPro:IPR022357), Aquaporin (InterPro:IPR012269), Major intrinsic protein (InterPro:IPR000425); BEST Arabidopsis thaliana protein match is: NOD26-like intrinsic protein 1;2 (TAIR:AT4G18910.1); Has 30201 Blast hits to 17322 proteins in 780 species: Archae - 12; Bacteria - 1396; Meta…	3.03814	0.0534051	0.514573	0.391528
874	Chr1	TAIR10	28473001	28474000	0	-1.28227	-1.69261	-0.770554	-2.28165	0.059862	-0.258843	-0.410834	-0.93714	4.21158	3.96938	4.35015	3.49319	0.200303	0.00787103	0.130286	0.000422858	0.664946	0.609949	0.0976649	1.05484	0	0	0	0	0	0	0	0	0	NaN	NaN	NaN	NaN	NaN	NaN	NaN	NaN	NaN	NaN	NaN	NaN	NaN	NaN	NaN
2395	Chr4	TAIR10	14274001	14275000	0	0.115379	0.377355	-1.2975	-1.26122	-0.723252	0.57734	-0.107202	-3.24191	5.59071	5.66244	5.08252	5.02819	0.462918	0.210257	0.000884185	0.000977159	0.664961	1.78046	0.428529	0.271364	0	0	0	0	0	0	0	0	0	AT4G28940	0	Chr4	14274341	14277095	+	NaN	protein_coding	Phosphorylase superfamily protein	---	Phosphorylase superfamily protein; FUNCTIONS IN: catalytic activity; INVOLVED IN: nucleoside metabolic process; LOCATED IN: endomembrane system; EXPRESSED IN: hypocotyl, root, flower; EXPRESSED DURING: 4 anthesis; CONTAINS InterPro DOMAIN/s: Nucleoside phosphorylase (InterPro:IPR000845), Nucleoside phosphorylase, family 1 (InterPro:IPR018017); BEST Arabidopsis thaliana protein match is: Phosphory…	-0.0995357	1	0.736966	0.15386
2199	Chr4	TAIR10	7898001	7899000	0	0.0997266	0.160314	-1.31311	-0.82891	-0.317826	0.501584	-0.540487	-3.62058	5.87273	5.77459	5.36046	5.54112	0.466198	0.422259	0.00019093	0.0107127	0.666087	1.85312	0.467886	0.446465	0	1	0	0	0	0	0	0	0	NaN	NaN	NaN	NaN	NaN	NaN	NaN	NaN	NaN	NaN	NaN	NaN	NaN	NaN	NaN
1909	Chr3	TAIR10	18398001	18399000	0	-1.56437	-0.399326	-0.648322	-1.18402	-0.284631	-0.313051	-0.261919	-1.2116	5.72707	5.7441	5.97089	5.66591	0.0101943	0.22694	0.0267586	9.65462e-05	0.66722	0.20843	0.303177	0.613227	0	0	0	0	0	0	0	0	0	AT3G49630	0	Chr3	18397759	18400255	+	NaN	protein_coding	2-oxoglutarate (2OG) and Fe(II)-dependent oxygenase superfamily protein	---	2-oxoglutarate (2OG) and Fe(II)-dependent oxygenase superfamily protein; FUNCTIONS IN: oxidoreductase activity, iron ion binding; INVOLVED IN: aging, cellular response to starvation; LOCATED IN: endomembrane system; EXPRESSED IN: stem, root, carpel; EXPRESSED DURING: petal differentiation and expansion stage; CONTAINS InterPro DOMAIN/s: Isopenicillin N synthase (InterPro:IPR002283), Oxoglutarate/…	0	1	0	1
110	Chr1	TAIR10	4131001	4132000	0	-0.852989	-0.315019	-0.573395	-1.02556	-0.391081	-0.170452	-0.577986	-2.44576	5.91225	5.78667	6.01414	5.75265	0.134132	0.301358	0.0472193	0.000549748	0.66821	0.295136	0.620573	0.448511	0	2	0	0	1	0	0	0	0	AT1G12180	0	Chr1	4130421	4131137	+	NaN	protein_coding	---	---	BEST Arabidopsis thaliana protein match is: HSP20-like chaperones superfamily protein (TAIR:AT5G47600.1); Has 8 Blast hits to 8 proteins in 3 species: Archae - 0; Bacteria - 0; Metazoa - 0; Fungi - 0; Plants - 8; Viruses - 0; Other Eukaryotes - 0 (source: NCBI BLink).	0	1	0	1
1269	Chr2	TAIR10	14402001	14403000	0	0.20819	0.0465362	-2.17193	-0.666286	-0.814942	1.05248	1.58172	-1.16203	5.09368	5.08329	4.12692	4.76925	0.418567	0.49561	5.13232e-05	0.116797	0.668653	0.941683	0.303093	0.100496	0	0	0	0	0	0	0	0	0	AT2G34110	0	Chr2	14392551	14403317	+	NaN	protein_coding	---	---	BEST Arabidopsis thaliana protein match is: forkhead-associated (FHA) domain-containing protein (TAIR:AT1G34355.1); Has 19 Blast hits to 19 proteins in 5 species: Archae - 0; Bacteria - 0; Metazoa - 0; Fungi - 0; Plants - 19; Viruses - 0; Other Eukaryotes - 0 (source: NCBI BLink).	-0.137504	1	-0.137504	1
1591	Chr3	TAIR10	5649001	5650000	0	-1.78923	0.500532	-1.10093	-0.834053	-1.07737	-0.35598	0.417753	-1.60751	5.94534	6.37849	6.02362	6.12194	0.0013367	0.0408922	7.85482e-05	0.00148411	0.66874	0.0899491	0.187179	0.12743	1	1	0	0	0	0	0	0	1	AT3G16590	0	Chr3	5649932	5651056	-	1	protein_coding	F-box and associated interaction domains-containing protein	---	F-box and associated interaction domains-containing protein; CONTAINS InterPro DOMAIN/s: F-box domain, cyclin-like (InterPro:IPR001810), F-box domain, Skp2-like (InterPro:IPR022364), F-box associated domain, type 1 (InterPro:IPR006527), F-box associated interaction domain (InterPro:IPR017451); BEST Arabidopsis thaliana protein match is: F-box and associated interaction domains-containing protein …	0.263034	0.831812	0.765535	0.247789
1611	Chr3	TAIR10	6360001	6361000	0	-0.570501	-0.956998	-0.450238	-1.39596	-0.0529576	-0.114051	-1.13307	-2.14797	5.16846	4.88505	5.27128	4.73359	0.351822	0.0409828	0.209599	0.000983081	0.66874	0.0843211	0.653928	0.928182	0	1	0	0	0	0	0	0	0	AT3G18518	0	Chr3	6360135	6360296	+	NaN	protein_coding	ROTUNDIFOLIA like 20	Member of a family of small polypeptides found only in angiosperm lineages.Contains a conserved 29 amino acid domain (RTF or DVL domain).	ROTUNDIFOLIA like 20 (RTFL20); CONTAINS InterPro DOMAIN/s: DVL (InterPro:IPR012552); Has 13 Blast hits to 13 proteins in 4 species: Archae - 0; Bacteria - 0; Metazoa - 0; Fungi - 0; Plants - 13; Viruses - 0; Other Eukaryotes - 0 (source: NCBI BLink).	0	1	0	1
2097	Chr4	TAIR10	1354001	1355000	0	-1.55161	-0.206826	-1.15562	-1.7655	-0.683887	-0.305471	-0.0200648	-1.50284	4.58873	4.95944	4.60277	4.20637	0.0877874	0.442128	0.0135996	0.000491924	0.671744	0.830453	0.13071	0.441947	0	0	0	0	0	0	0	0	0	NaN	NaN	NaN	NaN	NaN	NaN	NaN	NaN	NaN	NaN	NaN	NaN	NaN	NaN	NaN
1595	Chr3	TAIR10	5856001	5857000	0	-1.09382	-1.14533	-1.09175	-1.51724	-0.542058	-0.214694	-0.16019	-1.70356	5.94277	5.49157	5.85428	5.59972	0.0548522	0.00213579	0.000235808	7.41094e-07	0.672879	0.755753	0.219024	0.47401	1	0	0	0	0	0	0	0	0	AT3G17180	0	Chr3	5855861	5859157	-	NaN	protein_coding	serine carboxypeptidase-like 33	---	serine carboxypeptidase-like 33 (scpl33); FUNCTIONS IN: serine-type carboxypeptidase activity; INVOLVED IN: proteolysis; LOCATED IN: endomembrane system; EXPRESSED IN: shoot apex, root, flower, stamen; EXPRESSED DURING: 4 anthesis, petal differentiation and expansion stage; CONTAINS InterPro DOMAIN/s: Peptidase S10, serine carboxypeptidase (InterPro:IPR001563), Peptidase S10, serine carboxypeptid…	0.321928	0.78737	-0.0931094	0.93282
2798	Chr5	TAIR10	8392001	8393000	0	0.0878943	-0.00414584	-2.15318	-1.42441	-1.09291	0.45376	-0.244004	-3.58845	6.00934	5.80112	5.09695	5.3893	0.470989	0.499956	1.04921e-08	1.81771e-05	0.672975	0.97444	0.250063	0.131795	0	2	0	0	0	0	0	0	0	AT5G24550	0	Chr5	8392059	8395302	-	NaN	protein_coding	beta glucosidase 32	---	beta glucosidase 32 (BGLU32); FUNCTIONS IN: cation binding, hydrolase activity, hydrolyzing O-glycosyl compounds, catalytic activity; INVOLVED IN: response to other organism; LOCATED IN: endomembrane system; EXPRESSED IN: synergid; CONTAINS InterPro DOMAIN/s: Glycoside hydrolase, family 1 (InterPro:IPR001360), Glycoside hydrolase, family 1, active site (InterPro:IPR018120), Glycoside hydrolase, c…	0	1	0	1
33	Chr1	TAIR10	928001	929000	0	-0.558727	0.107375	-0.609126	-2.07058	-0.692012	-0.109818	-1.20064	-2.64833	5.98337	5.97666	5.99455	5.22764	0.276314	0.458244	0.0361411	1.95449e-09	0.673486	1.19862	0.626396	0.499374	0	1	0	0	1	0	0	0	0	NaN	NaN	NaN	NaN	NaN	NaN	NaN	NaN	NaN	NaN	NaN	NaN	NaN	NaN	NaN
475	Chr1	TAIR10	18242001	18243000	0	0.212827	0.242514	-3.62073	-0.452446	-1.06007	1.10565	1.45696	-1.17752	3.8938	4.26599	2.2464	3.64525	0.461156	0.43646	0.000425824	0.367586	0.676136	0.71376	0.509399	0.402261	0	0	0	0	0	0	0	0	0	NaN	NaN	NaN	NaN	NaN	NaN	NaN	NaN	NaN	NaN	NaN	NaN	NaN	NaN	NaN
205	Chr1	TAIR10	6843001	6844000	0	-0.73499	0.379541	-1.01922	-1.60883	-0.396981	-0.142755	-1.2745	-3.94719	6.07635	6.21708	5.93236	5.59883	0.167335	0.138025	0.000435329	1.40318e-07	0.676264	1.85231	0.589791	0.604773	1	1	0	0	1	0	0	1	0	NaN	NaN	NaN	NaN	NaN	NaN	NaN	NaN	NaN	NaN	NaN	NaN	NaN	NaN	NaN
1951	Chr3	TAIR10	19939001	19940000	0	-0.669928	0.389241	-2.11186	-2.19988	-1.14669	-0.129498	-0.0510568	-2.26339	4.59439	5.08127	3.93153	3.76929	0.36106	0.270026	0.000255088	0.000174656	0.677717	1.29429	0.0346487	0.314897	0	2	0	0	0	0	0	0	0	AT3G53820	0	Chr3	19938706	19939134	+	NaN	protein_coding	C2H2 and C2HC zinc fingers superfamily protein	---	C2H2 and C2HC zinc fingers superfamily protein; FUNCTIONS IN: sequence-specific DNA binding transcription factor activity, zinc ion binding, nucleic acid binding; INVOLVED IN: regulation of transcription; LOCATED IN: mitochondrion, intracellular; CONTAINS InterPro DOMAIN/s: Zinc finger, C2H2-like (InterPro:IPR015880), Zinc finger, C2H2-type (InterPro:IPR007087); BEST Arabidopsis thaliana protein …	0	1	0	1
1333	Chr2	TAIR10	16798001	16799000	0	-1.63517	-0.694514	-2.0606	-1.81918	-0.684859	-0.312608	-0.0209479	-2.5063	5.76497	5.65697	5.34667	5.40527	0.00634853	0.0527297	2.1997e-09	2.334e-08	0.679708	0.944081	0.0976375	0.453358	0	1	0	0	0	0	0	0	0	AT2G40220	-417	Chr2	16796599	16797585	-	NaN	protein_coding	Integrase-type DNA-binding superfamily protein	Encodes a member of the DREB subfamily A-3 of ERF/AP2 transcription factor family (ABI4). The protein contains one AP2 domain. There is only one member in this family. Involved in abscisic acid (ABA) signal transduction, ABA-mediated glucose response, and hexokinase-dependent sugar responses. Acts downstream of GUN1 in retrograde signaling. Expressed most abundantly in developing siliques and to …	ABA INSENSITIVE 4 (ABI4); CONTAINS InterPro DOMAIN/s: DNA-binding, integrase-type (InterPro:IPR016177), Pathogenesis-related transcriptional factor/ERF, DNA-binding (InterPro:IPR001471); BEST Arabidopsis thaliana protein match is: Integrase-type DNA-binding superfamily protein (TAIR:AT3G57600.1); Has 5833 Blast hits to 5755 proteins in 285 species: Archae - 0; Bacteria - 4; Metazoa - 56; Fungi - …	0.137504	1	0	1
294	Chr1	TAIR10	9161001	9162000	0	-2.09351	-0.709545	-0.895671	-1.84613	-0.906321	-0.399105	-0.12799	-1.54911	6.14262	6.02513	6.3915	5.89578	4.56997e-05	0.0241484	0.000282131	1.23242e-11	0.680316	0.696027	0.267499	0.341694	0	1	0	0	0	0	0	0	0	AT1G26515	0	Chr1	9161810	9162910	-	1	protein_coding	F-box and associated interaction domains-containing protein	---	F-box and associated interaction domains-containing protein; CONTAINS InterPro DOMAIN/s: F-box domain, Skp2-like (InterPro:IPR022364), F-box associated domain, type 3 (InterPro:IPR013187), F-box associated interaction domain (InterPro:IPR017451); BEST Arabidopsis thaliana protein match is: F-box associated ubiquitination effector family protein (TAIR:AT1G26510.1).	0.241008	0.83882	-0.137504	1
2847	Chr5	TAIR10	10214001	10215000	0	0.127241	0.540666	-3.52747	-0.644902	-0.73731	0.673907	1.69943	-1.15592	4.26737	4.73206	2.70129	3.97532	0.481621	0.196658	5.16976e-05	0.227889	0.680655	0.516822	0.506591	0.0669517	0	0	0	0	0	0	0	0	0	AT5G28237	-404	Chr5	10207353	10213598	-	2	protein_coding	Pyridoxal-5'-phosphate-dependent enzyme family protein	---	Pyridoxal-5'-phosphate-dependent enzyme family protein; FUNCTIONS IN: pyridoxal phosphate binding, tryptophan synthase activity, catalytic activity; INVOLVED IN: tryptophan biosynthetic process, metabolic process, tryptophan metabolic process; CONTAINS InterPro DOMAIN/s: Tryptophan synthase, beta chain (InterPro:IPR006654), Tryptophan synthase, beta chain, conserved site (InterPro:IPR006653), Pyr…	-2.07215	0.0646366	0.766569	0.063533
1387	Chr2	TAIR10	18087001	18088000	0	-1.58091	-0.974764	-1.77947	-2.25025	-1.07893	-0.298321	0.170693	-1.56428	5.52197	5.33872	5.22915	4.92703	0.0158934	0.0143024	9.15224e-07	4.23025e-09	0.683234	1.42812	0.0643935	0.352044	2	0	0	0	0	0	0	0	0	AT2G43610	0	Chr2	18087840	18089224	-	NaN	protein_coding	Chitinase family protein	---	Chitinase family protein; FUNCTIONS IN: chitin binding, chitinase activity; INVOLVED IN: carbohydrate metabolic process, cell wall macromolecule catabolic process; LOCATED IN: plasma membrane; EXPRESSED IN: 15 plant structures; EXPRESSED DURING: 7 growth stages; CONTAINS InterPro DOMAIN/s: Chitin-binding, type 1, conserved site (InterPro:IPR018371), Glycoside hydrolase, family 19 (InterPro:IPR016…	-0.520832	0.734526	0.683526	0.308169
630	Chr1	TAIR10	22750001	22751000	0	0.0732192	0.0334056	-1.92165	-0.722159	-0.685641	0.394512	-0.0437475	-3.30505	6.63238	6.29957	5.82908	6.38586	0.469057	0.494749	3.56696e-11	0.00265386	0.683993	9.24885	0.264781	0.0259767	1	2	0	0	0	0	0	0	0	AT1G61640	-818	Chr1	22746372	22749184	-	NaN	protein_coding	Protein kinase superfamily protein	---	Protein kinase superfamily protein; CONTAINS InterPro DOMAIN/s: ABC-1 (InterPro:IPR004147), Protein kinase-like domain (InterPro:IPR011009); BEST Arabidopsis thaliana protein match is: Protein kinase superfamily protein (TAIR:AT1G11390.1); Has 9331 Blast hits to 9278 proteins in 1808 species: Archae - 122; Bacteria - 4378; Metazoa - 406; Fungi - 512; Plants - 679; Viruses - 16; Other Eukaryotes -…	-0.00866486	0.991328	0.110818	0.726839
2172	Chr4	TAIR10	7416001	7417000	0	0.0762967	0.369696	-1.7136	-0.458083	-0.648628	0.41203	0.214574	-2.43432	6.16609	6.11154	5.46837	6.03889	0.475515	0.160693	2.63177e-07	0.0953377	0.684713	0.264591	0.173839	0.172485	0	1	0	0	0	0	0	0	0	NaN	NaN	NaN	NaN	NaN	NaN	NaN	NaN	NaN	NaN	NaN	NaN	NaN	NaN	NaN
1795	Chr3	TAIR10	11311001	11312000	0	0.156948	-0.342461	-1.17444	-0.0324567	-0.662192	0.849341	0.904601	0.107792	5.93235	5.56783	5.45767	5.9711	0.41735	0.299005	0.000595118	0.496047	0.686702	2.21055	1.20437	0.90917	0	0	0	0	0	0	0	0	1	AT3G29430	0	Chr3	11311356	11312792	+	NaN	protein_coding	Terpenoid synthases superfamily protein	---	Terpenoid synthases superfamily protein; INVOLVED IN: isoprenoid biosynthetic process; EXPRESSED IN: root; CONTAINS InterPro DOMAIN/s: Polyprenyl synthetase-related (InterPro:IPR017446), Terpenoid synthase (InterPro:IPR008949), Polyprenyl synthetase (InterPro:IPR000092); BEST Arabidopsis thaliana protein match is: Terpenoid synthases superfamily protein (TAIR:AT3G32040.1); Has 16721 Blast hits to…	0	1	0	1
2319	Chr4	TAIR10	11913001	11914000	0	0.137875	-0.115374	-1.9961	-0.940378	-1.16734	0.747064	0.955641	-1.15507	6.17973	5.86303	5.31566	5.78019	0.423727	0.465449	1.06307e-08	0.00145718	0.686844	1.27159	0.267063	0.107785	0	0	0	0	0	0	0	0	0	AT4G22650	0	Chr4	11913557	11914027	+	NaN	protein_coding	---	---	CONTAINS InterPro DOMAIN/s: Plant lipid transfer protein/seed storage/trypsin-alpha amylase inhibitor (InterPro:IPR003612); BEST Arabidopsis thaliana protein match is: Bifunctional inhibitor/lipid-transfer protein/seed storage 2S albumin superfamily protein (TAIR:AT4G22640.1); Has 25 Blast hits to 25 proteins in 2 species: Archae - 0; Bacteria - 0; Metazoa - 0; Fungi - 0; Plants - 25; Viruses - 0…	0	1	0	1
2799	Chr5	TAIR10	8393001	8394000	0	0.0941738	0.257982	-1.44661	-1.17636	-0.710315	0.512086	0.203019	-2.51535	6.46523	6.27662	5.88253	5.97689	0.455087	0.269037	5.5009e-07	1.41507e-05	0.687062	0.11871	0.269886	0.247281	0	2	0	0	0	0	0	0	0	AT5G24550	0	Chr5	8392059	8395302	-	NaN	protein_coding	beta glucosidase 32	---	beta glucosidase 32 (BGLU32); FUNCTIONS IN: cation binding, hydrolase activity, hydrolyzing O-glycosyl compounds, catalytic activity; INVOLVED IN: response to other organism; LOCATED IN: endomembrane system; EXPRESSED IN: synergid; CONTAINS InterPro DOMAIN/s: Glycoside hydrolase, family 1 (InterPro:IPR001360), Glycoside hydrolase, family 1, active site (InterPro:IPR018120), Glycoside hydrolase, c…	0	1	0	1
1174	Chr2	TAIR10	11440001	11441000	0	-1.40919	-0.927468	-1.28398	-1.80509	-0.618461	-0.261393	0.247113	-0.868437	4.82222	4.79403	4.73595	4.38919	0.0925343	0.0550818	0.00379524	0.00013498	0.687887	1.73151	0.193237	0.490029	0	0	0	0	0	0	0	0	0	AT2G26820	0	Chr2	11437808	11442199	+	NaN	protein_coding	phloem protein 2-A3	---	phloem protein 2-A3 (PP2-A3); CONTAINS InterPro DOMAIN/s: AIG1 (InterPro:IPR006703); BEST Arabidopsis thaliana protein match is: P-loop containing nucleoside triphosphate hydrolases superfamily protein (TAIR:AT1G33900.1); Has 7075 Blast hits to 5270 proteins in 530 species: Archae - 11; Bacteria - 693; Metazoa - 2878; Fungi - 405; Plants - 651; Viruses - 87; Other Eukaryotes - 2350 (source: NCBI …	0.241008	0.83882	-0.137504	1
3173	Chr5	TAIR10	23134001	23135000	0	-1.89822	-1.03652	-1.33113	-2.87497	-0.354787	-0.347261	-0.321166	-2.31515	3.85873	4.10573	3.88479	2.99292	0.104028	0.0904519	0.0272861	0.000168647	0.691318	0.527669	0.270019	0.780784	1	0	0	0	0	0	0	1	0	NaN	NaN	NaN	NaN	NaN	NaN	NaN	NaN	NaN	NaN	NaN	NaN	NaN	NaN	NaN
328	Chr1	TAIR10	10549001	10550000	0	-1.93304	-0.647948	-1.59691	-2.92969	-0.130263	-0.353575	-1.67726	-2.6291	4.51492	4.78237	4.41184	3.64634	0.0384313	0.171874	0.00119744	1.05526e-06	0.691348	0.443056	0.244364	0.915458	0	0	0	0	0	0	0	0	0	AT1G30070	-851	Chr1	10546591	10548151	-	NaN	protein_coding	SGS domain-containing protein	---	SGS domain-containing protein; FUNCTIONS IN: molecular_function unknown; INVOLVED IN: biological_process unknown; LOCATED IN: plasma membrane; EXPRESSED IN: 24 plant structures; EXPRESSED DURING: 13 growth stages; CONTAINS InterPro DOMAIN/s: CS-like domain (InterPro:IPR007052), Siah interacting protein, N-terminal (InterPro:IPR015120), SGS (InterPro:IPR007699), HSP20-like chaperone (InterPro:IPR0…	-0.033714	0.946107	-0.351134	0.228446
3272	Chr5	TAIR10	26632001	26633000	0	0.558966	-0.0736132	-0.344627	-2.02775	0.0595753	0.100018	-1.03767	-3.40032	5.59789	5.27807	5.32926	4.42519	0.0812059	0.490377	0.294225	1.19303e-05	0.694339	0.86908	0.816387	1.06162	2	1	0	0	1	0	0	0	0	NaN	NaN	NaN	NaN	NaN	NaN	NaN	NaN	NaN	NaN	NaN	NaN	NaN	NaN	NaN
649	Chr1	TAIR10	23140001	23141000	0	0.0985013	0.719473	-2.41799	-0.600522	-0.67211	0.552837	0.703369	-2.70476	6.08483	6.21611	5.03876	5.87311	0.461972	0.00491401	2.40807e-10	0.0394774	0.695407	0.0113018	0.0560013	0.0563402	0	1	0	0	0	0	0	0	0	NaN	NaN	NaN	NaN	NaN	NaN	NaN	NaN	NaN	NaN	NaN	NaN	NaN	NaN	NaN
1423	Chr2	TAIR10	18915001	18916000	0	-0.878592	-0.576076	-0.00870847	-1.51347	-0.154144	-0.158643	-1.59532	-2.63114	5.31009	5.21859	5.69889	4.89871	0.199337	0.159576	0.499781	0.000135225	0.695446	0.469829	0.994155	0.816111	0	1	0	0	1	0	0	0	0	AT2G45970	-263	Chr2	18912260	18914739	-	NaN	protein_coding	cytochrome P450, family 86, subfamily A, polypeptide 8	Encodes a member of the CYP86A subfamily of cytochrome p450 genes. Expressed at moderate levels in flowers, leaves, roots and stems.	cytochrome P450, family 86, subfamily A, polypeptide 8 (CYP86A8); FUNCTIONS IN: alkane 1-monooxygenase activity, oxygen binding; INVOLVED IN: fatty acid metabolic process; LOCATED IN: endomembrane system; EXPRESSED IN: 13 plant structures; EXPRESSED DURING: 7 growth stages; CONTAINS InterPro DOMAIN/s: Cytochrome P450 (InterPro:IPR001128), Cytochrome P450, E-class, group I (InterPro:IPR002401), Cy…	-0.152424	0.663135	-0.206791	0.361608
455	Chr1	TAIR10	17693001	17694000	0	0.0706971	-0.268321	-1.35689	-1.07608	-1.0351	0.39893	0.159337	-2.06243	5.98214	5.67109	5.46146	5.54442	0.481381	0.356225	6.08484e-05	0.000757222	0.695959	3.9974	0.206461	0.0194285	0	2	0	0	0	0	0	0	0	AT1G47980	0	Chr1	17691834	17693867	-	NaN	protein_coding	---	---	unknown protein; FUNCTIONS IN: molecular_function unknown; INVOLVED IN: biological_process unknown; LOCATED IN: endomembrane system; EXPRESSED IN: 6 plant structures; EXPRESSED DURING: 4 anthesis, F mature embryo stage, petal differentiation and expansion stage, E expanded cotyledon stage; BEST Arabidopsis thaliana protein match is: unknown protein (TAIR:AT3G62730.1); Has 169 Blast hits to 169 pr…	-0.137504	1	0.447459	0.557197
2569	Chr5	TAIR10	2008001	2009000	0	-0.496544	-0.054539	-1.18406	-0.470921	-0.580712	-0.0892965	-0.0898495	-2.85923	6.03767	5.92856	5.7563	6.06715	0.307427	0.491698	0.000110368	0.0838135	0.697532	0.247987	0.414513	0.1046	0	0	0	0	0	0	0	0	0	AT5G06570	0	Chr5	2007600	2011041	-	NaN	protein_coding	alpha/beta-Hydrolases superfamily protein	---	alpha/beta-Hydrolases superfamily protein; FUNCTIONS IN: hydrolase activity; INVOLVED IN: metabolic process; LOCATED IN: cellular_component unknown; EXPRESSED IN: 6 plant structures; EXPRESSED DURING: petal differentiation and expansion stage; CONTAINS InterPro DOMAIN/s: Alpha/beta hydrolase fold-3 (InterPro:IPR013094); BEST Arabidopsis thaliana protein match is: carboxyesterase 17 (TAIR:AT5G1608…	0.938599	0.531993	0.938599	0.253947
85	Chr1	TAIR10	3090001	3091000	0	0.0487687	0.0599947	-0.855077	-1.32086	-0.633396	0.281251	0.0302198	-1.99069	6.00033	5.84097	5.73143	5.45188	0.490939	0.487762	0.00668822	5.16517e-05	0.700206	0.322887	0.399333	0.352139	1	1	0	0	0	0	0	0	0	AT1G09550	0	Chr1	3089733	3092327	-	1	protein_coding	Pectinacetylesterase family protein	---	Pectinacetylesterase family protein; FUNCTIONS IN: carboxylesterase activity; INVOLVED IN: biological_process unknown; LOCATED IN: endomembrane system; CONTAINS InterPro DOMAIN/s: Pectinacetylesterase (InterPro:IPR004963); BEST Arabidopsis thaliana protein match is: Pectinacetylesterase family protein (TAIR:AT1G57590.1); Has 515 Blast hits to 510 proteins in 88 species: Archae - 0; Bacteria - 30;…	0.137504	1	0	1
3223	Chr5	TAIR10	24773001	24774000	0	-1.28056	-1.29377	-1.6599	-0.914967	-1.69999	-0.226081	-0.263985	-2.18313	5.72054	5.29282	5.40825	5.72111	0.0372646	0.00115975	1.11927e-06	0.00248327	0.700817	0.661919	0.13622	0.300436	0	1	0	0	0	0	0	0	0	AT5G61620	0	Chr5	24772383	24773507	+	NaN	protein_coding	myb-like transcription factor family protein	---	myb-like transcription factor family protein; CONTAINS InterPro DOMAIN/s: SANT, DNA-binding (InterPro:IPR001005), Homeodomain-like (InterPro:IPR009057), Myb, DNA-binding (InterPro:IPR014778), Zinc finger, CCHC-type (InterPro:IPR001878), HTH transcriptional regulator, Myb-type, DNA-binding (InterPro:IPR017930), Myb-like DNA-binding domain, SHAQKYF class (InterPro:IPR006447); BEST Arabidopsis thali…	-0.137504	1	0	1
1625	Chr3	TAIR10	6915001	6916000	0	0.0854658	-0.217974	-1.37991	-0.631892	-0.510676	0.491868	0.474809	-1.79947	6.42251	6.02283	5.87682	6.20985	0.463753	0.375811	1.99197e-06	0.0143608	0.701499	2.67654	0.132045	0.106277	1	1	0	0	0	0	0	0	0	AT3G19890	0	Chr3	6914910	6916142	-	NaN	protein_coding	F-box family protein	---	F-box family protein; CONTAINS InterPro DOMAIN/s: F-box domain, cyclin-like (InterPro:IPR001810), F-box domain, Skp2-like (InterPro:IPR022364), F-box associated domain, type 1 (InterPro:IPR006527), F-box associated interaction domain (InterPro:IPR017451); BEST Arabidopsis thaliana protein match is: F-box family protein (TAIR:AT1G32140.1); Has 1038 Blast hits to 987 proteins in 15 species: Archae …	0	1	0	1
2949	Chr5	TAIR10	16712001	16713000	0	-1.48516	-1.06407	-0.785964	-1.18118	-0.890205	-0.260549	-0.616488	-2.25356	5.89337	5.56409	6.049	5.81733	0.00975147	0.00353615	0.00532385	3.92209e-05	0.702302	0.266647	0.483156	0.140608	0	1	0	0	0	0	0	0	0	AT5G41761	0	Chr5	16711437	16712031	+	0	protein_coding	---	---	unknown protein; FUNCTIONS IN: molecular_function unknown; INVOLVED IN: biological_process unknown; LOCATED IN: cellular_component unknown; BEST Arabidopsis thaliana protein match is: unknown protein (TAIR:AT3G55570.1); Has 30201 Blast hits to 17322 proteins in 780 species: Archae - 12; Bacteria - 1396; Metazoa - 17338; Fungi - 3422; Plants - 5037; Viruses - 0; Other Eukaryotes - 2996 (source: NC…	1.57586	0.141006	1.49125	0.0136712
2321	Chr4	TAIR10	11916001	11917000	0	-0.60411	-0.336077	-1.38947	-2.27031	-0.292605	-0.105622	0.145454	-1.62441	5.31863	5.27812	4.9759	4.45878	0.322872	0.333465	0.000584723	5.73253e-07	0.704345	2.55288	0.0780061	0.772265	0	2	0	0	0	0	0	0	0	AT4G22660	0	Chr4	11914981	11916171	-	NaN	protein_coding	F-box family protein with a domain of unknown function (DUF295)	---	CONTAINS InterPro DOMAIN/s: F-box domain, cyclin-like (InterPro:IPR001810), F-box domain, Skp2-like (InterPro:IPR022364), Protein of unknown function DUF295 (InterPro:IPR005174); BEST Arabidopsis thaliana protein match is: F-box family protein with a domain of unknown function (DUF295) (TAIR:AT4G22165.1); Has 499 Blast hits to 486 proteins in 13 species: Archae - 0; Bacteria - 0; Metazoa - 0; Fun…	0	1	0	1
41	Chr1	TAIR10	1208001	1209000	0	-2.30708	-1.31348	-1.2087	-1.60602	-0.872062	-0.399943	-0.514767	-1.12383	5.1943	5.07891	5.35965	5.09953	0.0014343	0.00227838	0.000638032	1.20251e-05	0.705035	0.437352	0.0364207	0.29642	0	2	0	0	0	0	0	0	0	AT1G04450	0	Chr1	1208521	1209874	+	2	protein_coding	ROP-interactive CRIB motif-containing protein 3	Encodes a member of a novel protein family that contains contain a CRIB (for Cdc42/Rac-interactive binding) motif required for their specific interaction with GTP-bound Rop1 (plant-specific Rho GTPase). It interacts with Rop1 and is involved in pollen tube growth and function, and exocytosis in the pollen tube tip. The protein most similar to RIC1 (family subgroup III). Gene is expressed predomin…	ROP-interactive CRIB motif-containing protein 3 (RIC3); FUNCTIONS IN: protein binding; INVOLVED IN: in 7 processes; LOCATED IN: cytoplasm; CONTAINS InterPro DOMAIN/s: PAK-box/P21-Rho-binding (InterPro:IPR000095); BEST Arabidopsis thaliana protein match is: ROP-interactive CRIB motif-containing protein 1 (TAIR:AT2G33460.1); Has 189 Blast hits to 189 proteins in 25 species: Archae - 0; Bacteria - 0…	-1.12553	0.0409596	-1.26303	0.0243065
719	Chr1	TAIR10	24504001	24505000	0	-0.860954	-0.404835	-1.43345	-0.606193	-0.533587	-0.147368	0.110525	-0.565083	5.16079	5.17667	4.86254	5.19497	0.22551	0.289092	0.000651592	0.0992632	0.709102	1.76306	0.434938	0.0638139	0	1	0	0	0	0	0	0	1	AT1G65870	0	Chr1	24503624	24504193	+	NaN	protein_coding	Disease resistance-responsive (dirigent-like protein) family protein	---	Disease resistance-responsive (dirigent-like protein) family protein; FUNCTIONS IN: molecular_function unknown; INVOLVED IN: lignan biosynthetic process, defense response; LOCATED IN: cell wall; EXPRESSED IN: 13 plant structures; EXPRESSED DURING: 9 growth stages; CONTAINS InterPro DOMAIN/s: Plant disease resistance response protein (InterPro:IPR004265); BEST Arabidopsis thaliana protein match is…	0.395052	0.428539	-0.348172	0.279782
228	Chr1	TAIR10	7403001	7404000	0	-0.584233	0.124458	-0.748106	-1.5549	0.164591	-0.100242	-1.56625	-3.28523	5.12053	5.33314	5.08425	4.60856	0.350039	0.463871	0.0607064	0.000415716	0.709171	1.17427	0.629351	1.23855	0	0	0	0	0	0	0	0	0	AT1G21140	-383	Chr1	7404383	7405281	+	NaN	protein_coding	Vacuolar iron transporter (VIT) family protein	The gene encodes nodulin-like1 whose transcript abundance was repressed under conditions of Fe-deficient growth.	Vacuolar iron transporter (VIT) family protein; CONTAINS InterPro DOMAIN/s: Protein of unknown function DUF125, transmembrane (InterPro:IPR008217); BEST Arabidopsis thaliana protein match is: Vacuolar iron transporter (VIT) family protein (TAIR:AT3G43660.1); Has 1867 Blast hits to 1856 proteins in 645 species: Archae - 60; Bacteria - 1279; Metazoa - 0; Fungi - 103; Plants - 211; Viruses - 0; Othe…	0.548304	0.582339	0.391579	0.49717
2328	Chr4	TAIR10	12113001	12114000	0	0.108347	-0.367397	-1.48777	-1.04993	-0.633356	0.642731	-0.0212275	-2.87552	5.29434	5.08966	4.70262	4.83399	0.473085	0.326948	0.000825938	0.0114413	0.709601	0.895364	0.318196	0.247771	0	0	0	0	0	0	0	0	0	AT4G23120	0	Chr4	12113308	12115523	+	NaN	protein_coding	Bromo-adjacent homology (BAH) domain-containing protein	---	Bromo-adjacent homology (BAH) domain-containing protein; FUNCTIONS IN: DNA binding; LOCATED IN: cellular_component unknown; CONTAINS InterPro DOMAIN/s: Bromo adjacent homology (BAH) domain (InterPro:IPR001025); BEST Arabidopsis thaliana protein match is: Bromo-adjacent homology (BAH) domain-containing protein (TAIR:AT2G25120.1); Has 462 Blast hits to 462 proteins in 68 species: Archae - 0; Bacter…	0	1	0	1
1351	Chr2	TAIR10	17191001	17192000	0	-2.18571	-0.702219	-1.32281	-0.87797	-0.564653	-0.371821	-0.279924	-1.11218	5.95238	5.90106	6.0215	6.20868	6.91907e-05	0.0328207	1.63696e-06	0.000530492	0.709789	0.430851	0.086572	0.217487	0	1	0	0	0	0	0	0	0	AT2G41225	0	Chr2	17191028	17191486	-	NaN	protein_coding	---	---	unknown protein; FUNCTIONS IN: molecular_function unknown; INVOLVED IN: biological_process unknown; LOCATED IN: endomembrane system; Has 30201 Blast hits to 17322 proteins in 780 species: Archae - 12; Bacteria - 1396; Metazoa - 17338; Fungi - 3422; Plants - 5037; Viruses - 0; Other Eukaryotes - 2996 (source: NCBI BLink).	0	1	0	1
791	Chr1	TAIR10	25863001	25864000	0	0.372485	-0.255345	-0.303602	-1.18217	0.261141	0.06226	-0.387368	-2.13355	6.00627	5.58027	5.843	5.36158	0.171296	0.374763	0.27784	0.000501797	0.710312	0.206057	0.751471	1.57047	1	1	0	0	1	0	0	0	0	AT1G68810	0	Chr1	25861123	25863120	+	NaN	protein_coding	basic helix-loop-helix (bHLH) DNA-binding superfamily protein	---	basic helix-loop-helix (bHLH) DNA-binding superfamily protein; FUNCTIONS IN: DNA binding, sequence-specific DNA binding transcription factor activity; INVOLVED IN: regulation of transcription; LOCATED IN: nucleus; EXPRESSED IN: 20 plant structures; EXPRESSED DURING: 12 growth stages; CONTAINS InterPro DOMAIN/s: Helix-loop-helix DNA-binding domain (InterPro:IPR001092), Helix-loop-helix DNA-binding…	0.244398	0.575126	-0.112077	0.685444
1684	Chr3	TAIR10	7744001	7745000	0	0.0336212	-0.155097	-2.34697	-0.424378	-0.0676911	0.204227	0.0964984	-3.46641	5.48986	5.36007	4.51889	5.38521	0.496959	0.456366	3.80395e-07	0.202457	0.711308	4.44523	0.192628	0.727829	0	0	0	0	0	0	0	0	0	AT3G21980	-143	Chr3	7745143	7746161	+	NaN	protein_coding	Domain of unknown function (DUF26)	---	Domain of unknown function (DUF26); FUNCTIONS IN: molecular_function unknown; INVOLVED IN: biological_process unknown; LOCATED IN: endomembrane system; CONTAINS InterPro DOMAIN/s: Protein of unknown function DUF26 (InterPro:IPR002902); BEST Arabidopsis thaliana protein match is: Domain of unknown function (DUF26) (TAIR:AT3G21990.1); Has 1108 Blast hits to 1094 proteins in 19 species: Archae - 0; …	0	1	0	1
1807	Chr3	TAIR10	11746001	11747000	0	0.196365	-0.475093	-2.31342	-1.23772	-0.92052	1.17475	0.347492	-3.42228	5.10492	4.8647	4.07578	4.50109	0.426333	0.272274	2.1242e-05	0.00773657	0.71253	6.5492	0.193393	0.147108	0	1	0	0	0	0	0	0	0	AT3G29970	0	Chr3	11745211	11746570	+	NaN	protein_coding	B12D protein	---	B12D protein; FUNCTIONS IN: molecular_function unknown; INVOLVED IN: biological_process unknown; LOCATED IN: endomembrane system; EXPRESSED IN: 8 plant structures; EXPRESSED DURING: F mature embryo stage, 4 leaf senescence stage, petal differentiation and expansion stage, E expanded cotyledon stage, D bilateral stage; CONTAINS InterPro DOMAIN/s: B12D (InterPro:IPR010530); BEST Arabidopsis thalian…	0	1	0.137504	1
3068	Chr5	TAIR10	20225001	20226000	0	0.280638	-0.659304	-1.51899	0.392739	-0.359602	0.0461277	0.770588	-2.38465	5.63356	5.1543	4.93685	5.81444	0.312617	0.119566	0.000193883	0.176267	0.713305	12.6221	0.22187	21.4116	0	1	0	0	0	0	0	0	0	AT5G49770	0	Chr5	20222669	20227267	+	NaN	protein_coding	Leucine-rich repeat protein kinase family protein	---	Leucine-rich repeat protein kinase family protein; FUNCTIONS IN: protein serine/threonine kinase activity, protein kinase activity, ATP binding; INVOLVED IN: transmembrane receptor protein tyrosine kinase signaling pathway, protein amino acid phosphorylation; LOCATED IN: endomembrane system; EXPRESSED IN: sperm cell, root; CONTAINS InterPro DOMAIN/s: Protein kinase, ATP binding site (InterPro:IPR…	-0.36257	0.596615	0.152003	0.871415
156	Chr1	TAIR10	5085001	5086000	0	-2.27795	-0.474102	-1.70705	-2.22559	-0.780391	-0.377829	-0.27565	-1.75326	5.4712	5.65232	5.38558	5.0658	0.000496671	0.175876	6.54204e-07	1.0155e-09	0.716006	0.265399	0.0133602	0.481095	0	1	0	1	1	0	0	0	0	AT1G14760	0	Chr1	5084352	5085213	-	1	protein_coding	KNOX Arabidopsis thaliana meinox	Encodes a novel Arabidopsis KNOX gene that encodes a MEINOX domain but lacks the homeodomain and interacts with TALE-class homeodomain proteins to modulate their activities	KNOX Arabidopsis thaliana meinox (KNATM); CONTAINS InterPro DOMAIN/s: KNOX1 (InterPro:IPR005540); Has 38 Blast hits to 38 proteins in 13 species: Archae - 0; Bacteria - 0; Metazoa - 0; Fungi - 0; Plants - 38; Viruses - 0; Other Eukaryotes - 0 (source: NCBI BLink).	1.59585	0.193652	-0.601451	0.390718
809	Chr1	TAIR10	26279001	26280000	0	-0.436832	-0.0494641	-1.05133	-2.39353	-0.559767	-0.0729896	-0.544917	-3.92321	4.68139	4.88683	4.4697	3.70189	0.431635	0.496666	0.0329304	6.12974e-05	0.716477	0.836375	0.577549	0.621341	0	0	0	0	0	0	0	0	0	AT1G69810	0	Chr1	26277238	26279118	-	NaN	protein_coding	WRKY DNA-binding protein 36	member of WRKY Transcription Factor; Group II-b	WRKY DNA-binding protein 36 (WRKY36); CONTAINS InterPro DOMAIN/s: DNA-binding WRKY (InterPro:IPR003657); BEST Arabidopsis thaliana protein match is: WRKY family transcription factor (TAIR:AT4G04450.1); Has 3417 Blast hits to 2974 proteins in 232 species: Archae - 0; Bacteria - 11; Metazoa - 46; Fungi - 17; Plants - 3258; Viruses - 0; Other Eukaryotes - 85 (source: NCBI BLink).	0.0489096	1	0.814444	0.273481
2362	Chr4	TAIR10	12988001	12989000	0	-1.72205	-0.733593	-0.675985	-3.41387	-0.360952	-0.283707	-1.40611	-3.2842	4.94906	5.03518	5.2302	3.79476	0.031933	0.0978694	0.0744224	1.19996e-09	0.717823	0.314596	0.658942	0.809187	0	2	0	0	1	0	0	0	0	NaN	NaN	NaN	NaN	NaN	NaN	NaN	NaN	NaN	NaN	NaN	NaN	NaN	NaN	NaN
556	Chr1	TAIR10	20519001	20520000	0	-1.43513	-0.655775	-1.14398	-2.76712	-0.234381	-0.234854	-1.9148	-2.54099	3.9745	4.27272	3.97477	3.04685	0.189114	0.231905	0.0508546	0.000231804	0.719597	0.490164	0.379318	0.844386	1	0	0	0	0	0	0	0	0	NaN	NaN	NaN	NaN	NaN	NaN	NaN	NaN	NaN	NaN	NaN	NaN	NaN	NaN	NaN
524	Chr1	TAIR10	19621001	19622000	0	0.0458712	0.00265141	-2.05032	-1.36935	-0.542932	0.28815	-0.426136	-3.01544	5.82007	5.67617	4.9807	5.24456	0.492911	0.499978	1.90361e-07	9.73153e-05	0.721022	1.01733	0.190594	0.432616	0	0	0	0	0	0	0	0	0	AT1G52695	0	Chr1	19621238	19623461	-	NaN	protein_coding	alpha/beta-Hydrolases superfamily protein	---	alpha/beta-Hydrolases superfamily protein; FUNCTIONS IN: hydrolase activity, hydrolase activity, acting on ester bonds; INVOLVED IN: metabolic process; LOCATED IN: cellular_component unknown; CONTAINS InterPro DOMAIN/s: Phospholipase/carboxylesterase (InterPro:IPR003140); BEST Arabidopsis thaliana protein match is: alpha/beta-Hydrolases superfamily protein (TAIR:AT1G52700.1); Has 1130 Blast hits …	0	1	0	1
2921	Chr5	TAIR10	15865001	15866000	0	0.0941596	0.147501	-2.02651	-1.13584	-0.926635	0.586379	0.443177	-3.20462	5.77394	5.69509	4.92293	5.28936	0.471697	0.43669	4.72777e-07	0.00116474	0.72116	0.498882	0.225297	0.101534	1	1	0	0	0	0	0	0	0	AT5G39620	0	Chr5	15864166	15865782	-	NaN	protein_coding	RAB GTPase homolog G1	---	RAB GTPase homolog G1 (RABG1); FUNCTIONS IN: GTP binding; INVOLVED IN: protein transport, small GTPase mediated signal transduction; CONTAINS InterPro DOMAIN/s: Ras GTPase (InterPro:IPR001806), Small GTP-binding protein (InterPro:IPR005225), Small GTPase (InterPro:IPR020851), Ras (InterPro:IPR013753), Ras small GTPase, Rab type (InterPro:IPR003579); BEST Arabidopsis thaliana protein match is: RAB…	0	1	0	1
1687	Chr3	TAIR10	7756001	7757000	0	0.0786828	-0.129315	-1.93017	0.234885	0.279073	0.493789	0.274293	-2.72024	5.75725	5.5578	4.96043	5.96555	0.480289	0.464893	1.23728e-06	0.330466	0.722588	2.74604	0.169965	0.0856425	0	0	0	0	0	0	0	0	0	AT3G22020	0	Chr3	7756577	7757491	+	NaN	protein_coding	Receptor-like protein kinase-related family protein	---	Receptor-like protein kinase-related family protein; CONTAINS InterPro DOMAIN/s: Protein of unknown function DUF26 (InterPro:IPR002902); BEST Arabidopsis thaliana protein match is: Domain of unknown function (DUF26) (TAIR:AT3G22040.1); Has 903 Blast hits to 893 proteins in 17 species: Archae - 0; Bacteria - 0; Metazoa - 0; Fungi - 0; Plants - 903; Viruses - 0; Other Eukaryotes - 0 (source: NCBI B…	0	1	0.137504	1
1103	Chr2	TAIR10	9373001	9374000	0	0.0840436	0.0872433	-2.38521	-0.290839	-0.635788	0.529233	0.375996	-2.16008	6.34729	6.10532	5.32012	6.30408	0.466628	0.469499	4.82145e-12	0.224035	0.72356	0.620654	0.0495504	0.373069	0	1	0	0	0	0	0	0	0	AT2G22030	0	Chr2	9372530	9373681	+	NaN	protein_coding	Galactose oxidase/kelch repeat superfamily protein	---	Galactose oxidase/kelch repeat superfamily protein; CONTAINS InterPro DOMAIN/s: F-box domain, cyclin-like (InterPro:IPR001810), Galactose oxidase/kelch, beta-propeller (InterPro:IPR011043), Kelch repeat type 1 (InterPro:IPR006652), Kelch related (InterPro:IPR013089), Kelch-type beta propeller (InterPro:IPR015915); BEST Arabidopsis thaliana protein match is: Galactose oxidase/kelch repeat superfam…	0	1	0	1
450	Chr1	TAIR10	17599001	17600000	0	0.0574011	-0.219342	-1.71228	-0.2253	-0.104997	0.364695	0.585429	-1.63595	5.60716	5.41215	4.92785	5.59268	0.490447	0.413752	2.44815e-05	0.372555	0.724586	2.18636	0.022812	0.366447	1	0	0	0	0	0	0	0	0	AT1G47786	0	Chr1	17597898	17599099	+	NaN	protein_coding	alpha/beta-Hydrolases superfamily protein	---	alpha/beta-Hydrolases superfamily protein; FUNCTIONS IN: hydrolase activity; INVOLVED IN: biological_process unknown; LOCATED IN: endomembrane system; CONTAINS InterPro DOMAIN/s: Phospholipase/carboxylesterase (InterPro:IPR003140); BEST Arabidopsis thaliana protein match is: alpha/beta-Hydrolases superfamily protein (TAIR:AT1G47780.1); Has 1065 Blast hits to 1060 proteins in 341 species: Archae -…	0	1	0	1
2651	Chr5	TAIR10	4273001	4274000	0	-1.76073	-0.239849	-0.893045	-1.60547	-0.109026	-0.281168	-0.270703	-1.1912	5.44423	5.63608	5.62302	5.21585	0.00867983	0.383827	0.00635527	4.96263e-06	0.725311	0.0606693	0.143189	0.873838	0	1	0	0	0	0	0	0	0	AT5G13330	0	Chr5	4272060	4274660	+	NaN	protein_coding	related to AP2 6l	encodes a member of the ERF (ethylene response factor) subfamily B-4 of ERF/AP2 transcription factor family. The protein contains one AP2 domain. There are 7 members in this subfamily.	related to AP2 6l (Rap2.6L); FUNCTIONS IN: DNA binding, sequence-specific DNA binding transcription factor activity; INVOLVED IN: regulation of transcription, DNA-dependent; LOCATED IN: nucleus; EXPRESSED IN: 11 plant structures; EXPRESSED DURING: LP.04 four leaves visible, 4 anthesis, C globular stage, petal differentiation and expansion stage, E expanded cotyledon stage; CONTAINS InterPro DOMAI…	0.366128	0.813916	0.530515	0.523921
2977	Chr5	TAIR10	17404001	17405000	0	0.179462	0.0102378	-1.78083	-0.157307	-1.09332	1.13541	2.12308	-0.711798	5.6391	5.49132	4.86625	5.59689	0.41233	0.499717	1.70107e-05	0.433007	0.725923	0.989474	0.429221	0.749633	0	0	0	0	0	0	0	0	0	NaN	NaN	NaN	NaN	NaN	NaN	NaN	NaN	NaN	NaN	NaN	NaN	NaN	NaN	NaN
614	Chr1	TAIR10	22392001	22393000	0	-0.914995	-0.0386116	-1.70737	-0.870256	0.0134892	-0.145829	0.206137	-1.07192	4.67733	4.9795	4.26802	4.58175	0.262788	0.497831	0.000969466	0.0565995	0.726434	1.44373	0.228804	1.0339	0	0	0	0	0	0	0	0	0	AT1G60815	0	Chr1	22392729	22392974	+	NaN	protein_coding	RALF-like 7	Rapid alkalinization factor (RALF) family protein. Member of a diversely expressed predicted peptide family showing sequence similarity to tobacco Rapid Alkalinization Factor (RALF), and is believed to play an essential role in the physiology of Arabidopsis. Consists of a single exon and is characterized by a conserved C-terminal motif and N-terminal signal peptide.	RALF-like 7 (RALFL7); CONTAINS InterPro DOMAIN/s: Rapid ALkalinization Factor (InterPro:IPR008801); BEST Arabidopsis thaliana protein match is: RALF-like 6 (TAIR:AT1G60625.1); Has 26 Blast hits to 26 proteins in 3 species: Archae - 0; Bacteria - 0; Metazoa - 0; Fungi - 0; Plants - 26; Viruses - 0; Other Eukaryotes - 0 (source: NCBI BLink).	0	1	0	1
1440	Chr2	TAIR10	19413001	19414000	0	-2.63424	-1.20737	-1.23237	-1.72521	-0.533218	-0.417201	-1.04127	-2.45869	4.55484	4.70086	4.79905	4.46894	0.00372162	0.0150254	0.00456082	0.000179872	0.727031	0.0739354	0.332421	0.528265	0	0	0	0	0	0	0	0	0	AT2G47270	-851	Chr2	19411560	19412151	-	0	protein_coding	sequence-specific DNA binding transcription factors;transcription regulators	Encodes UPBEAT1 (UPB1), a transcription factor with a bHLH domain. Regulates the expression of a set of peroxidases that modulate the balance of reactive oxygen species (ROS) between the zones of cell proliferation and the zone of cell elongation where differentiation begins. Disruption of UPB1 activity alters this ROS balance, leading to a delay in the onset of differentiation.	sequence-specific DNA binding transcription factors;transcription regulators; Has 43 Blast hits to 43 proteins in 10 species: Archae - 0; Bacteria - 0; Metazoa - 0; Fungi - 0; Plants - 43; Viruses - 0; Other Eukaryotes - 0 (source: NCBI BLink).	1.28011	0.0368673	1.89308	0.00358625
1772	Chr3	TAIR10	10586001	10587000	0	-1.21221	-0.252536	-0.0315365	-2.2305	-0.304266	-0.191287	0.11233	-0.821201	6.33855	6.207	6.78292	5.67862	0.014064	0.323492	0.493956	2.22414e-14	0.728451	2.64002	0.928212	0.760526	0	1	1	0	0	0	0	0	0	AT3G28330	0	Chr3	10586566	10587712	-	NaN	protein_coding	F-box family protein-related	---	F-box family protein-related; CONTAINS InterPro DOMAIN/s: F-box associated interaction domain (InterPro:IPR017451); BEST Arabidopsis thaliana protein match is: F-box family protein (TAIR:AT3G28223.1); Has 118 Blast hits to 117 proteins in 4 species: Archae - 0; Bacteria - 0; Metazoa - 0; Fungi - 0; Plants - 118; Viruses - 0; Other Eukaryotes - 0 (source: NCBI BLink).	0.765535	0.247789	0.137504	1
3248	Chr5	TAIR10	25382001	25383000	0	-1.09864	-0.0127595	-0.952089	-1.8176	-0.379334	-0.173377	-1.52016	-3.06563	5.69073	5.79734	5.67439	5.1927	0.0768999	0.499582	0.00292403	2.41766e-07	0.728543	0.984637	0.526317	0.655267	0	1	0	1	1	0	0	0	0	AT5G63350	-819	Chr5	25380000	25381183	-	NaN	protein_coding	---	---	unknown protein; BEST Arabidopsis thaliana protein match is: unknown protein (TAIR:AT3G48510.1); Has 103 Blast hits to 102 proteins in 13 species: Archae - 0; Bacteria - 0; Metazoa - 2; Fungi - 0; Plants - 101; Viruses - 0; Other Eukaryotes - 0 (source: NCBI BLink).	1.45943	0.332923	-0.559427	0.24296
1974	Chr3	TAIR10	20873001	20874000	0	0.0786573	-0.168877	-1.41745	-1.31565	-0.361814	0.50884	0.491773	-2.6831	5.92649	5.66931	5.37362	5.36358	0.477904	0.437234	4.77459e-05	9.53443e-05	0.729745	2.03342	0.308806	0.569297	1	1	0	0	0	0	0	0	0	NaN	NaN	NaN	NaN	NaN	NaN	NaN	NaN	NaN	NaN	NaN	NaN	NaN	NaN	NaN
2176	Chr4	TAIR10	7440001	7441000	0	0.0875557	-0.170143	-1.89226	-1.42099	-0.638043	0.57734	-0.87427	-4.23971	5.52358	5.35861	4.74416	4.89382	0.479264	0.448017	1.15197e-05	0.000367361	0.734424	0.675478	0.382947	0.38062	0	1	0	0	0	0	0	0	0	NaN	NaN	NaN	NaN	NaN	NaN	NaN	NaN	NaN	NaN	NaN	NaN	NaN	NaN	NaN
147	Chr1	TAIR10	4702001	4703000	0	-1.08895	-0.633954	-0.83015	-1.5484	-0.699155	-0.16705	-0.386701	-1.86351	6.31191	5.99597	6.34239	5.96084	0.0295364	0.046709	0.00100418	7.95405e-09	0.735169	0.242725	0.383913	0.378188	0	1	1	0	1	0	0	0	0	AT1G13710	0	Chr1	4702725	4704657	-	1	protein_coding	cytochrome P450, family 78, subfamily A, polypeptide 5	Encodes the cytochrome P450 CYP78A5 monooxygenase. Contributes to the generation of a growth-stimulating signal distinct from the classical phytohormones that prevents proliferation arrest, promoting organ growth.	cytochrome P450, family 78, subfamily A, polypeptide 5 (CYP78A5); FUNCTIONS IN: electron carrier activity, monooxygenase activity, iron ion binding, oxygen binding, heme binding; INVOLVED IN: in 7 processes; LOCATED IN: endoplasmic reticulum; EXPRESSED IN: 10 plant structures; EXPRESSED DURING: F mature embryo stage, petal differentiation and expansion stage, E expanded cotyledon stage, D bilater…	0.35678	0.450394	-0.817567	0.00985673
721	Chr1	TAIR10	24574001	24575000	0	0.0941056	-0.527626	-1.08954	-0.0510858	-0.396295	0.623948	0.548395	-0.885228	6.46097	5.913	6.05003	6.5352	0.455275	0.106088	8.02793e-05	0.485673	0.735837	47.2583	0.103567	0.775088	1	1	0	0	0	0	0	0	0	AT1G66000	0	Chr1	24574344	24575438	+	NaN	protein_coding	Family of unknown function (DUF577)	---	Family of unknown function (DUF577); CONTAINS InterPro DOMAIN/s: Protein of unknown function DUF577 (InterPro:IPR007598); BEST Arabidopsis thaliana protein match is: Family of unknown function (DUF577) (TAIR:AT1G66060.1); Has 82 Blast hits to 52 proteins in 2 species: Archae - 0; Bacteria - 0; Metazoa - 0; Fungi - 0; Plants - 82; Viruses - 0; Other Eukaryotes - 0 (source: NCBI BLink).	0	1	0	1
2286	Chr4	TAIR10	10735001	10736000	0	-0.697128	-0.0232783	-1.71395	-1.47765	-0.179209	-0.106291	-0.705758	-2.66835	5.30214	5.42046	4.82656	4.86203	0.281131	0.498929	4.71197e-05	0.000241885	0.737238	0.938715	0.217883	0.784624	0	1	0	0	0	0	0	0	0	AT4G19730	-27	Chr4	10733864	10734975	-	NaN	protein_coding	Glycosyl hydrolase superfamily protein	---	Glycosyl hydrolase superfamily protein; FUNCTIONS IN: cation binding, chitinase activity, hydrolase activity, hydrolyzing O-glycosyl compounds, catalytic activity; INVOLVED IN: carbohydrate metabolic process; LOCATED IN: cellular_component unknown; CONTAINS InterPro DOMAIN/s: Glycoside hydrolase, family 18, catalytic domain (InterPro:IPR001223), Chitinase II (InterPro:IPR011583), Glycoside hydrol…	0	1	0	1
1626	Chr3	TAIR10	6916001	6917000	0	0.0845705	0.280953	-1.32458	-1.35061	-0.806463	0.574663	0.660367	-1.31338	5.62395	5.65127	5.1174	5.03331	0.47926	0.310478	0.000575592	0.000380952	0.741179	0.402212	0.00425083	0.252496	0	1	0	0	0	0	0	0	0	AT3G19890	0	Chr3	6914910	6916142	-	NaN	protein_coding	F-box family protein	---	F-box family protein; CONTAINS InterPro DOMAIN/s: F-box domain, cyclin-like (InterPro:IPR001810), F-box domain, Skp2-like (InterPro:IPR022364), F-box associated domain, type 1 (InterPro:IPR006527), F-box associated interaction domain (InterPro:IPR017451); BEST Arabidopsis thaliana protein match is: F-box family protein (TAIR:AT1G32140.1); Has 1038 Blast hits to 987 proteins in 15 species: Archae …	0	1	0	1
116	Chr1	TAIR10	4164001	4165000	0	0.0778328	0.524377	-1.53589	-0.950729	-0.449084	0.539389	0.0324901	-2.80608	6.12495	6.15698	5.51253	5.74966	0.475243	0.0473625	3.16716e-06	0.00145087	0.745381	0.88015	0.292672	0.358878	1	1	0	0	0	0	0	0	0	AT1G12260	0	Chr1	4162832	4165852	-	NaN	protein_coding	NAC 007	Encodes a NAC-domain transcription factor. Expressed in the vascular tissue.	NAC 007 (NAC007); CONTAINS InterPro DOMAIN/s: No apical meristem (NAM) protein (InterPro:IPR003441); BEST Arabidopsis thaliana protein match is: Arabidopsis NAC domain containing protein 26 (TAIR:AT1G62700.1); Has 3158 Blast hits to 3153 proteins in 90 species: Archae - 0; Bacteria - 0; Metazoa - 15; Fungi - 2; Plants - 3027; Viruses - 0; Other Eukaryotes - 114 (source: NCBI BLink).	-1	0.45815	0.835369	0.0808724
2577	Chr5	TAIR10	2219001	2220000	0	-2.12121	-0.594403	-0.854599	-1.29321	-0.759641	-0.309599	-0.802382	-1.69614	5.06414	5.25982	5.35594	5.07509	0.00543742	0.143086	0.0180421	0.000570904	0.745884	0.149111	0.330178	0.260171	0	0	0	0	0	0	0	0	0	AT5G07160	0	Chr5	2219971	2220709	-	NaN	protein_coding	Basic-leucine zipper (bZIP) transcription factor family protein	---	Basic-leucine zipper (bZIP) transcription factor family protein; FUNCTIONS IN: DNA binding, sequence-specific DNA binding transcription factor activity; INVOLVED IN: regulation of transcription, DNA-dependent; CONTAINS InterPro DOMAIN/s: Basic-leucine zipper (bZIP) transcription factor (InterPro:IPR004827), bZIP transcription factor, bZIP-1 (InterPro:IPR011616); BEST Arabidopsis thaliana protein …	0	1	0	1
2896	Chr5	TAIR10	15192001	15193000	0	0.193033	0.343591	-2.21119	-0.884249	-1.07966	1.33328	1.12582	-1.85687	5.48317	5.53411	4.49909	5.06681	0.409286	0.259184	2.22245e-06	0.0214658	0.746082	0.531618	0.0871398	0.0996043	0	0	0	0	0	0	0	0	0	AT5G38080	0	Chr5	15191715	15192645	-	NaN	protein_coding	---	---	unknown protein; BEST Arabidopsis thaliana protein match is: unknown protein (TAIR:AT5G38090.1); Has 1807 Blast hits to 1807 proteins in 277 species: Archae - 0; Bacteria - 0; Metazoa - 736; Fungi - 347; Plants - 385; Viruses - 0; Other Eukaryotes - 339 (source: NCBI BLink).	0	1	0.263034	0.831812
3024	Chr5	TAIR10	18783001	18784000	0	0.136688	0.240517	-1.69291	-1.9904	-0.765493	0.945979	-0.740723	-4.17076	5.32742	5.38545	4.62262	4.38312	0.456916	0.373965	0.000194718	2.36753e-05	0.746119	1.96954	0.422721	0.444791	0	0	0	0	0	0	0	0	0	AT5G46300	0	Chr5	18783610	18784786	+	NaN	protein_coding	---	---	unknown protein; Has 1807 Blast hits to 1807 proteins in 277 species: Archae - 0; Bacteria - 0; Metazoa - 736; Fungi - 347; Plants - 385; Viruses - 0; Other Eukaryotes - 339 (source: NCBI BLink).	0	1	0	1
444	Chr1	TAIR10	17390001	17391000	0	0.0763238	-0.104942	-1.06822	-0.569632	-0.80921	0.533592	0.320074	-1.5487	6.57114	6.18904	6.17755	6.39784	0.467817	0.464214	5.18399e-05	0.0186928	0.747273	1.9574	0.183746	0.174006	1	0	0	0	0	0	0	0	0	NaN	NaN	NaN	NaN	NaN	NaN	NaN	NaN	NaN	NaN	NaN	NaN	NaN	NaN	NaN
1466	Chr3	TAIR10	668001	669000	0	-1.95587	0.0188684	-1.71679	-2.70284	-0.908014	-0.280883	-0.974498	-3.88446	5.37884	5.73808	5.21065	4.65017	0.00419543	0.49886	2.67775e-06	1.10267e-10	0.749518	1.04167	0.387137	0.49734	0	0	0	0	0	0	0	0	0	AT3G02960	0	Chr3	667245	668626	-	NaN	protein_coding	Heavy metal transport/detoxification superfamily protein	---	Heavy metal transport/detoxification superfamily protein ; FUNCTIONS IN: copper ion binding, metal ion binding; INVOLVED IN: copper ion transport, metal ion transport; CONTAINS InterPro DOMAIN/s: Heavy metal transport/detoxification protein (InterPro:IPR006121); BEST Arabidopsis thaliana protein match is: Heavy metal transport/detoxification superfamily protein (TAIR:AT5G50740.1); Has 1622 Blast …	0	1	0	1
341	Chr1	TAIR10	11022001	11023000	0	-1.46269	0.0911127	-1.1403	-0.805057	-0.699995	-0.210038	0.216628	-1.62836	6.25696	6.34888	6.23118	6.37191	0.00367337	0.460971	9.69592e-06	0.000791933	0.749764	0.405226	0.176407	0.0698988	0	1	0	0	0	0	0	0	0	NaN	NaN	NaN	NaN	NaN	NaN	NaN	NaN	NaN	NaN	NaN	NaN	NaN	NaN	NaN
2074	Chr4	TAIR10	655001	656000	0	0.0264236	0.734715	-1.06915	-0.719952	-0.470042	0.191771	0.170931	-2.28681	6.76322	6.76765	6.39083	6.54488	0.495466	0.000427191	1.17975e-05	0.00149369	0.750915	0.621149	0.36305	0.210363	0	1	0	0	0	0	0	0	0	NaN	NaN	NaN	NaN	NaN	NaN	NaN	NaN	NaN	NaN	NaN	NaN	NaN	NaN	NaN
933	Chr2	TAIR10	10001	11000	0	0.267992	1.10154	-1.1401	-0.0493163	-0.117631	1.90584	1.72363	1.11451	8.16803	7.92865	7.62129	8.1949	0.0418226	1.87381e-16	2.2507e-13	0.45898	0.752745	0.22004	95.5818	0.41416	0	0	0	0	0	0	0	0	1	AT2G01023	-235	Chr2	9648	9767	-	NaN	protein_coding	---	---	unknown protein; Has 30201 Blast hits to 17322 proteins in 780 species: Archae - 12; Bacteria - 1396; Metazoa - 17338; Fungi - 3422; Plants - 5037; Viruses - 0; Other Eukaryotes - 2996 (source: NCBI BLink).	-0.241008	0.83882	-0.378512	0.67764
3158	Chr5	TAIR10	22835001	22836000	0	0.672442	0.47308	-2.64606	-0.929878	-0.46491	0.0939368	0.19563	-4.26052	5.44693	5.38877	4.01825	4.76146	0.0467766	0.162119	1.53907e-06	0.0298804	0.752891	0.413666	0.233824	0.33384	0	1	0	0	0	0	0	0	0	AT5G56370	0	Chr5	22835982	22837941	-	0	protein_coding	F-box/RNI-like/FBD-like domains-containing protein	---	F-box/RNI-like/FBD-like domains-containing protein; CONTAINS InterPro DOMAIN/s: FBD (InterPro:IPR013596), F-box domain, cyclin-like (InterPro:IPR001810), F-box domain, Skp2-like (InterPro:IPR022364), FBD-like (InterPro:IPR006566), Leucine-rich repeat 2 (InterPro:IPR013101); BEST Arabidopsis thaliana protein match is: F-box/RNI-like/FBD-like domains-containing protein (TAIR:AT5G56420.2); Has 1807 …	-0.446064	0.73315	2.25598	2.97853e-08
741	Chr1	TAIR10	24795001	24796000	0	0.109963	-0.115427	-1.31527	-0.399689	-0.147602	0.786671	0.563342	-1.3044	6.60977	6.20104	6.08025	6.50513	0.433877	0.456695	1.1247e-06	0.0875038	0.753041	1.50866	0.00415414	0.462297	0	1	0	0	0	0	0	0	0	AT1G66470	0	Chr1	24795214	24796988	+	NaN	protein_coding	ROOT HAIR DEFECTIVE6	---	ROOT HAIR DEFECTIVE6 (RHD6); CONTAINS InterPro DOMAIN/s: Helix-loop-helix DNA-binding domain (InterPro:IPR001092), Helix-loop-helix DNA-binding (InterPro:IPR011598); BEST Arabidopsis thaliana protein match is: RHD SIX-LIKE 1 (TAIR:AT5G37800.1); Has 2452 Blast hits to 2438 proteins in 100 species: Archae - 0; Bacteria - 0; Metazoa - 23; Fungi - 2; Plants - 2416; Viruses - 0; Other Eukaryotes - 11 …	0	1	0	1
1674	Chr3	TAIR10	7725001	7726000	0	0.0879423	0.298652	-1.1859	-0.165303	-0.00572018	0.63819	0.189016	-1.0826	6.67231	6.45699	6.21488	6.69764	0.454803	0.195084	4.56217e-06	0.355644	0.755697	0.223898	0.0455758	0.944148	0	0	0	0	0	0	0	0	0	NaN	NaN	NaN	NaN	NaN	NaN	NaN	NaN	NaN	NaN	NaN	NaN	NaN	NaN	NaN
2481	Chr4	TAIR10	17321001	17322000	0	0.0220712	-0.510756	-0.983126	-1.5712	-0.13108	0.165356	-1.22101	-3.59105	5.93904	5.55046	5.62265	5.27763	0.498208	0.161522	0.00252264	4.98763e-06	0.756411	0.410607	0.57039	0.84699	0	1	0	0	1	0	1	0	0	NaN	NaN	NaN	NaN	NaN	NaN	NaN	NaN	NaN	NaN	NaN	NaN	NaN	NaN	NaN
2645	Chr5	TAIR10	3986001	3987000	0	-2.67355	-0.692265	-2.15464	-2.52892	-0.908972	-0.366323	-0.827297	-3.57278	6.25786	6.23085	6.04253	5.82085	3.64108e-08	0.0179561	7.78039e-16	5.08344e-20	0.759488	0.0889792	0.247693	0.471478	1	1	0	0	1	0	0	0	0	NaN	NaN	NaN	NaN	NaN	NaN	NaN	NaN	NaN	NaN	NaN	NaN	NaN	NaN	NaN
1911	Chr3	TAIR10	18428001	18429000	0	0.0668375	-0.156714	-1.3455	-0.962598	-0.91854	0.50087	0.382606	-2.03359	6.37629	6.02159	5.85701	6.0067	0.478202	0.431448	4.32023e-06	0.000389569	0.761851	2.36656	0.20375	0.0234457	1	0	0	0	0	0	0	0	0	AT3G49690	0	Chr3	18427735	18429201	+	NaN	protein_coding	myb domain protein 84	Putative homolog of the Blind gene in tomato. Together with RAX1 and RAX3 belong to the class R2R3 MYB genes; encoded by the Myb-like transcription factor MYB84, regulates axillary meristem formation.	myb domain protein 84 (MYB84); CONTAINS InterPro DOMAIN/s: SANT, DNA-binding (InterPro:IPR001005), Homeodomain-like (InterPro:IPR009057), Myb, DNA-binding (InterPro:IPR014778), HTH transcriptional regulator, Myb-type, DNA-binding (InterPro:IPR017930), Homeodomain-related (InterPro:IPR012287), Myb transcription factor (InterPro:IPR015495); BEST Arabidopsis thaliana protein match is: myb domain pro…	-0.156119	0.913671	0.329308	0.692673
2612	Chr5	TAIR10	3177001	3178000	0	0.085881	0.110021	-2.9028	-1.3213	-0.467694	0.642252	-0.214286	-4.3593	6.55186	6.27176	5.27184	5.99737	0.460122	0.446871	6.85216e-17	7.5449e-07	0.762013	3.17124	0.200617	0.477677	0	1	0	0	0	0	0	0	0	AT5G10140	0	Chr5	3173497	3179448	-	0	protein_coding	K-box region and MADS-box transcription factor family protein	MADS-box protein encoded by FLOWERING LOCUS C - transcription factor that functions as a repressor of floral transition and contributes to temperature compensation of the circadian clock. Expression is downregulated during cold treatment. Vernalization, FRI and the autonomous pathway all influence the state of FLC chromatin. Both maternal and paternal alleles are reset by vernalization, but their…	FLOWERING LOCUS C (FLC); CONTAINS InterPro DOMAIN/s: Transcription factor, MADS-box (InterPro:IPR002100), Transcription factor, K-box (InterPro:IPR002487); BEST Arabidopsis thaliana protein match is: K-box region and MADS-box transcription factor family protein (TAIR:AT1G77080.4); Has 1807 Blast hits to 1807 proteins in 277 species: Archae - 0; Bacteria - 0; Metazoa - 736; Fungi - 347; Plants - 3…	0.513801	0.355813	1.74543	9.49335e-10
27	Chr1	TAIR10	857001	858000	0	-0.914022	0.331655	-1.76459	-0.63772	-0.858581	-0.124262	0.659958	-1.12743	5.21043	5.56795	4.76529	5.24361	0.197505	0.267166	4.0602e-05	0.0785592	0.762108	0.330413	0.220471	0.147802	0	0	0	0	0	0	0	0	0	AT1G03445	0	Chr1	854410	859701	-	NaN	protein_coding	Serine/threonine protein phosphatase family protein	encodes a serine?threonine protein phosphatase with an N-terminal Kelch-repeat domain, which is nuclear localized and expressed preferentially in elongating cells. Genetic evidence suggest that this gene plays a redundant role (along with other members of the same gene family) in modulating growth in response to brassinosteroid.	BRI1 SUPPRESSOR 1 (BSU1); FUNCTIONS IN: protein binding, protein serine/threonine phosphatase activity; INVOLVED IN: brassinosteroid mediated signaling pathway, regulation of protein localization; LOCATED IN: nucleus; EXPRESSED IN: sperm cell, male gametophyte, cultured cell, pollen tube; EXPRESSED DURING: L mature pollen stage, M germinated pollen stage; CONTAINS InterPro DOMAIN/s: Serine/threon…	-0.514573	0.391528	0.201634	0.760792
2454	Chr4	TAIR10	16421001	16422000	0	-1.33624	-0.446236	-0.577164	-1.54535	-0.500649	-0.17681	-1.17407	-2.38958	4.89468	5.04638	5.12916	4.57458	0.101454	0.272174	0.136993	0.00053385	0.7673	0.449751	0.611323	0.511106	0	1	0	0	0	0	0	0	0	AT4G34320	-166	Chr4	16422166	16423948	+	0	protein_coding	Protein of unknown function (DUF677)	---	Protein of unknown function (DUF677); FUNCTIONS IN: molecular_function unknown; INVOLVED IN: N-terminal protein myristoylation; LOCATED IN: cellular_component unknown; EXPRESSED IN: hypocotyl, sepal, flower, carpel, stamen; EXPRESSED DURING: 4 anthesis, petal differentiation and expansion stage; CONTAINS InterPro DOMAIN/s: Protein of unknown function DUF677 (InterPro:IPR007749); BEST Arabidopsis …	-0.115477	1	1.69188	0.00159316
318	Chr1	TAIR10	10048001	10049000	0	0.0267005	-0.524654	-1.2787	-0.512675	-0.0265088	0.211388	-0.125246	-1.80314	5.7698	5.41375	5.31159	5.63123	0.497669	0.169034	0.000367959	0.104569	0.769248	0.616466	0.170282	0.905028	0	0	0	0	0	0	0	0	0	AT1G28590	0	Chr1	10047276	10049300	-	NaN	protein_coding	GDSL-like Lipase/Acylhydrolase superfamily protein	---	GDSL-like Lipase/Acylhydrolase superfamily protein; FUNCTIONS IN: hydrolase activity, acting on ester bonds, carboxylesterase activity; INVOLVED IN: lipid metabolic process; LOCATED IN: endomembrane system; CONTAINS InterPro DOMAIN/s: Lipase, GDSL (InterPro:IPR001087); BEST Arabidopsis thaliana protein match is: GDSL-like Lipase/Acylhydrolase superfamily protein (TAIR:AT2G27360.1); Has 3435 Blast…	-0.125531	1	-0.263034	0.831812
897	Chr1	TAIR10	29523001	29524000	0	-2.18772	-0.626891	-1.59991	-2.68663	-0.939902	-0.279157	-0.542041	-2.30251	3.68214	4.20605	3.65294	2.98039	0.0789872	0.255757	0.013945	0.000502125	0.774304	0.0727123	0.180135	0.481919	0	0	0	0	0	0	0	0	0	AT1G78476	0	Chr1	29523982	29526284	+	NaN	protein_coding	---	---	unknown protein.	0.359081	0.818372	0.816288	0.304301
230	Chr1	TAIR10	7455001	7456000	0	-2.14726	-1.18704	-2.07404	-2.15361	-0.953575	-0.273876	-0.649413	-2.44593	4.95642	4.92284	4.67	4.54126	0.00678582	0.0096157	2.52481e-06	1.10581e-06	0.774402	0.29307	0.0823153	0.386463	0	1	1	0	1	0	0	0	0	AT1G21310	0	Chr1	7453236	7455009	-	1	protein_coding	extensin 3	Encodes extensin 3.	extensin 3 (EXT3); FUNCTIONS IN: structural constituent of cell wall; INVOLVED IN: plant-type cell wall organization; LOCATED IN: endomembrane system; EXPRESSED IN: 7 plant structures; EXPRESSED DURING: 4 anthesis, F mature embryo stage, petal differentiation and expansion stage, E expanded cotyledon stage, D bilateral stage; CONTAINS InterPro DOMAIN/s: Extensin-like repeat (InterPro:IPR006706); …	1.43296	0.0252987	1.60881	7.04813e-06
44	Chr1	TAIR10	1538001	1539000	0	0.335125	0.277447	-1.79813	-1.01738	-0.455296	0.0417212	-0.292454	-3.47104	5.06914	5.13174	4.21996	4.50359	0.317902	0.361568	0.000614011	0.0297803	0.774467	43.8143	0.317611	0.382196	0	1	0	0	0	0	0	0	0	NaN	NaN	NaN	NaN	NaN	NaN	NaN	NaN	NaN	NaN	NaN	NaN	NaN	NaN	NaN
2018	Chr3	TAIR10	22418001	22419000	0	-1.06058	-0.196879	-0.329348	-1.51061	0.107693	-0.133257	-0.799566	-2.28297	6.33833	6.20239	6.6022	5.99953	0.0325085	0.384061	0.155137	1.19e-08	0.778063	0.606053	0.748423	1.15517	0	1	0	0	0	0	0	0	0	AT3G60647	-351	Chr3	22419351	22419548	+	NaN	protein_coding	---	---	unknown protein; LOCATED IN: endomembrane system; Has 30201 Blast hits to 17322 proteins in 780 species: Archae - 12; Bacteria - 1396; Metazoa - 17338; Fungi - 3422; Plants - 5037; Viruses - 0; Other Eukaryotes - 2996 (source: NCBI BLink).	0.263034	0.831812	0.137504	1
1256	Chr2	TAIR10	13744001	13745000	0	0.091567	0.444318	-1.5851	-1.25615	-1.77375	0.745798	0.785282	-1.26602	6.09663	6.09016	5.45422	5.56093	0.466701	0.099397	2.40389e-06	6.47801e-05	0.779436	0.276846	0.111994	0.170944	0	1	0	0	0	0	0	0	0	AT2G32370	0	Chr2	13740878	13746286	+	NaN	protein_coding	homeodomain GLABROUS 3	Encodes a homeobox-leucine zipper family protein belonging to the HD-ZIP IV family. Together with ATML1 and PDF2, it is involved in cotyledon development.	homeodomain GLABROUS 3 (HDG3); FUNCTIONS IN: DNA binding, sequence-specific DNA binding transcription factor activity; INVOLVED IN: regulation of transcription, DNA-dependent, cotyledon development; LOCATED IN: nucleus; EXPRESSED IN: fruit; EXPRESSED DURING: seedling growth; CONTAINS InterPro DOMAIN/s: Homeobox, conserved site (InterPro:IPR017970), Homeobox (InterPro:IPR001356), Homeodomain-like …	0	1	0.584963	0.361595
1616	Chr3	TAIR10	6443001	6444000	0	0.041297	0.0567686	-1.32551	-1.3921	-0.761638	0.341434	-0.334906	-4.43496	5.89678	5.76336	5.40695	5.31406	0.493935	0.489597	0.000126438	4.72479e-05	0.780122	1.41841	0.539978	0.293003	1	0	0	0	0	0	0	0	0	NaN	NaN	NaN	NaN	NaN	NaN	NaN	NaN	NaN	NaN	NaN	NaN	NaN	NaN	NaN
1113	Chr2	TAIR10	9618001	9619000	0	0.0492804	0.0589189	-0.699507	-1.45834	-0.781855	0.410754	-0.341912	-3.17925	6.29385	6.06371	6.09504	5.68342	0.488687	0.486247	0.0121821	9.83569e-07	0.782352	1.42648	0.639644	0.302245	1	1	0	0	0	0	0	0	0	AT2G22630	0	Chr2	9618372	9621957	+	0	protein_coding	AGAMOUS-like 17	Encodes a MADs domain containing protein involved in promoting flowering. Loss of function mutations show delayed flowering in long days and reduced levels of LFY and AP1 expression.	AGAMOUS-like 17 (AGL17); FUNCTIONS IN: sequence-specific DNA binding transcription factor activity; INVOLVED IN: positive regulation of long-day photoperiodism, flowering; LOCATED IN: nucleus; EXPRESSED IN: 7 plant structures; EXPRESSED DURING: L mature pollen stage; CONTAINS InterPro DOMAIN/s: Transcription factor, MADS-box (InterPro:IPR002100), Transcription factor, K-box (InterPro:IPR002487); …	0	1	2.10434	7.52231e-05
1638	Chr3	TAIR10	7255001	7256000	0	0.0316627	0.151733	-1.17607	-0.257717	-0.342753	0.267484	0.49681	-1.45584	6.31438	6.13245	5.89482	6.31377	0.495231	0.411828	5.35277e-05	0.26507	0.783078	0.530443	0.106379	0.14209	0	2	0	0	0	0	0	0	0	AT3G20750	0	Chr3	7254739	7256140	+	NaN	protein_coding	GATA transcription factor 29	Encodes a member of the GATA factor family of zinc finger transcription factors.	GATA transcription factor 29 (GATA29); FUNCTIONS IN: sequence-specific DNA binding, zinc ion binding, sequence-specific DNA binding transcription factor activity; INVOLVED IN: regulation of transcription, DNA-dependent; CONTAINS InterPro DOMAIN/s: Zinc finger, NHR/GATA-type (InterPro:IPR013088), Zinc finger, GATA-type (InterPro:IPR000679); BEST Arabidopsis thaliana protein match is: GATA transcri…	0	1	0	1
[truncated: 2,713 more rows]
[truncated: 42 more columns]

## Sheet: S3B_clf-29_MAnorm_windowsize
Table S3B. 51% regions with reduced H3K27me3 in clf-29 show less less reduction in summit regions (marked as "1" in Col I). Briefly, two rounds of MAnorm were run to compare H3K27me3 level between clf-29 and Col-0 with different window sizes (1000bp and 200bp), and those regions with H3K27me3 reduction in clf-29 when window size set to 1000 bp were kept. "1" in column I representing those regions…
[truncated: 1,857 more rows]

## Sheet: S3C_tfl2-2_MAnorm_windowsize
Table S3C. 53% regions with reduced H3K27me3 in tfl2-2 show less less reduction in summit regions (marked as "1" in Col I). Briefly, two rounds of MAnorm were run to compare H3K27me3 level between tfl2-2 and Col-0 with different window sizes (1000bp and 200bp), and those regions with H3K27me3 reduction in tfl2-2 with window size set to 1000 bp were kept. "1" in column I representing those regions…
[truncated: 1,604 more rows]
